# Supplementary material
Source: PubMed Central journal article supplement (PMC9125432)

# emm49\_Cluster1

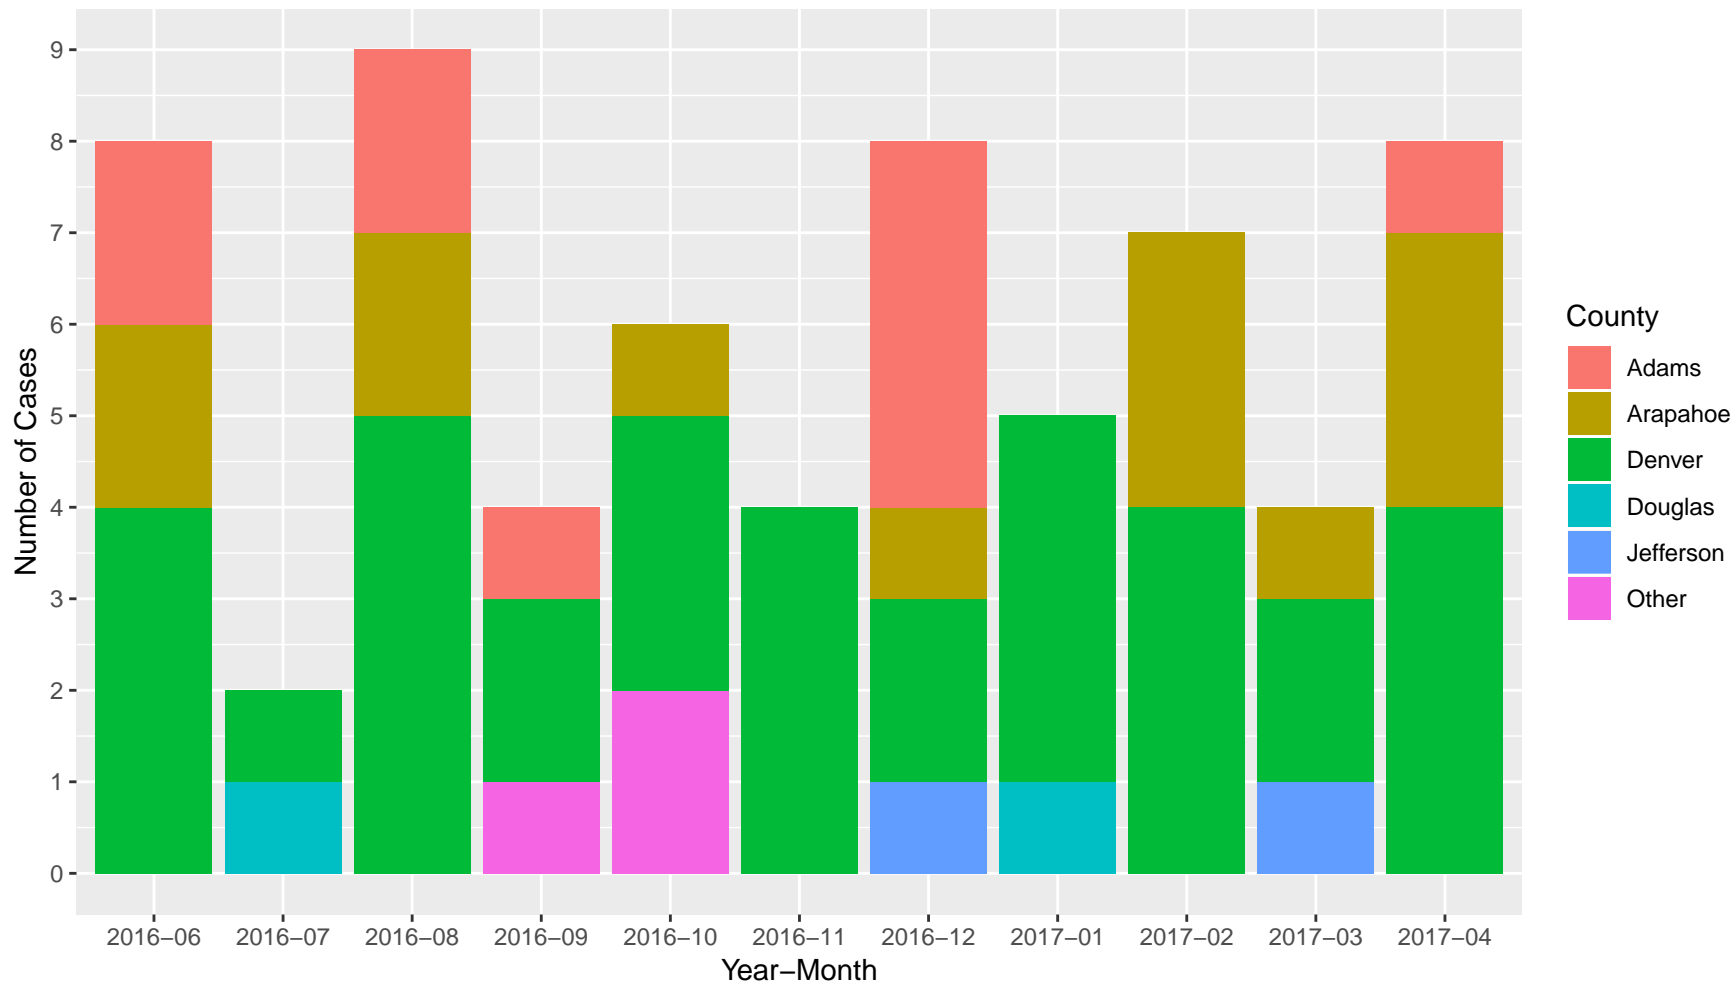

*emm3\_Cluster1*

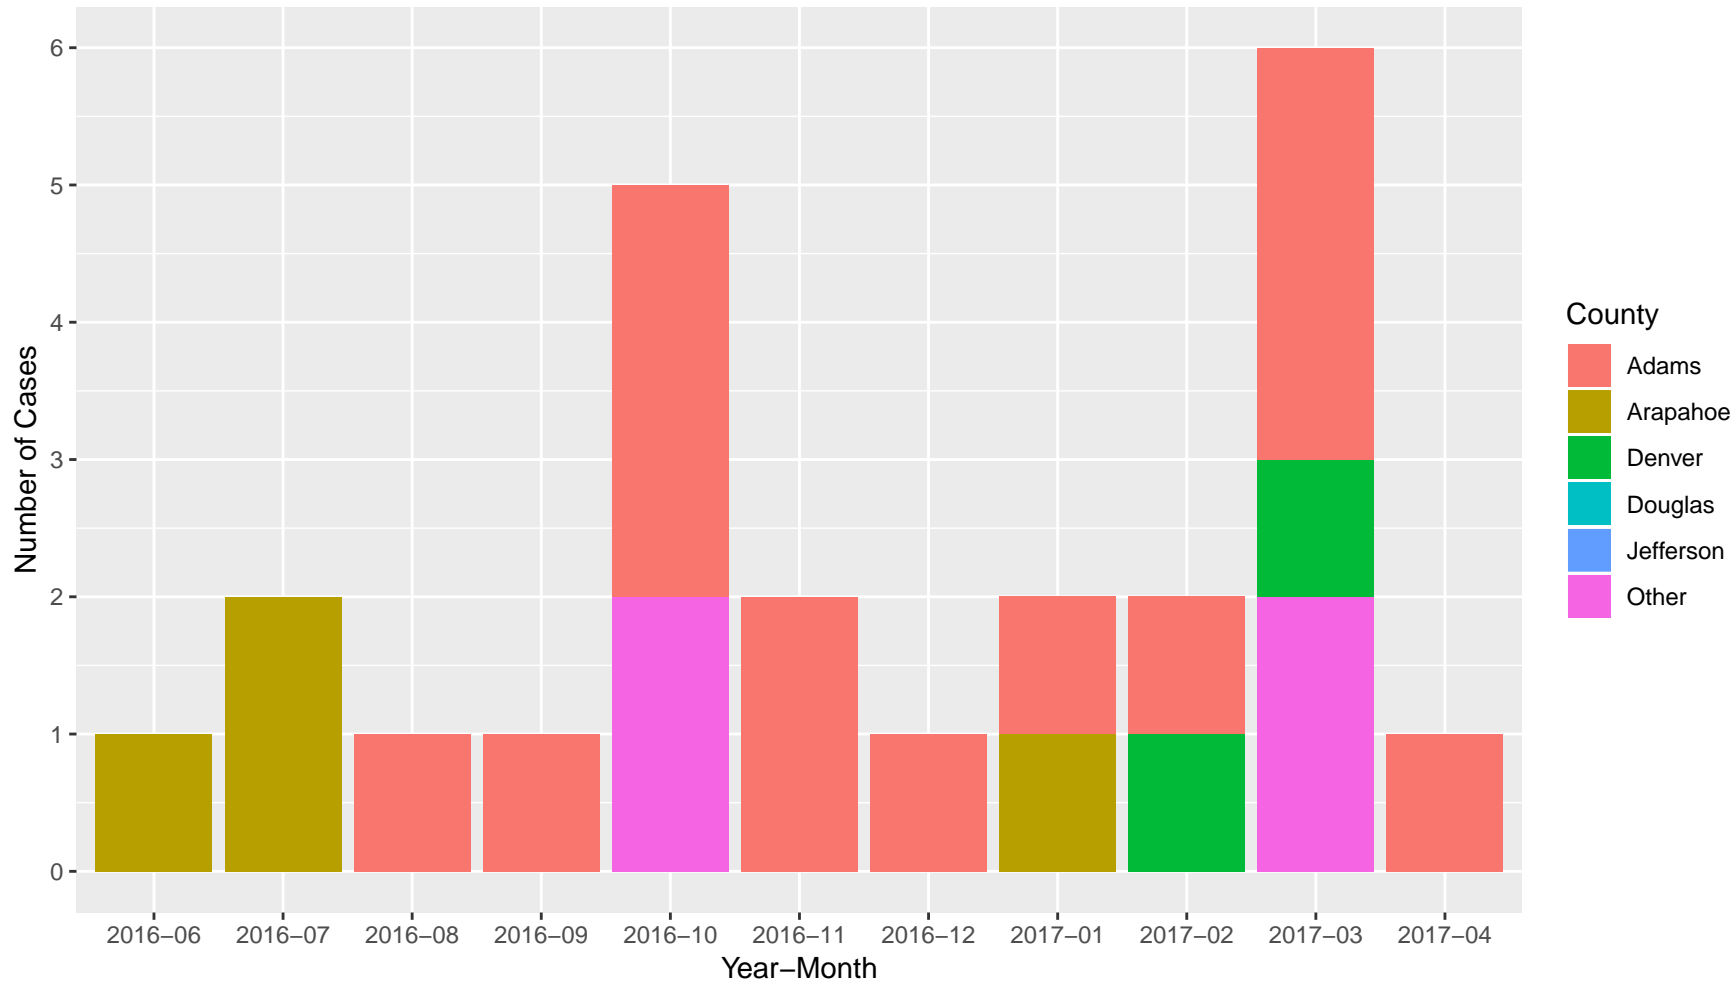

# emm6\_Cluster1

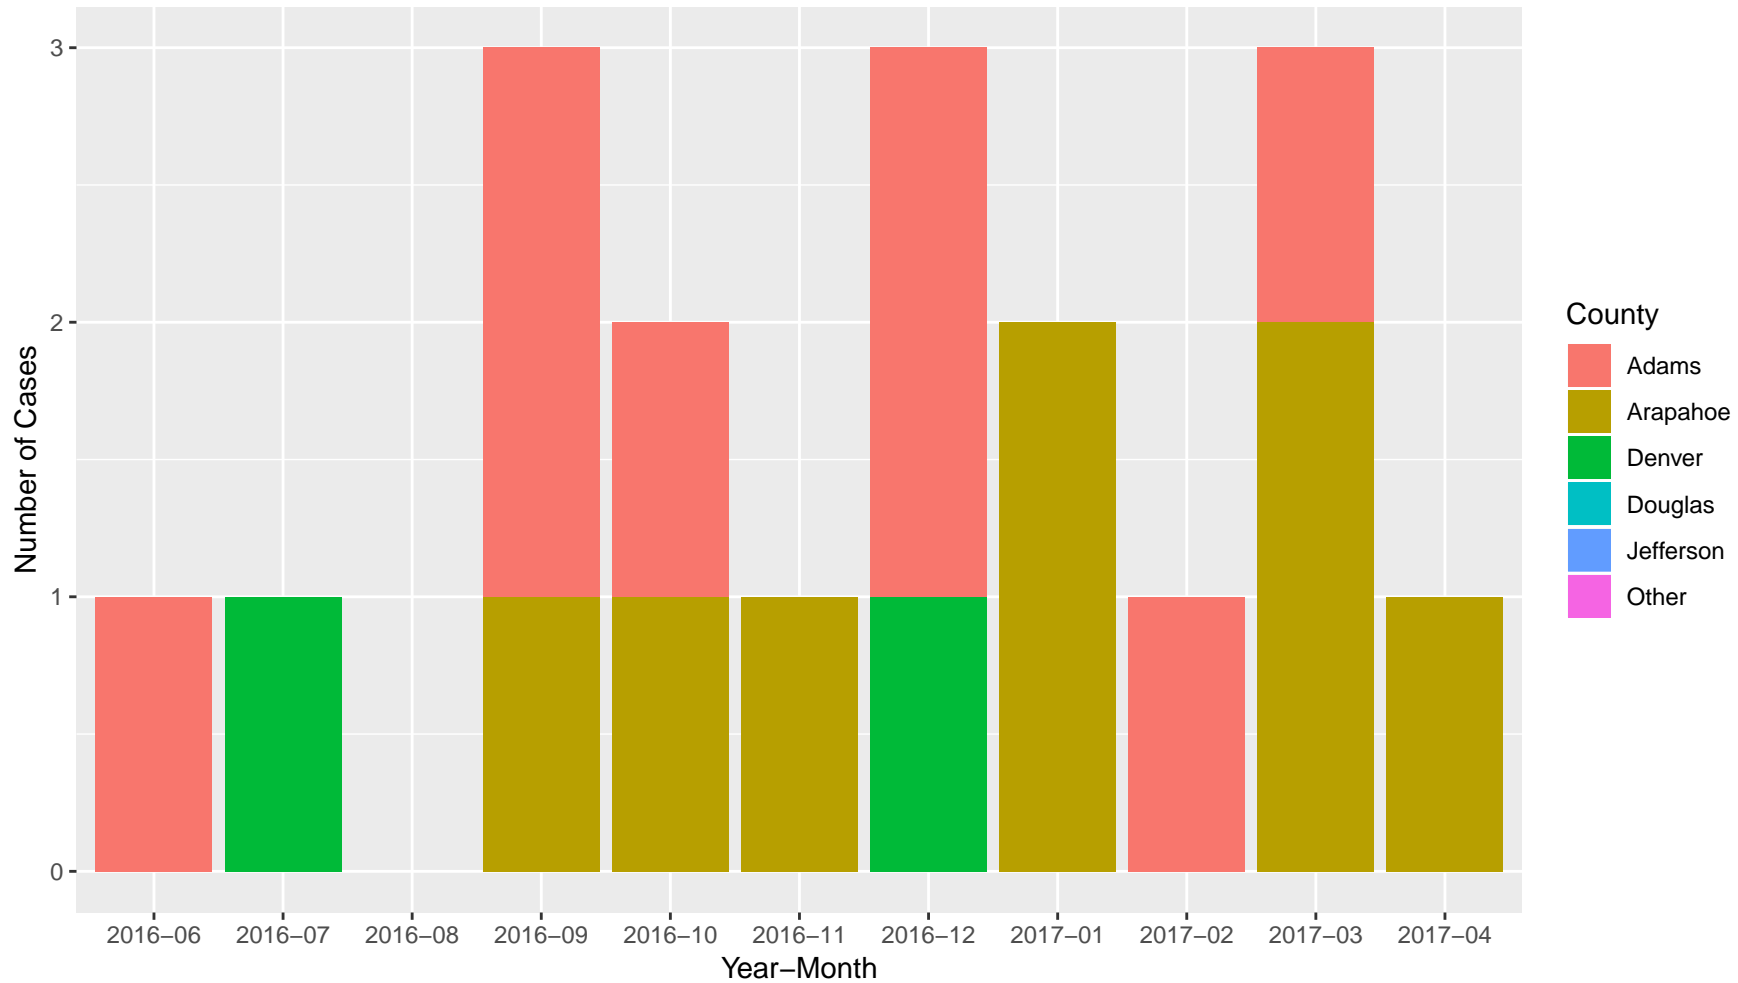

*emm92\_Cluster1*

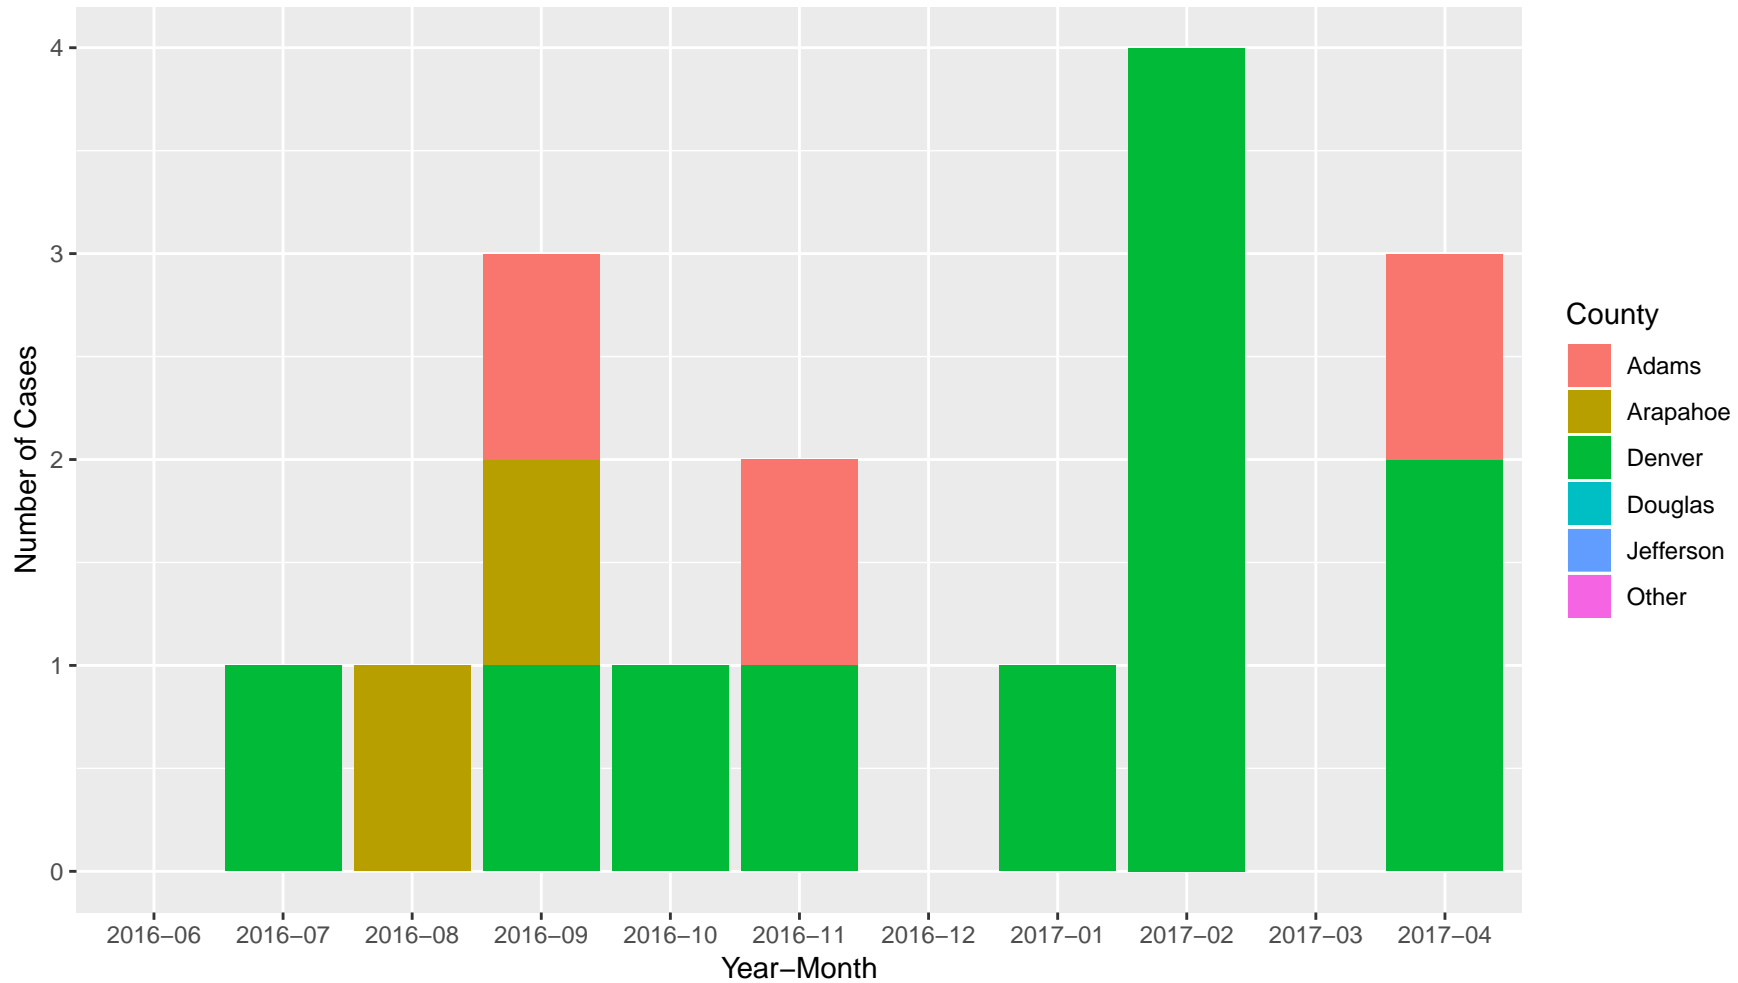

*emm89\_Cluster3*

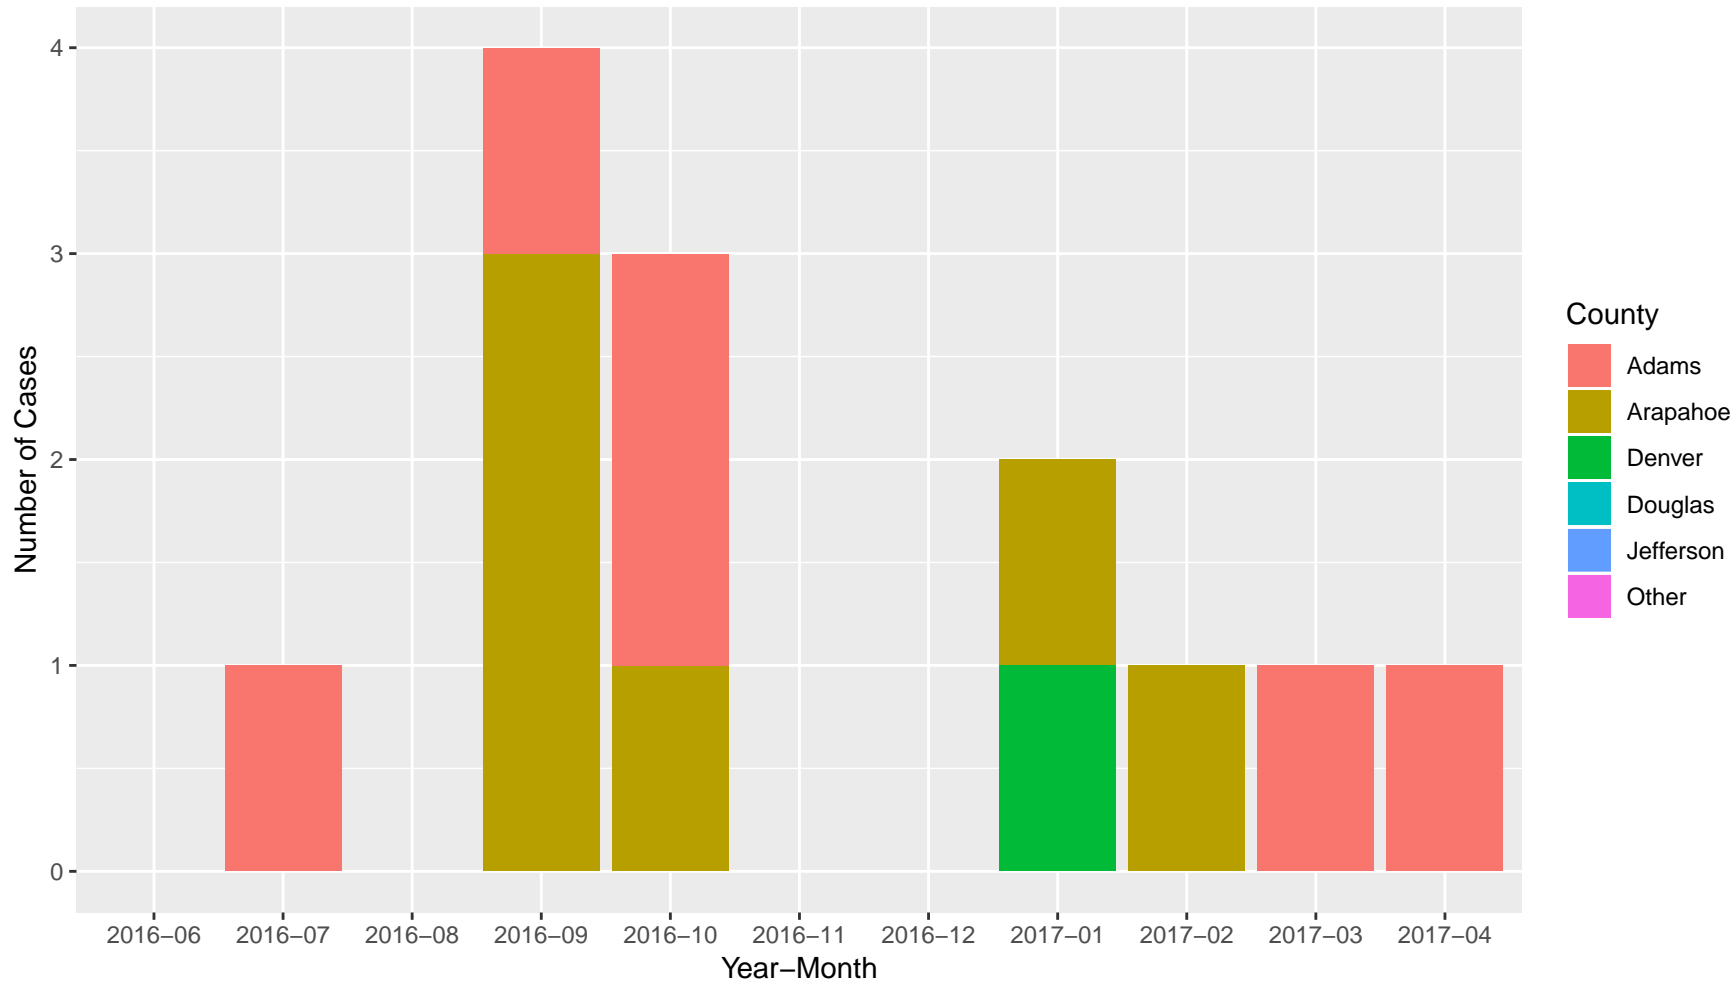

# emm1\_Cluster10

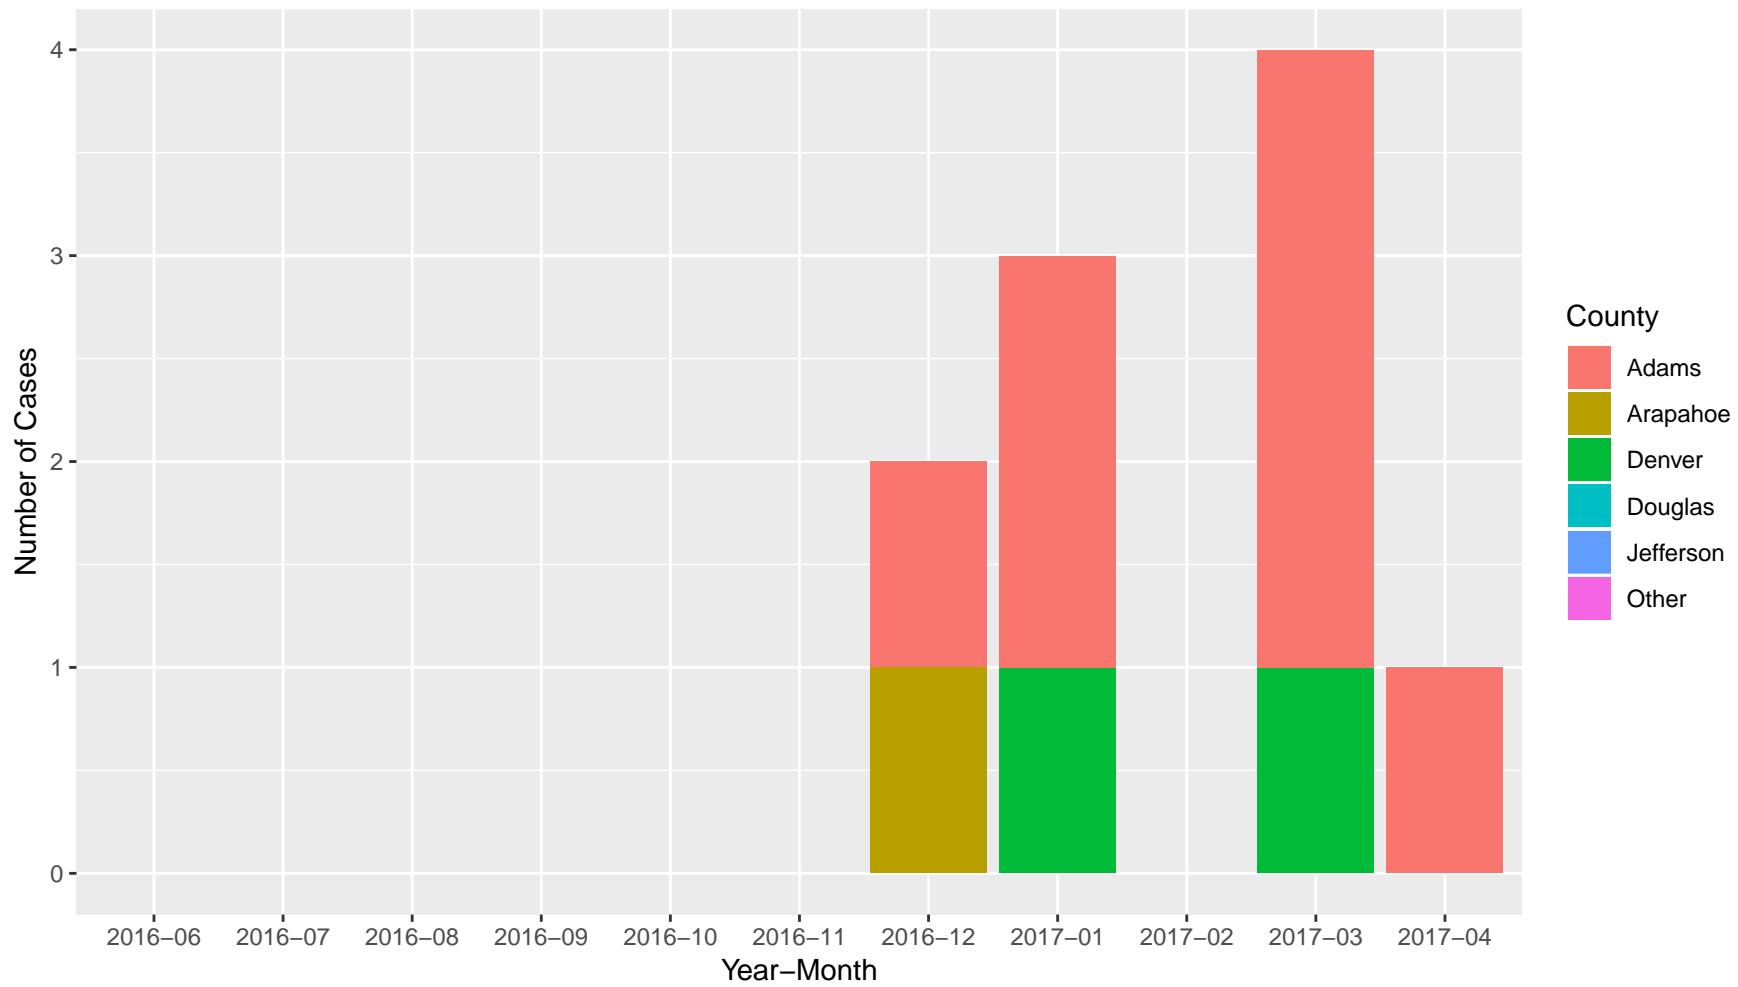

# emm12\_Cluster17

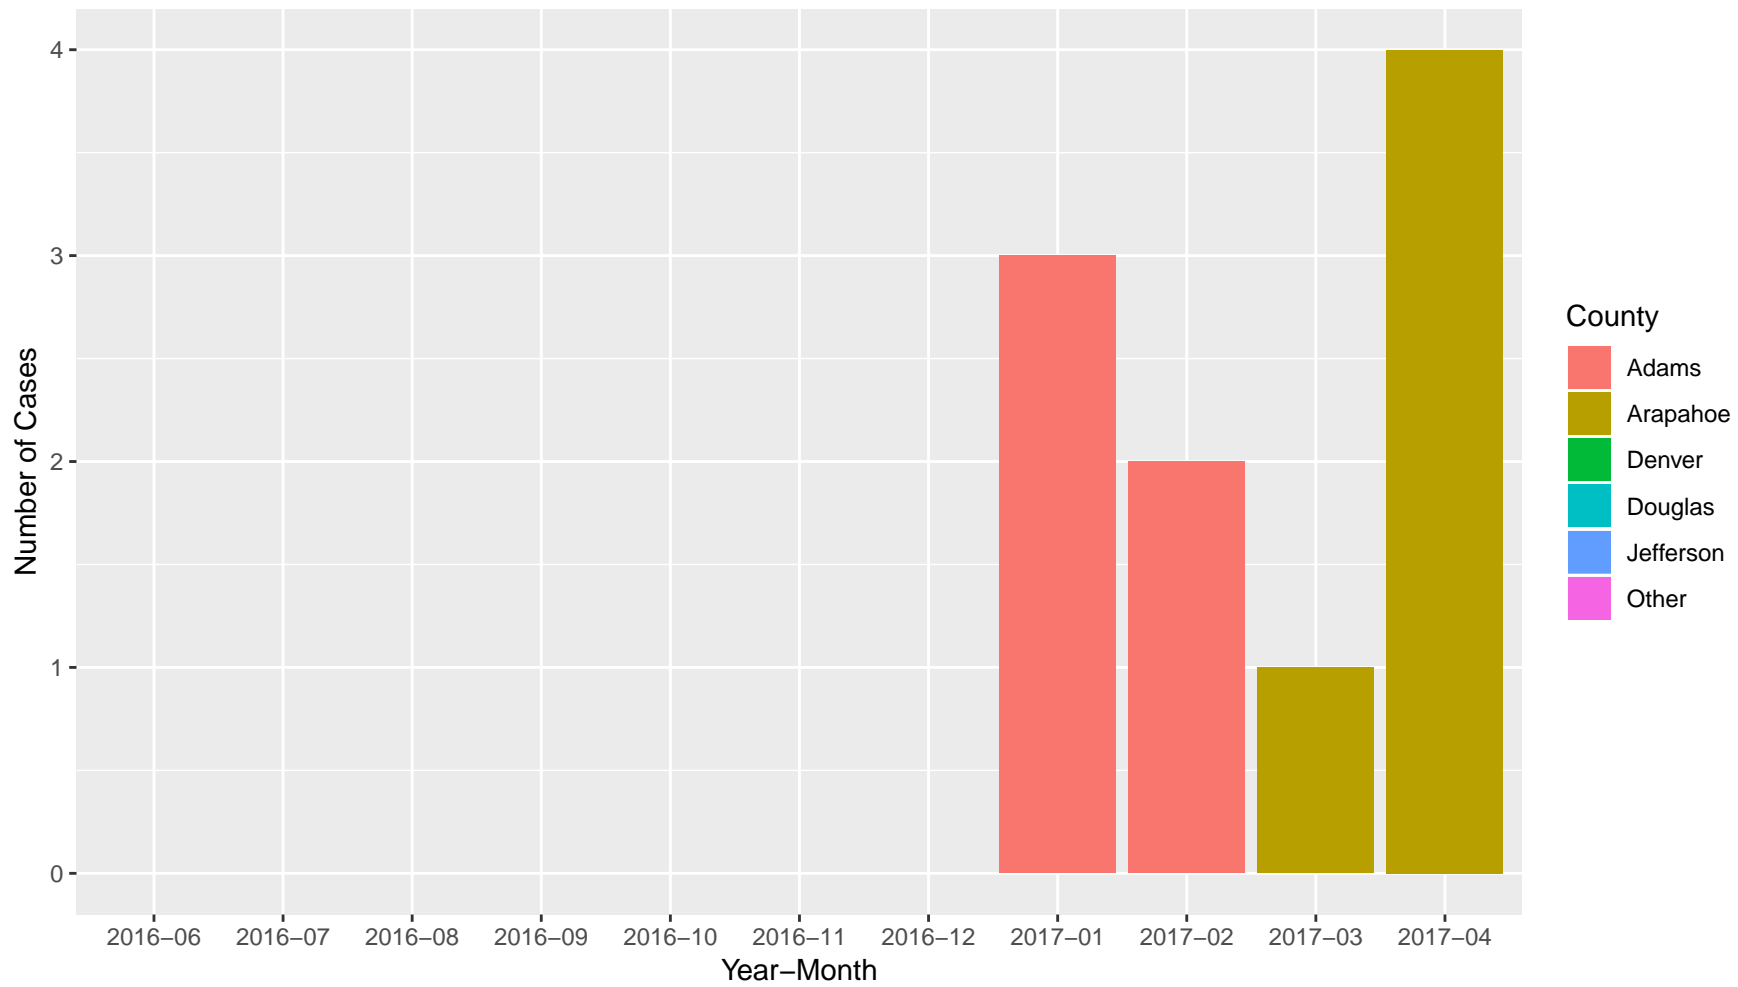

*emm87\_Cluster8*

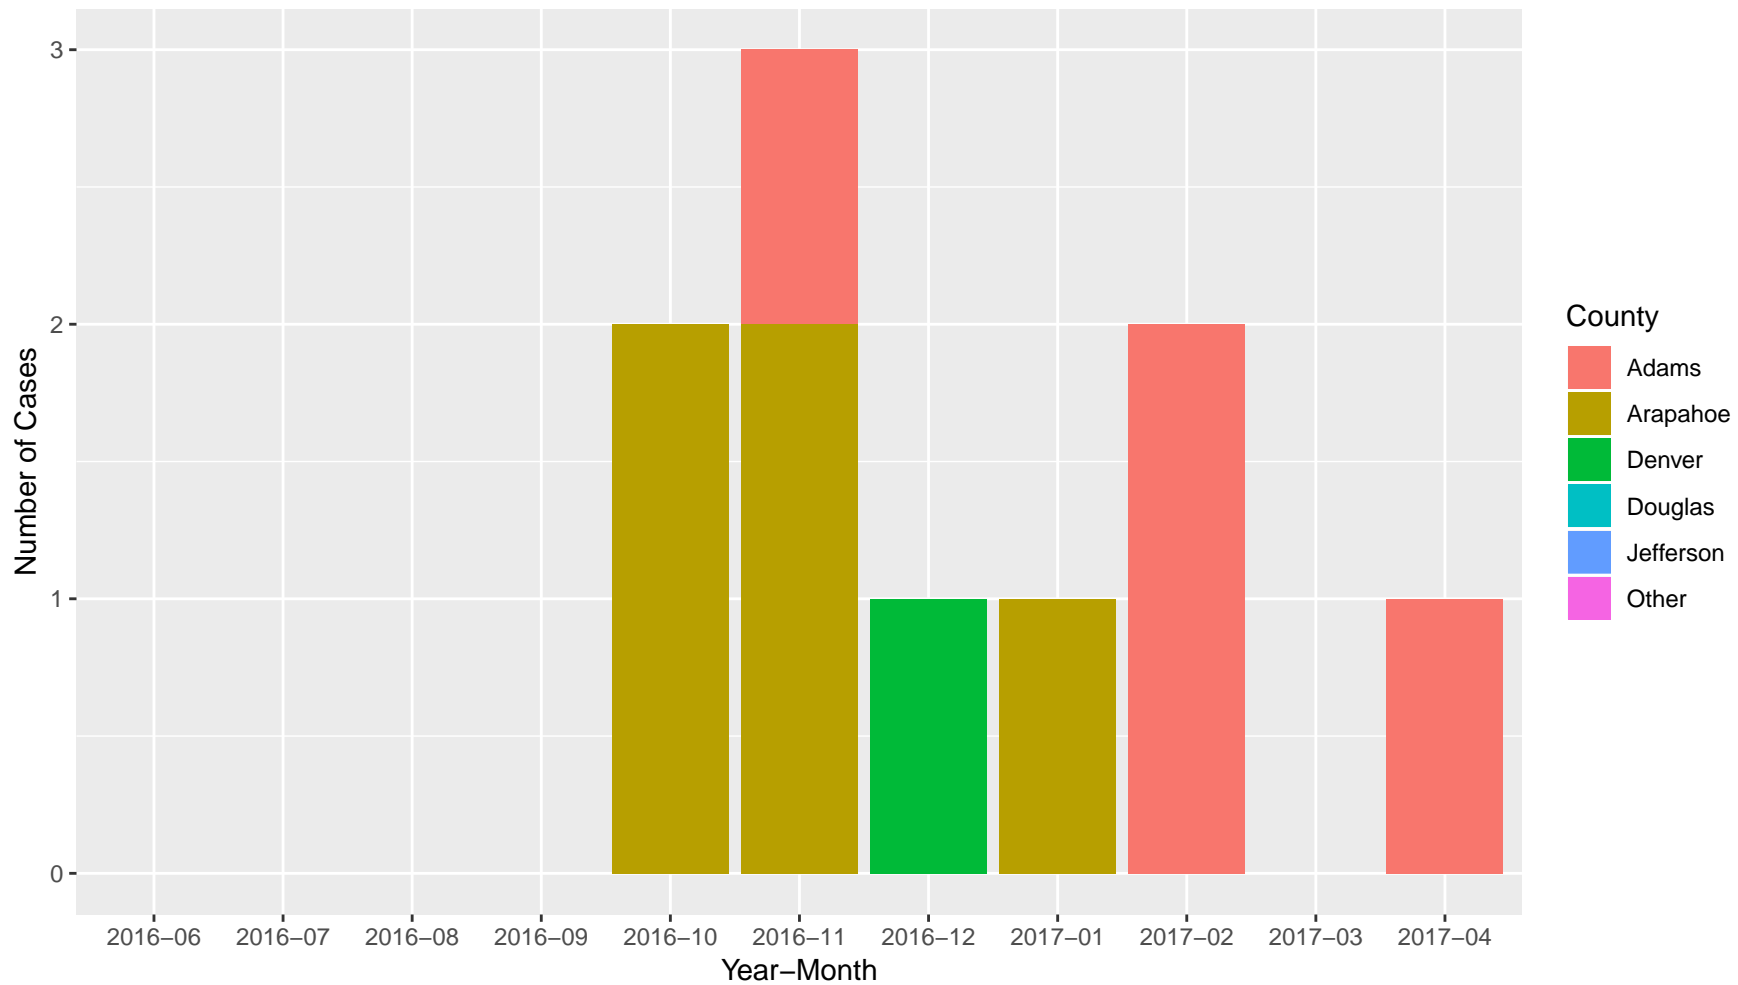



*emm89\_Cluster26*

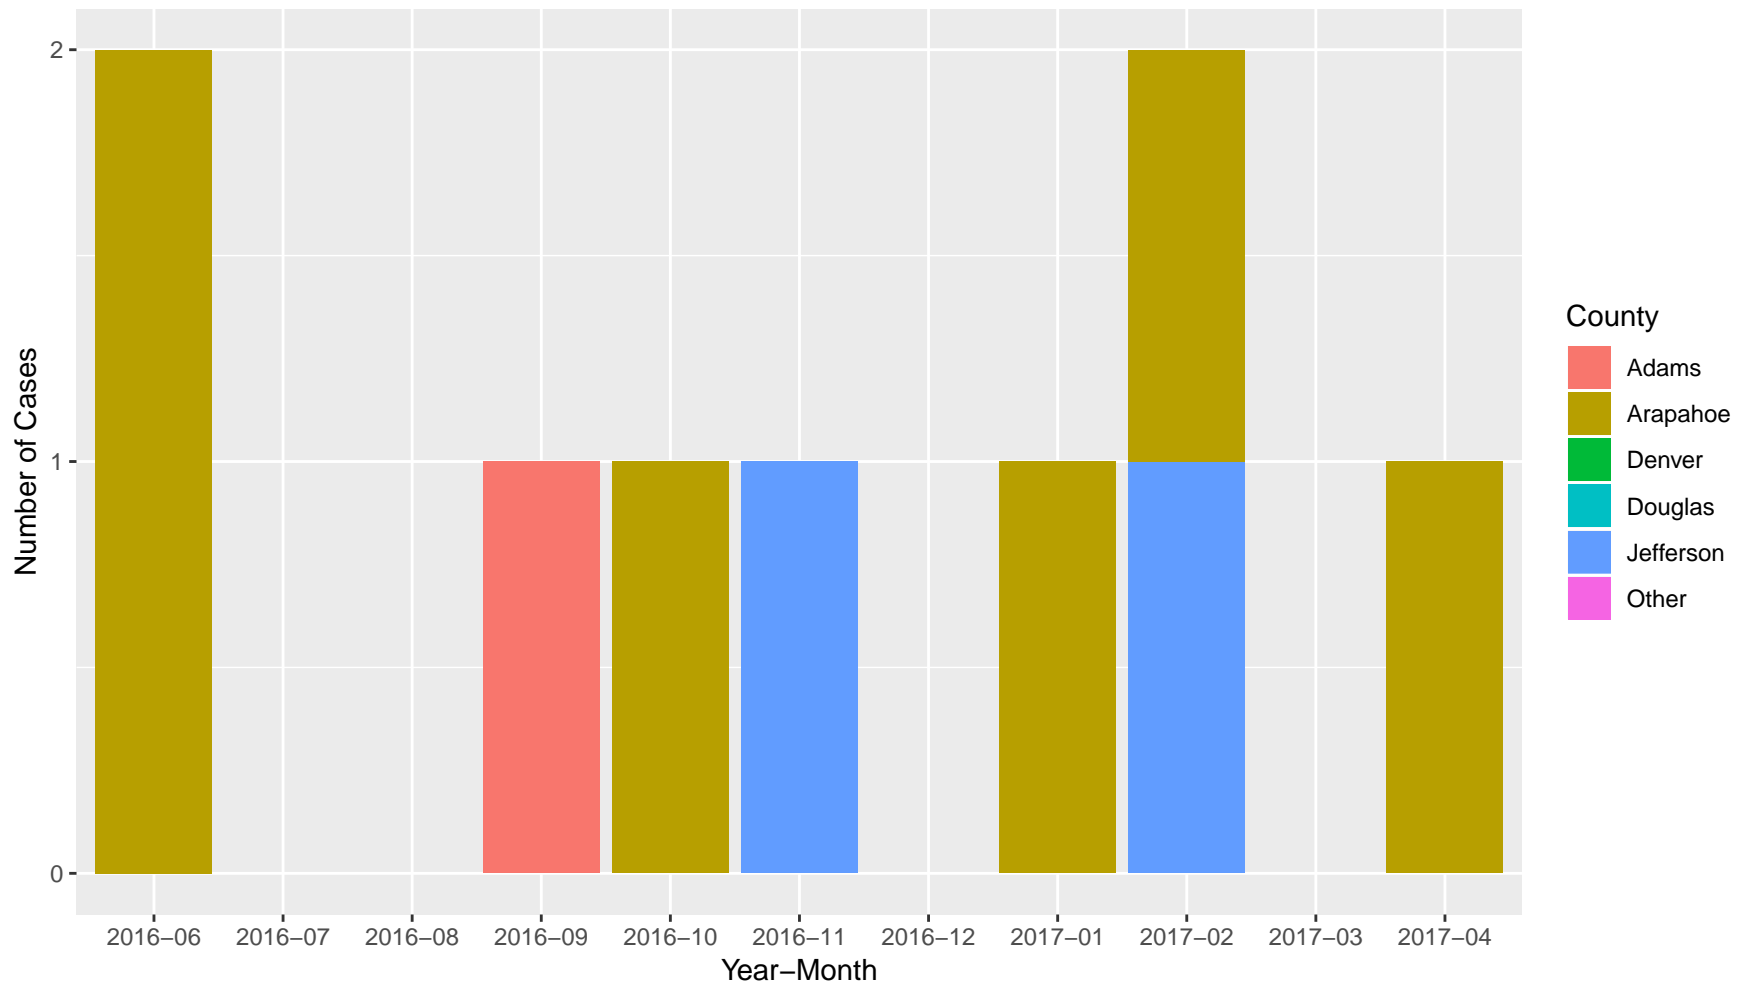

emm12\_Cluster8

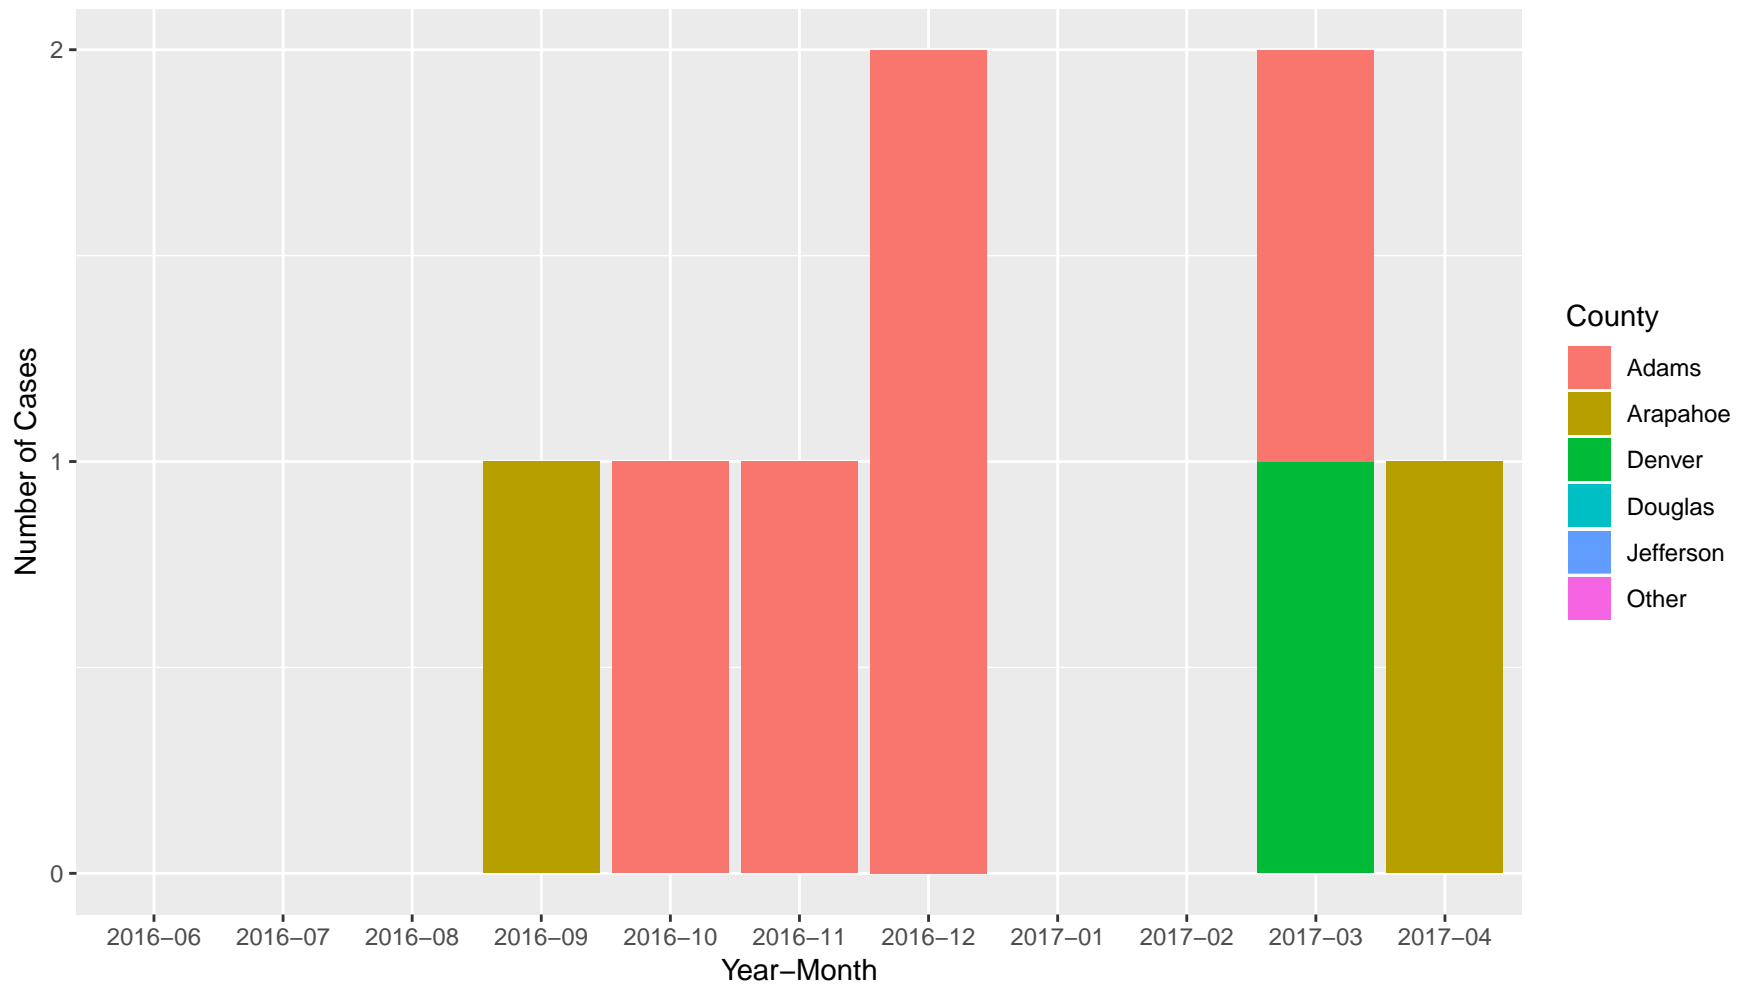

*emm4\_Cluster4*

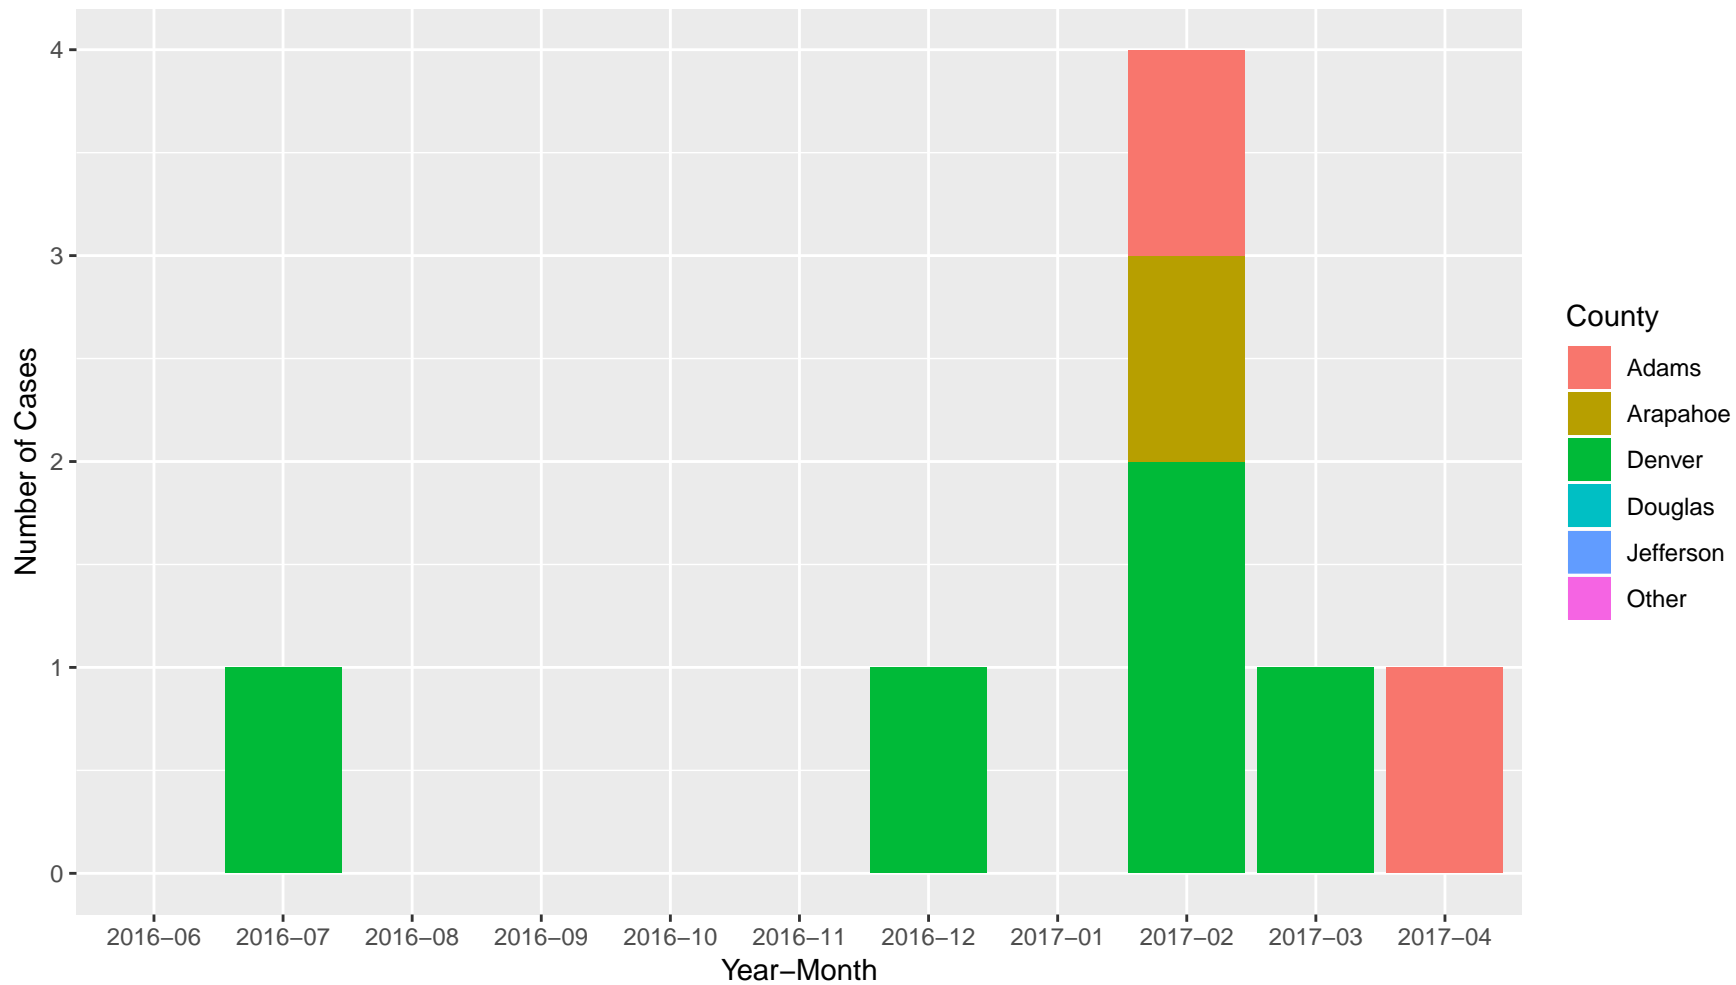

# emm4\_Cluster5

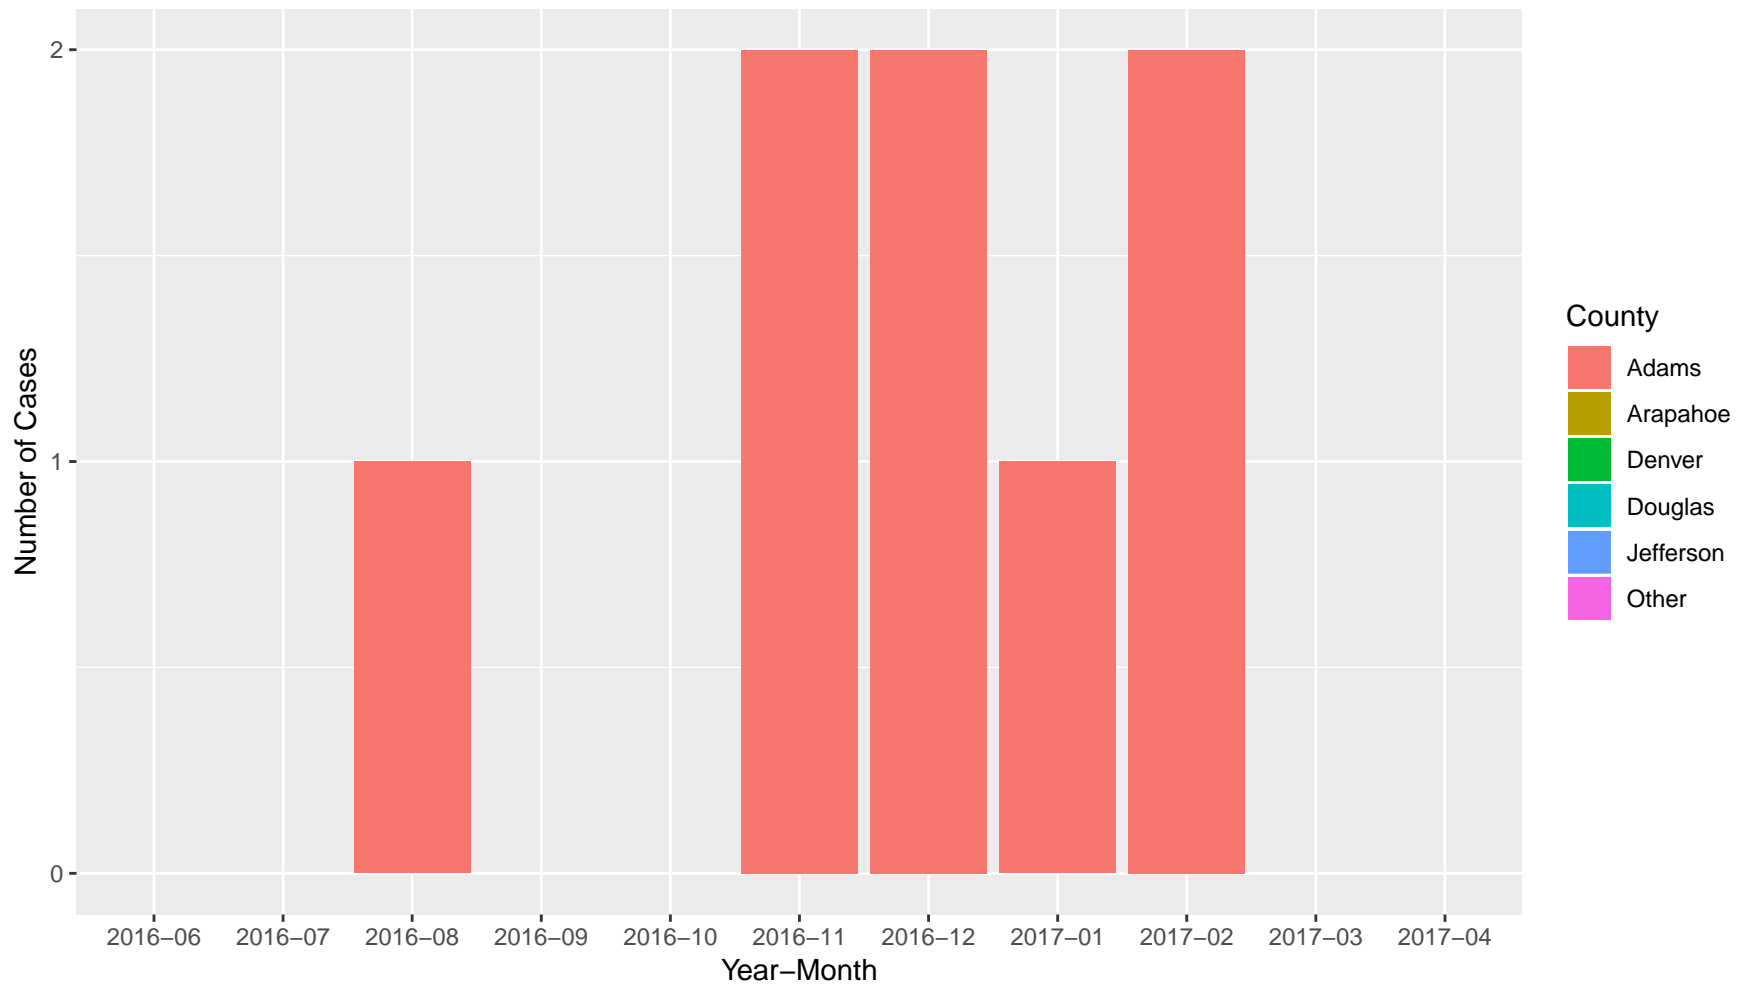

# emm89\_Cluster27

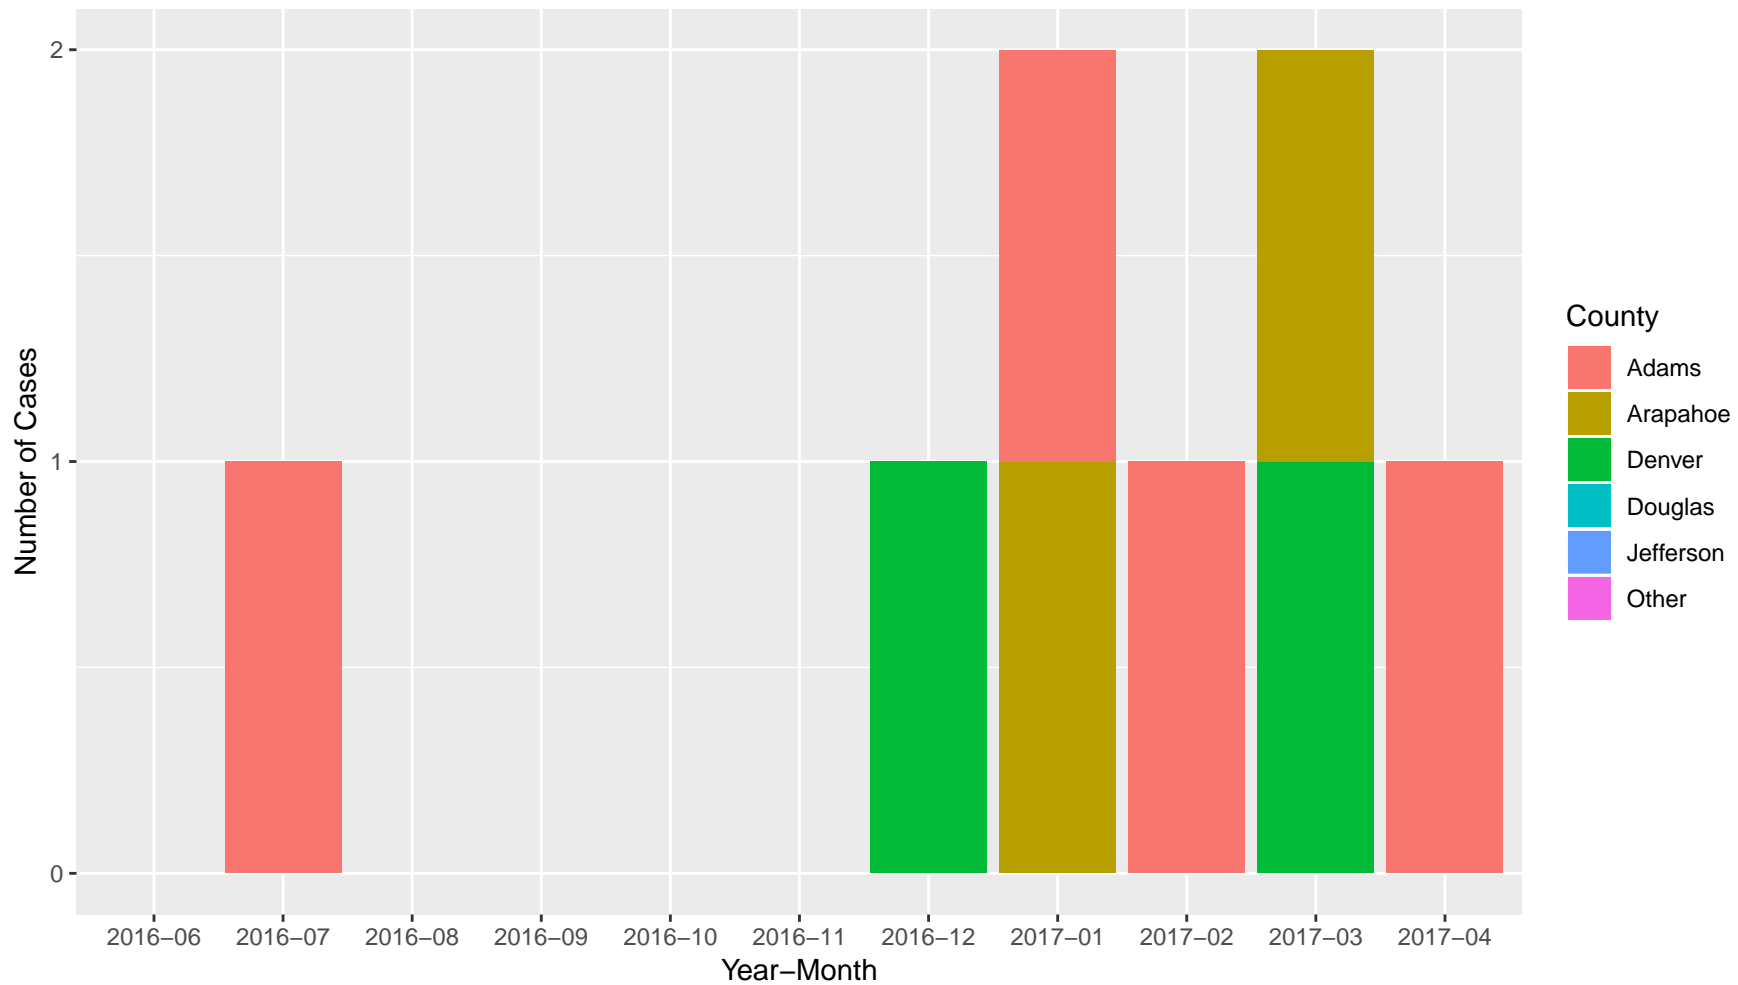

# emm4\_Cluster3

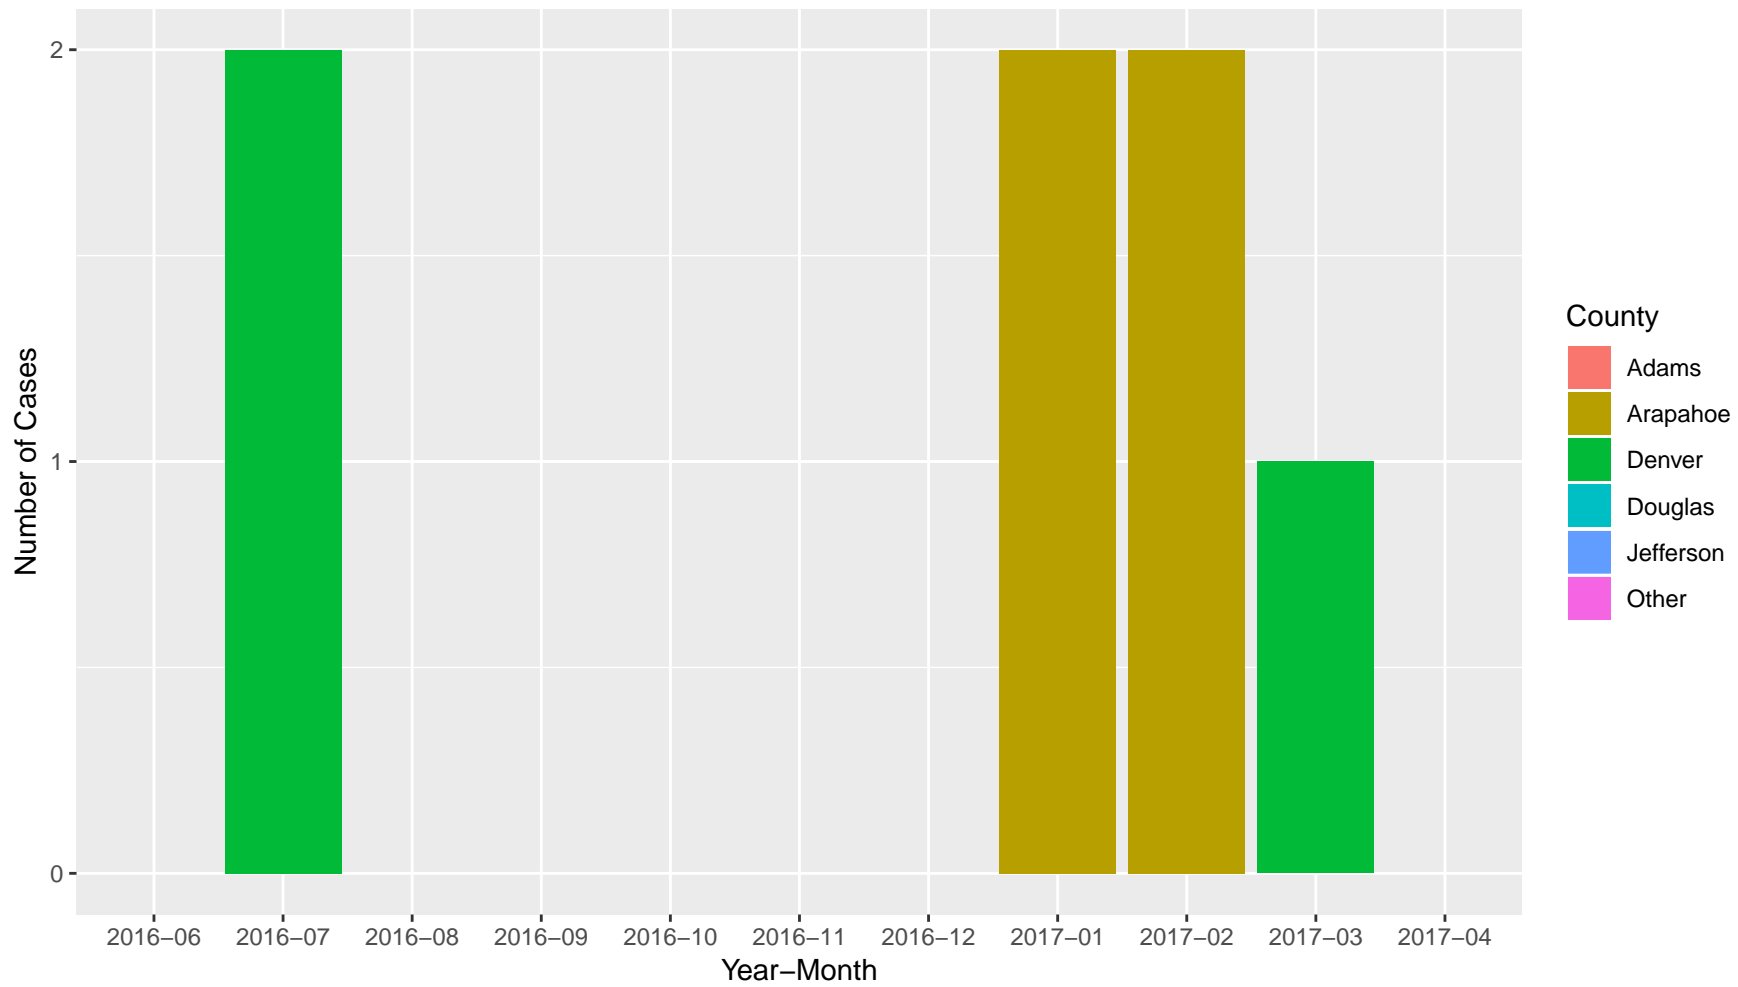

# emm6\_Cluster3

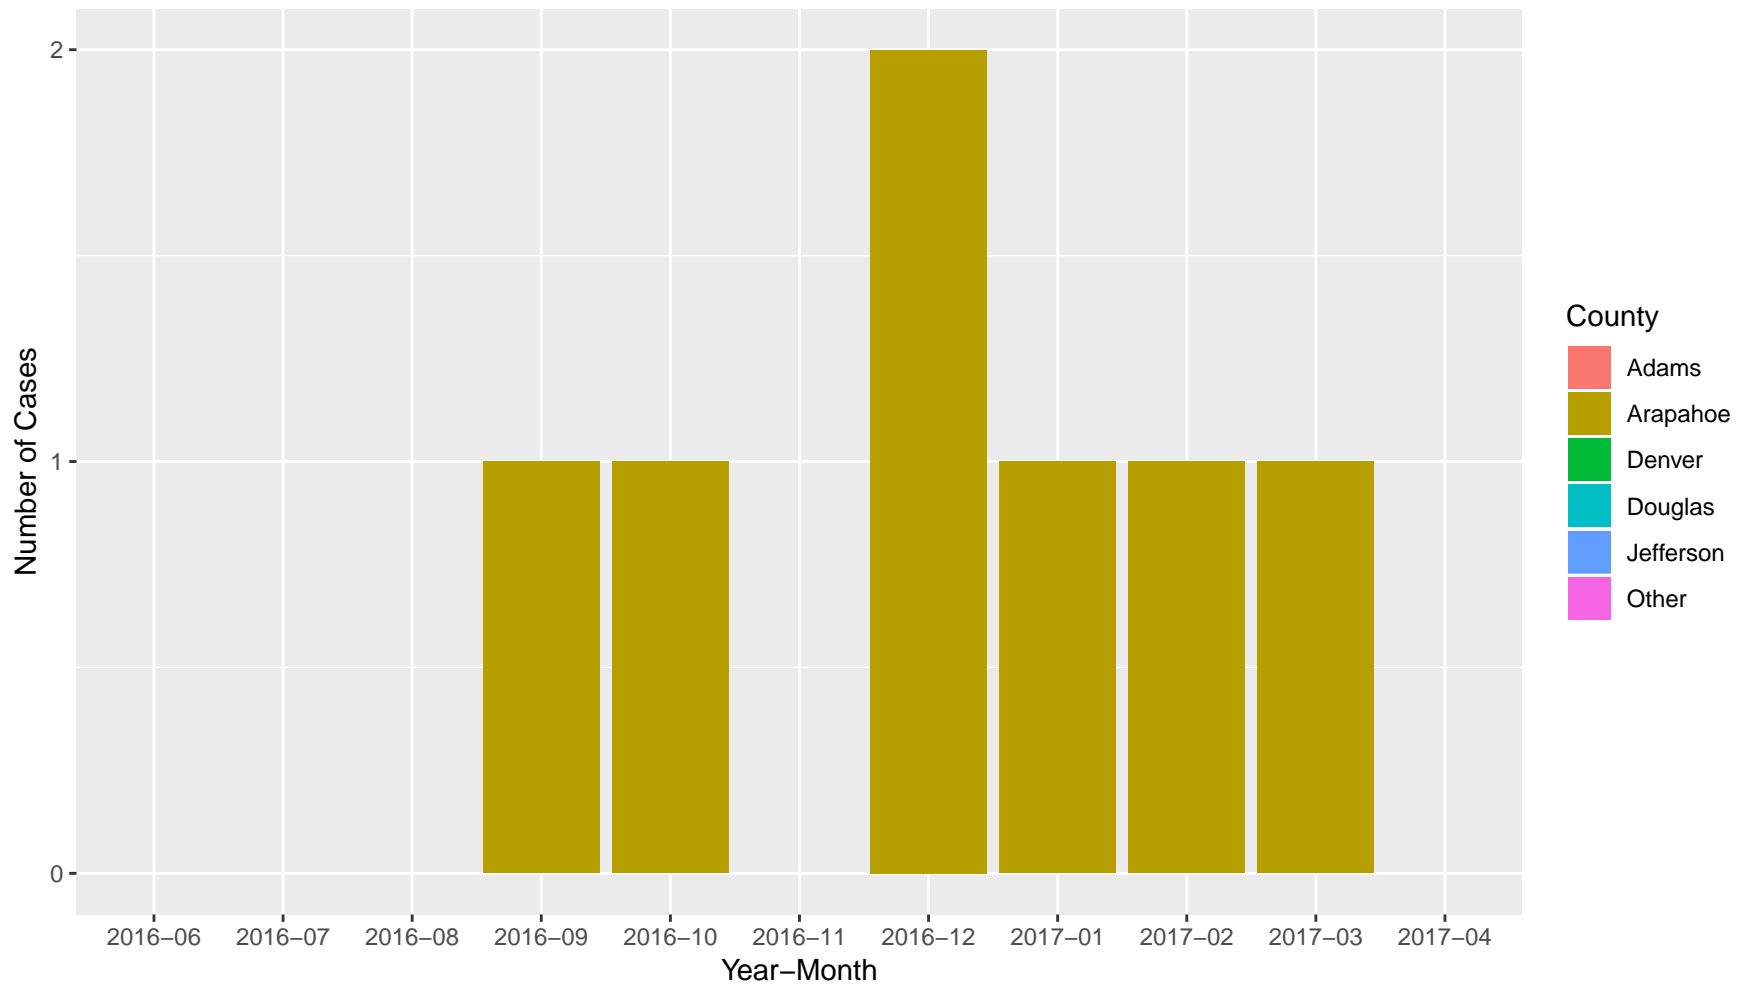

*emm76\_Cluster1*

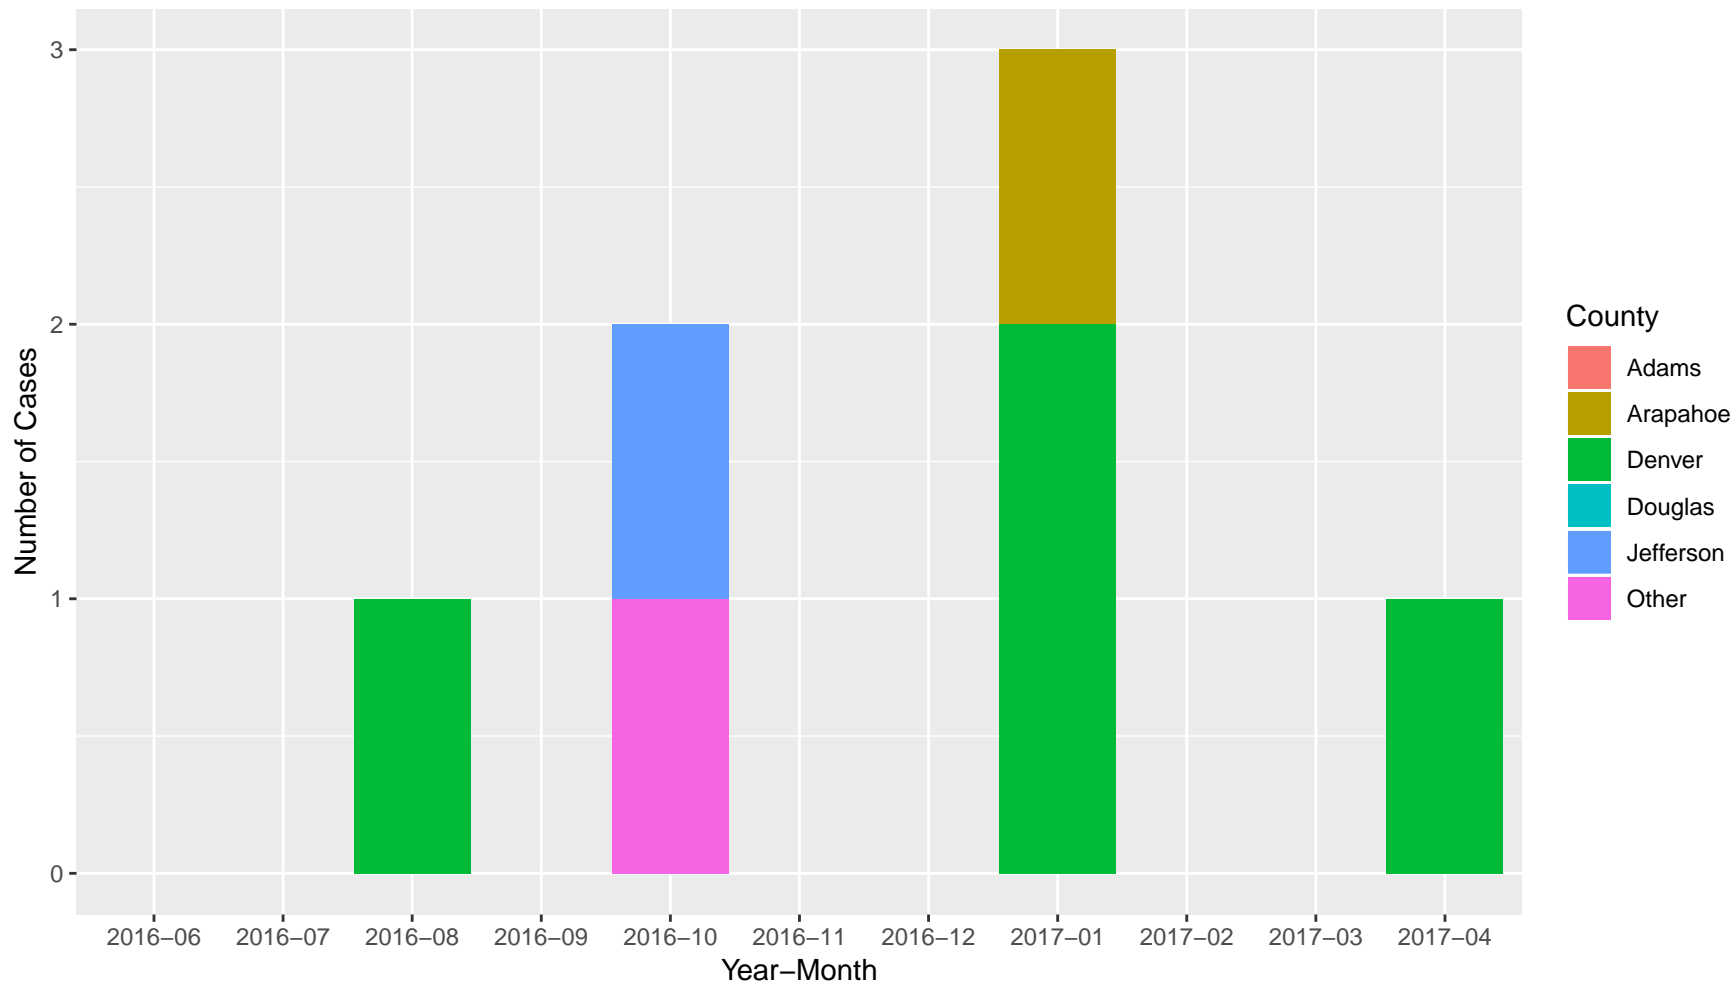



*emm82\_Cluster12*

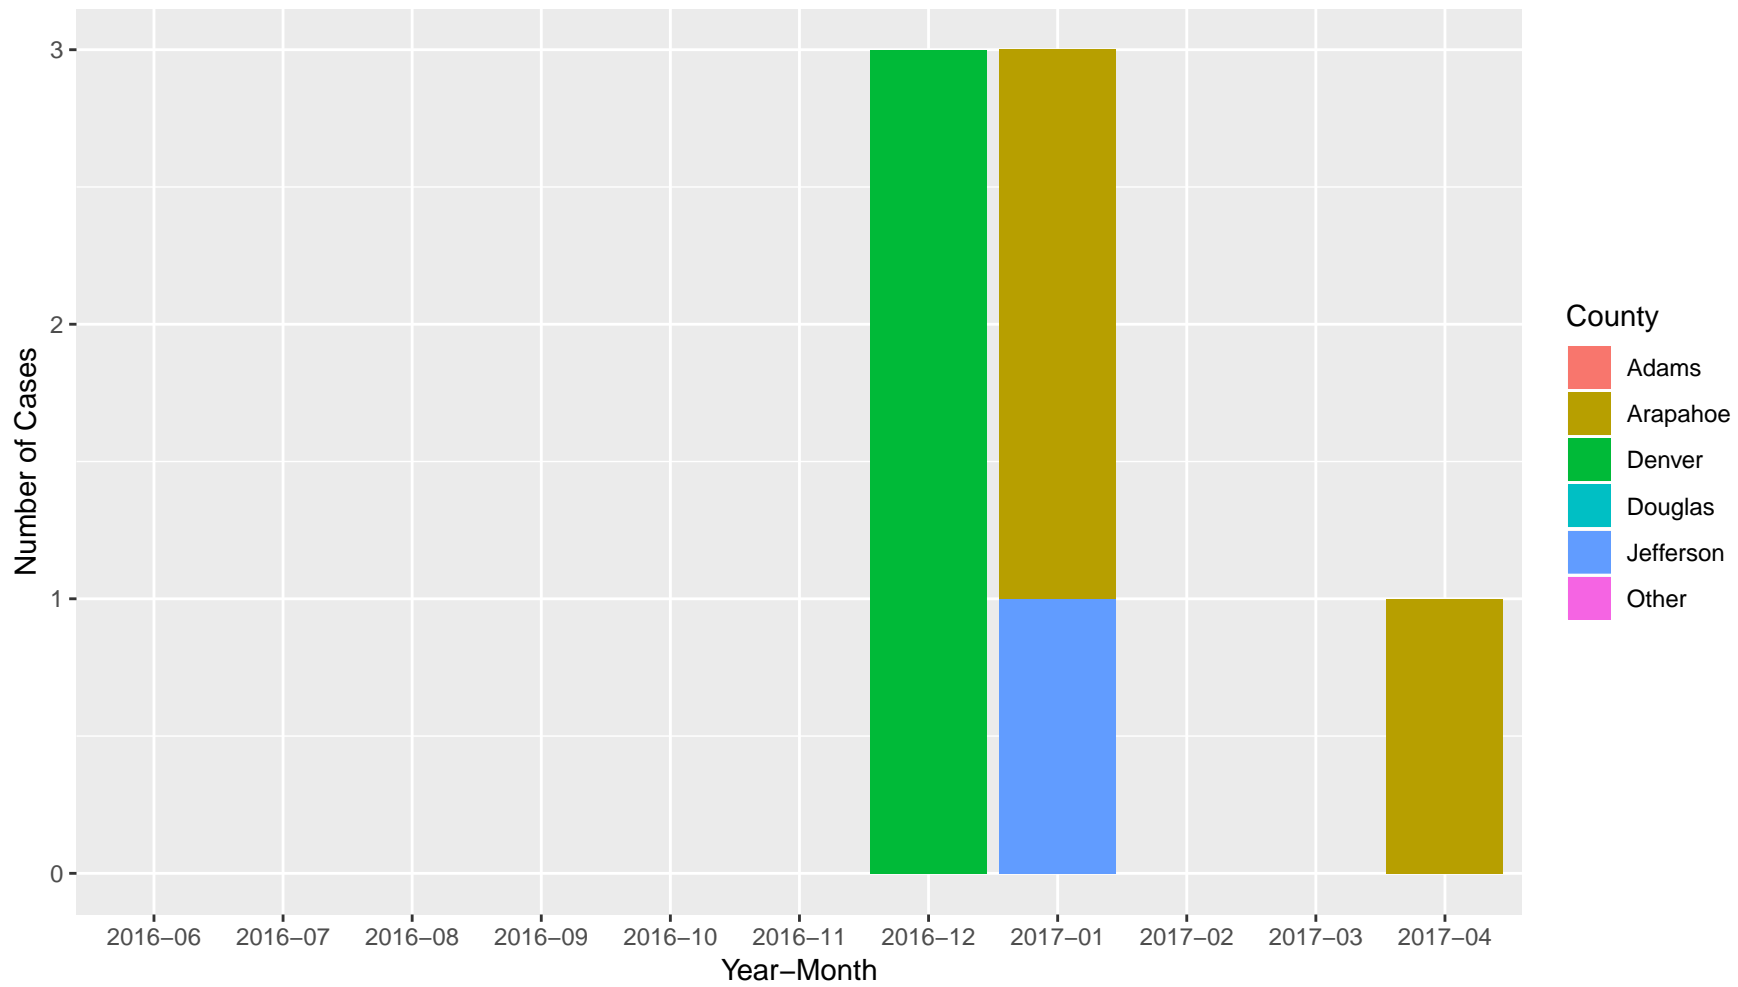

# emm82\_Cluster5

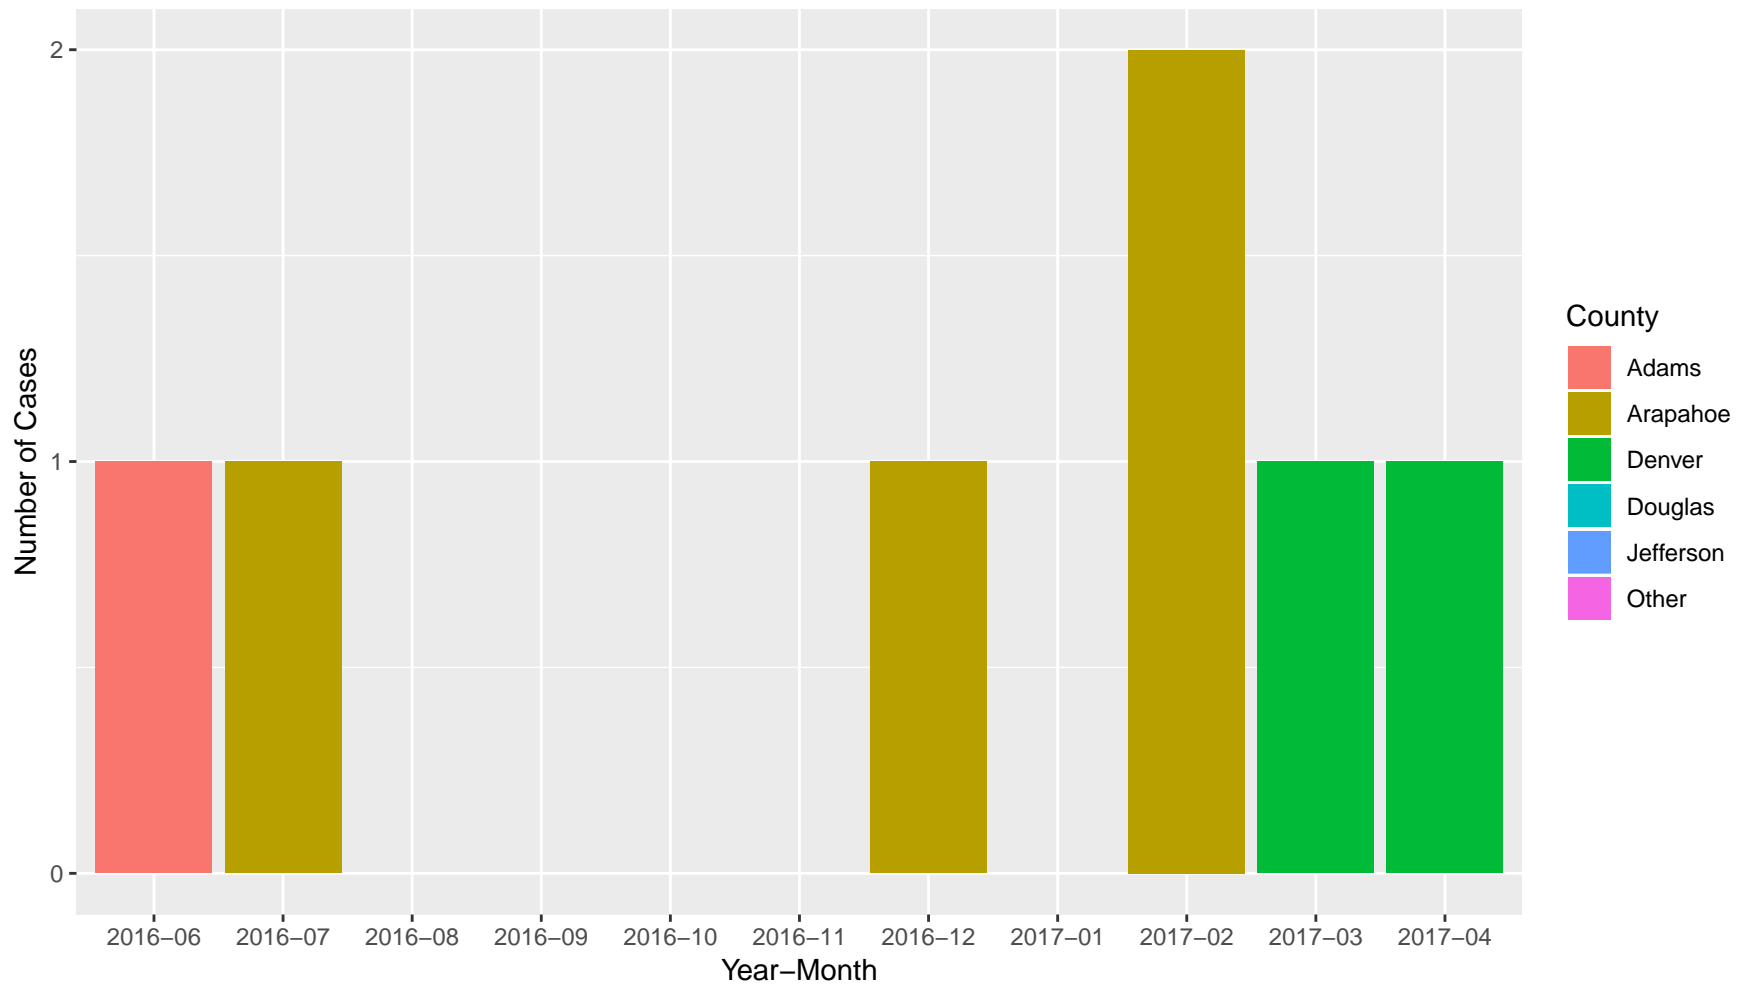

*emm12\_Cluster4*

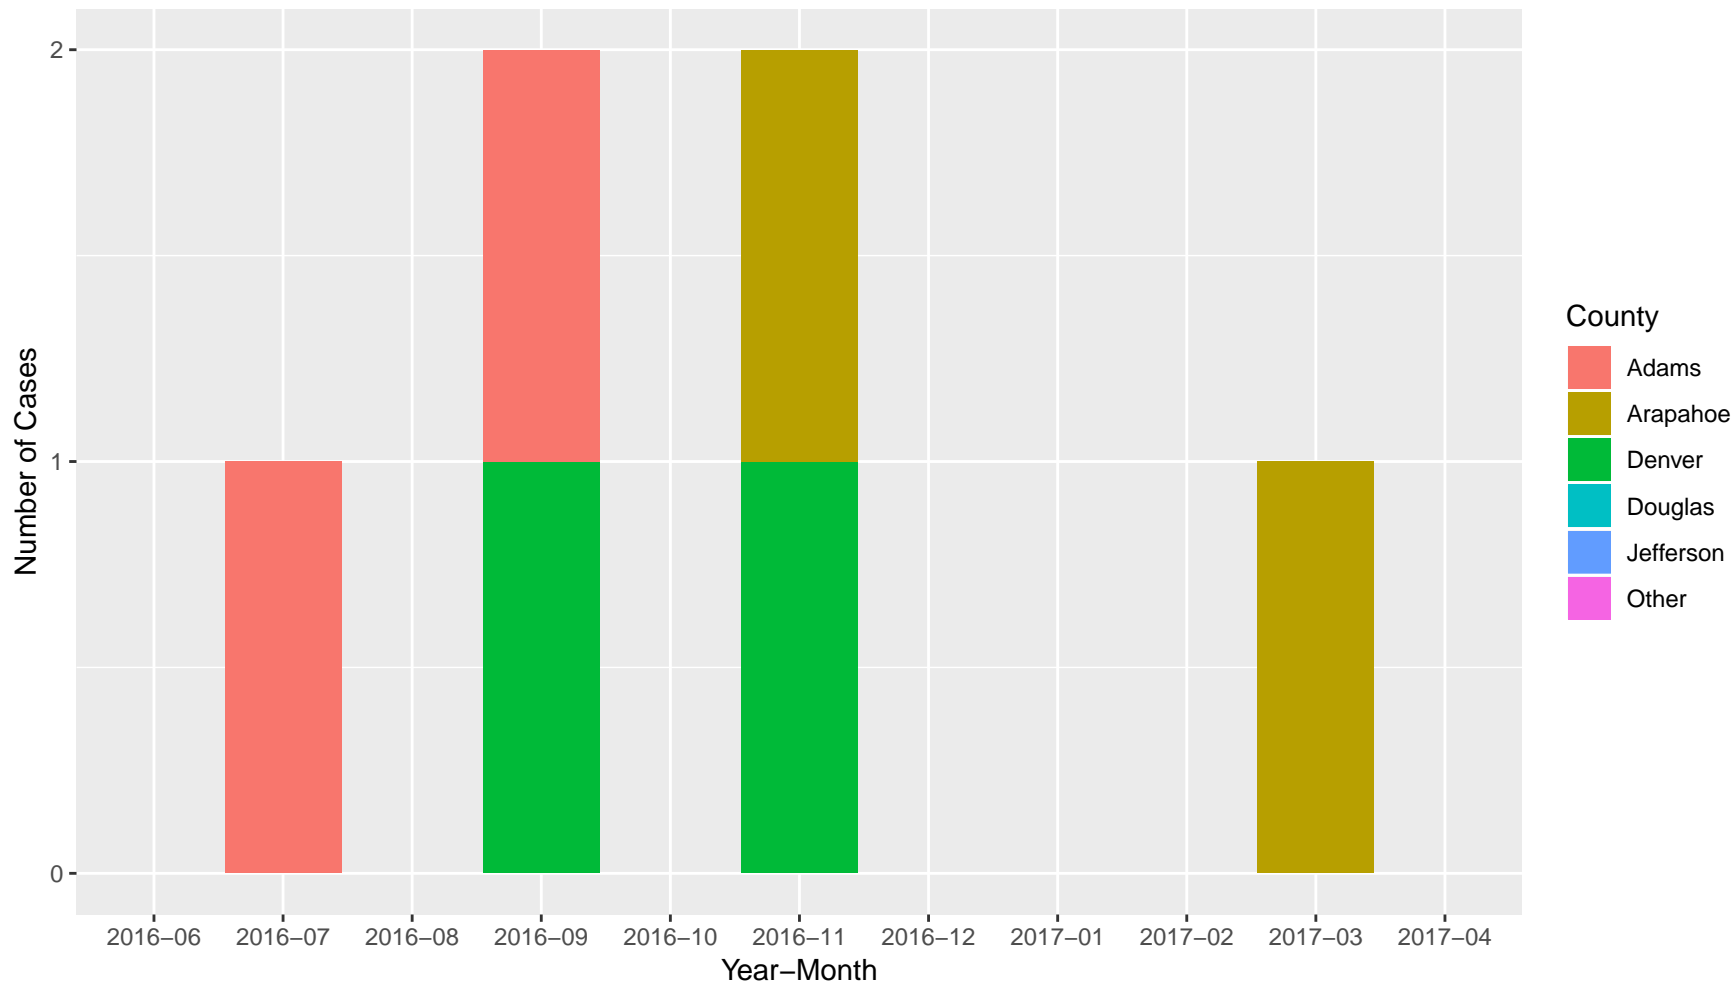

emm12\_Cluster5

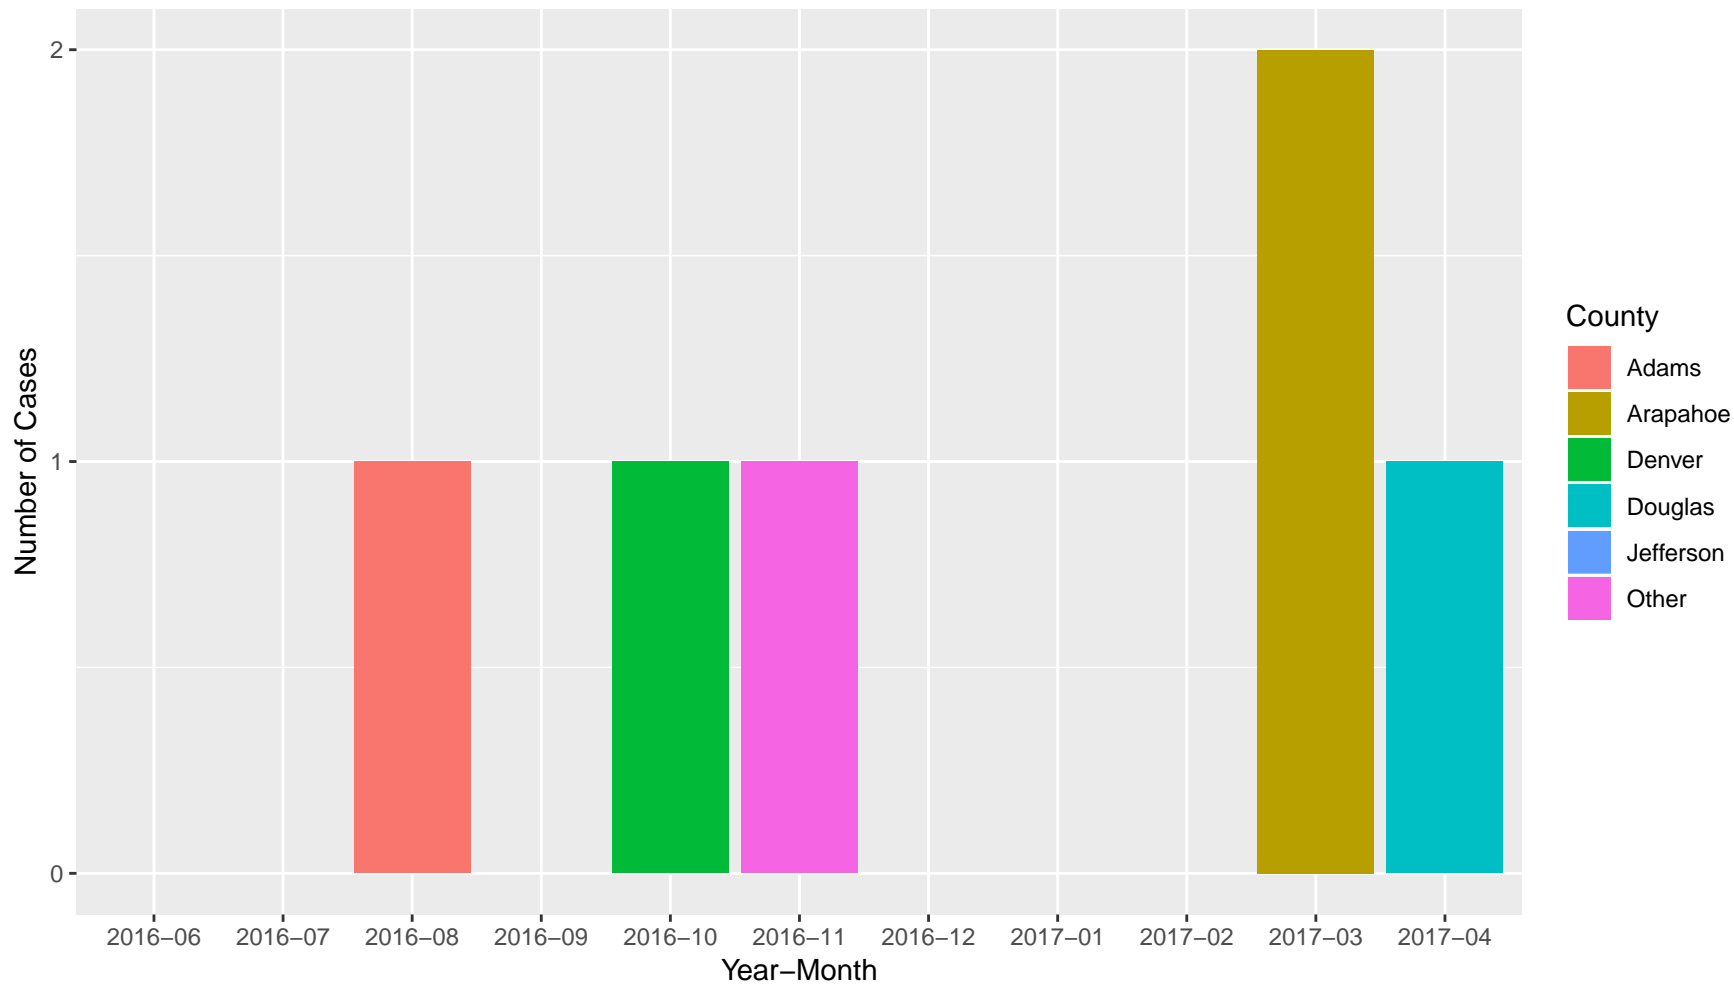

*emm11\_Cluster6*

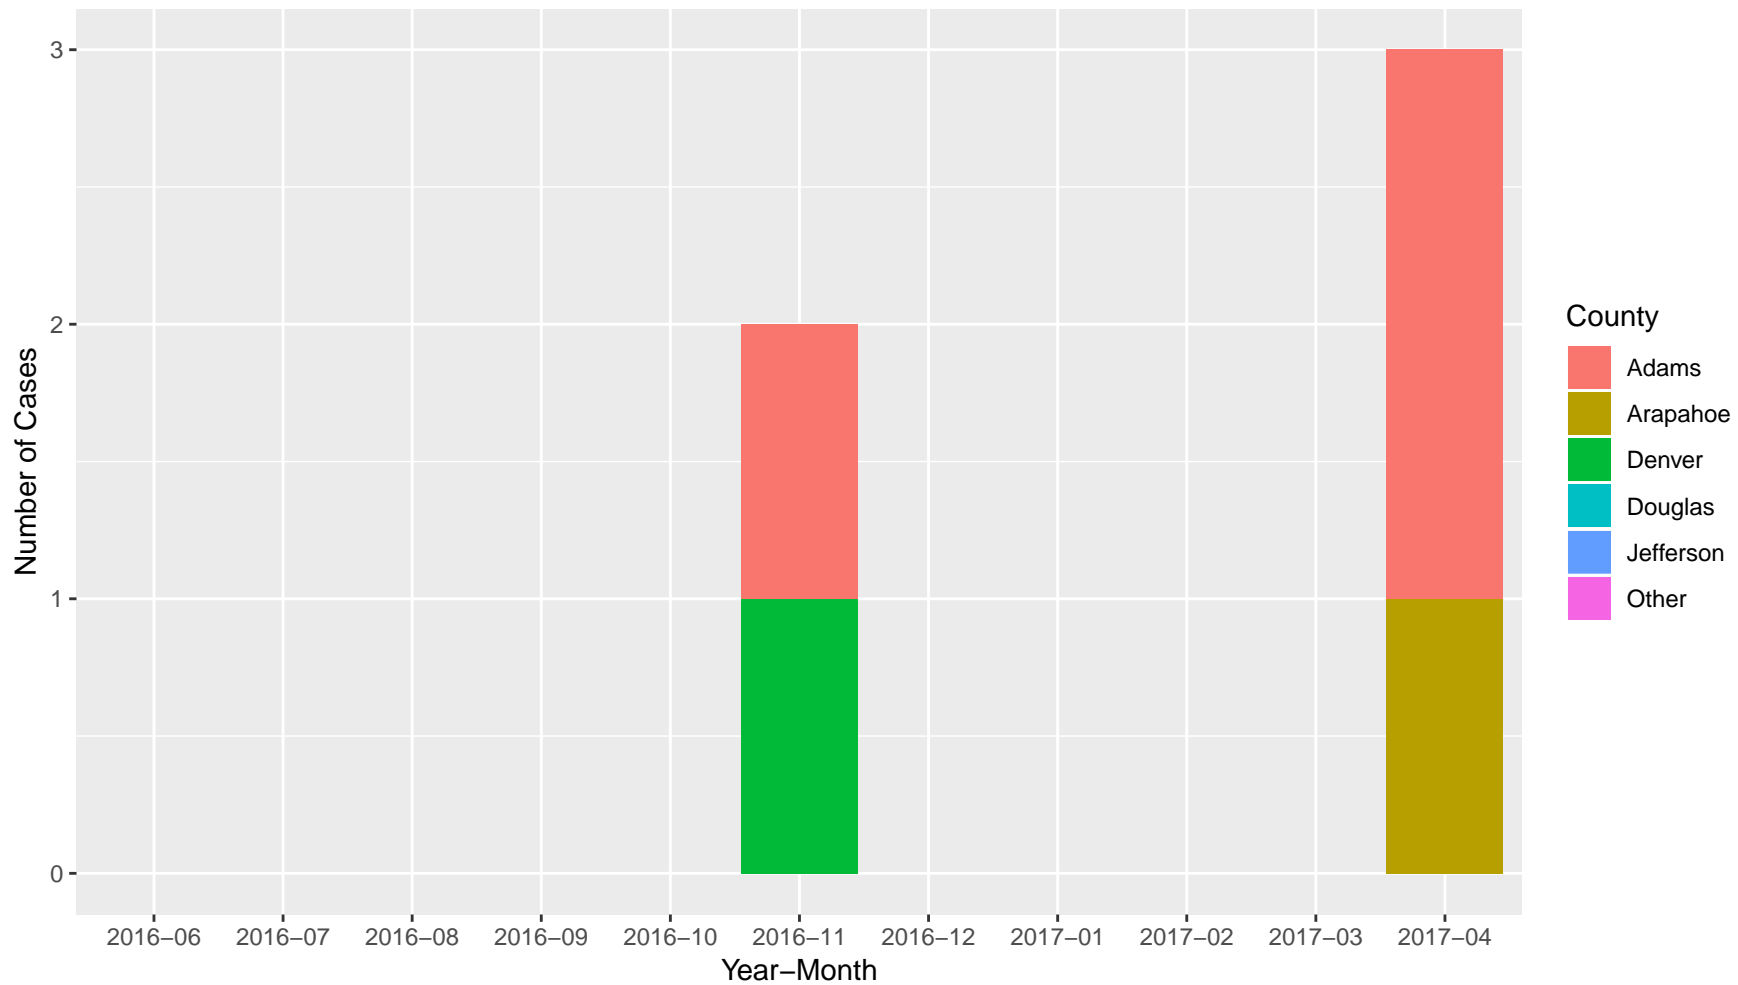

# emm12\_Cluster11

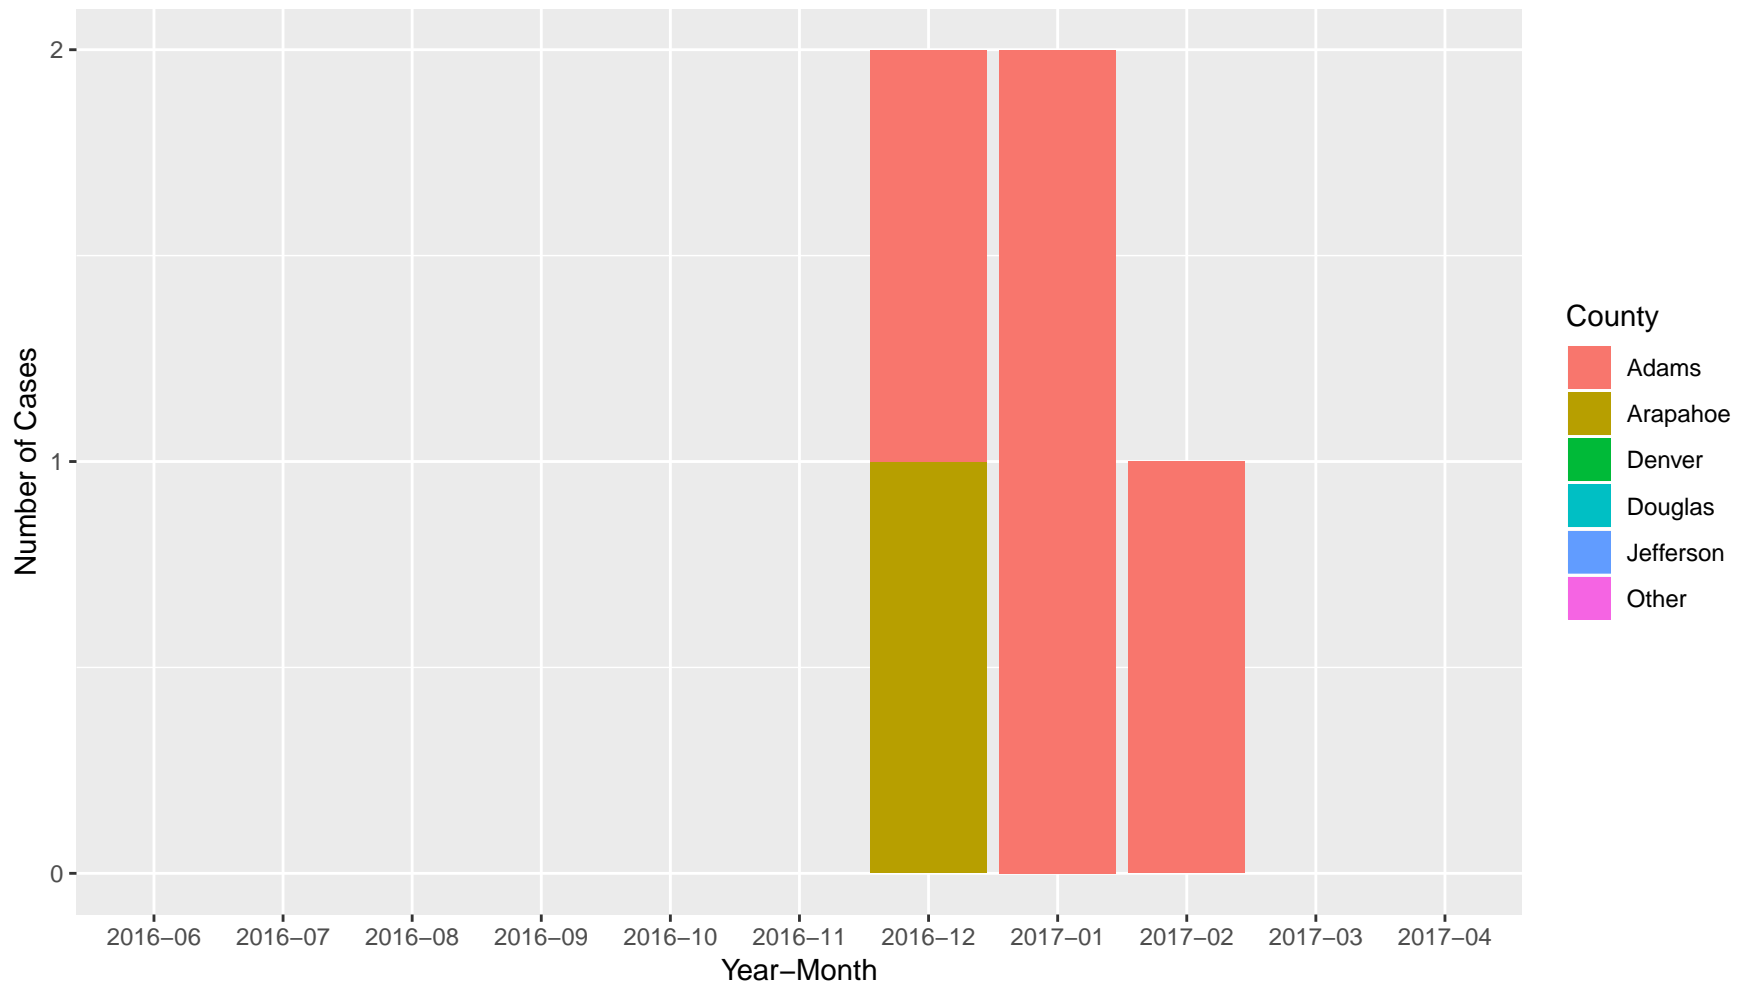

*emm28\_Cluster14*

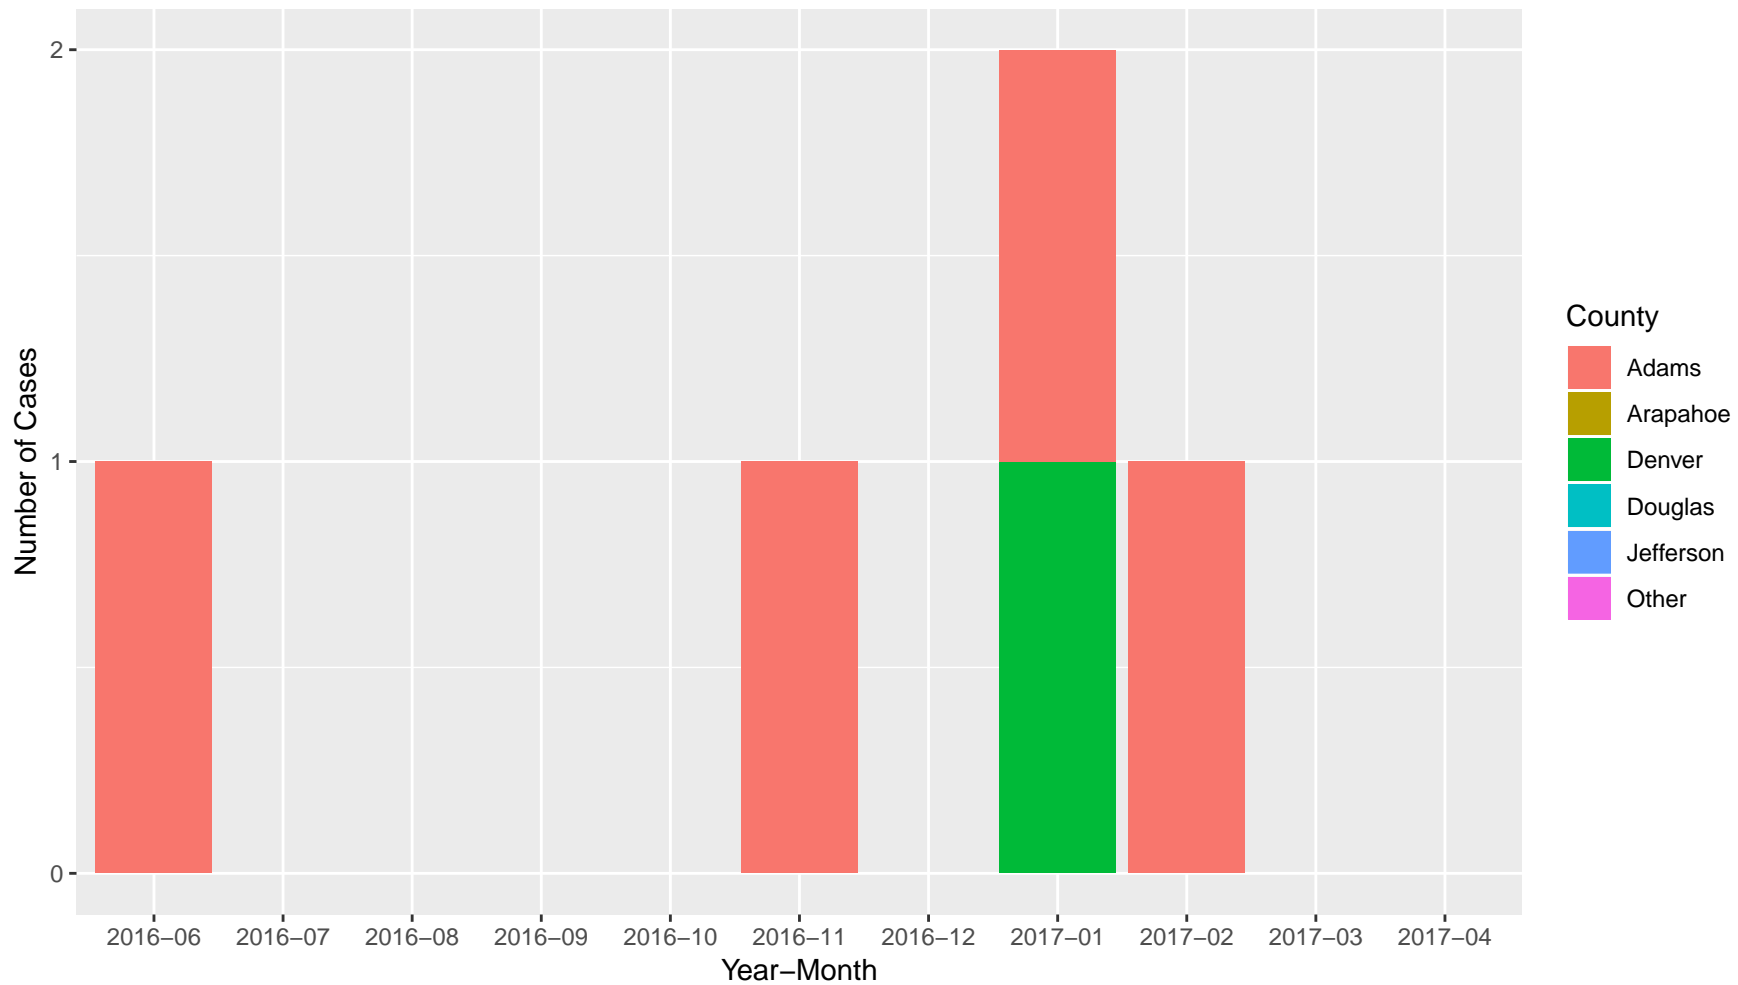

# emm3\_Cluster7

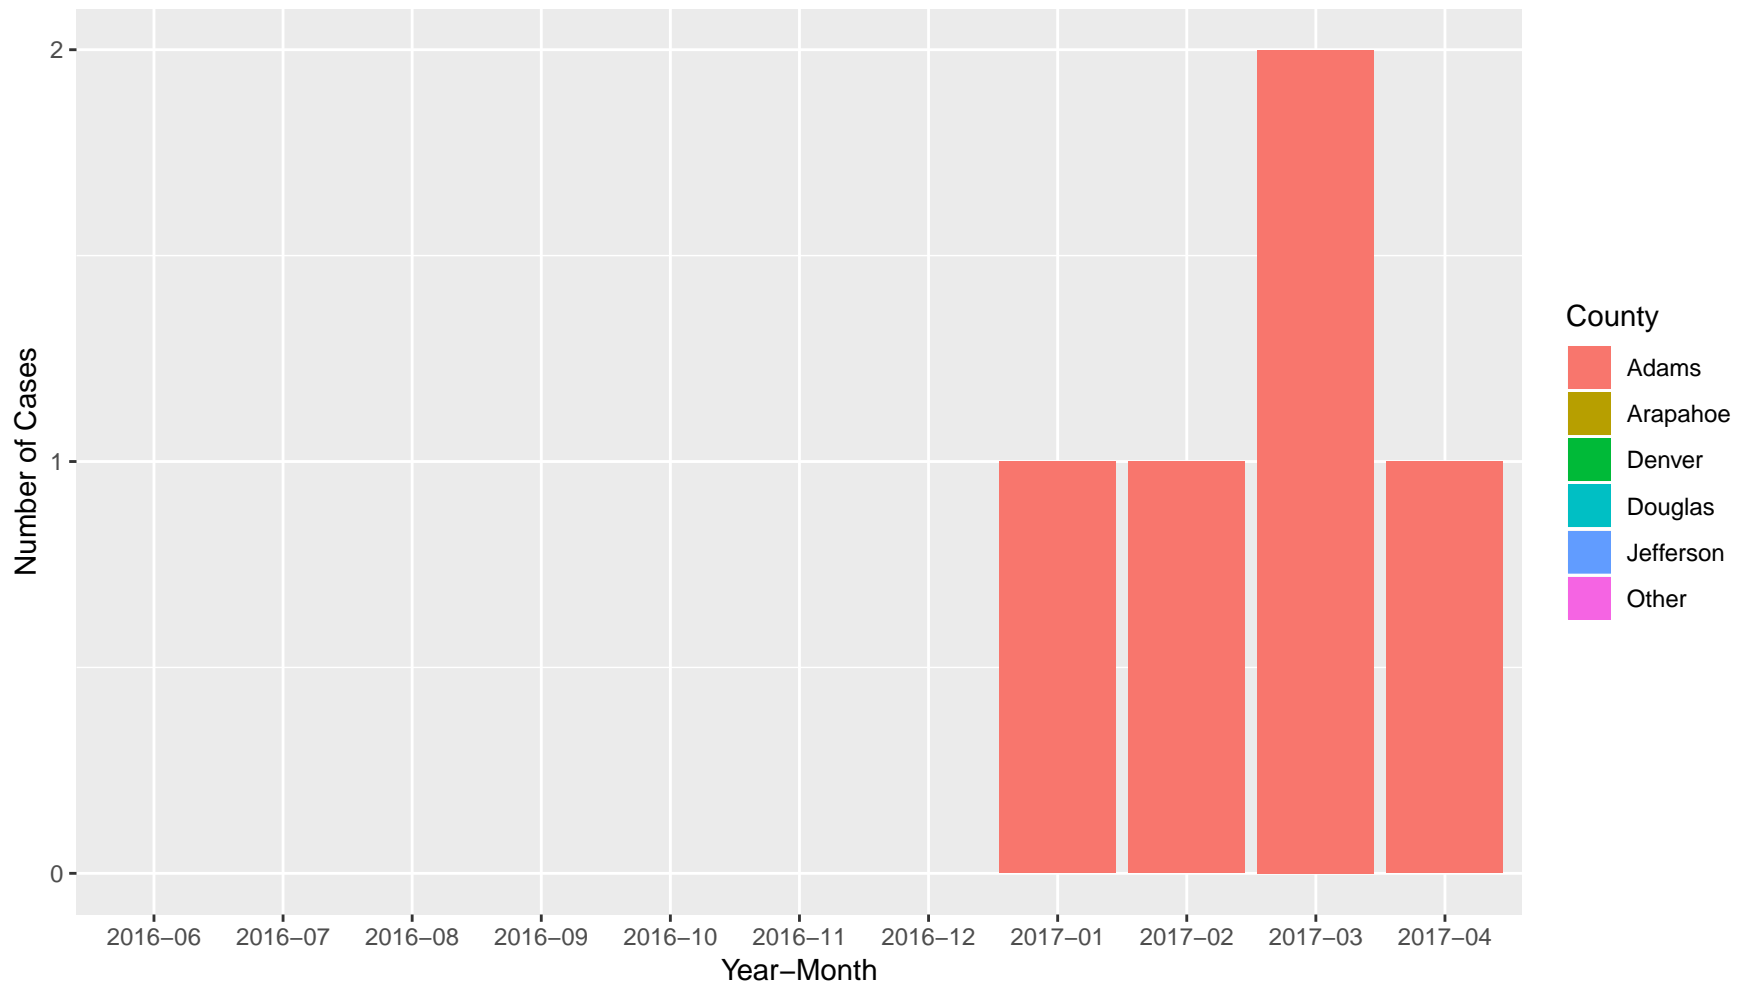



# emm4\_Cluster15

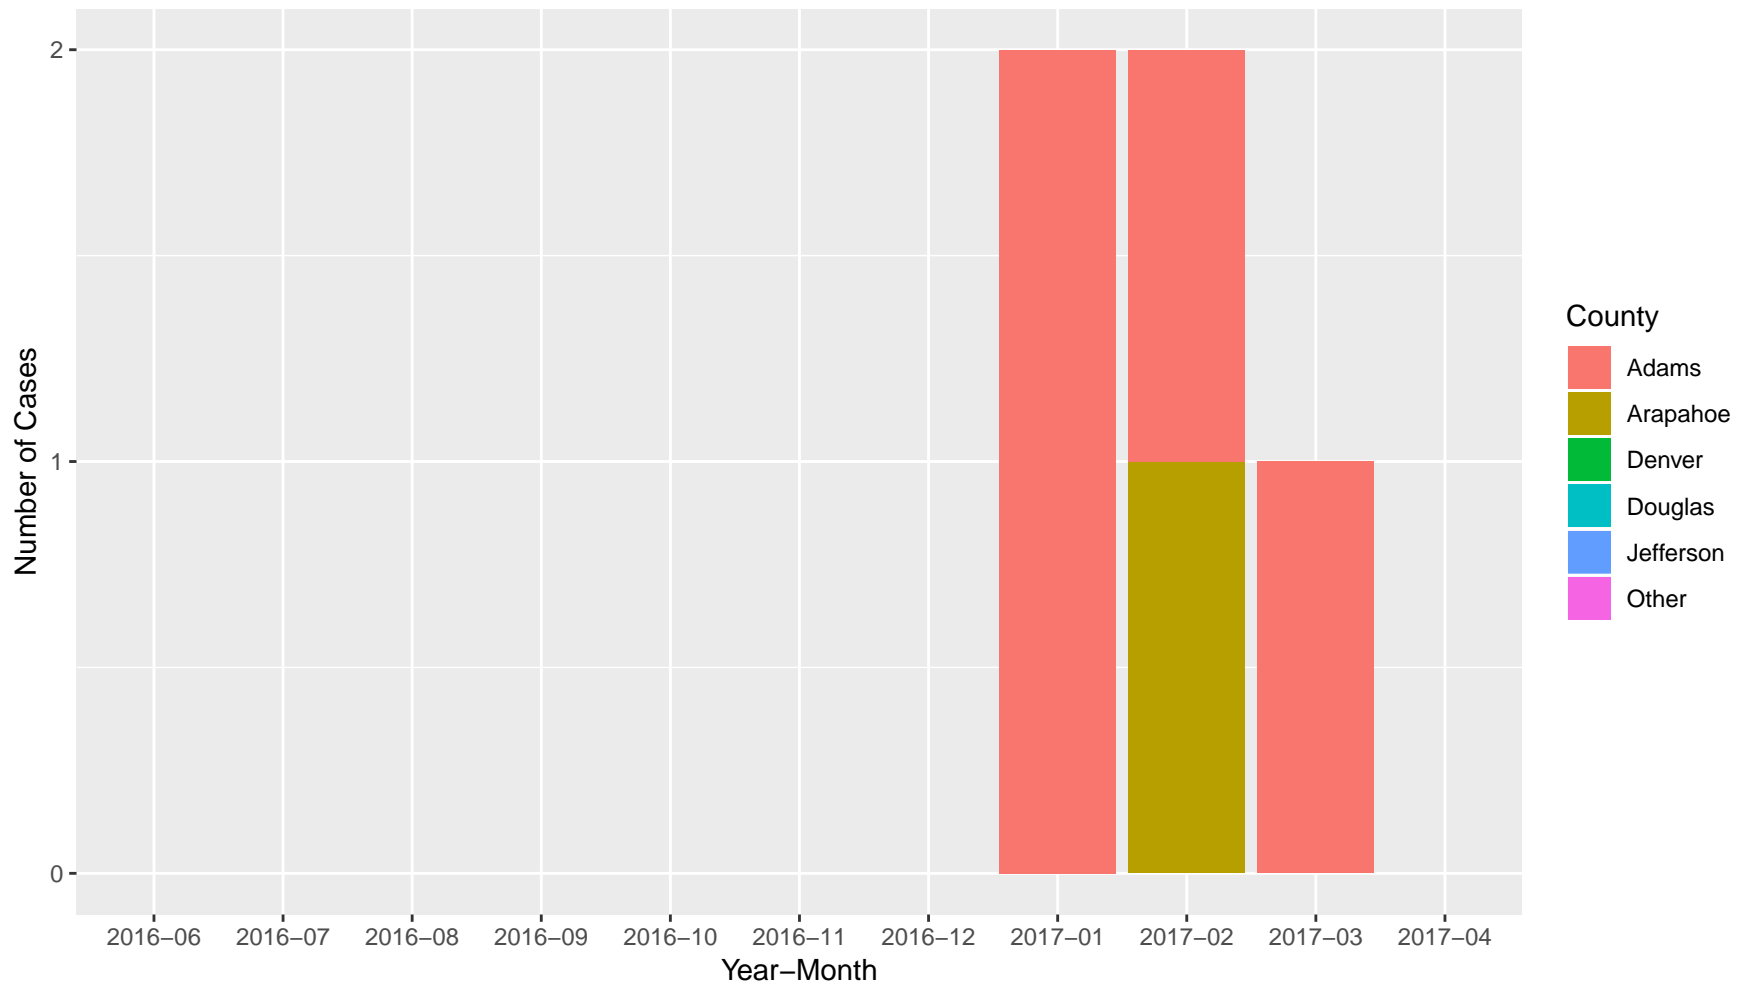

# emm75\_Cluster2

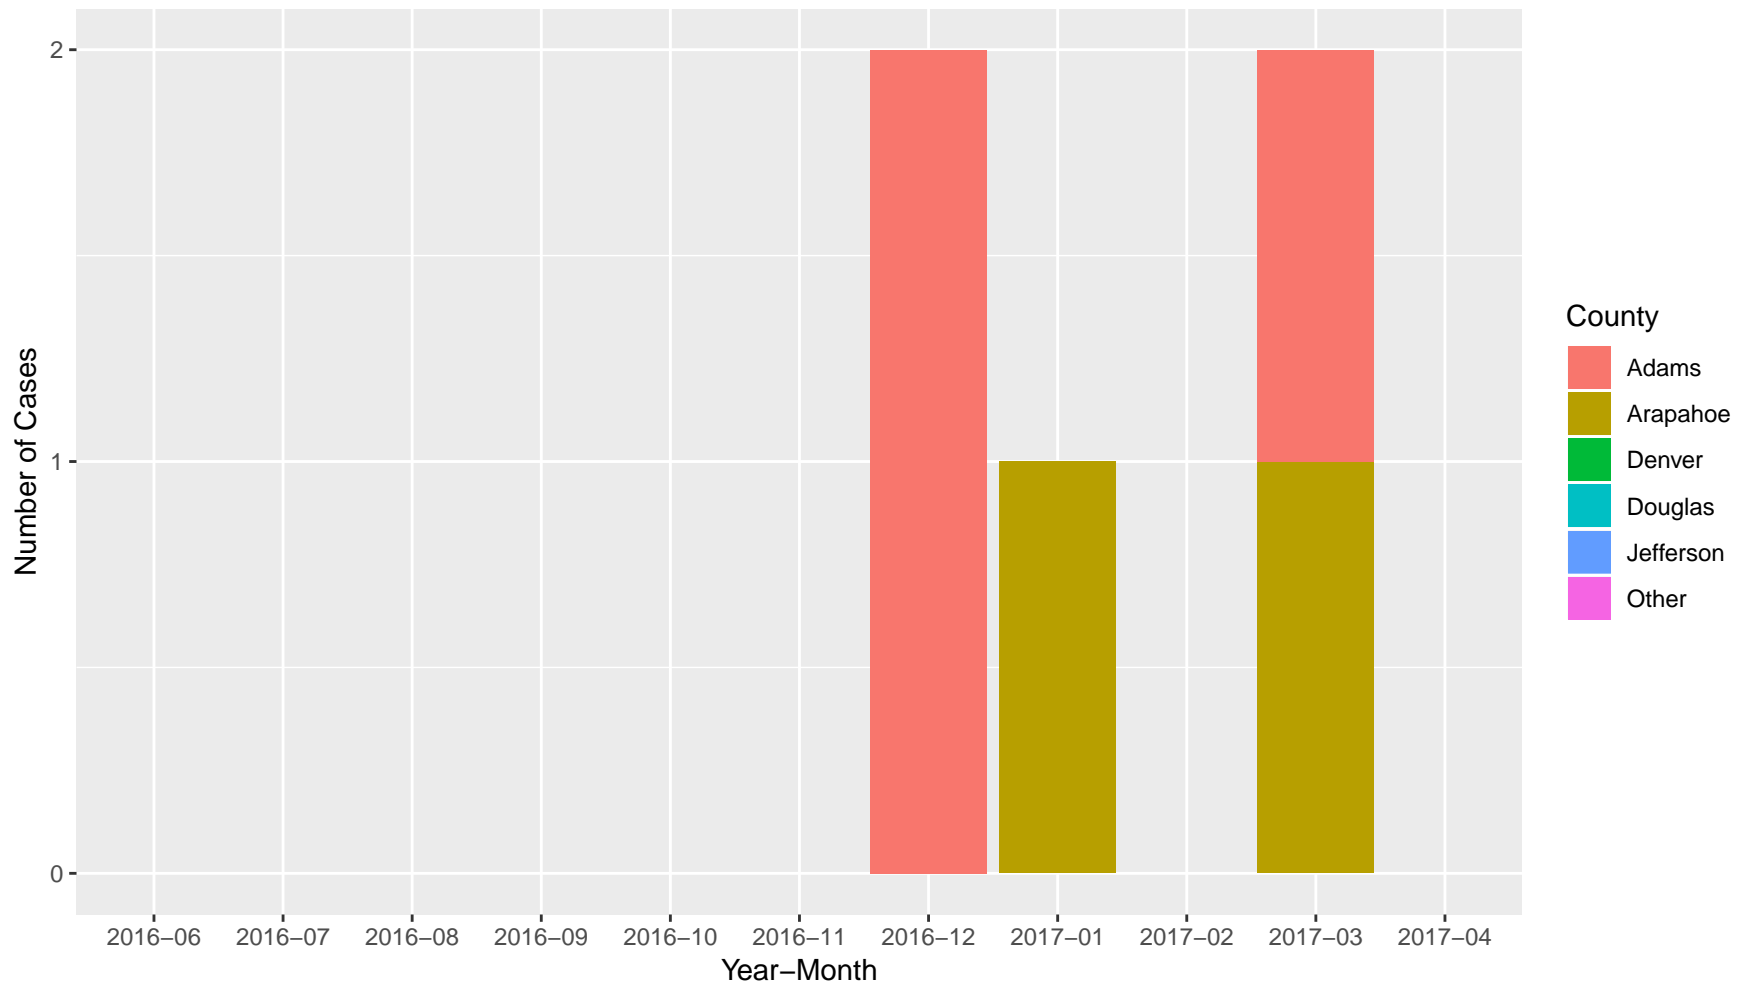

emm75\_Cluster4

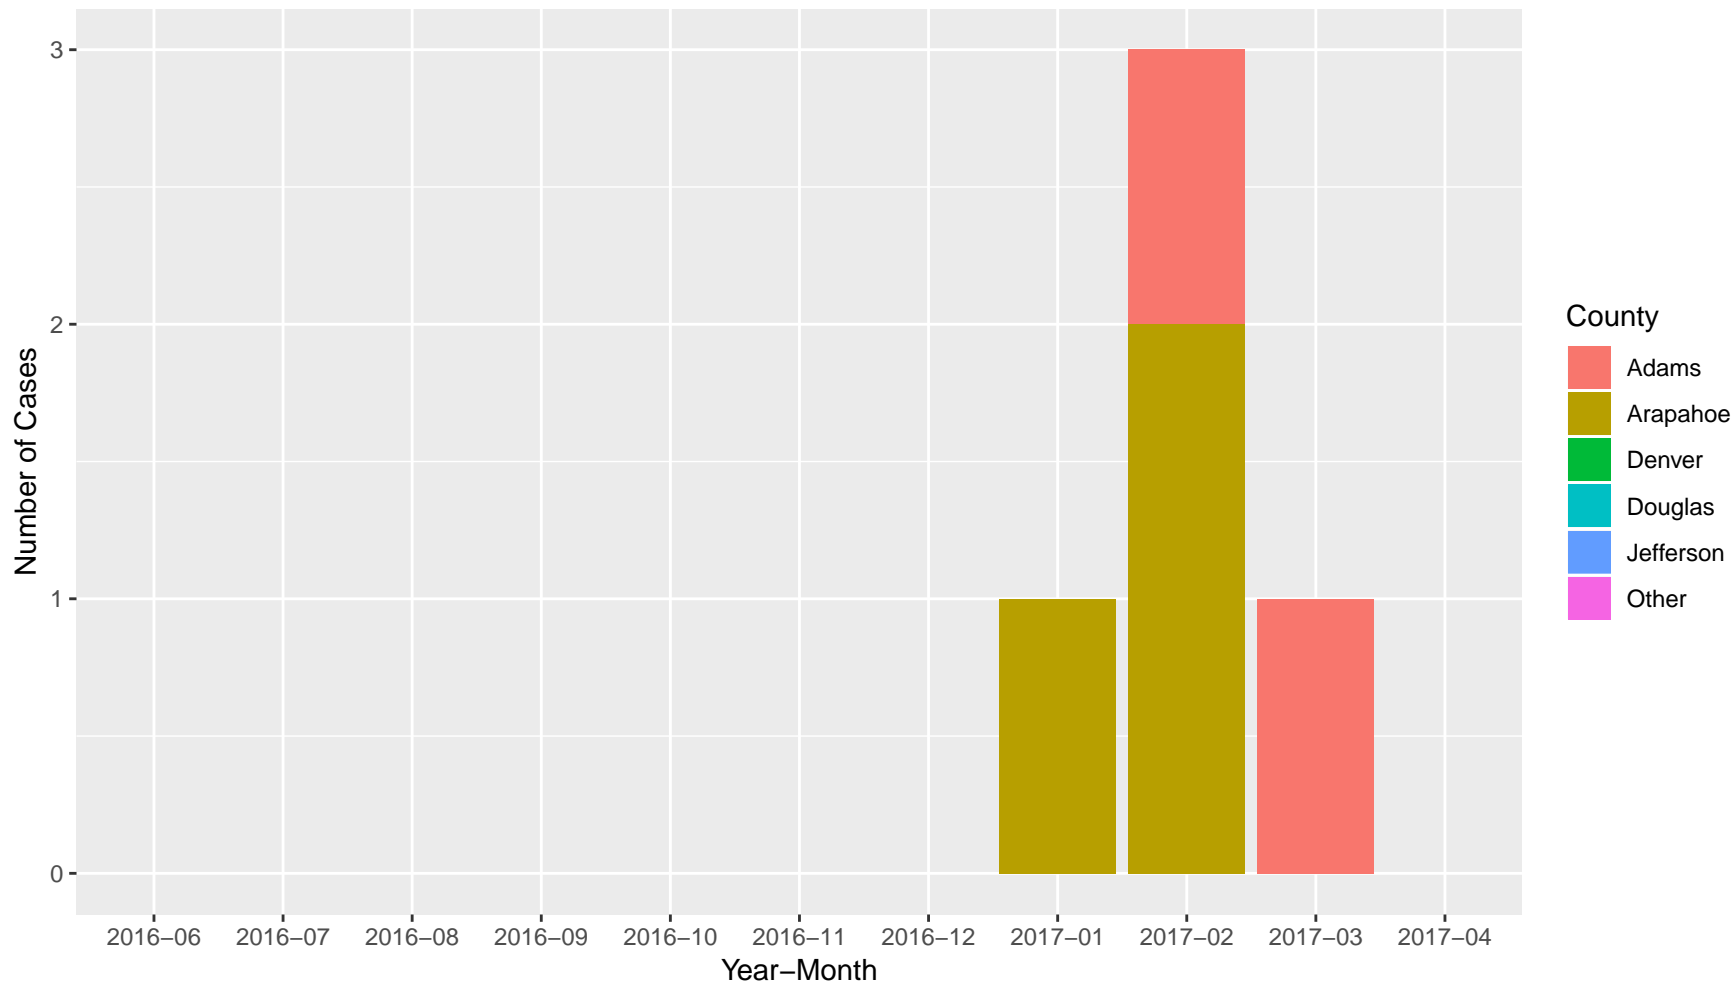

*emm87\_Cluster10*

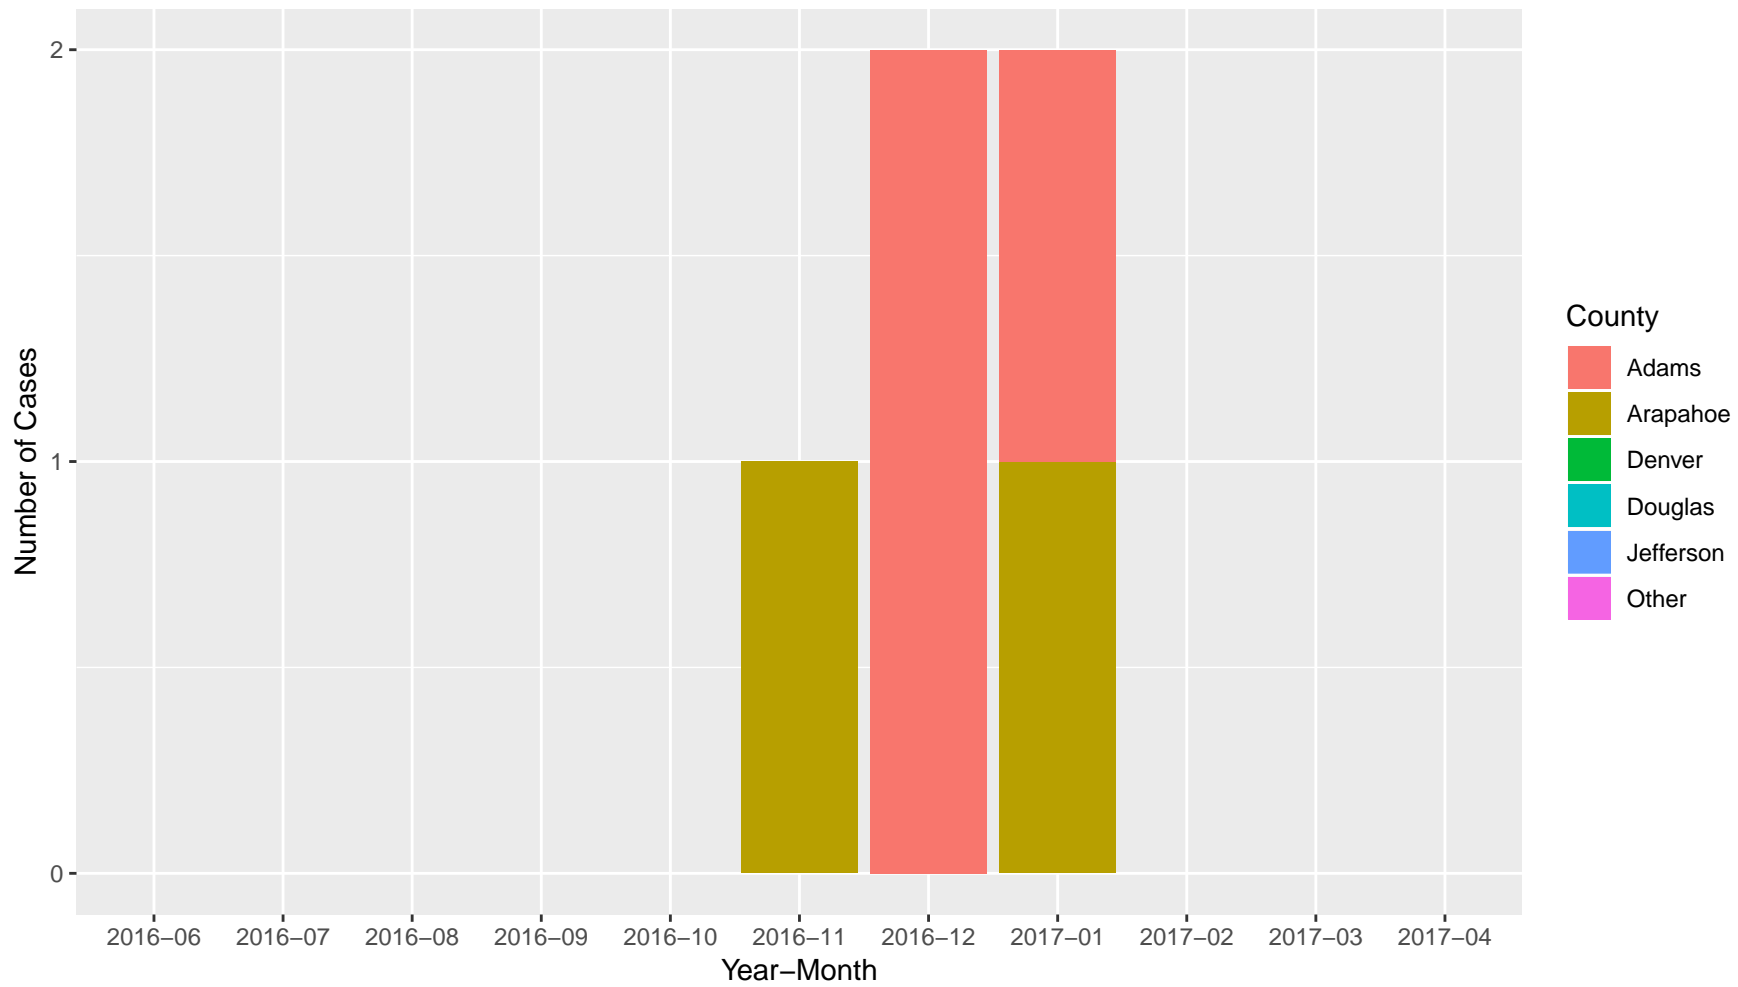

# emm1\_Cluster16

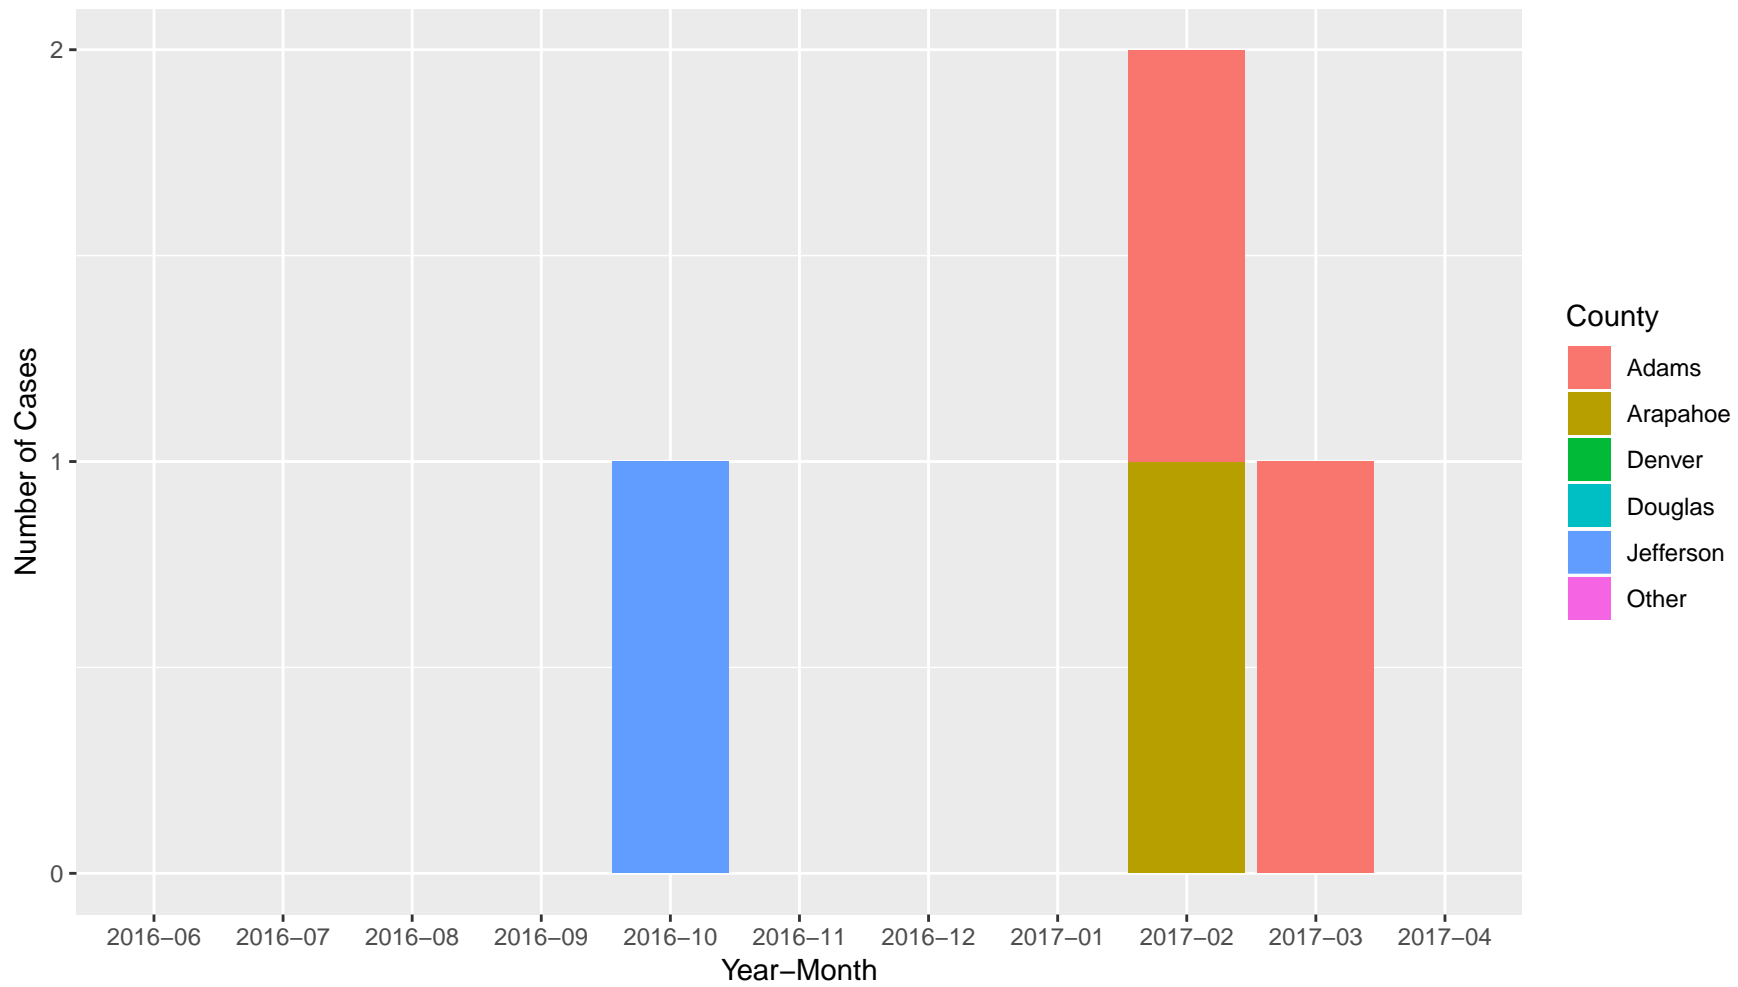

*emm2\_Cluster8*

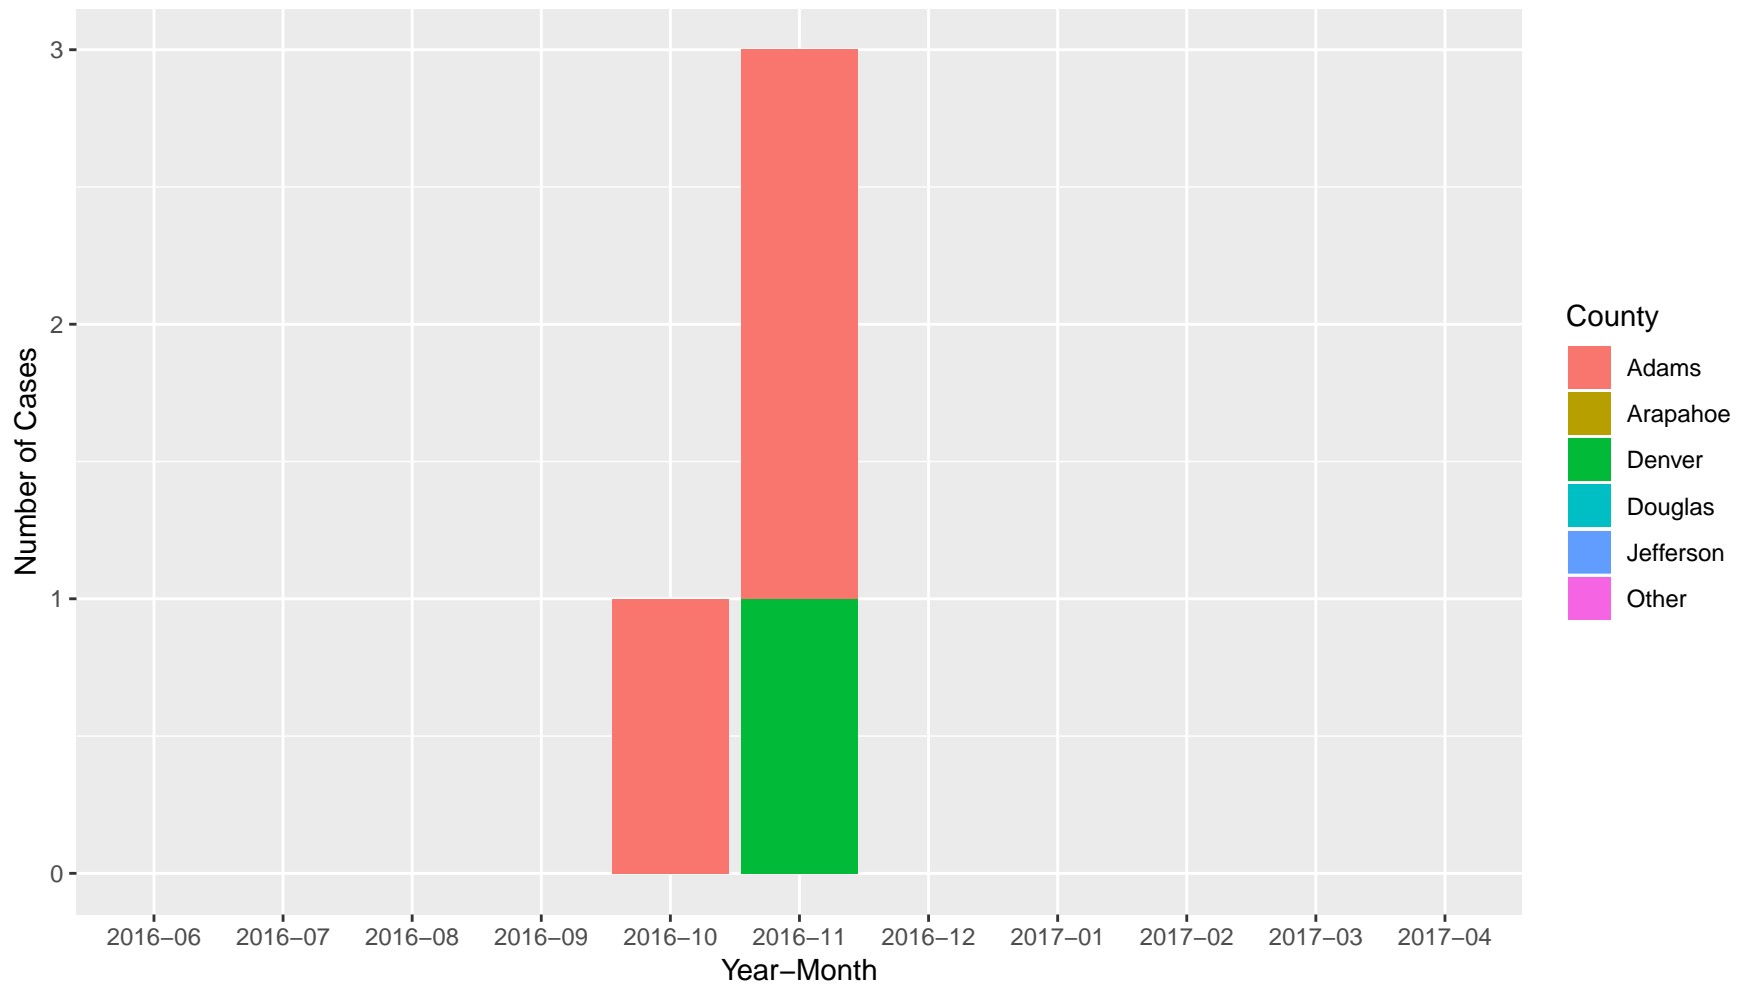

# emm6\_Cluster8

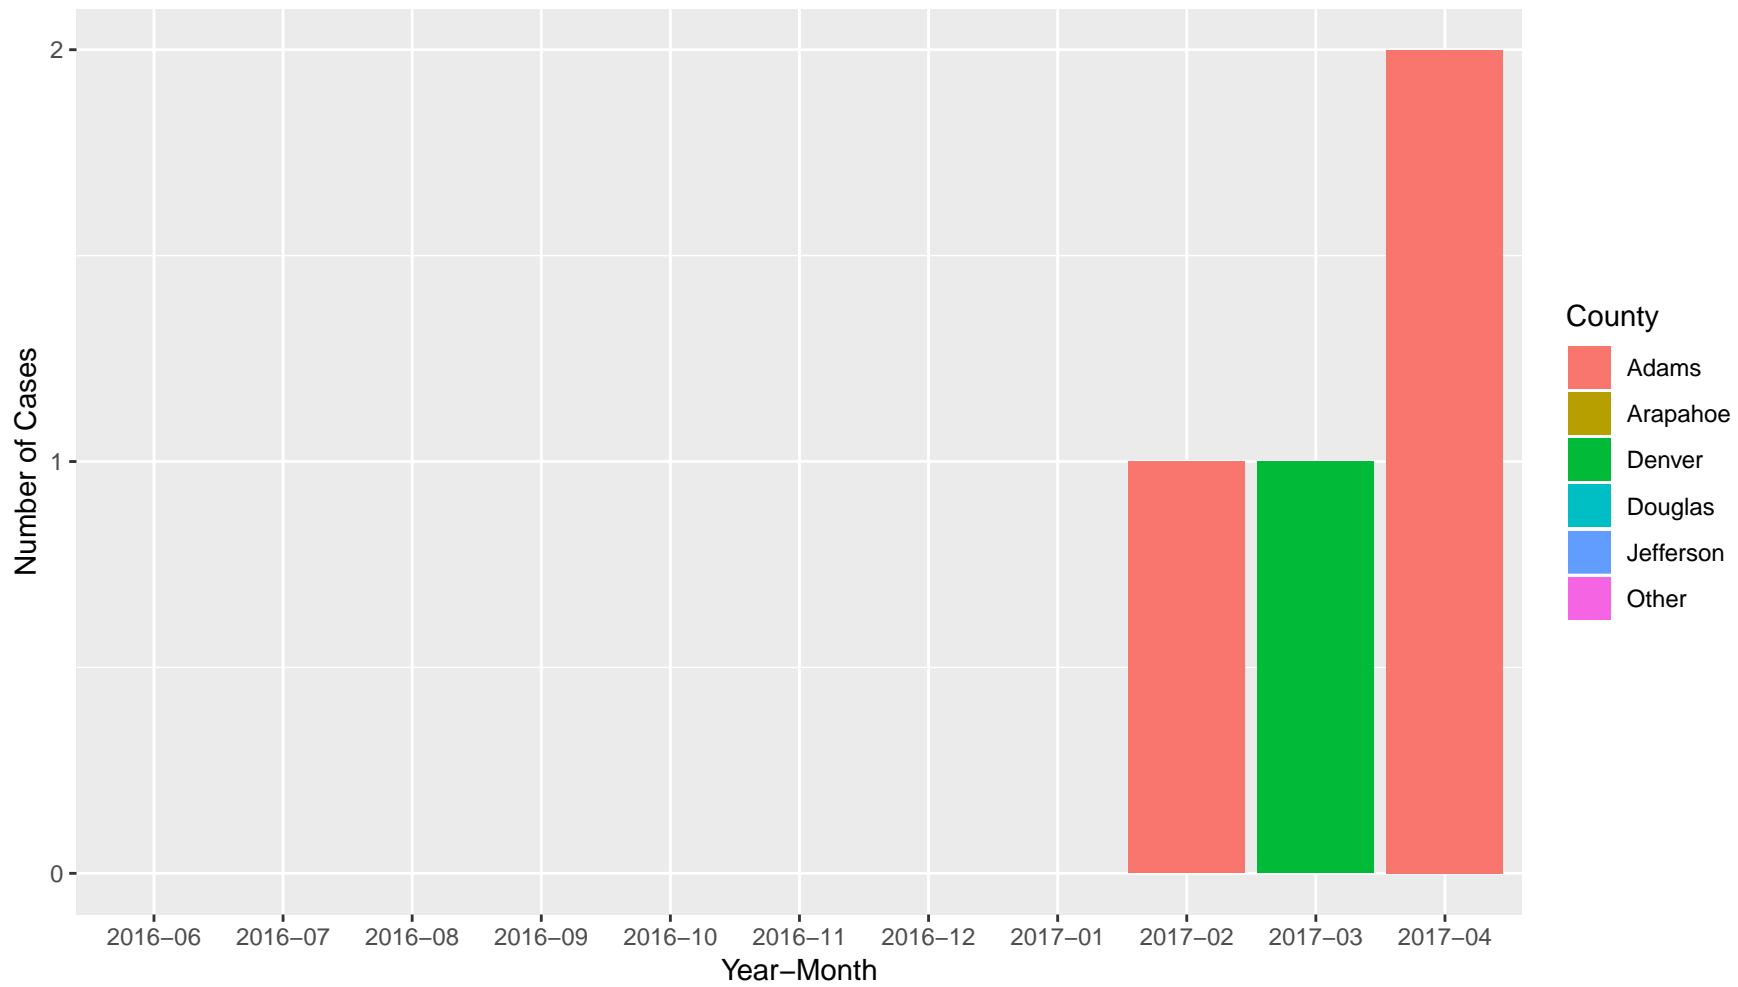

*emm89\_Cluster31*

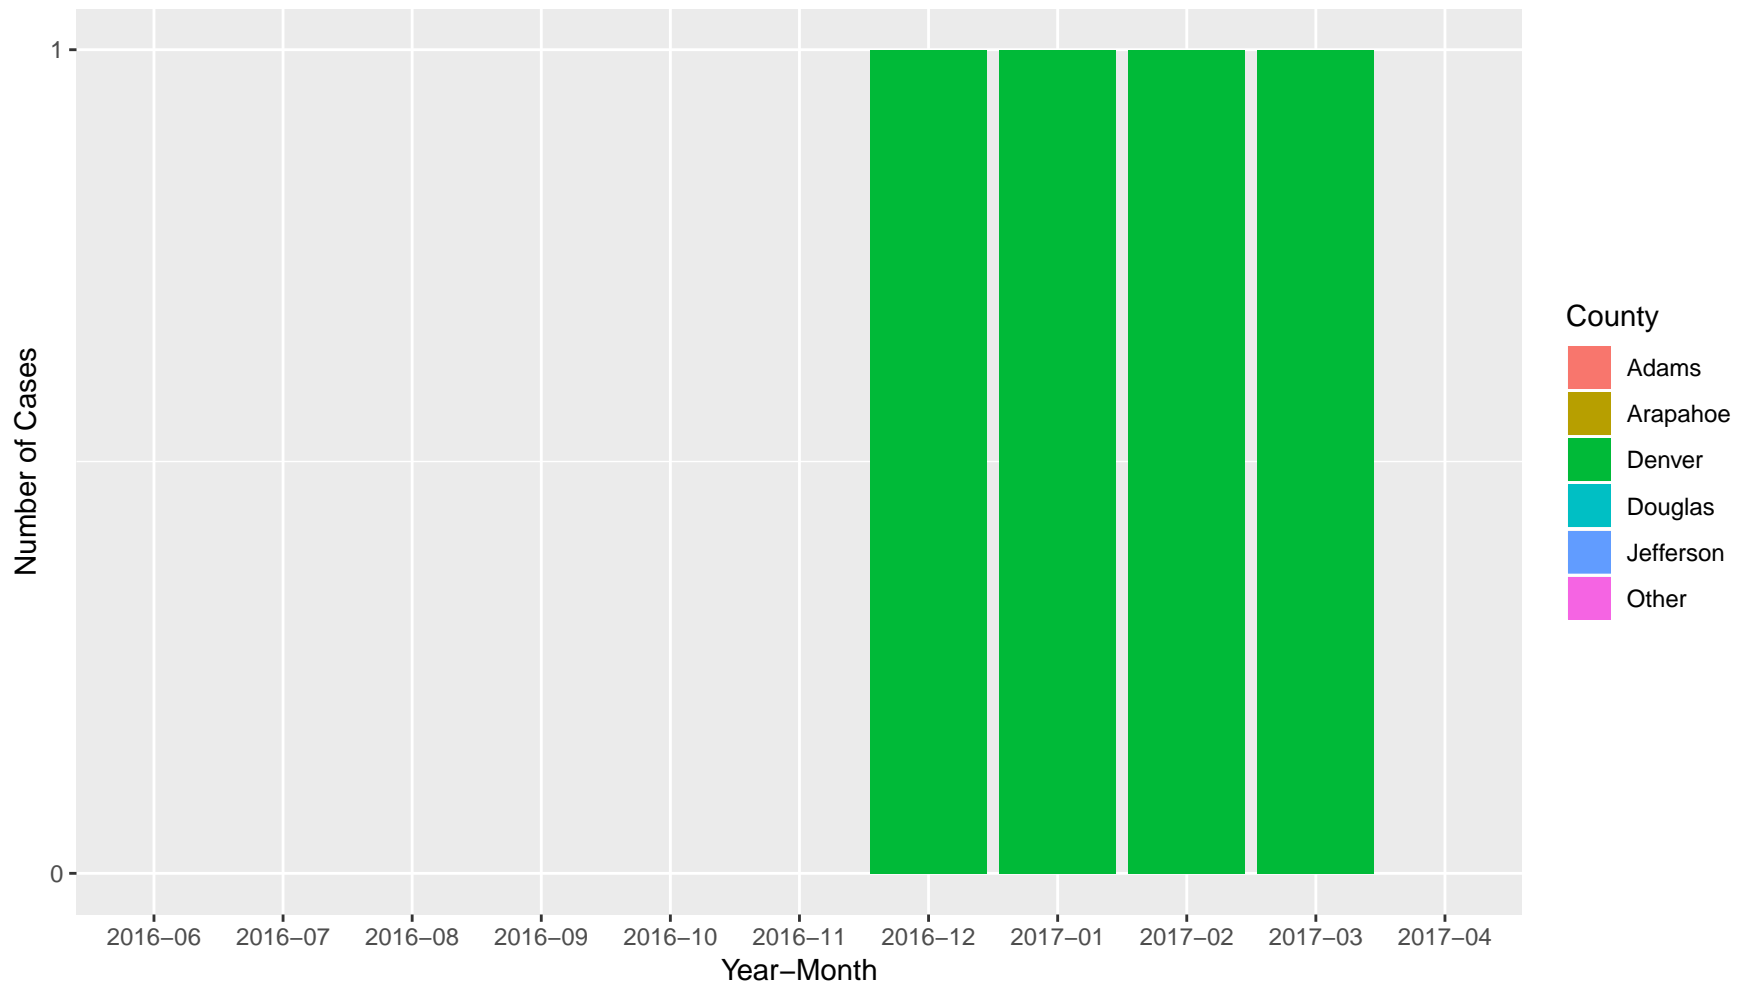



# emm1\_Cluster13

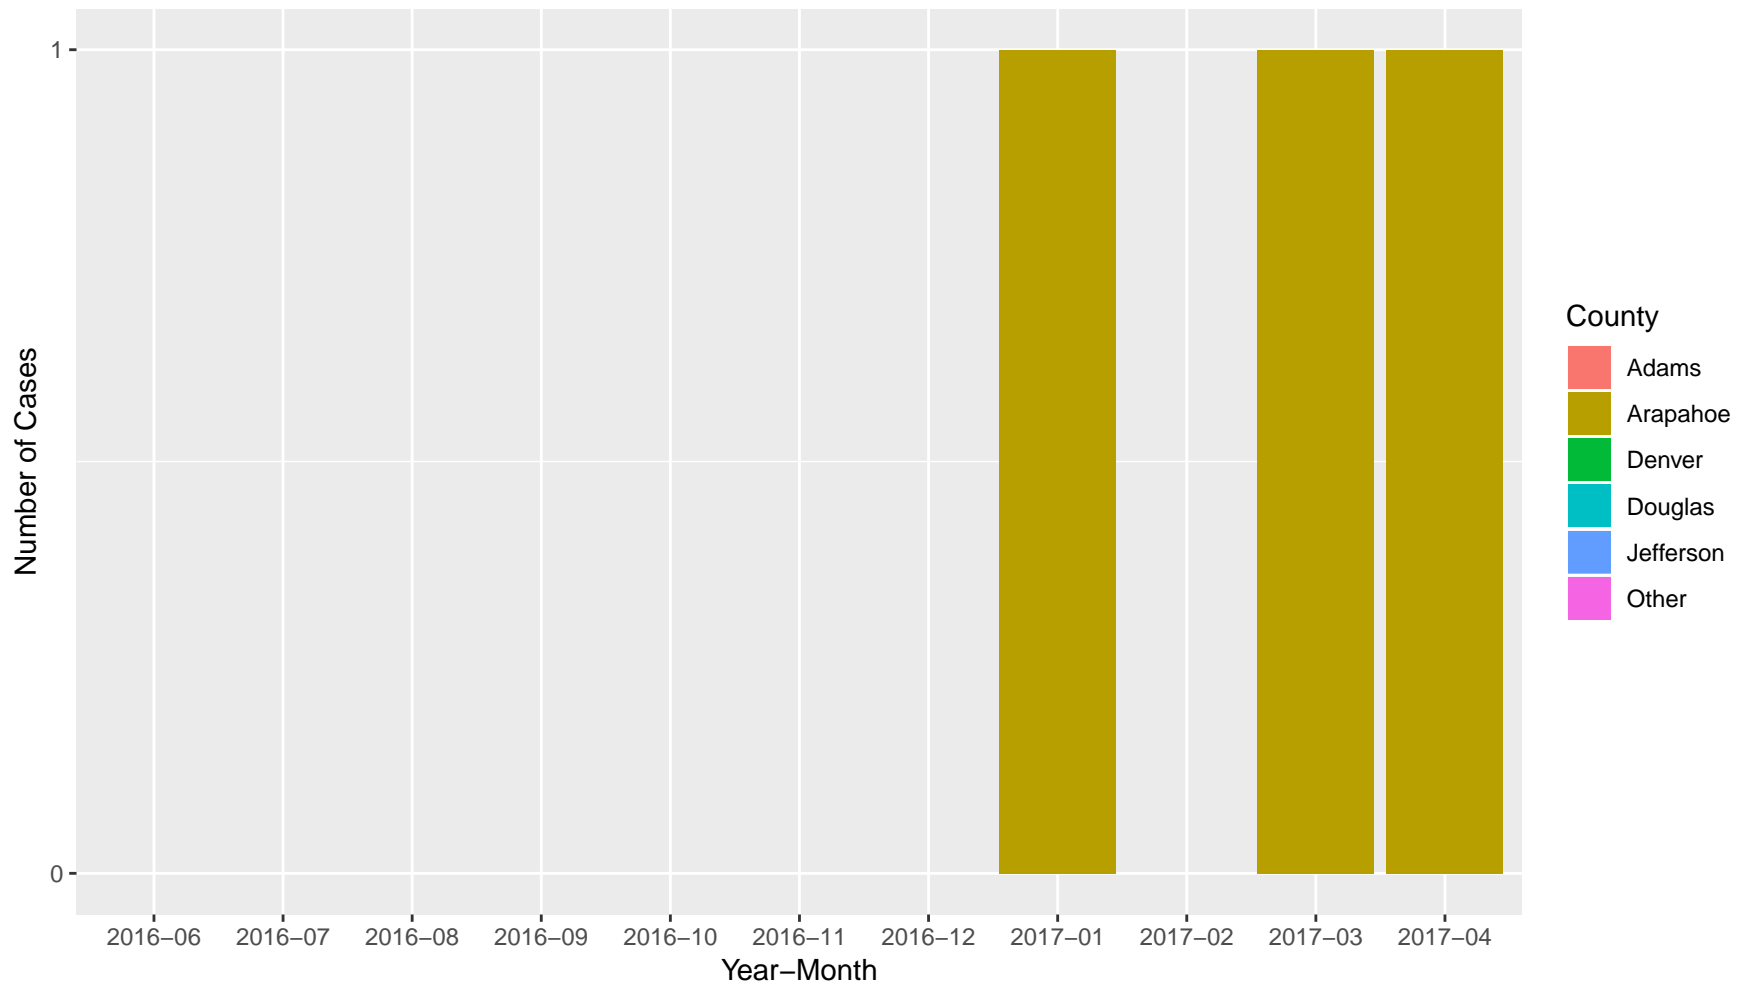

# emm1\_Cluster14

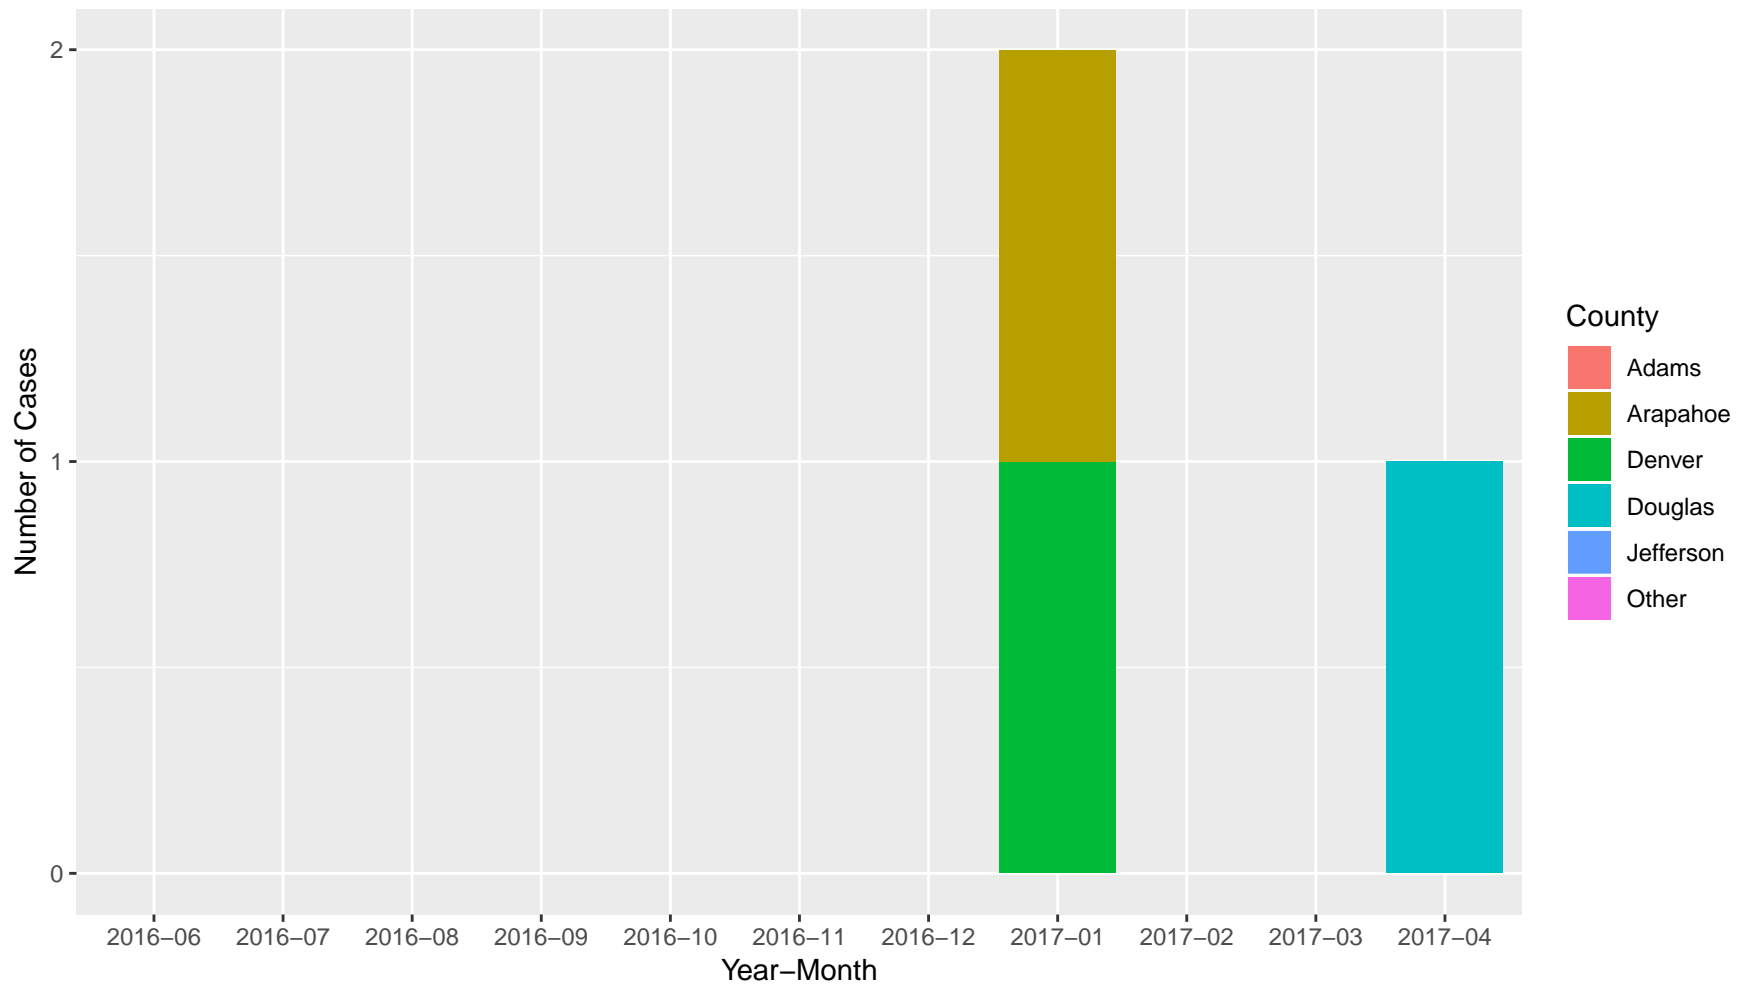

# emm1\_Cluster15

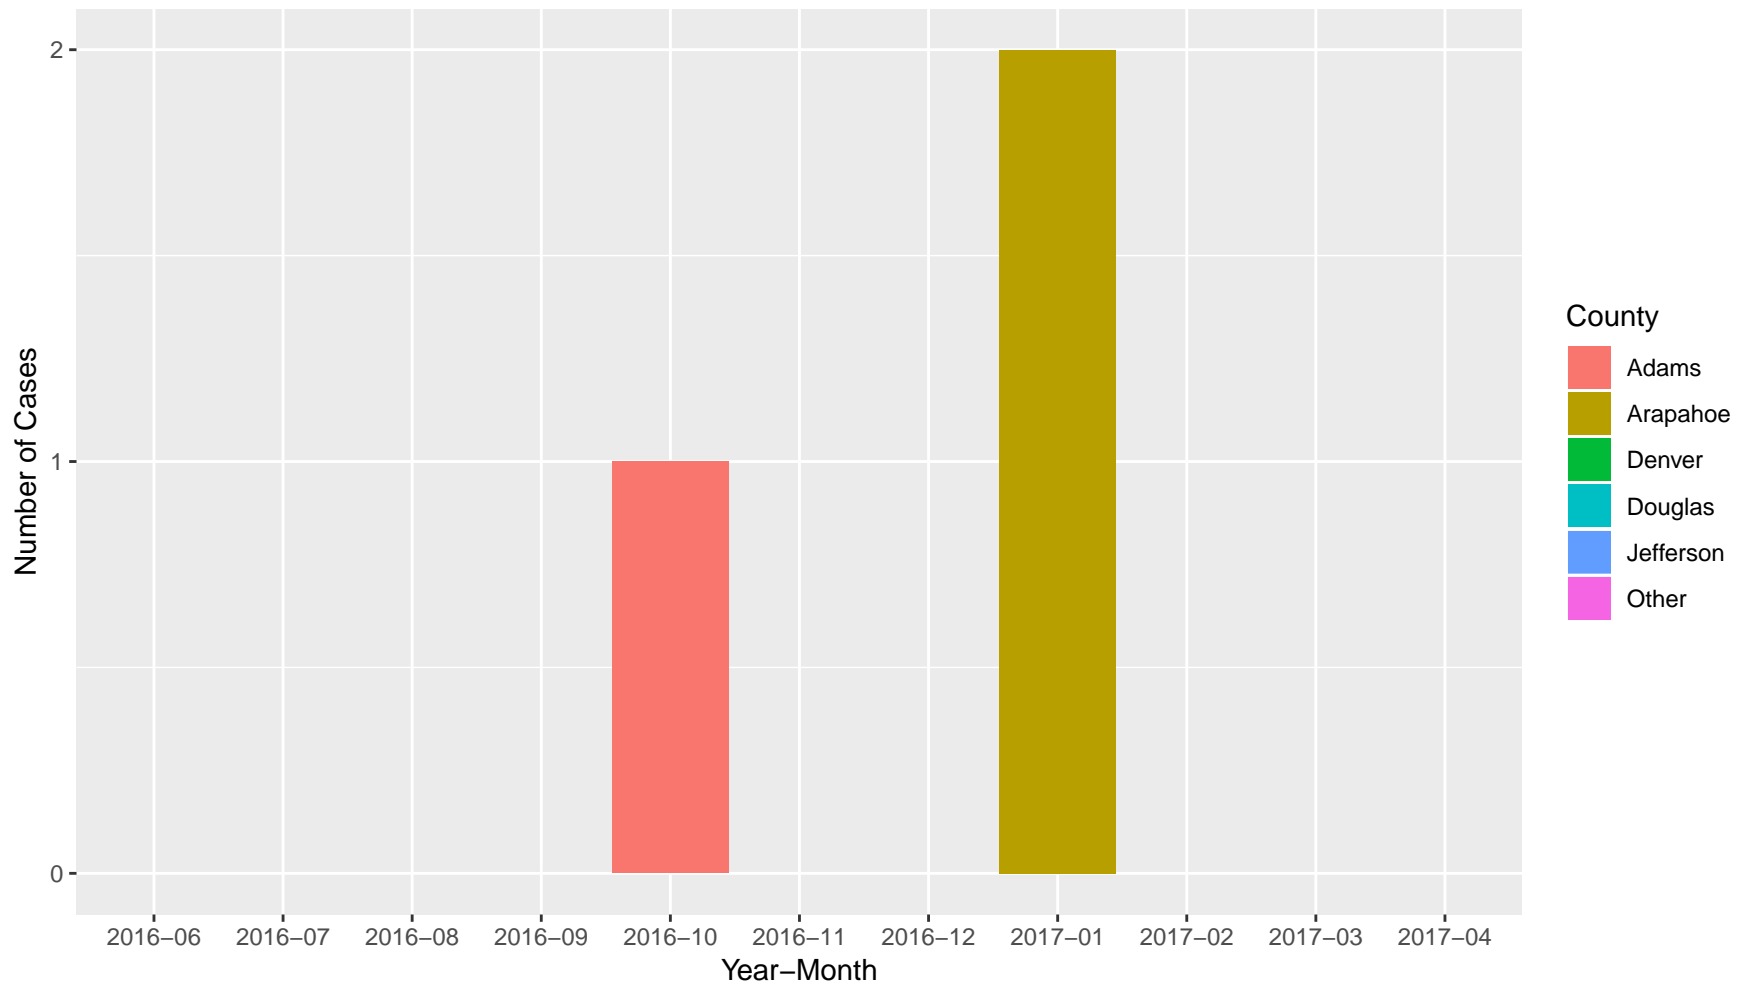

# emm1\_Cluster17

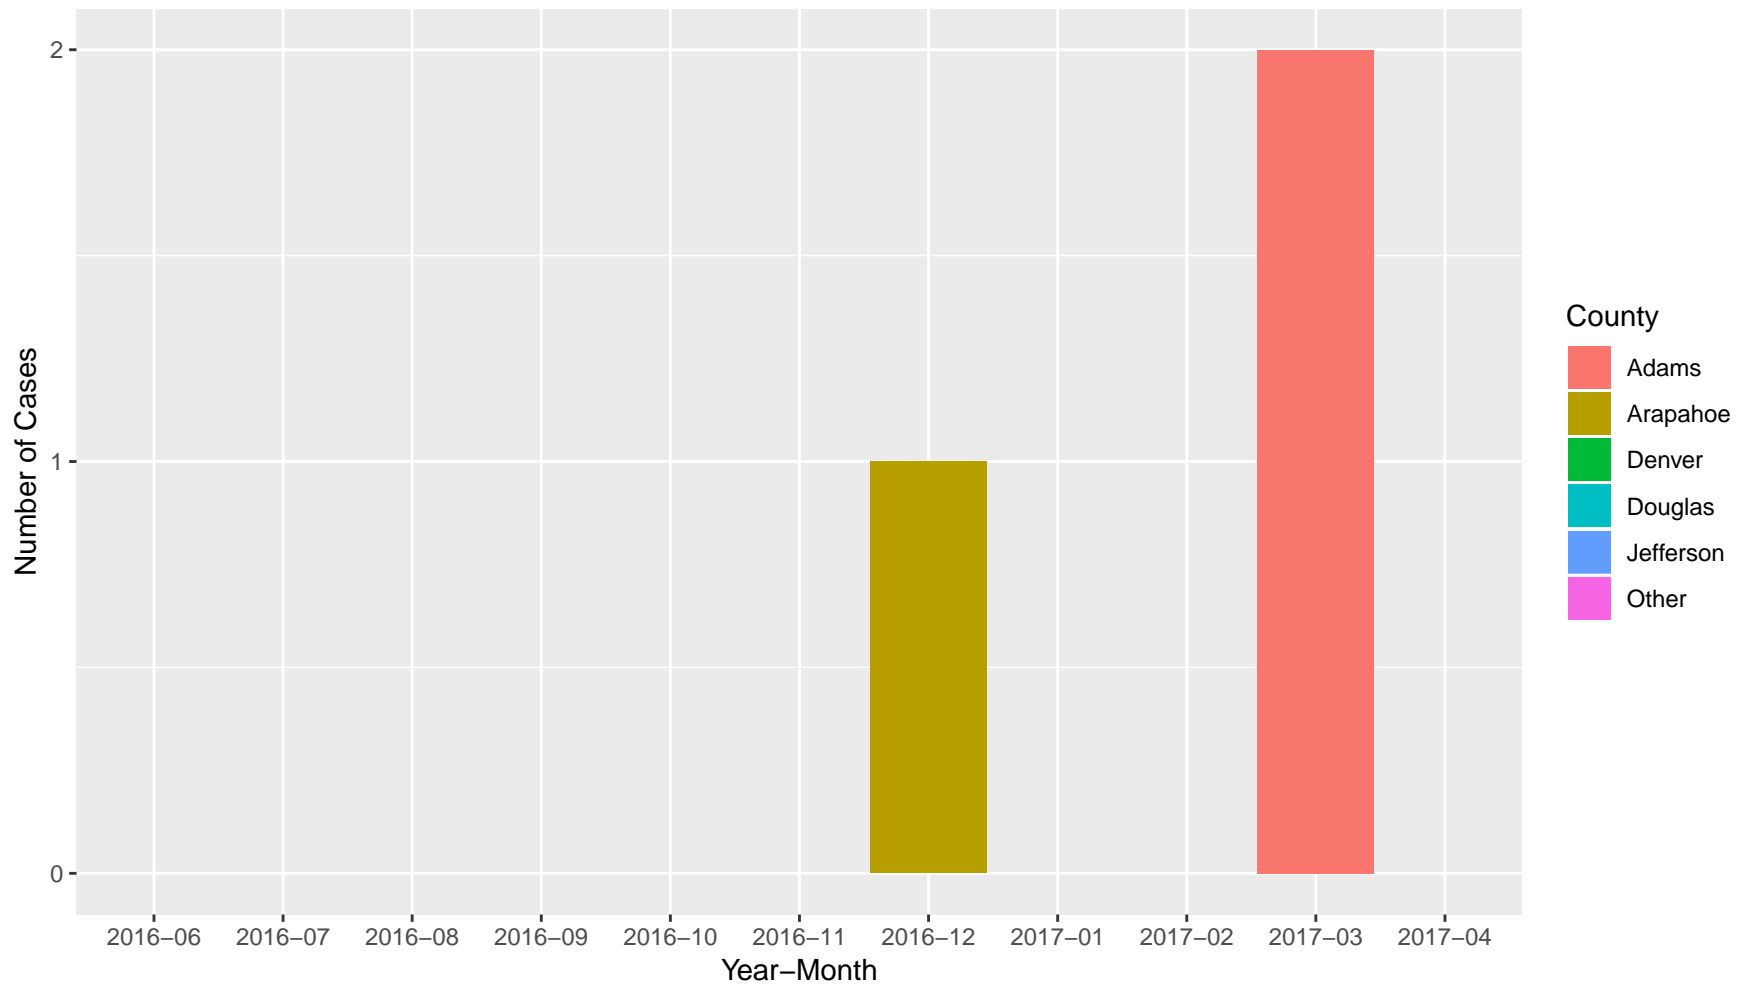

# emm1\_Cluster18

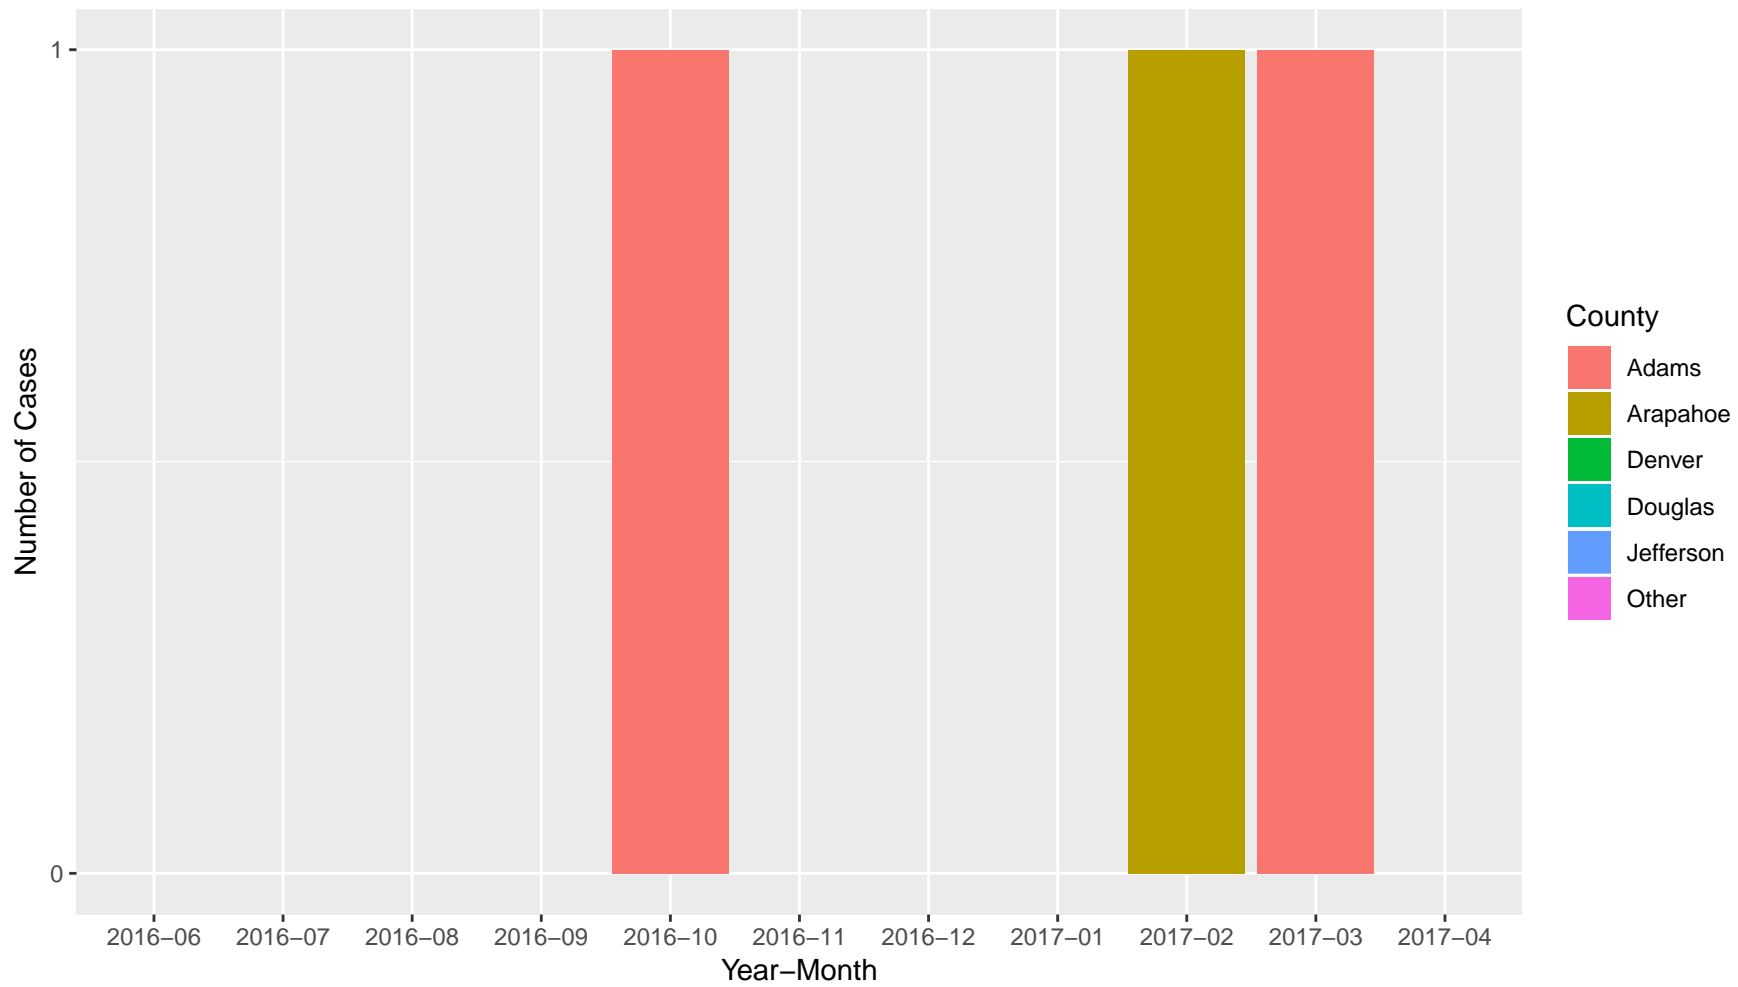

*emm1\_Cluster2*

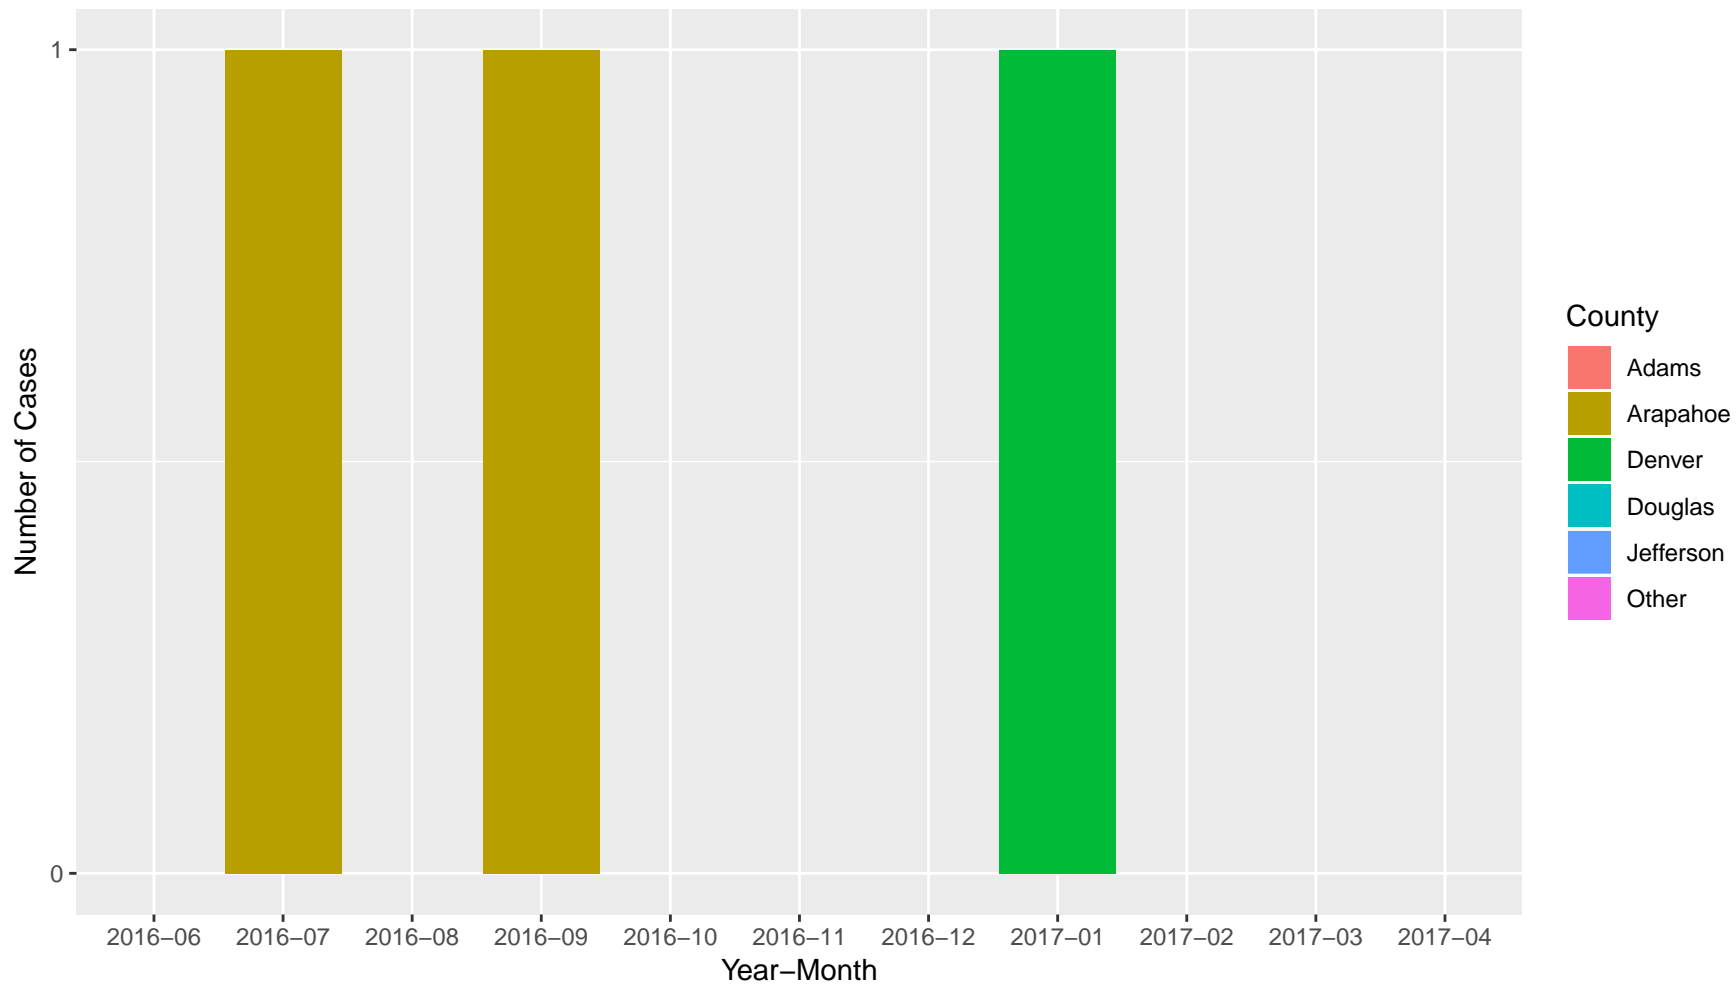

# emm12\_Cluster13

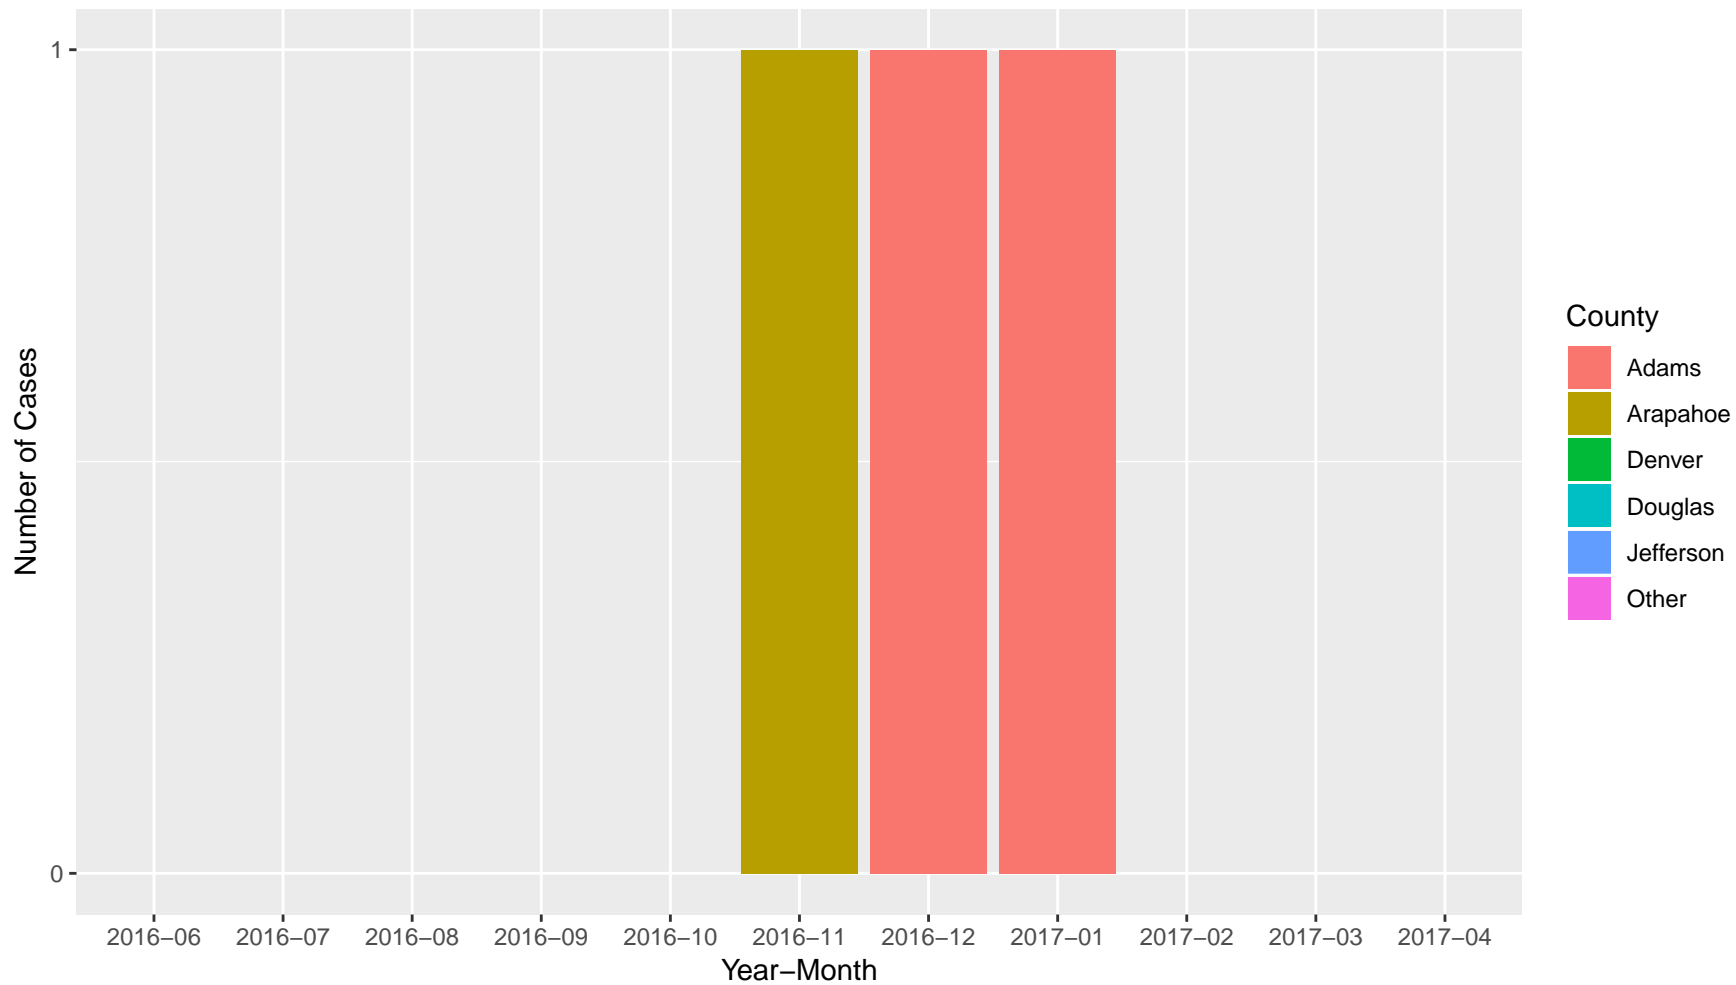

# emm12\_Cluster16

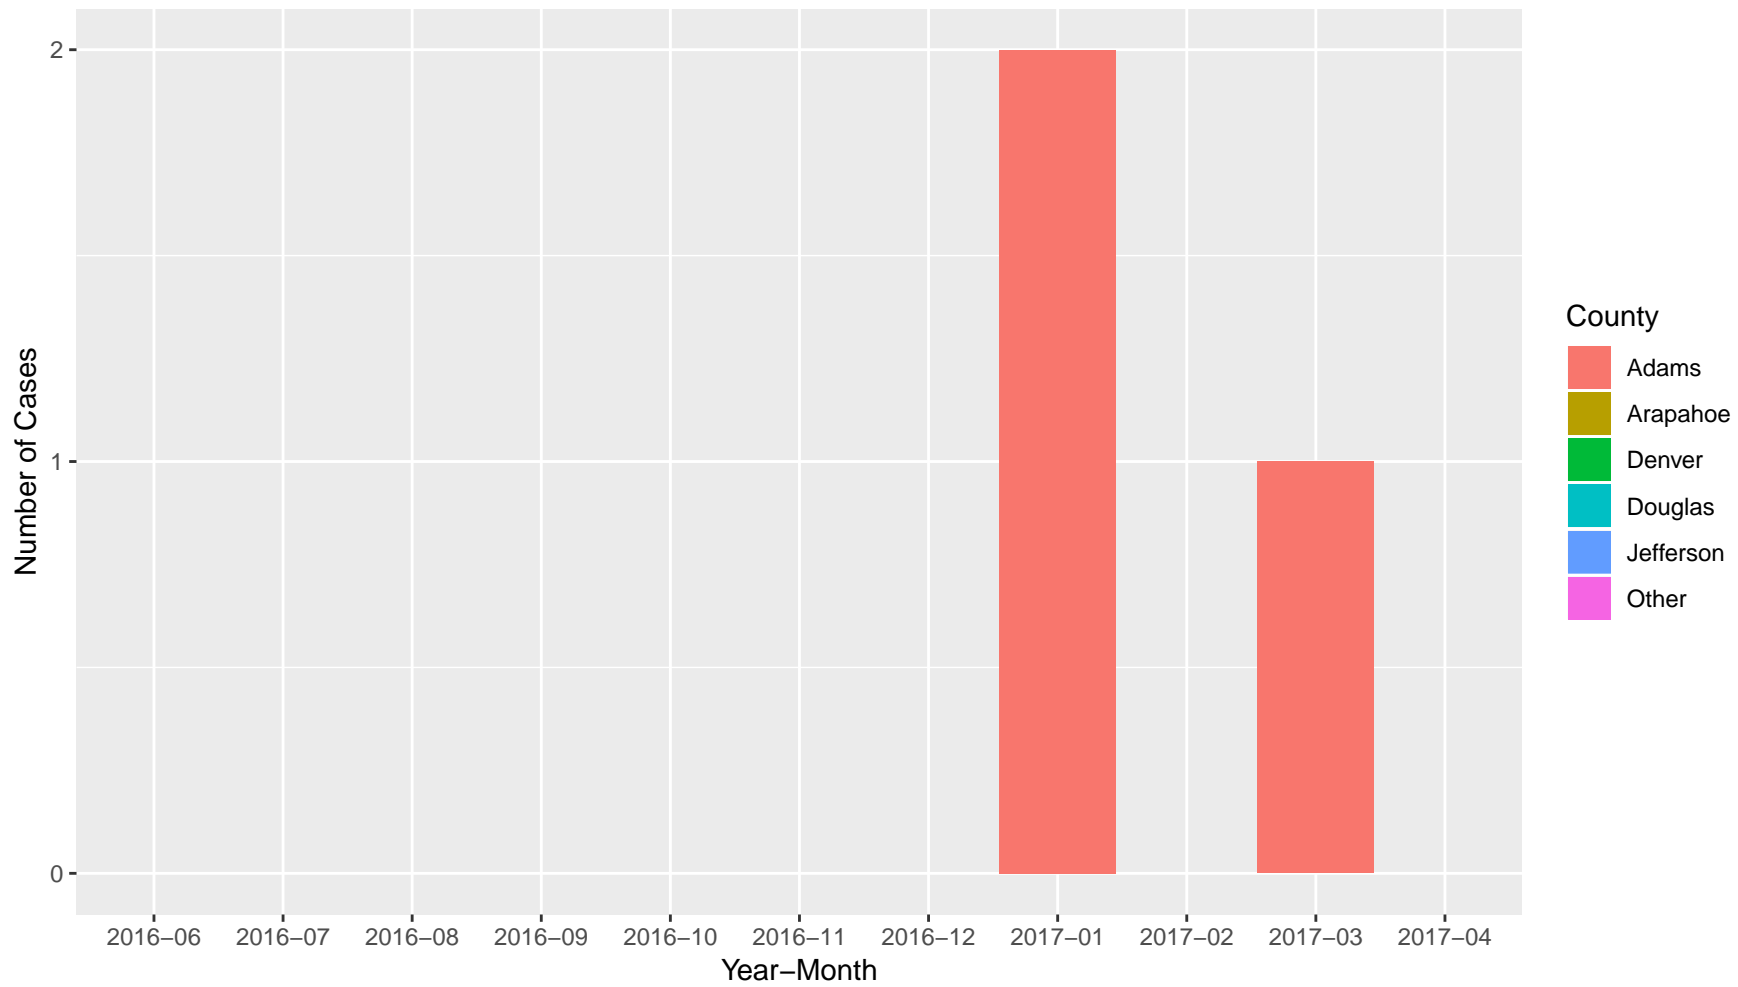



emm2\_Cluster6

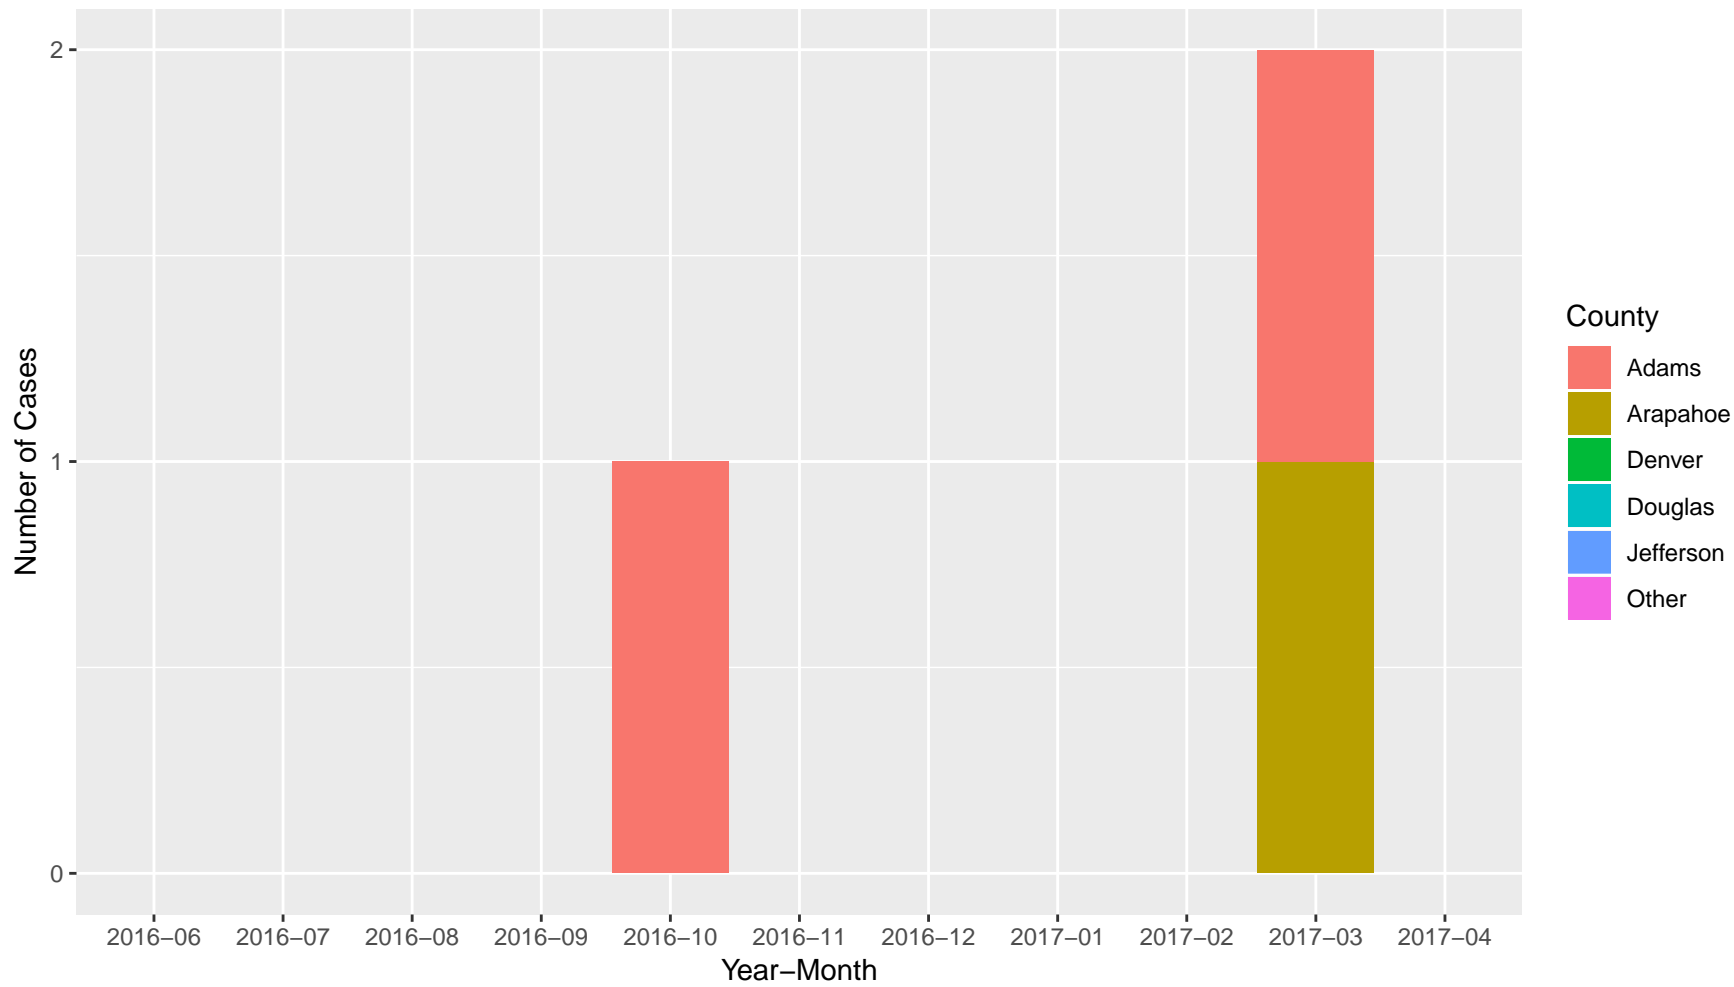

*emm28\_Cluster1*

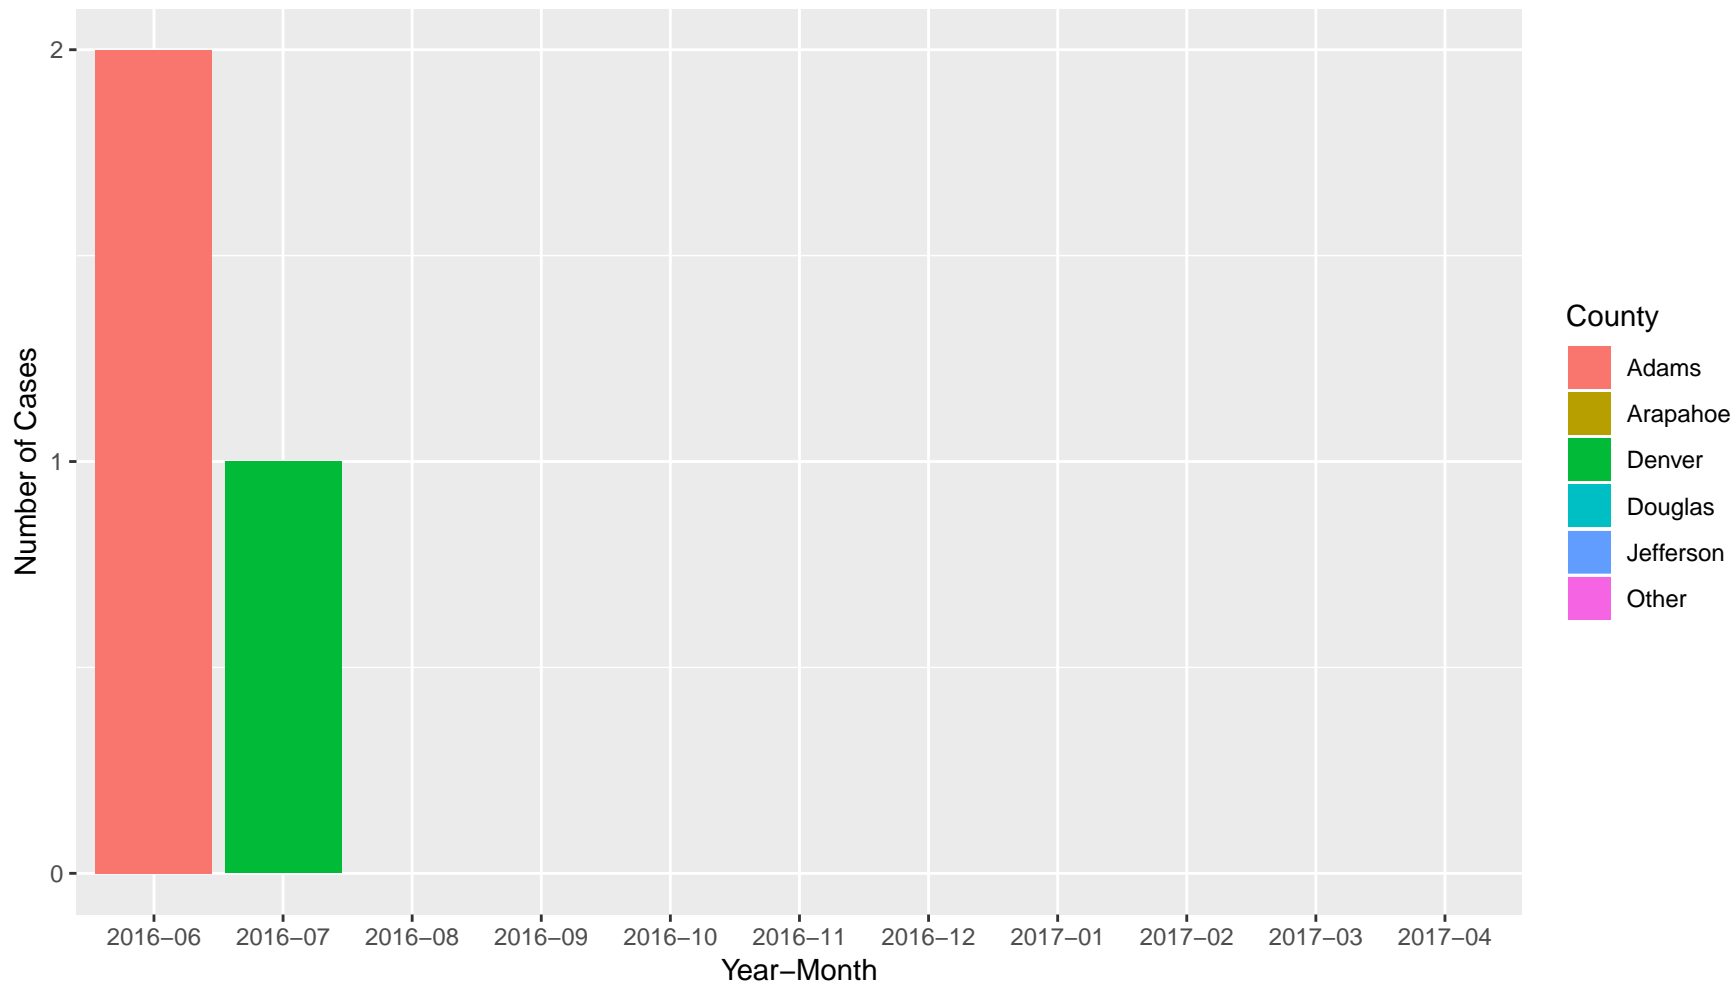

*emm28\_Cluster3*

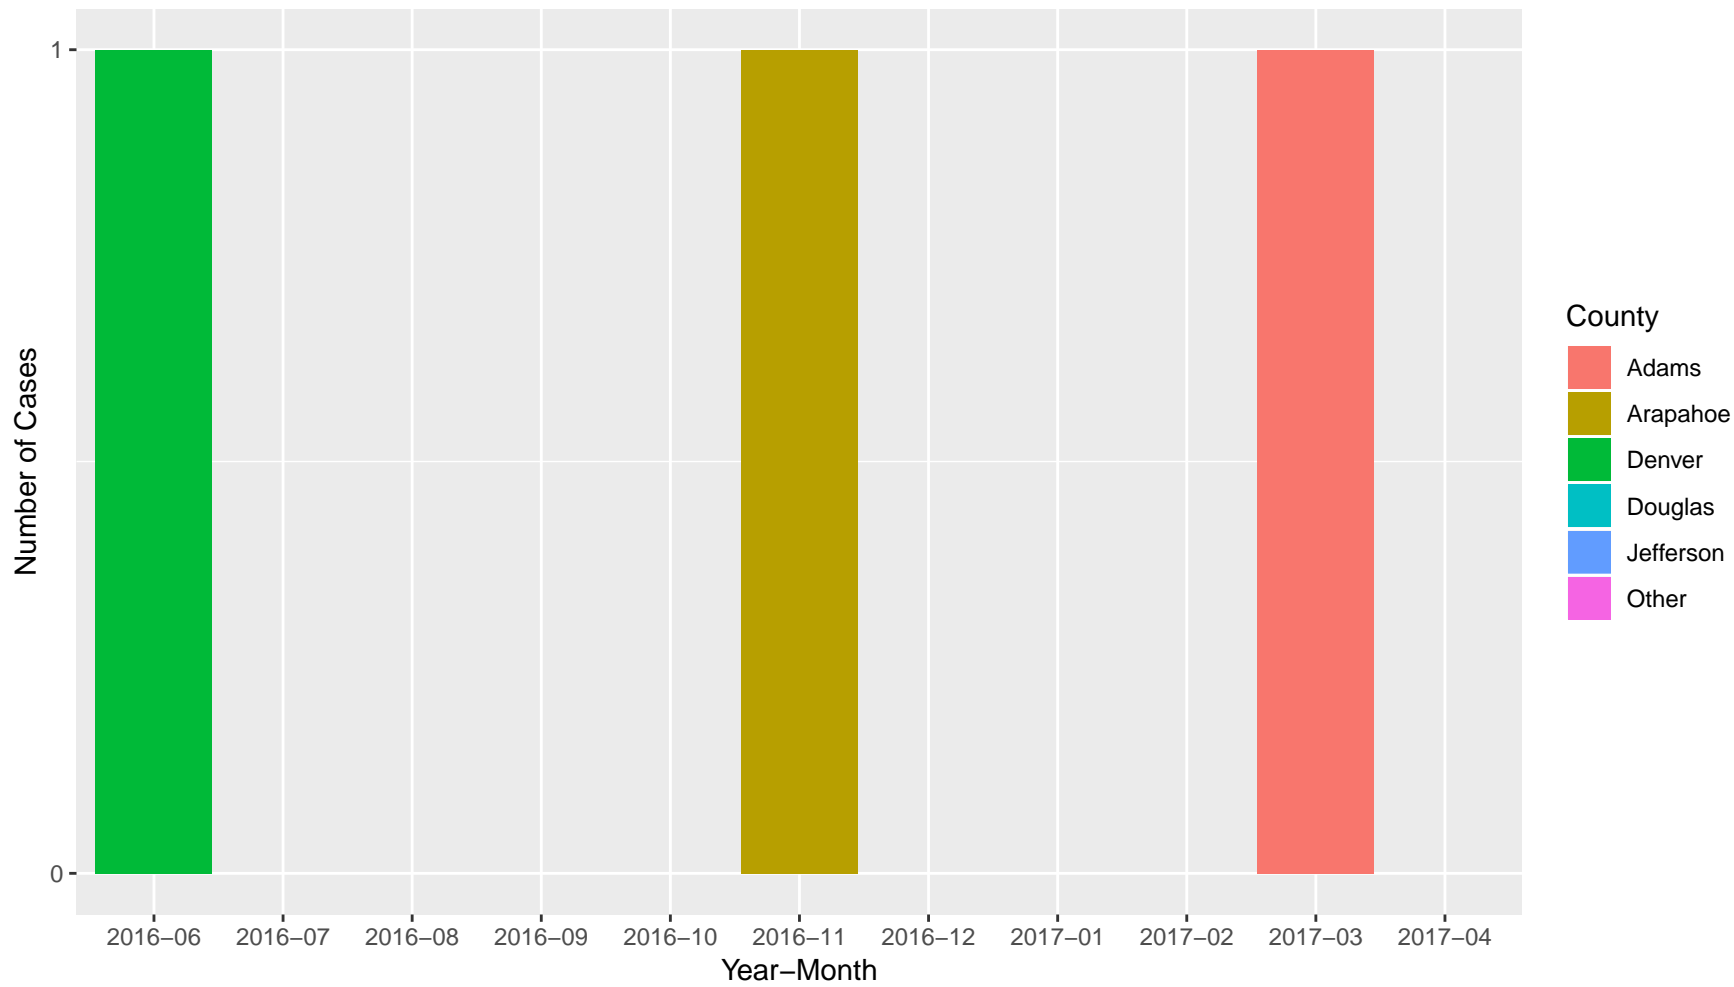

*emm3\_Cluster3*

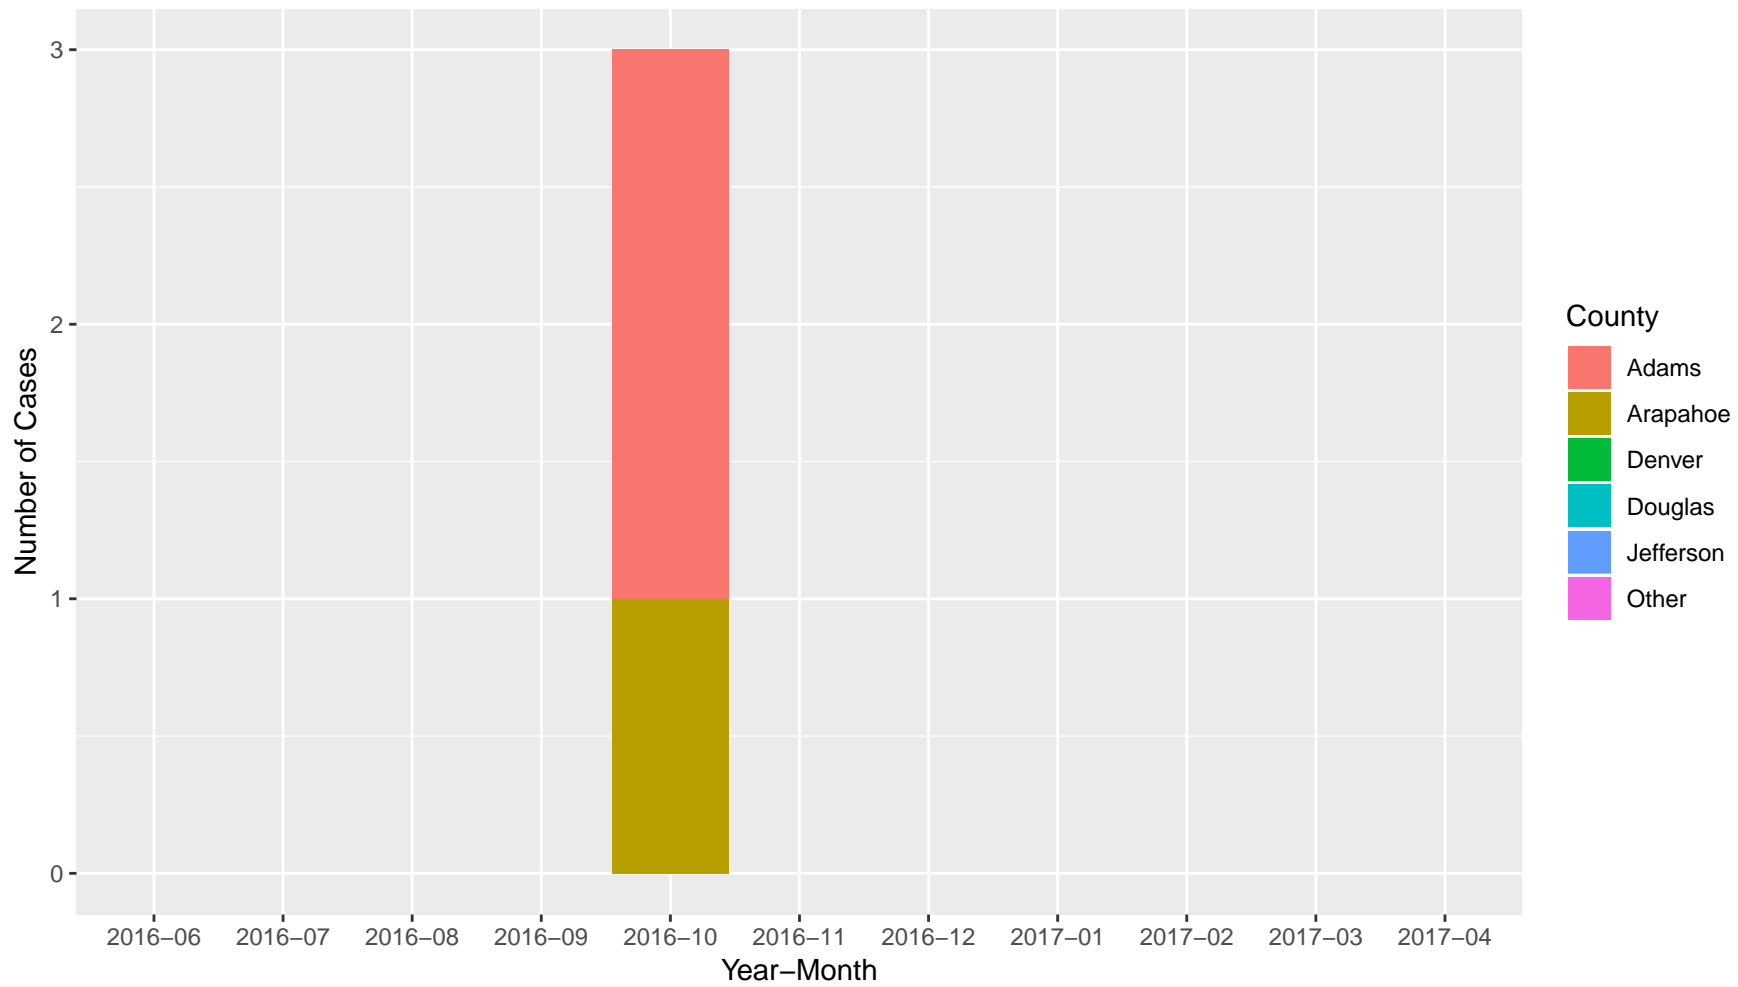

# emm4\_Cluster14

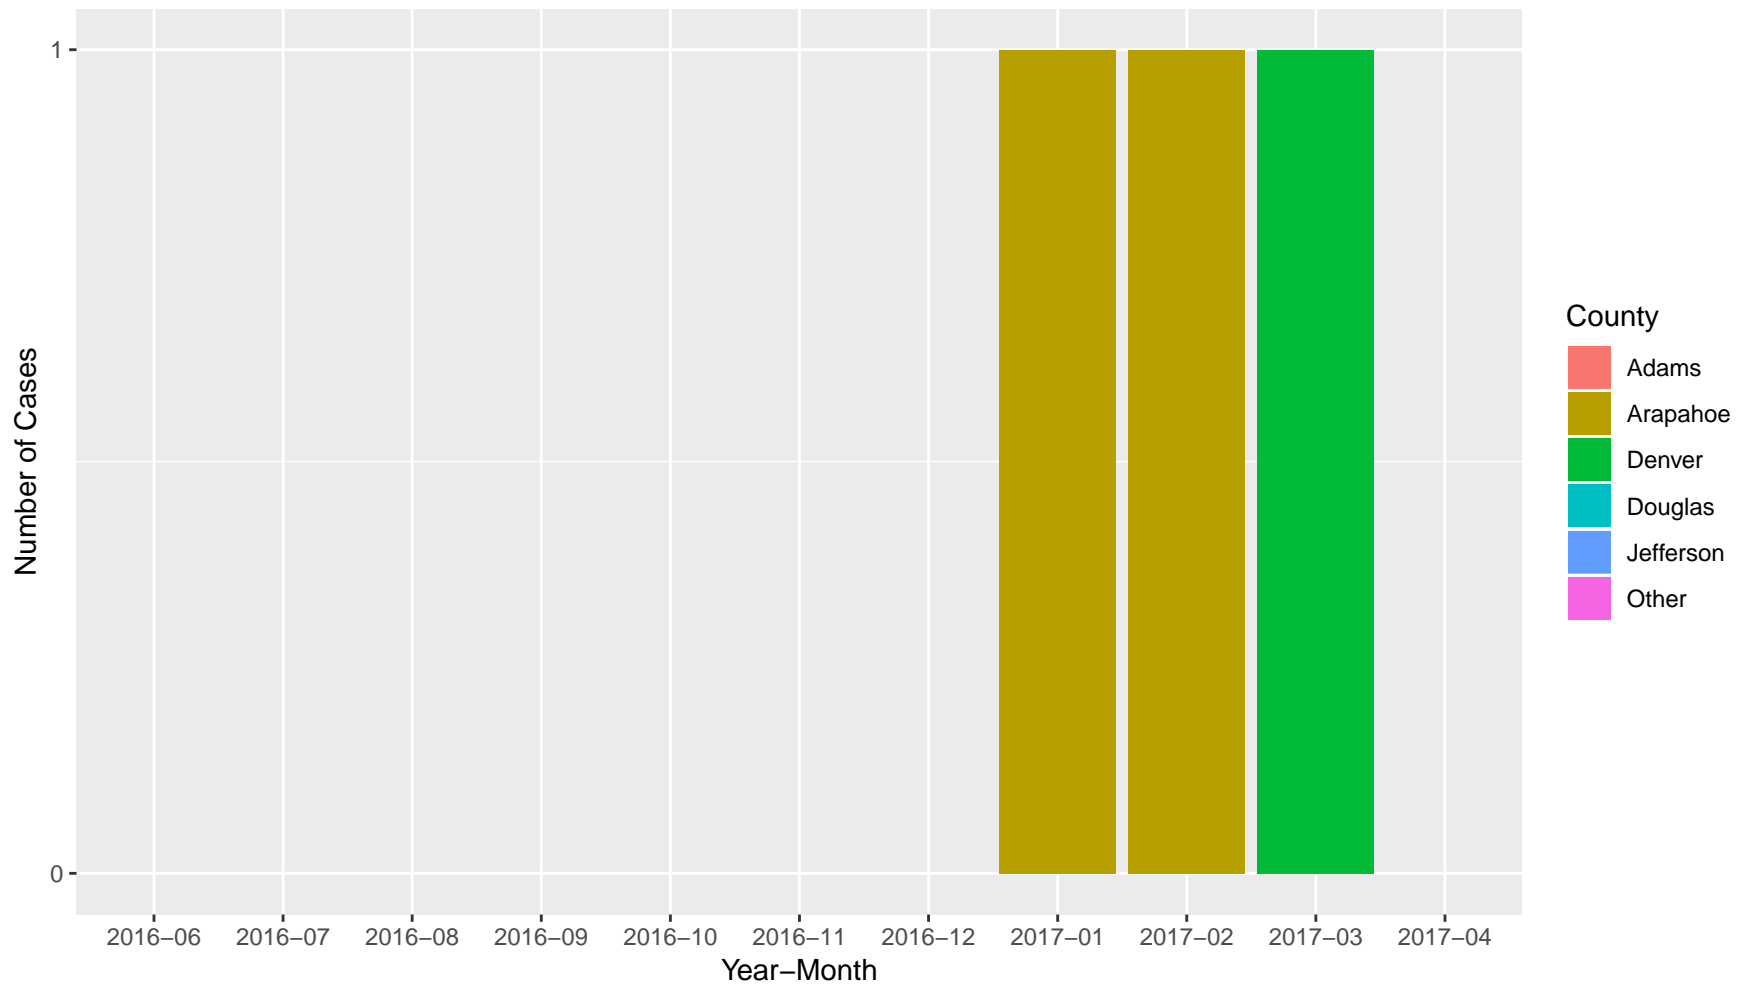

# emm4\_Cluster17



# emm4\_Cluster19

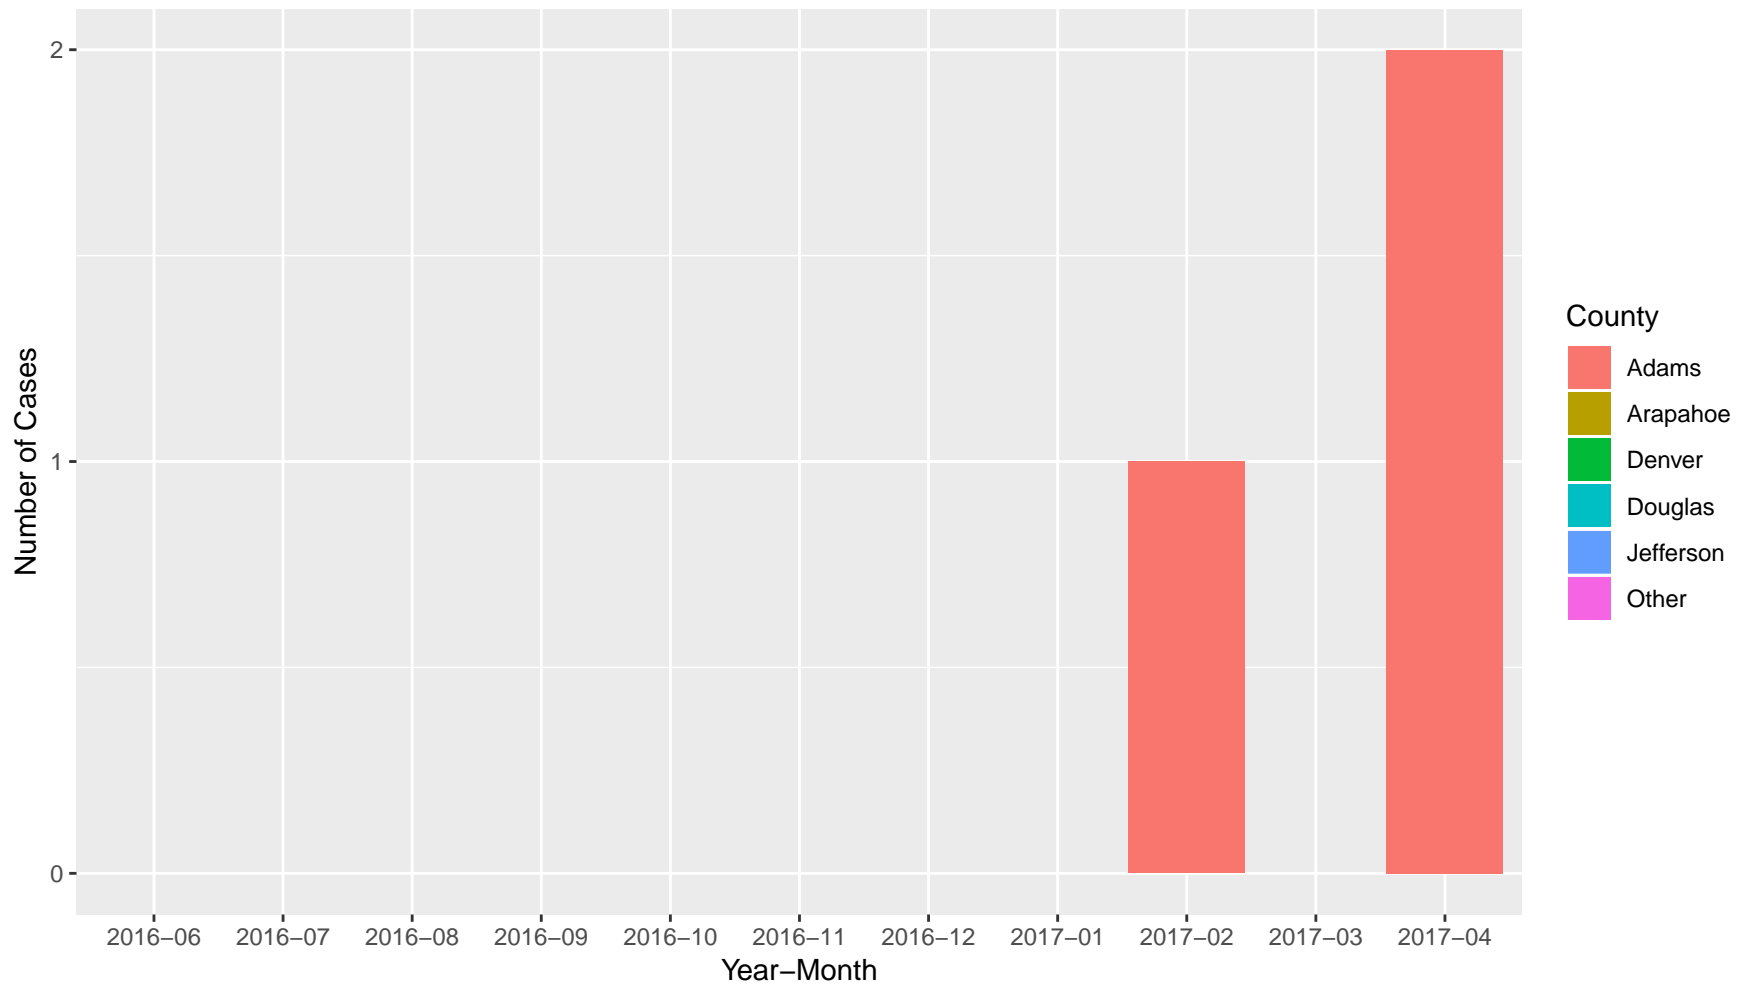

# emm4\_Cluster6

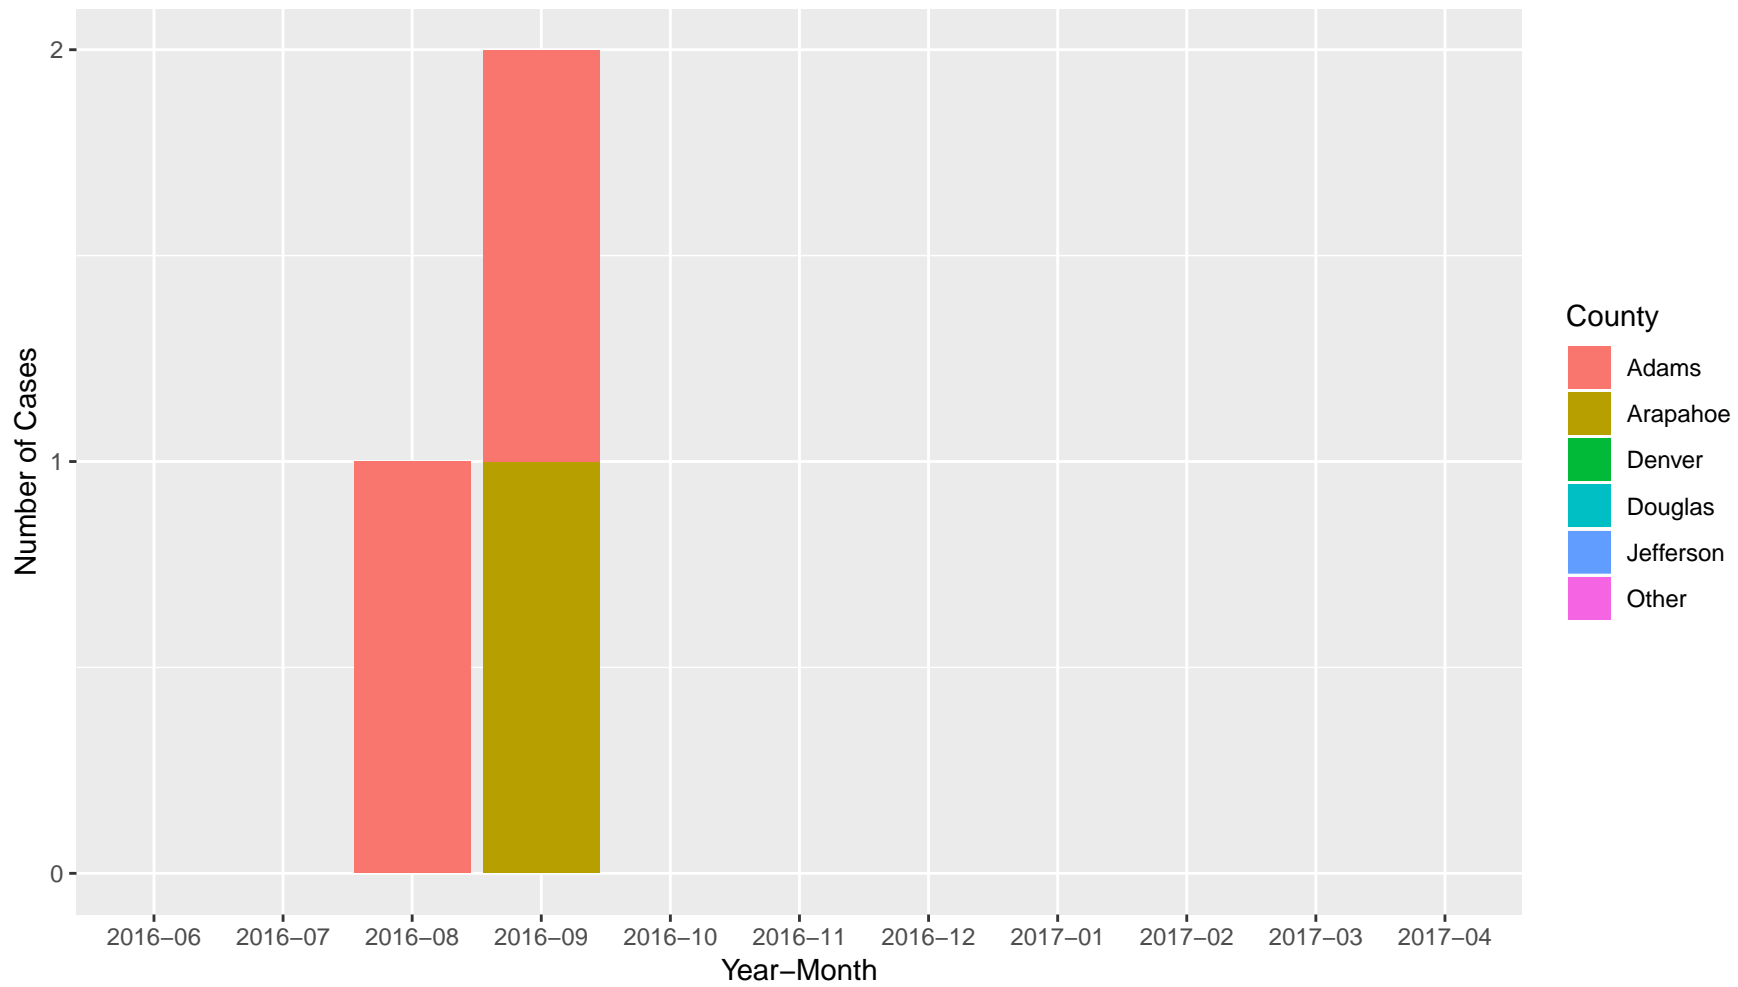



# emm6\_Cluster2

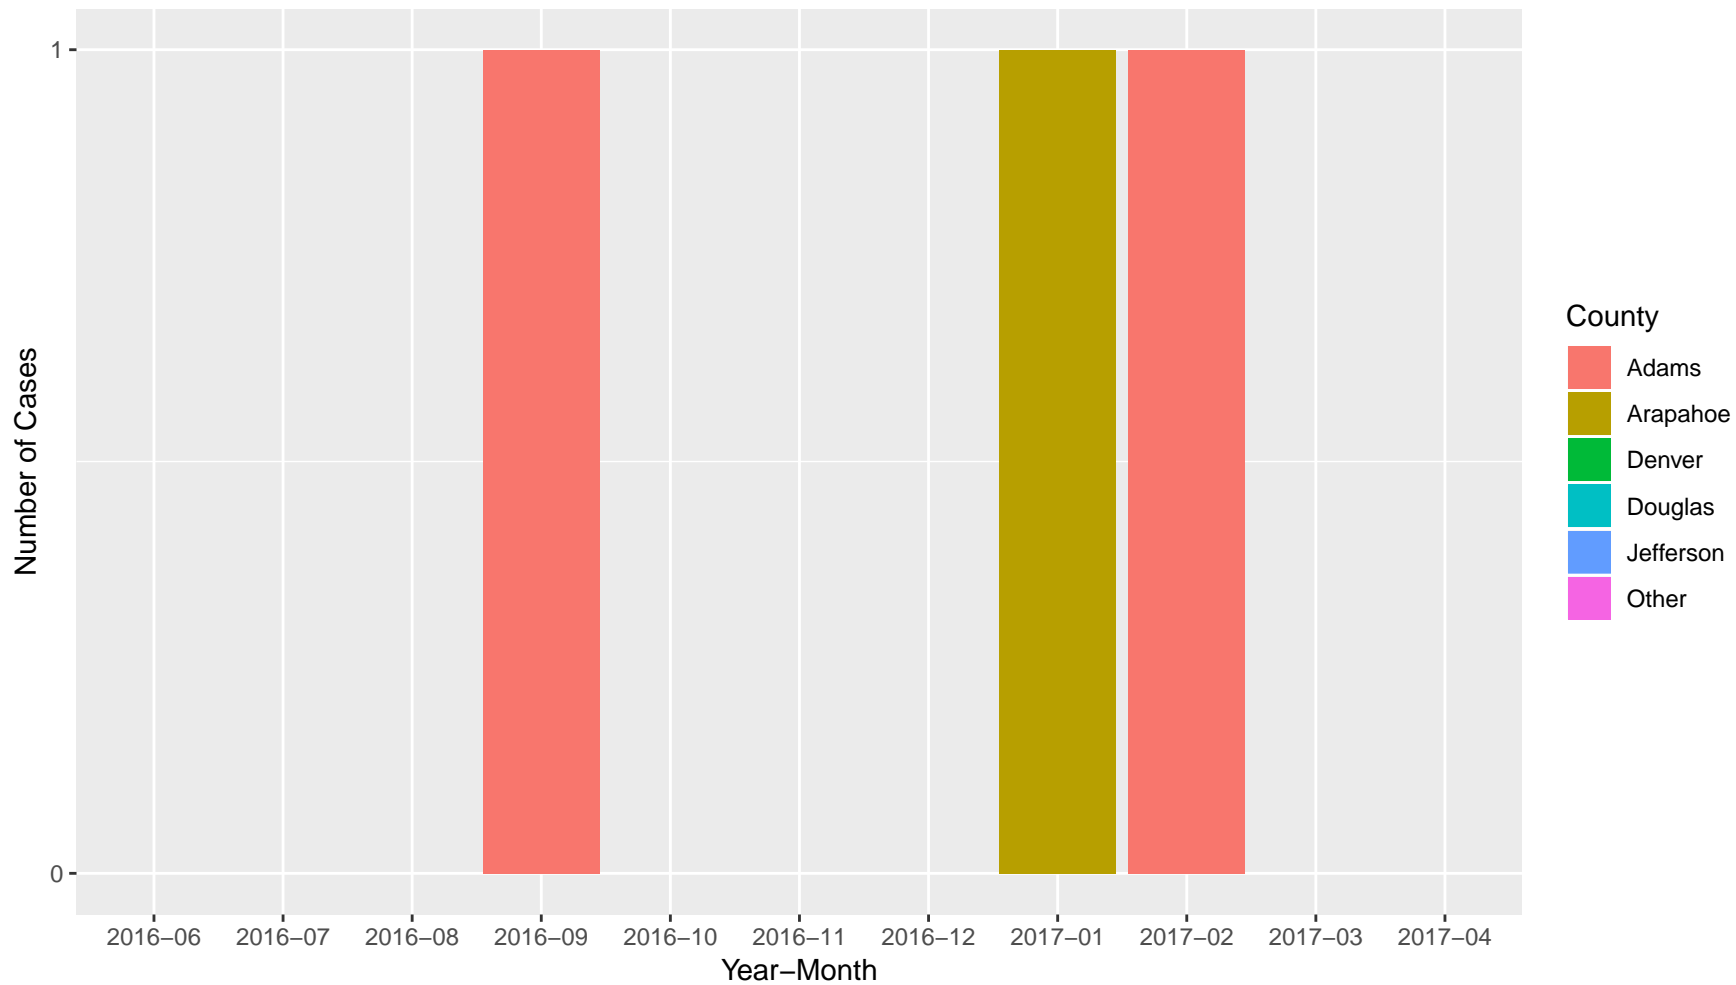

*emm77\_Cluster4*

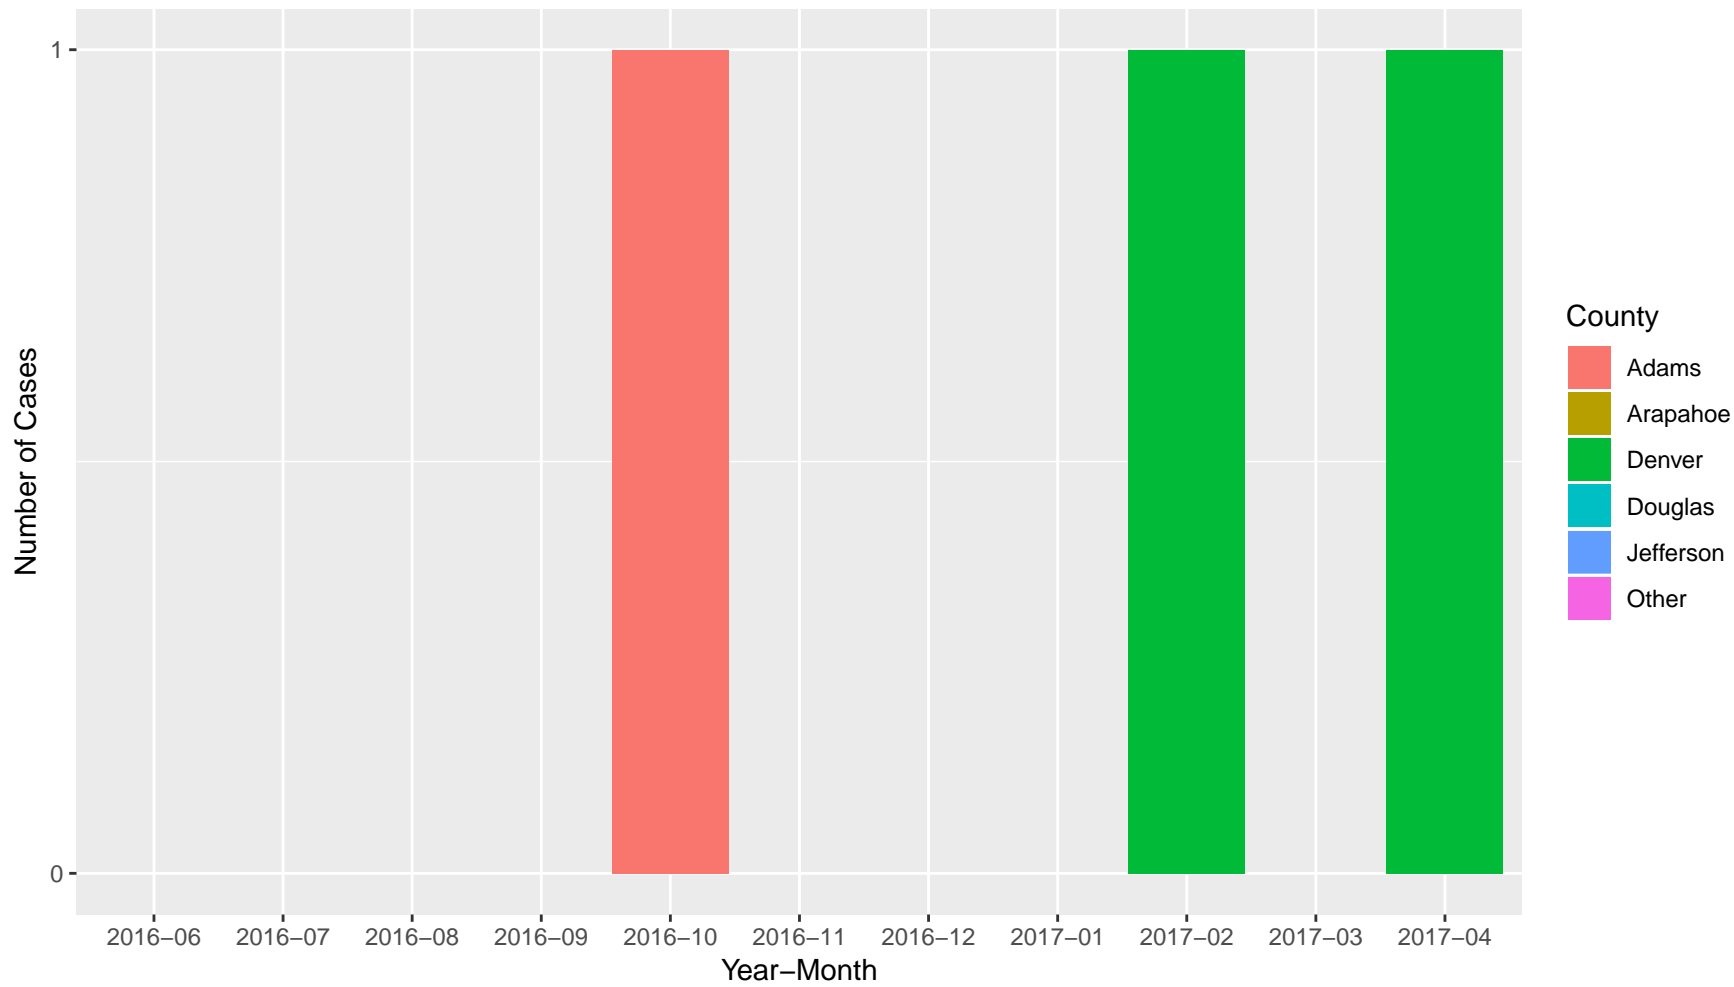

*emm82\_Cluster3*

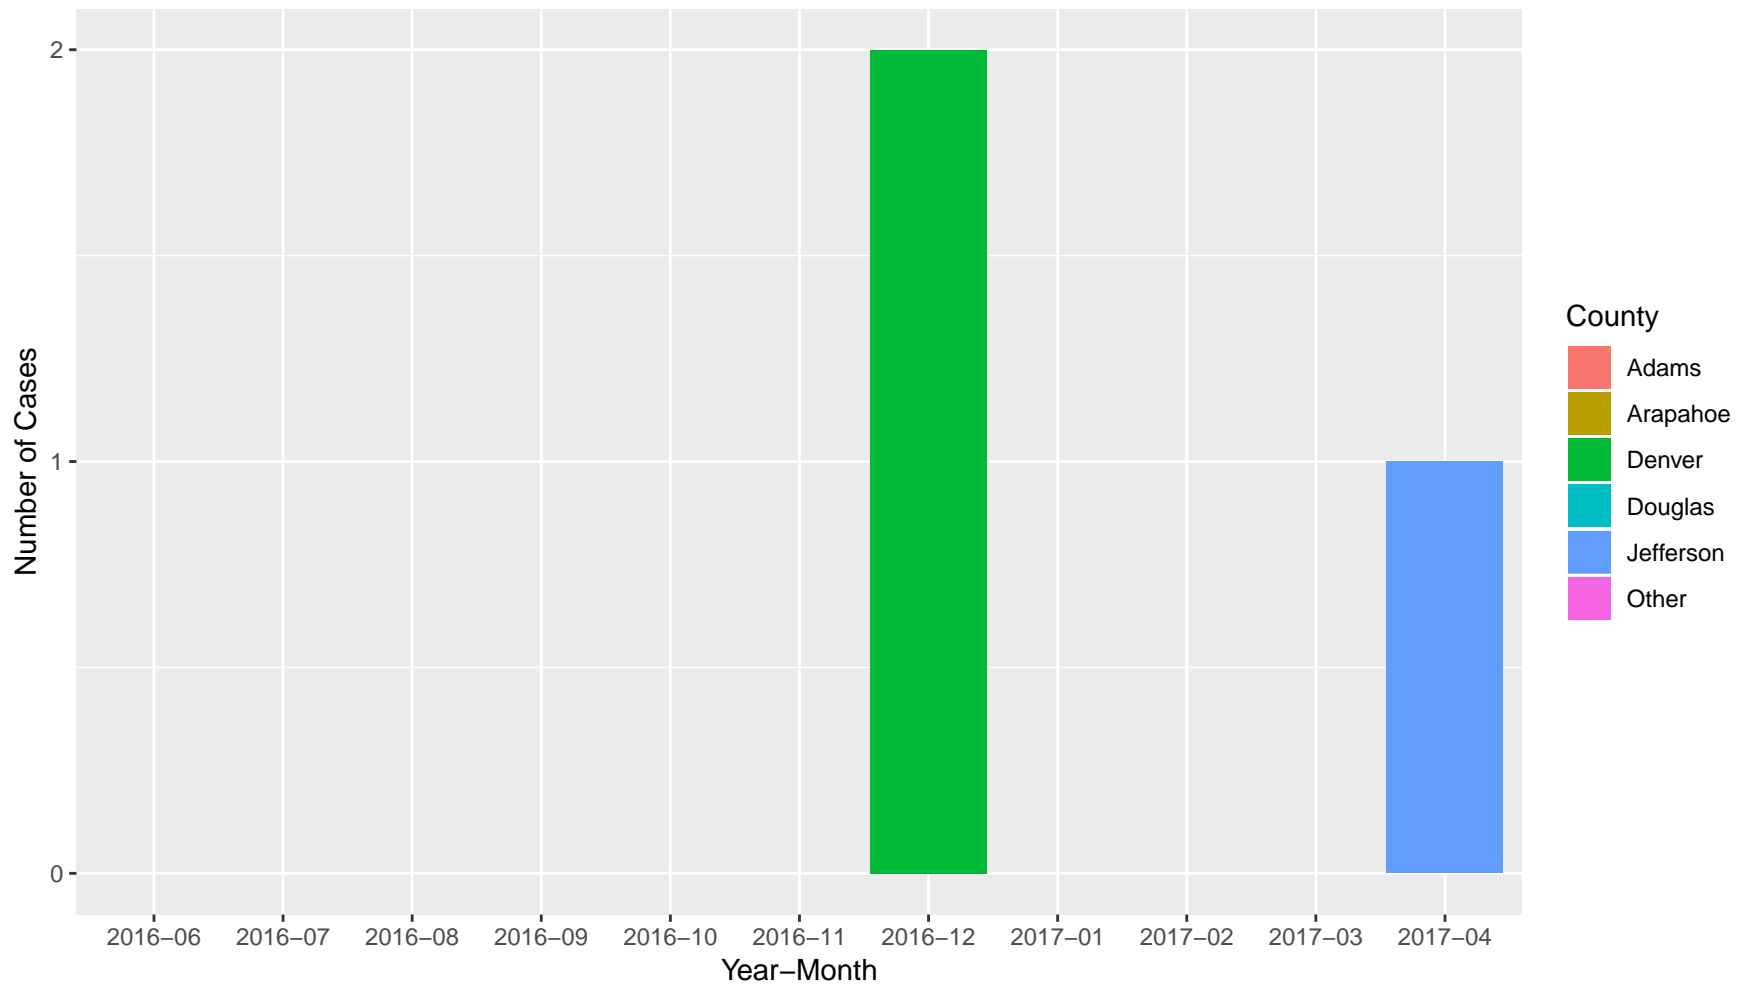

*emm87\_Cluster1*

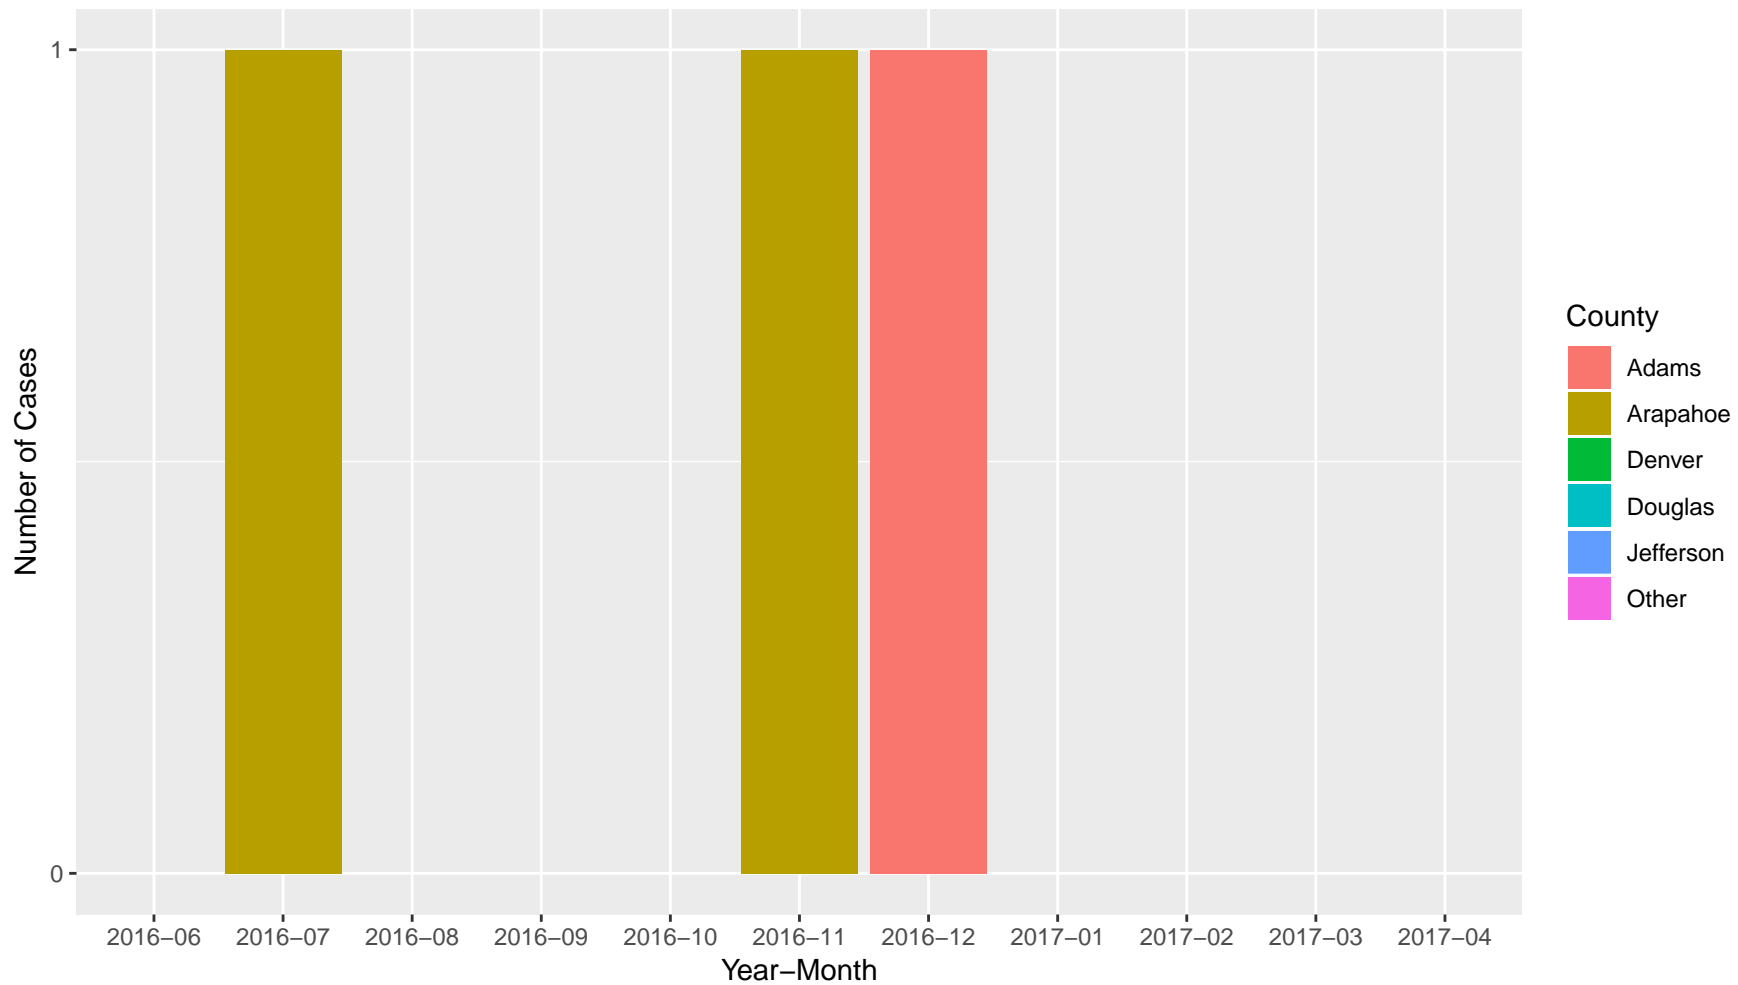

*emm87\_Cluster2*

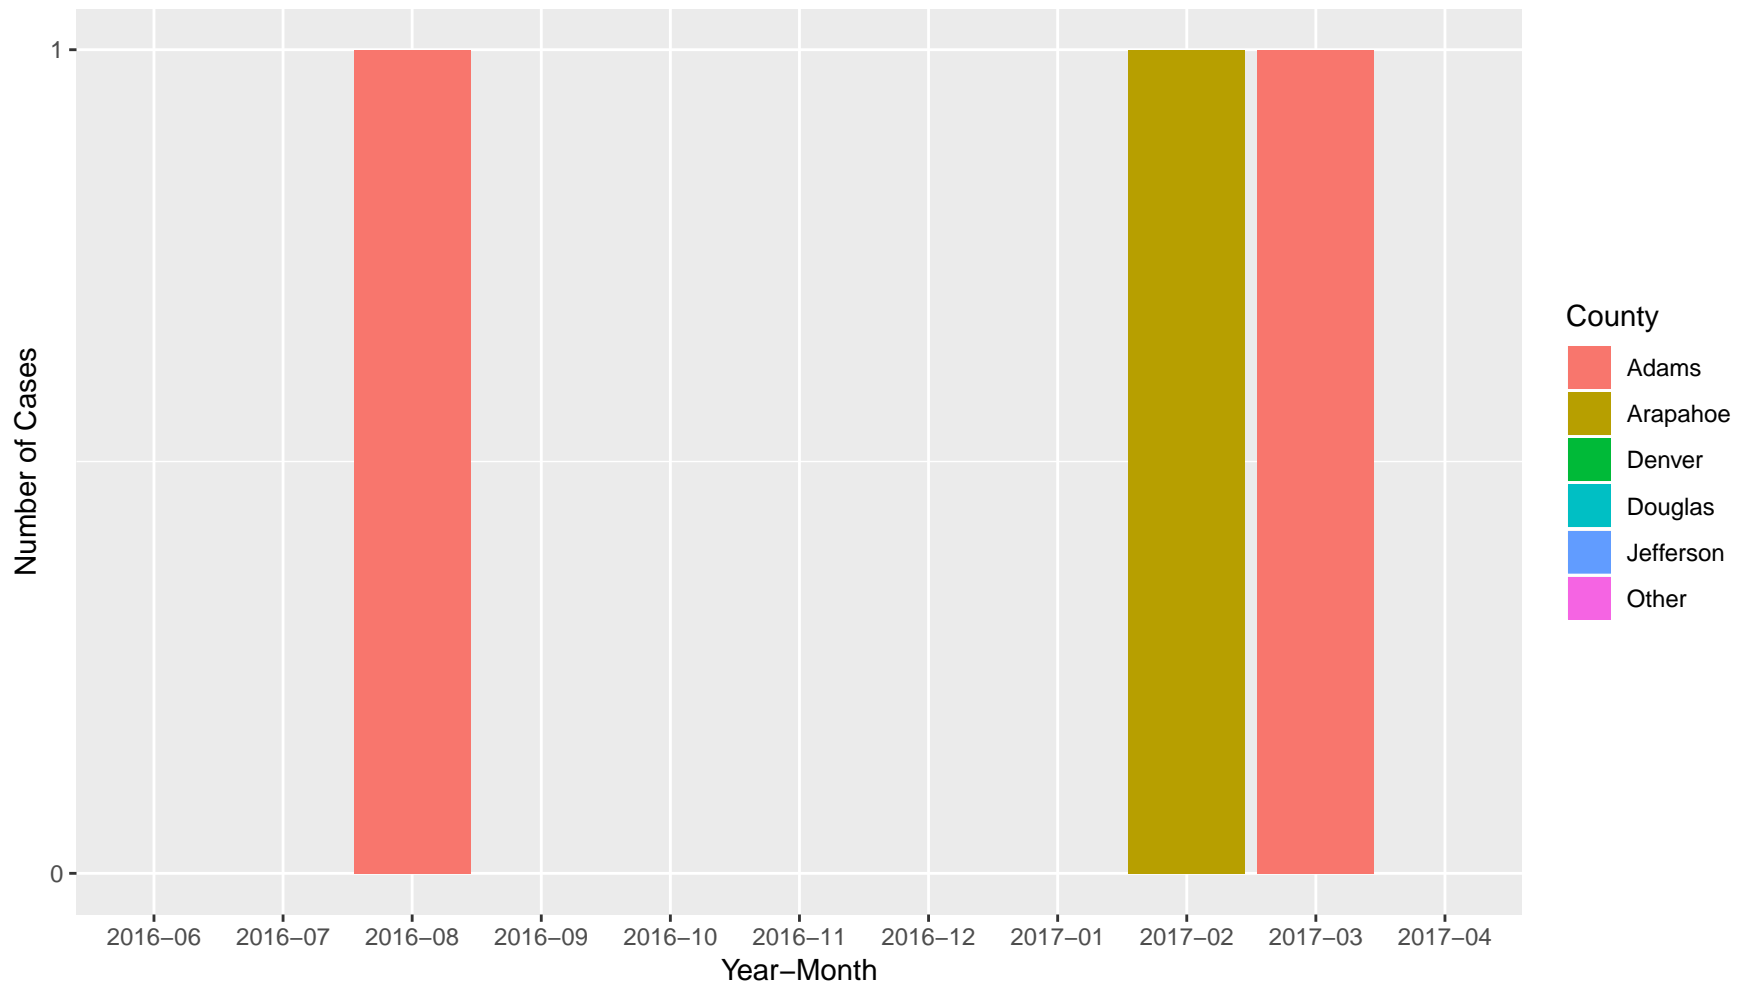

*emm87\_Cluster4*

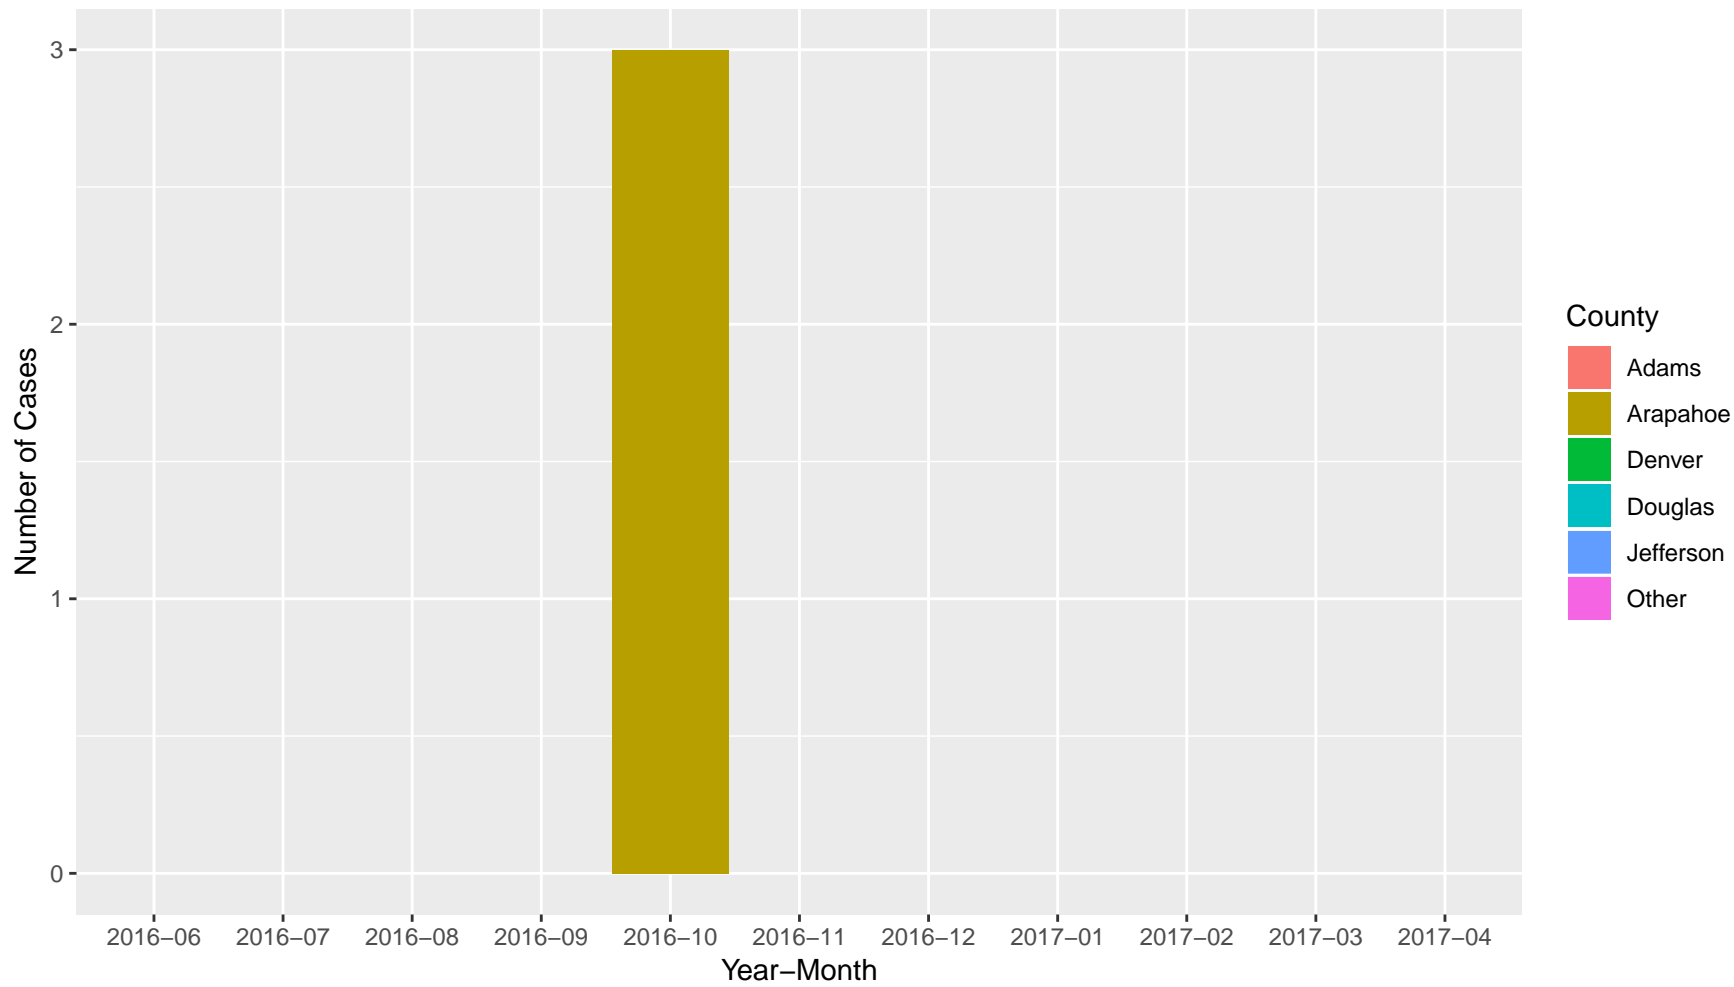

# emm89\_Cluster12

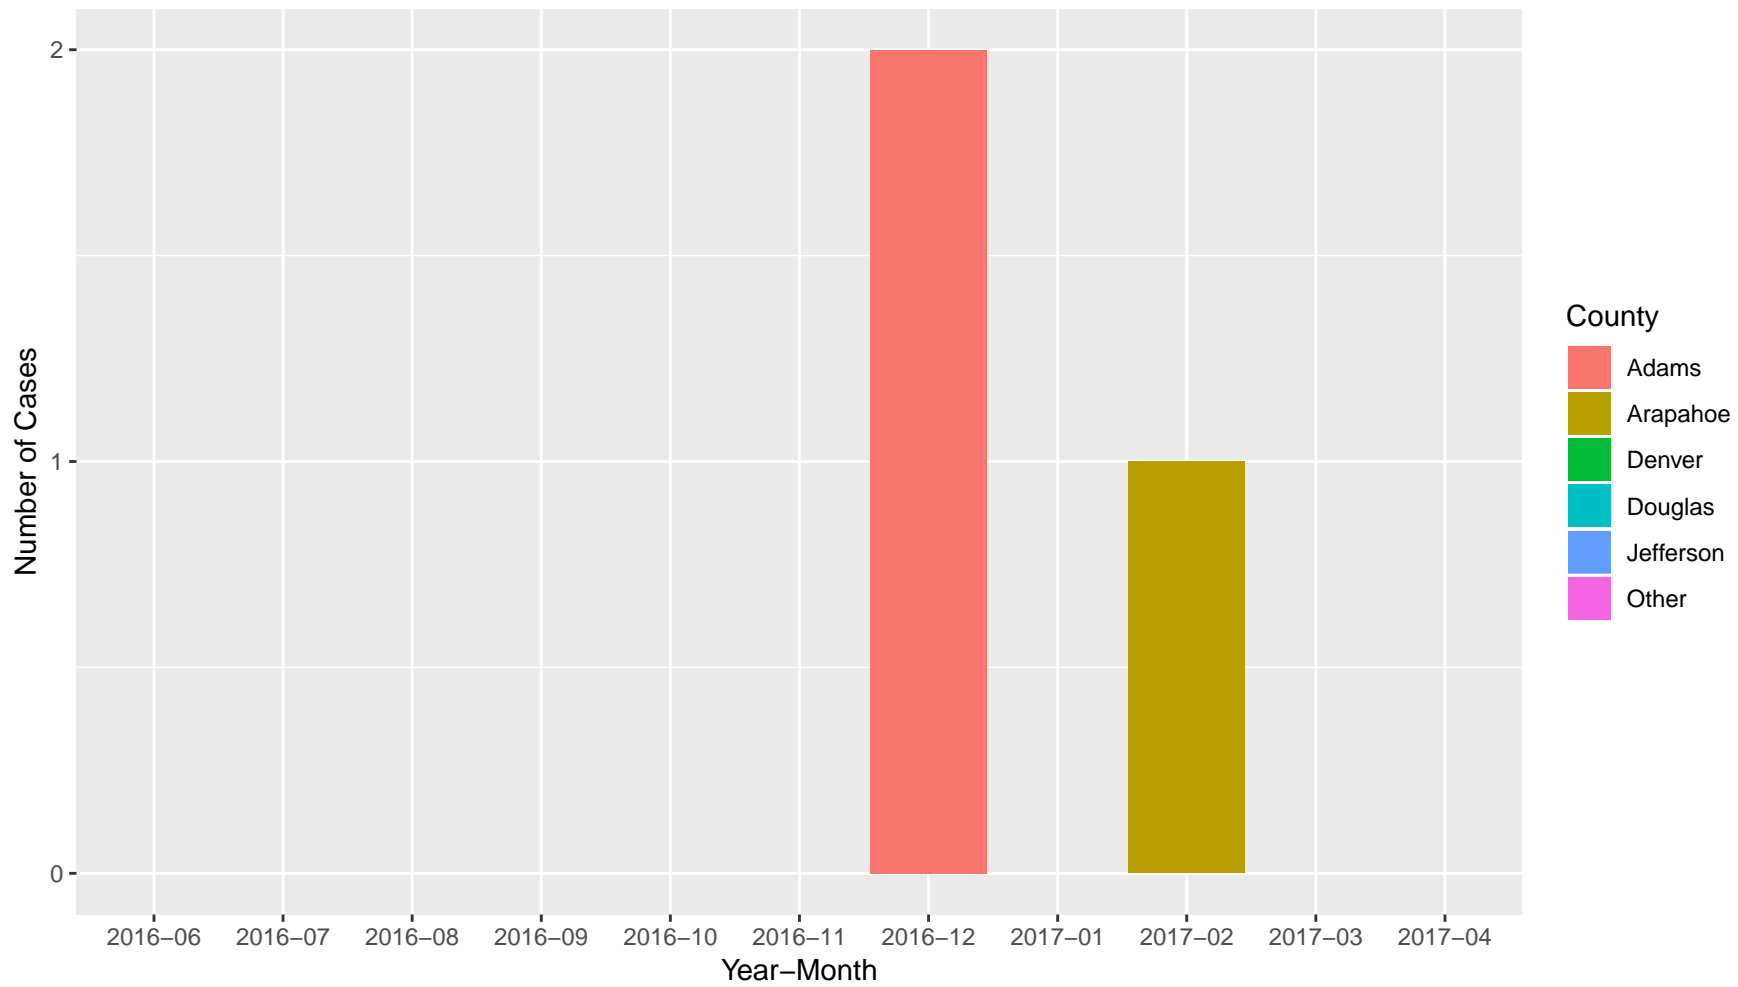

# emm1\_Cluster19

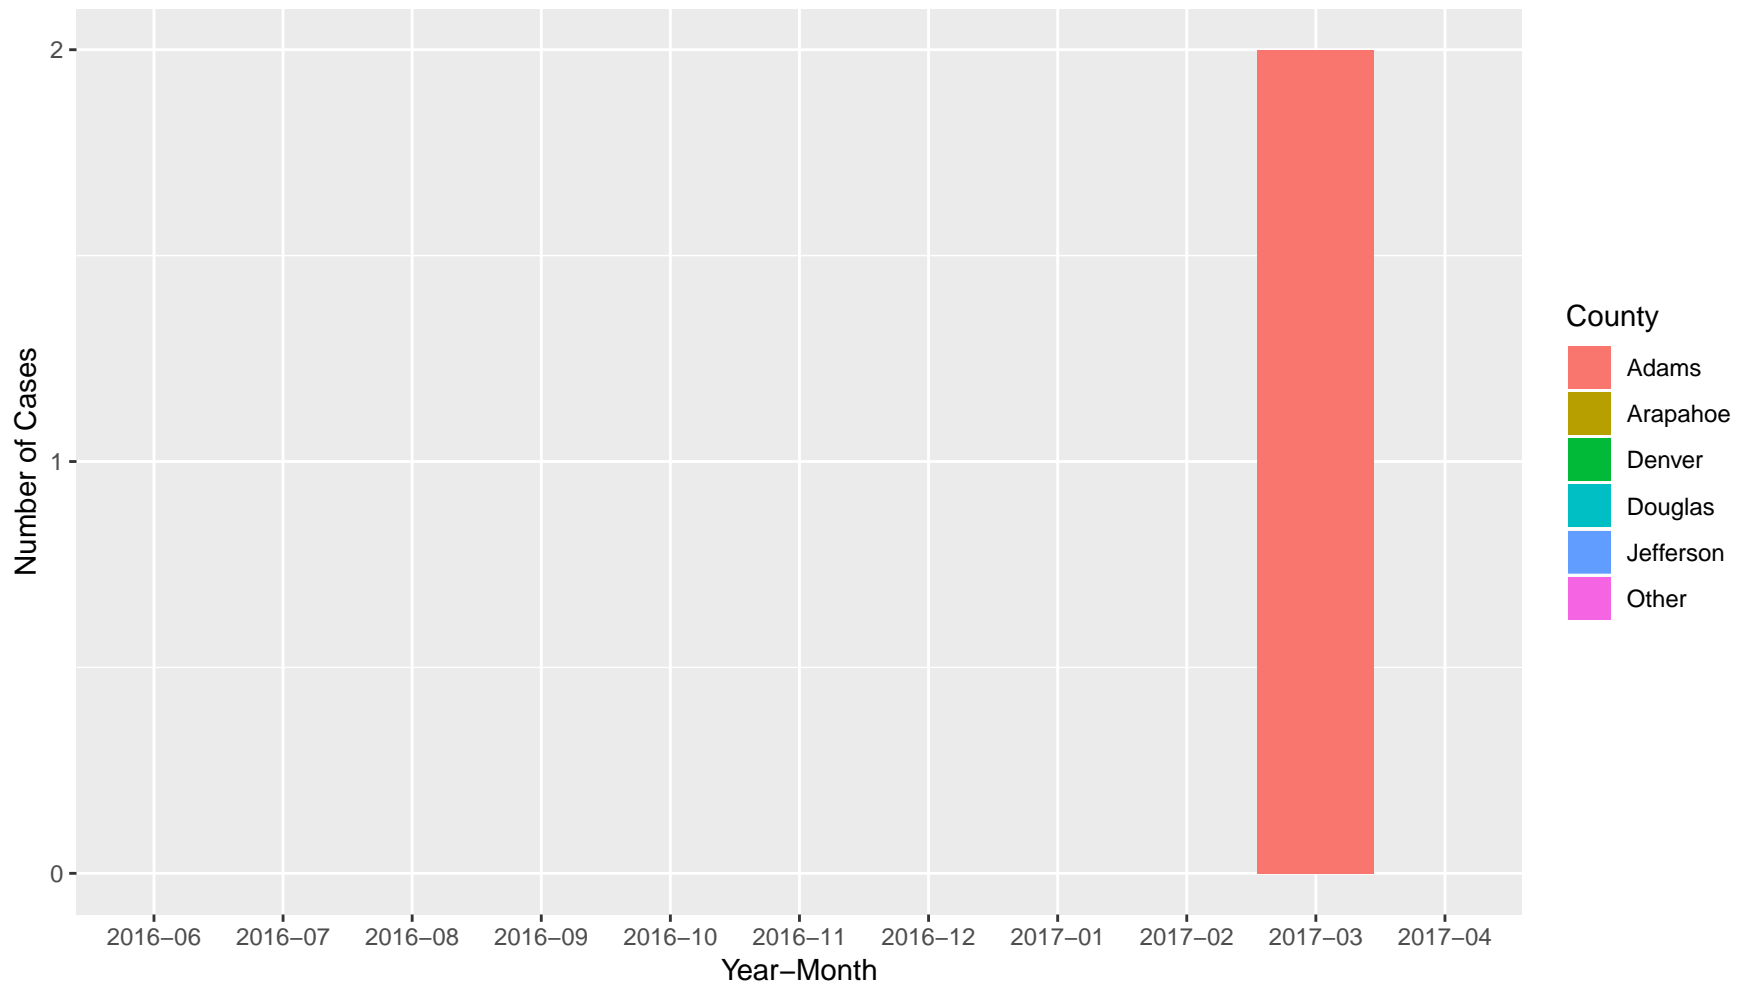



*emm1\_Cluster20*

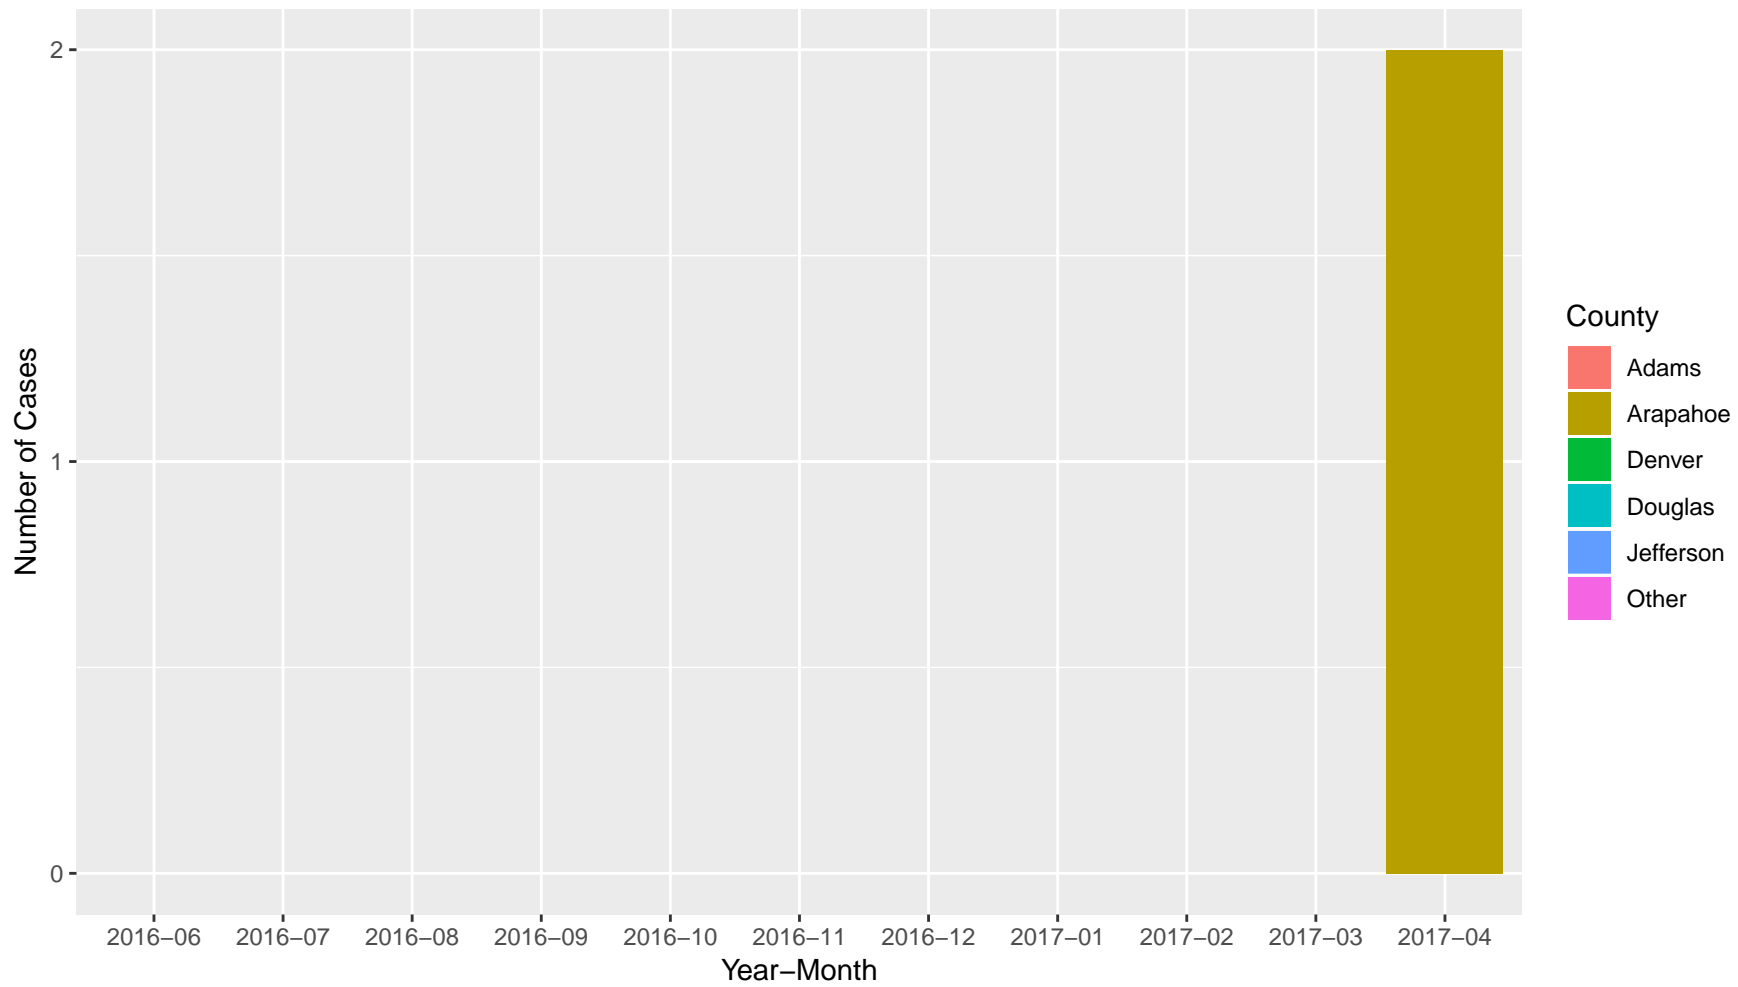

*emm1\_Cluster21*

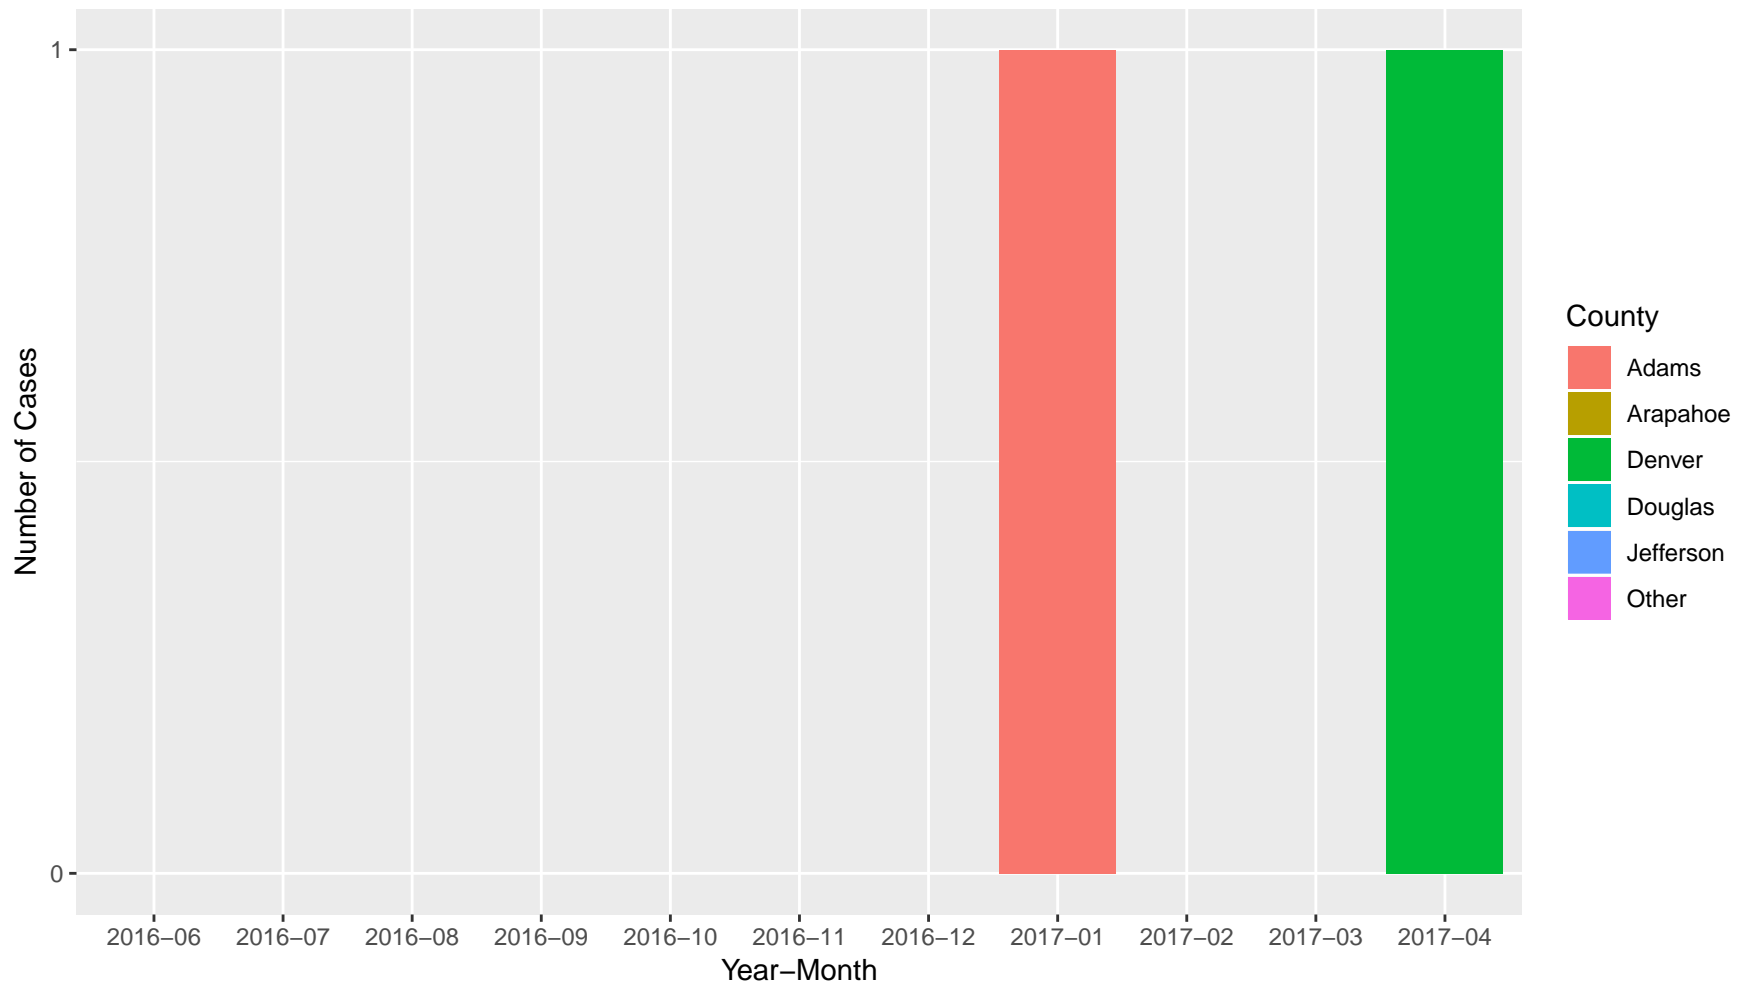

*emm1\_Cluster25*

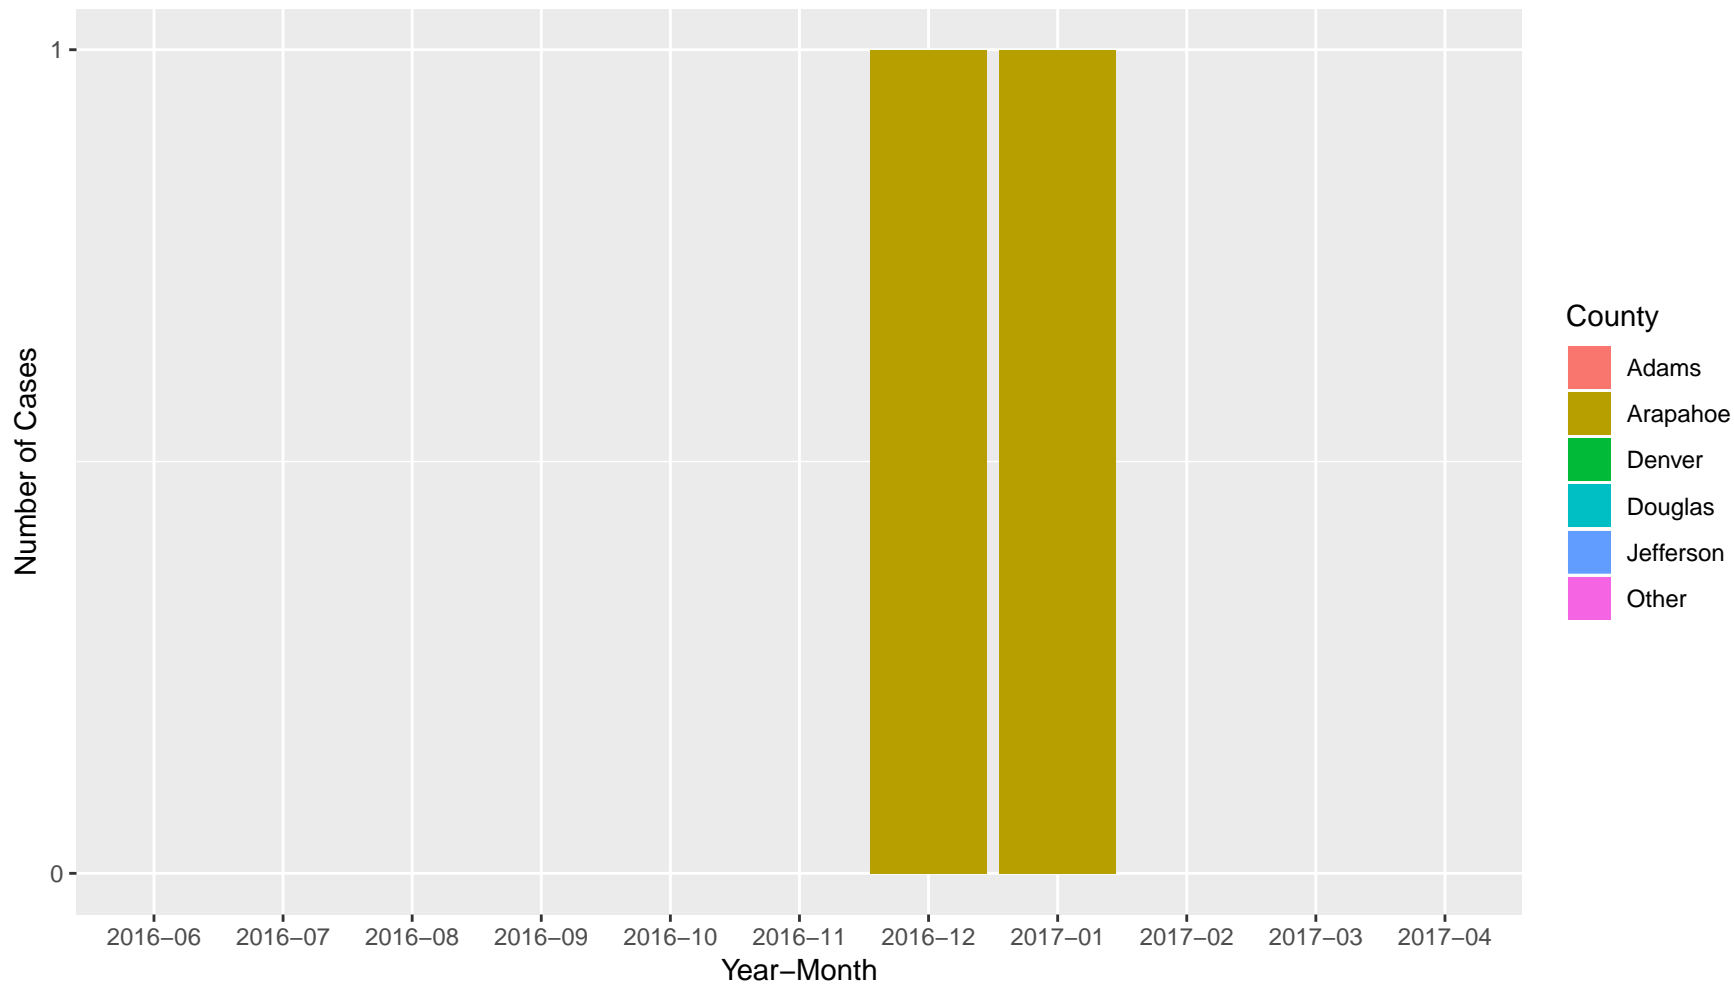

# emm1\_Cluster26

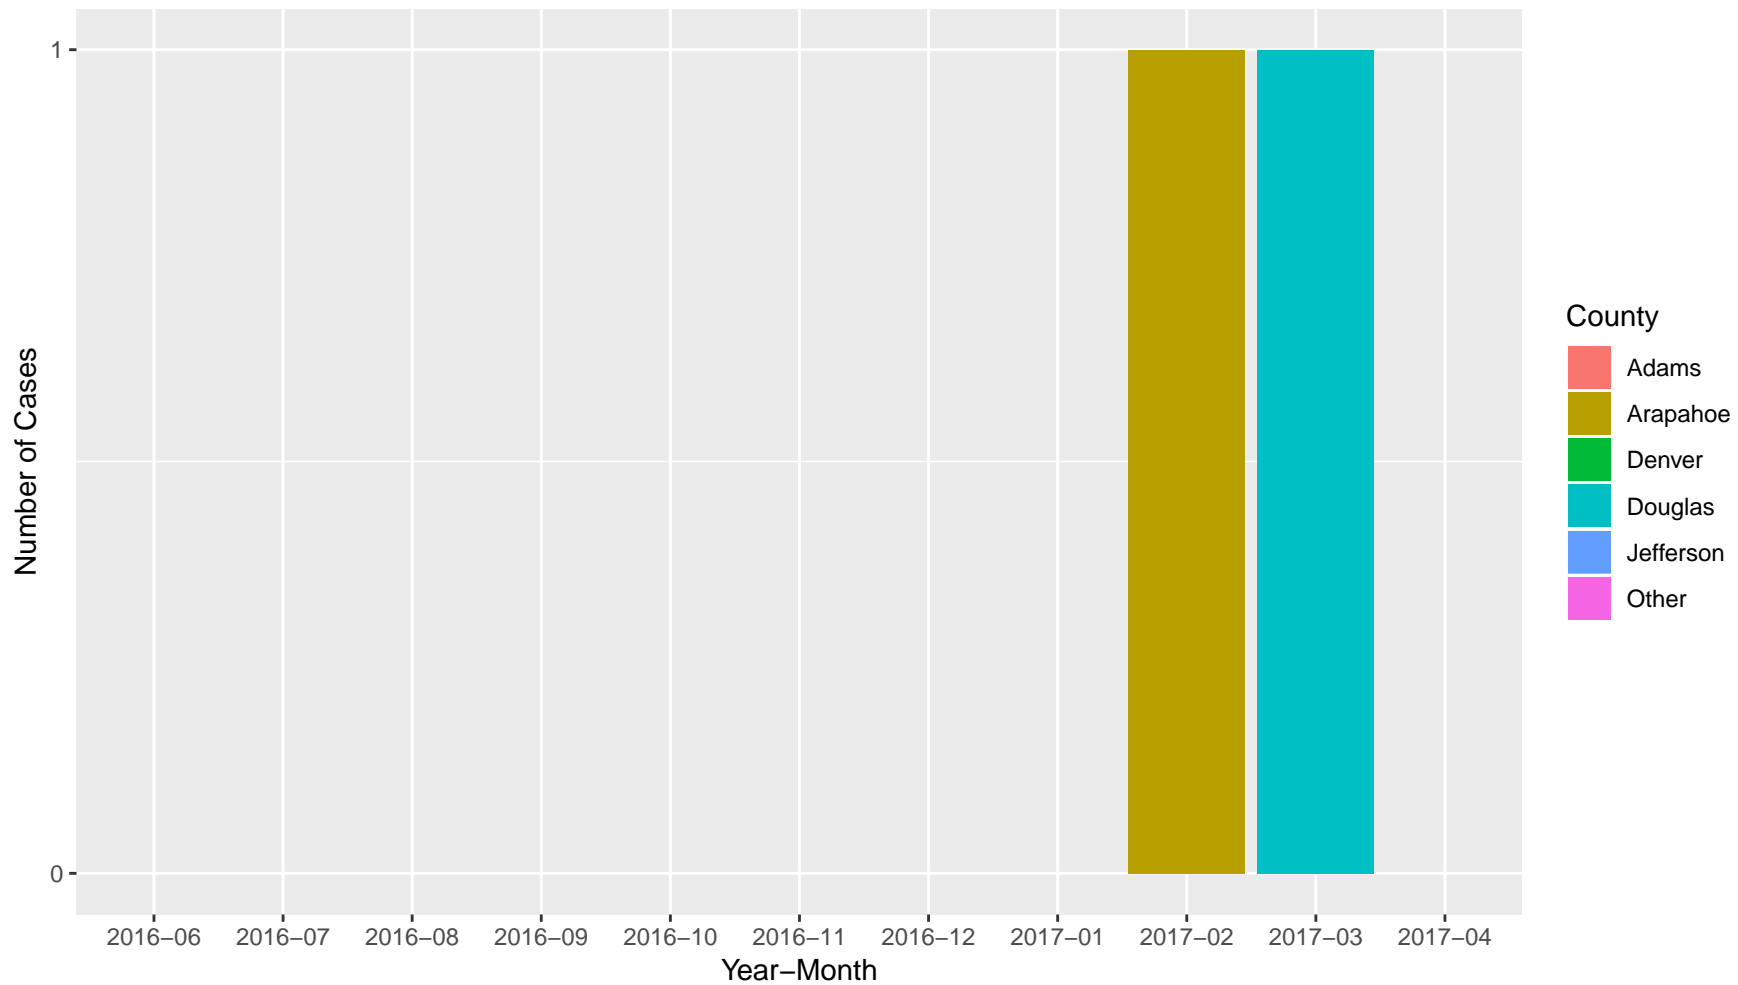

# emm1\_Cluster8

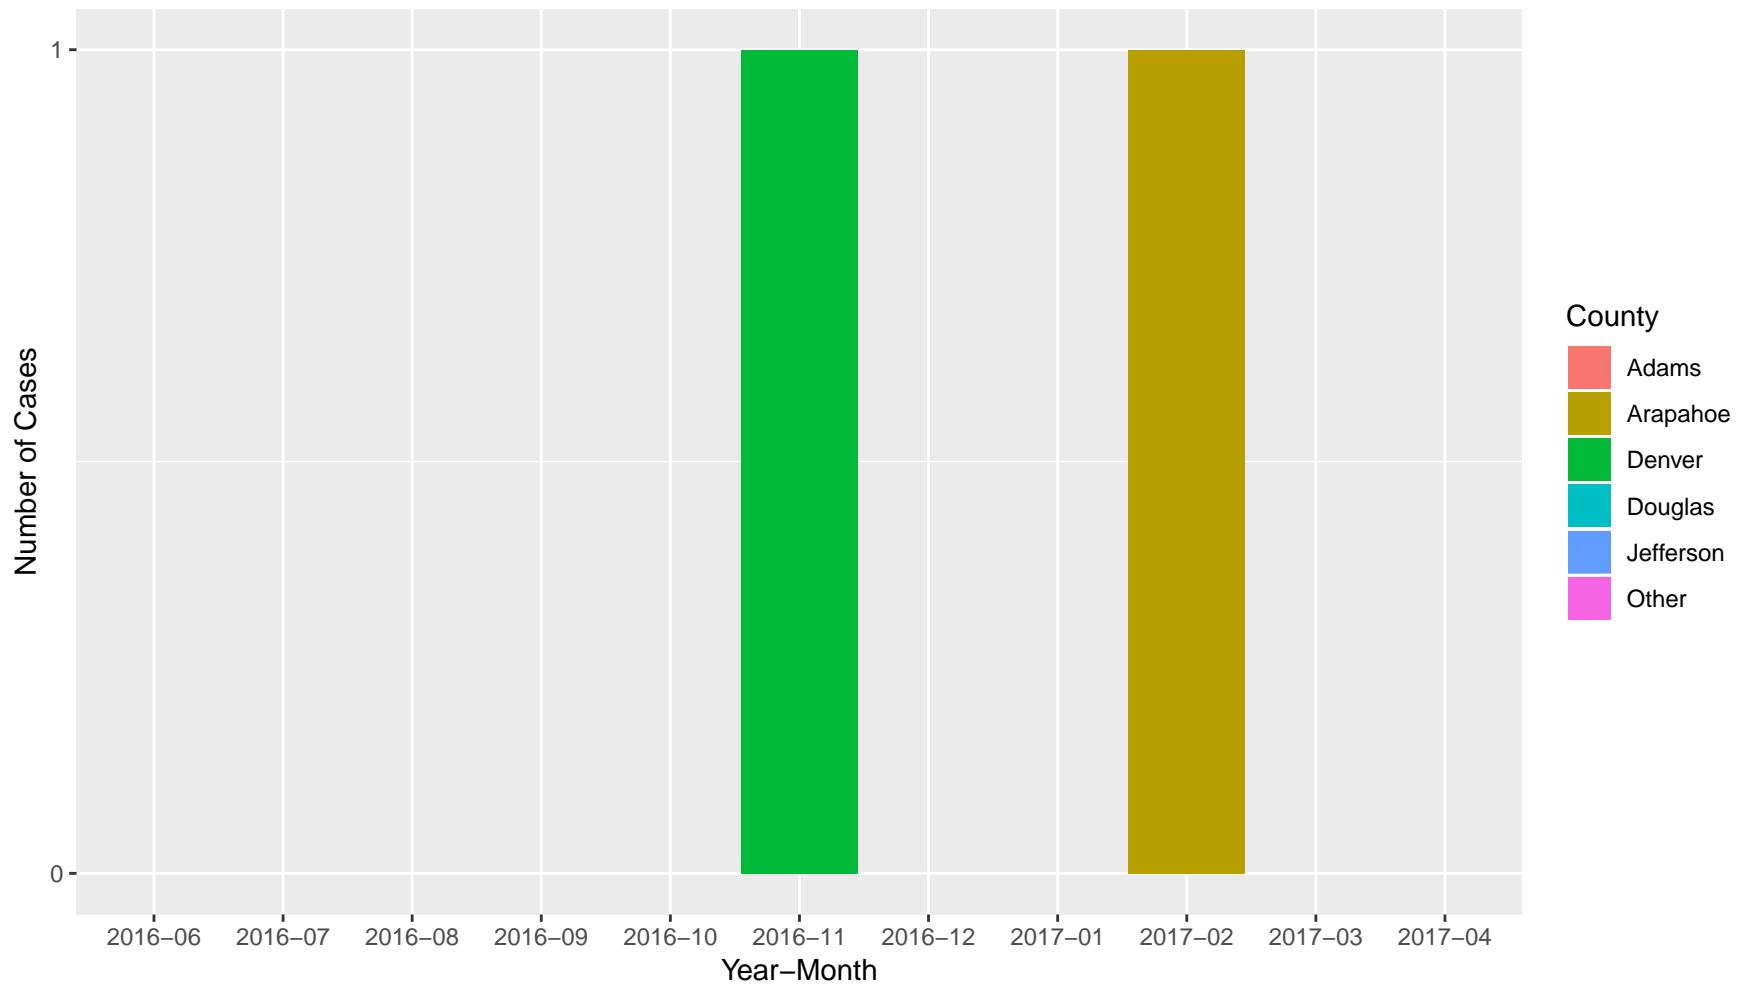

*emm11\_Cluster4*

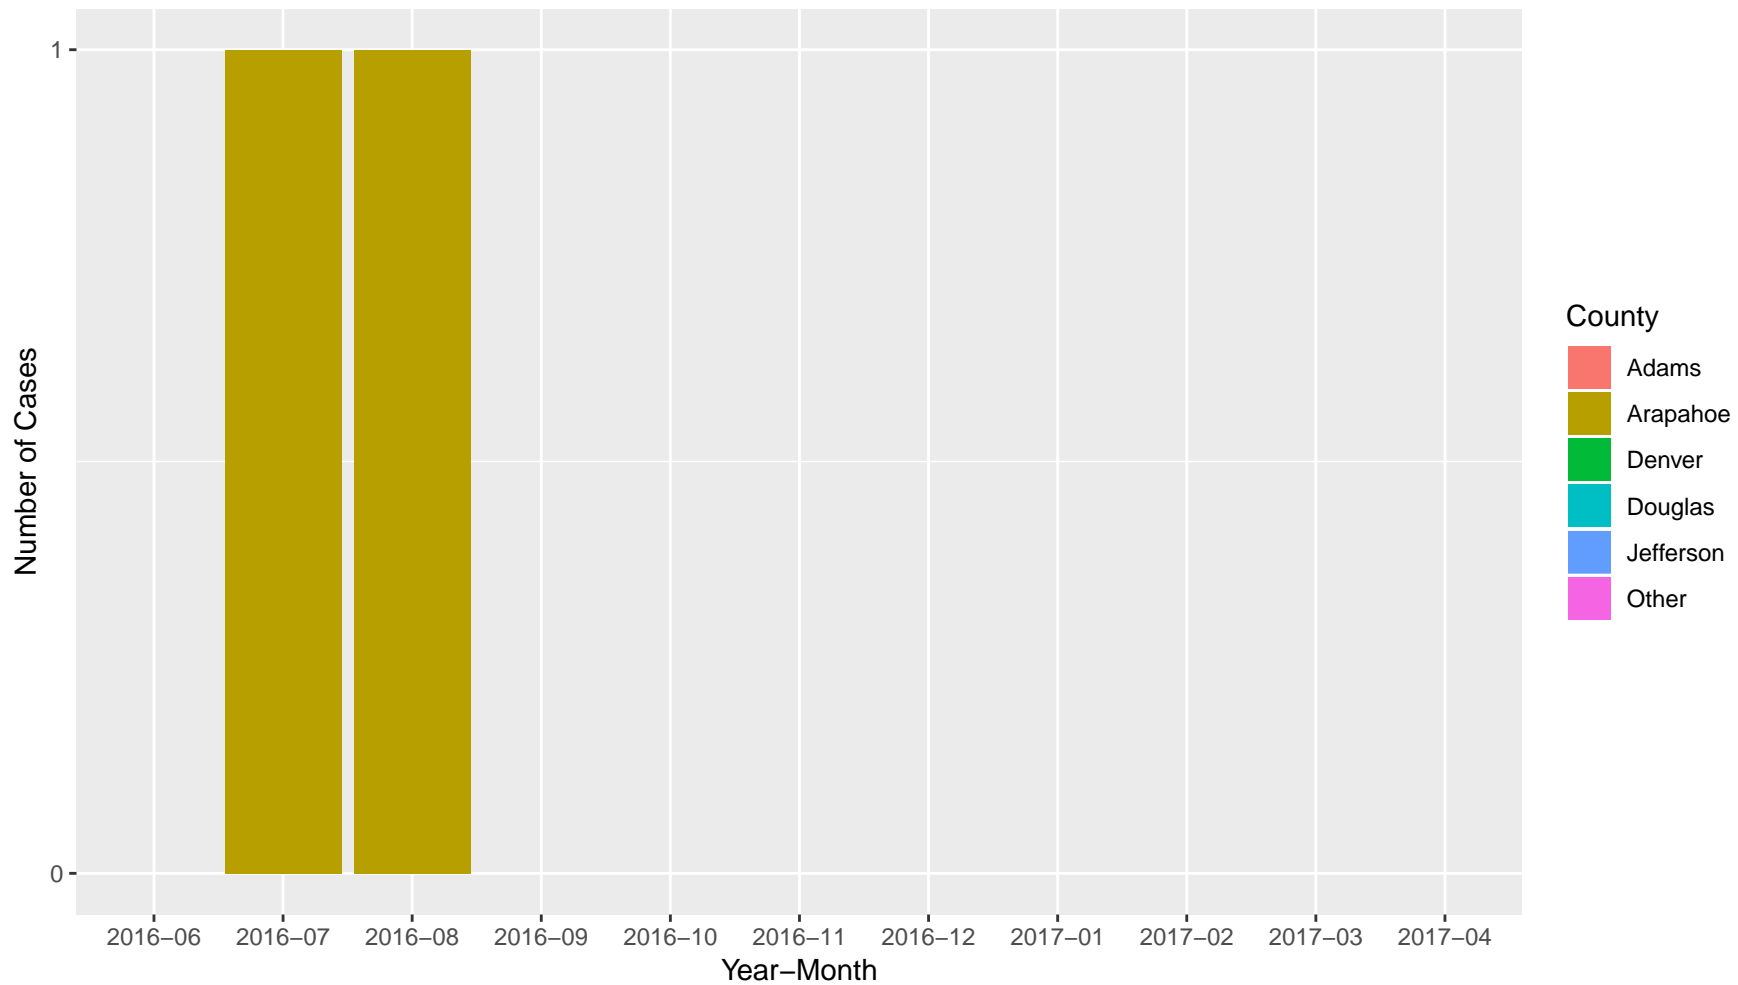

*emm11\_Cluster7*

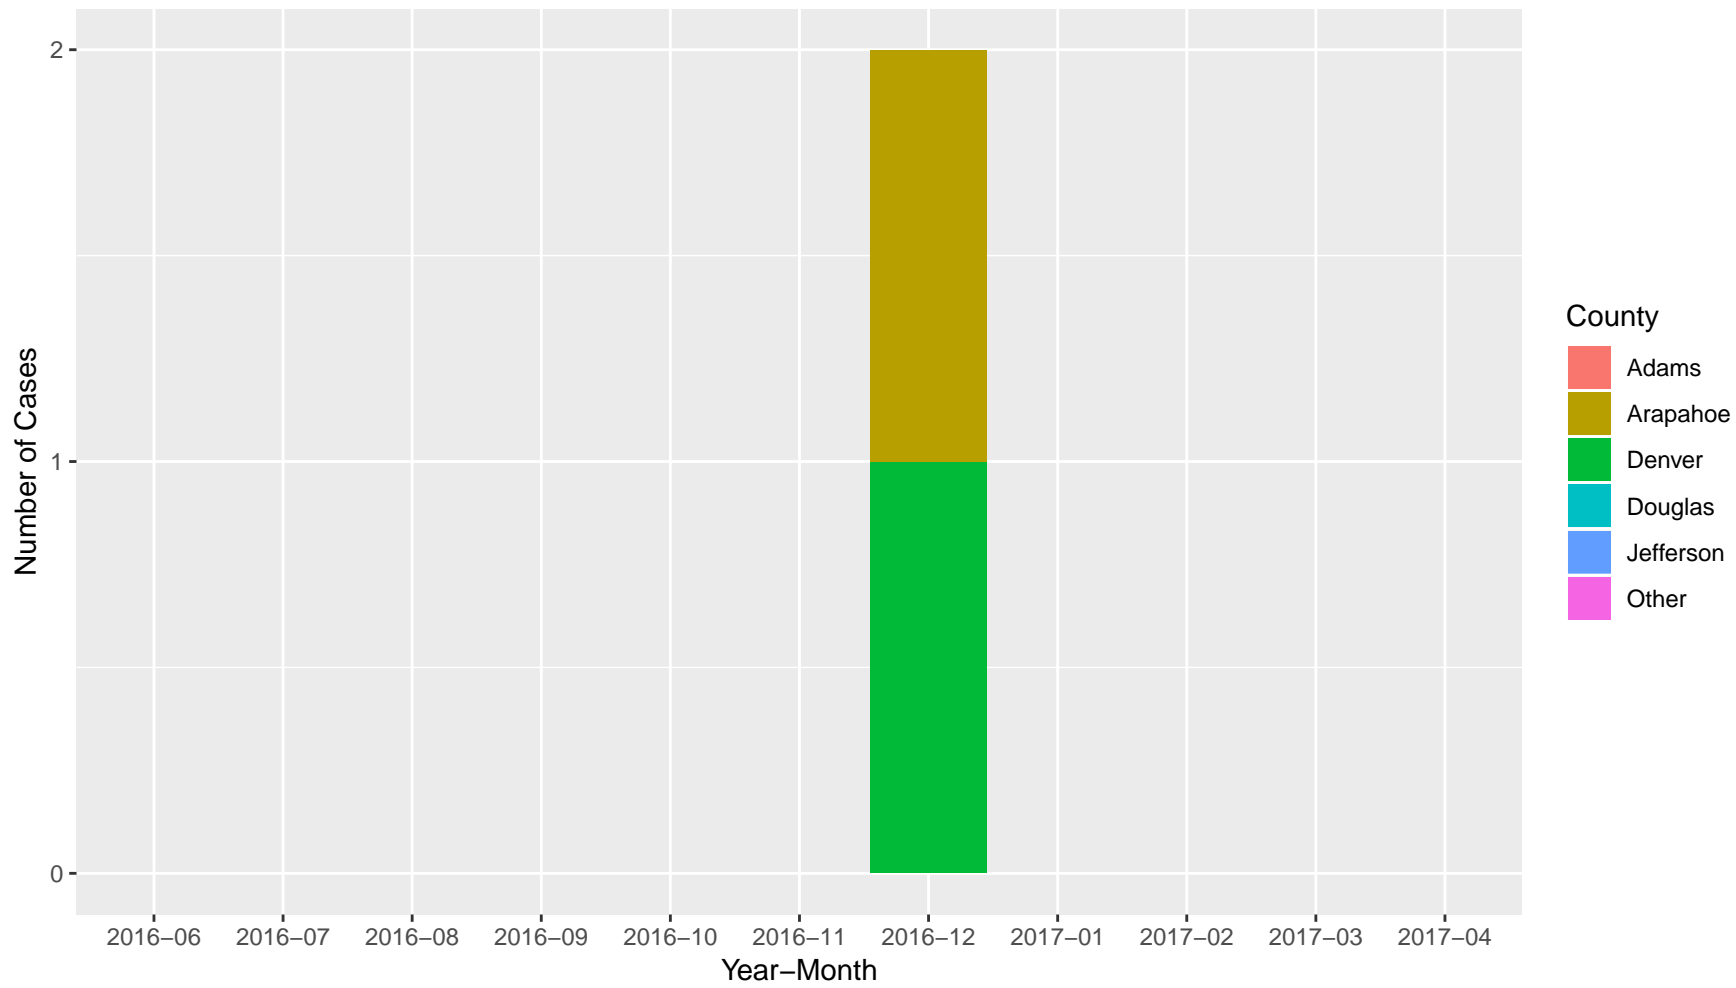

*emm12\_Cluster7*

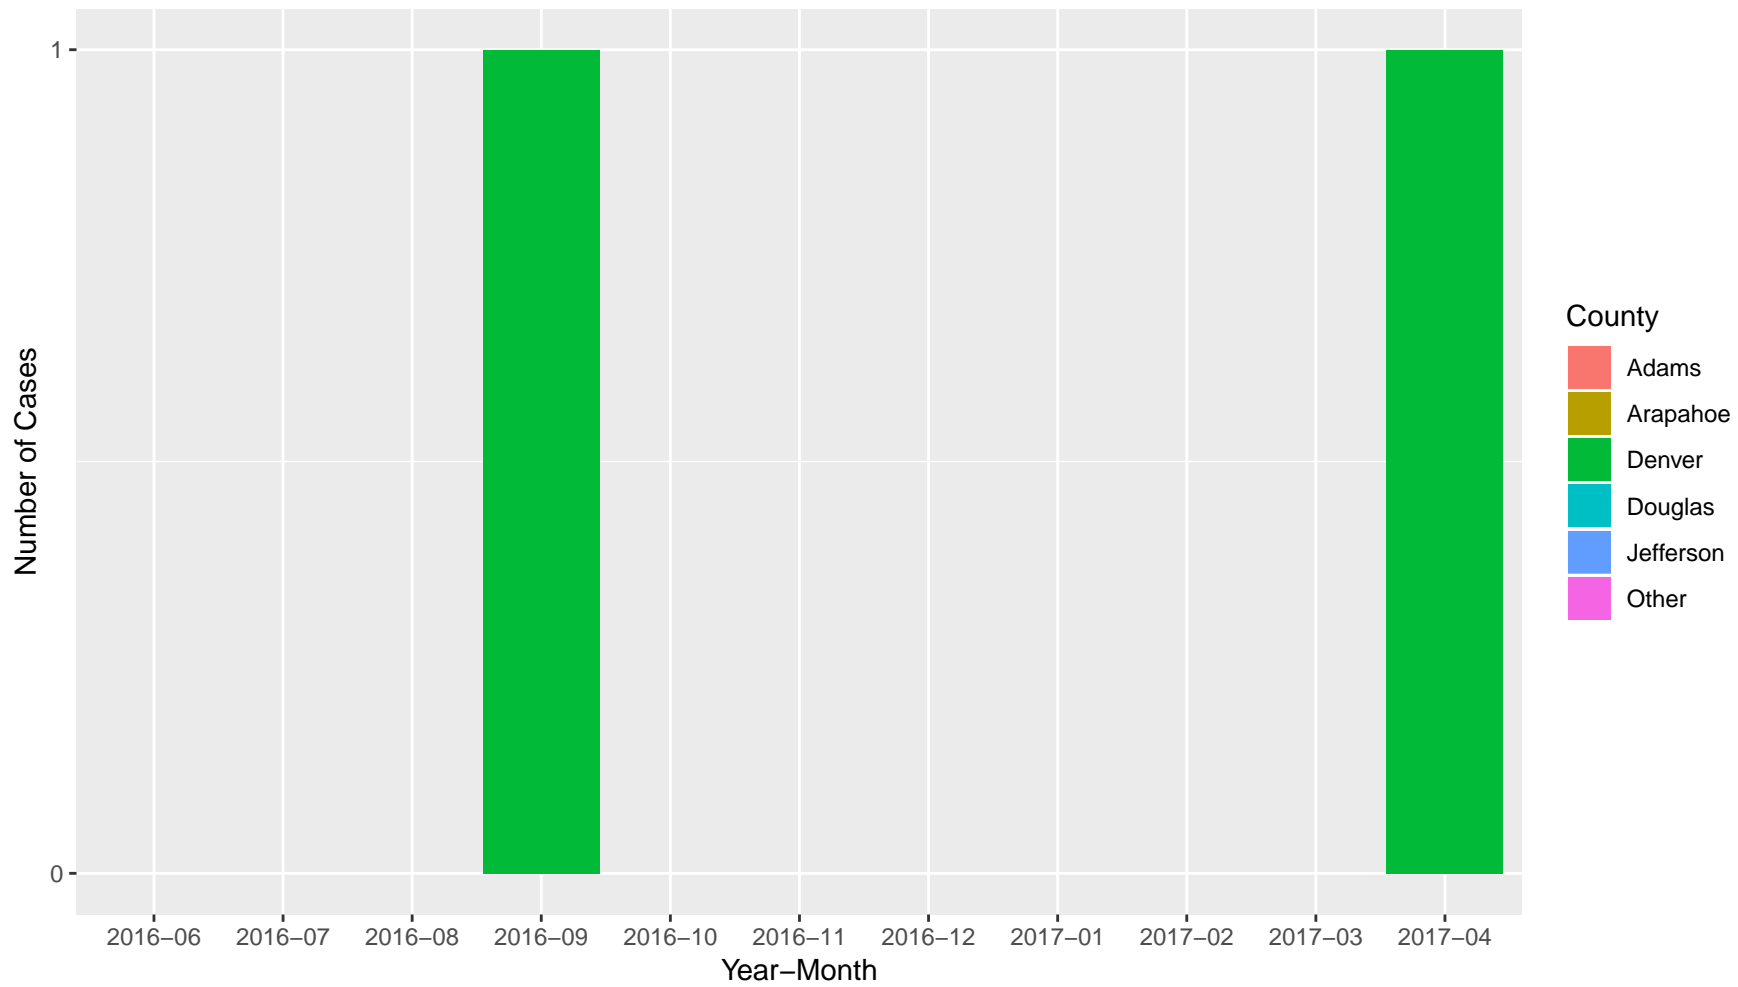



# emm169\_Cluster1

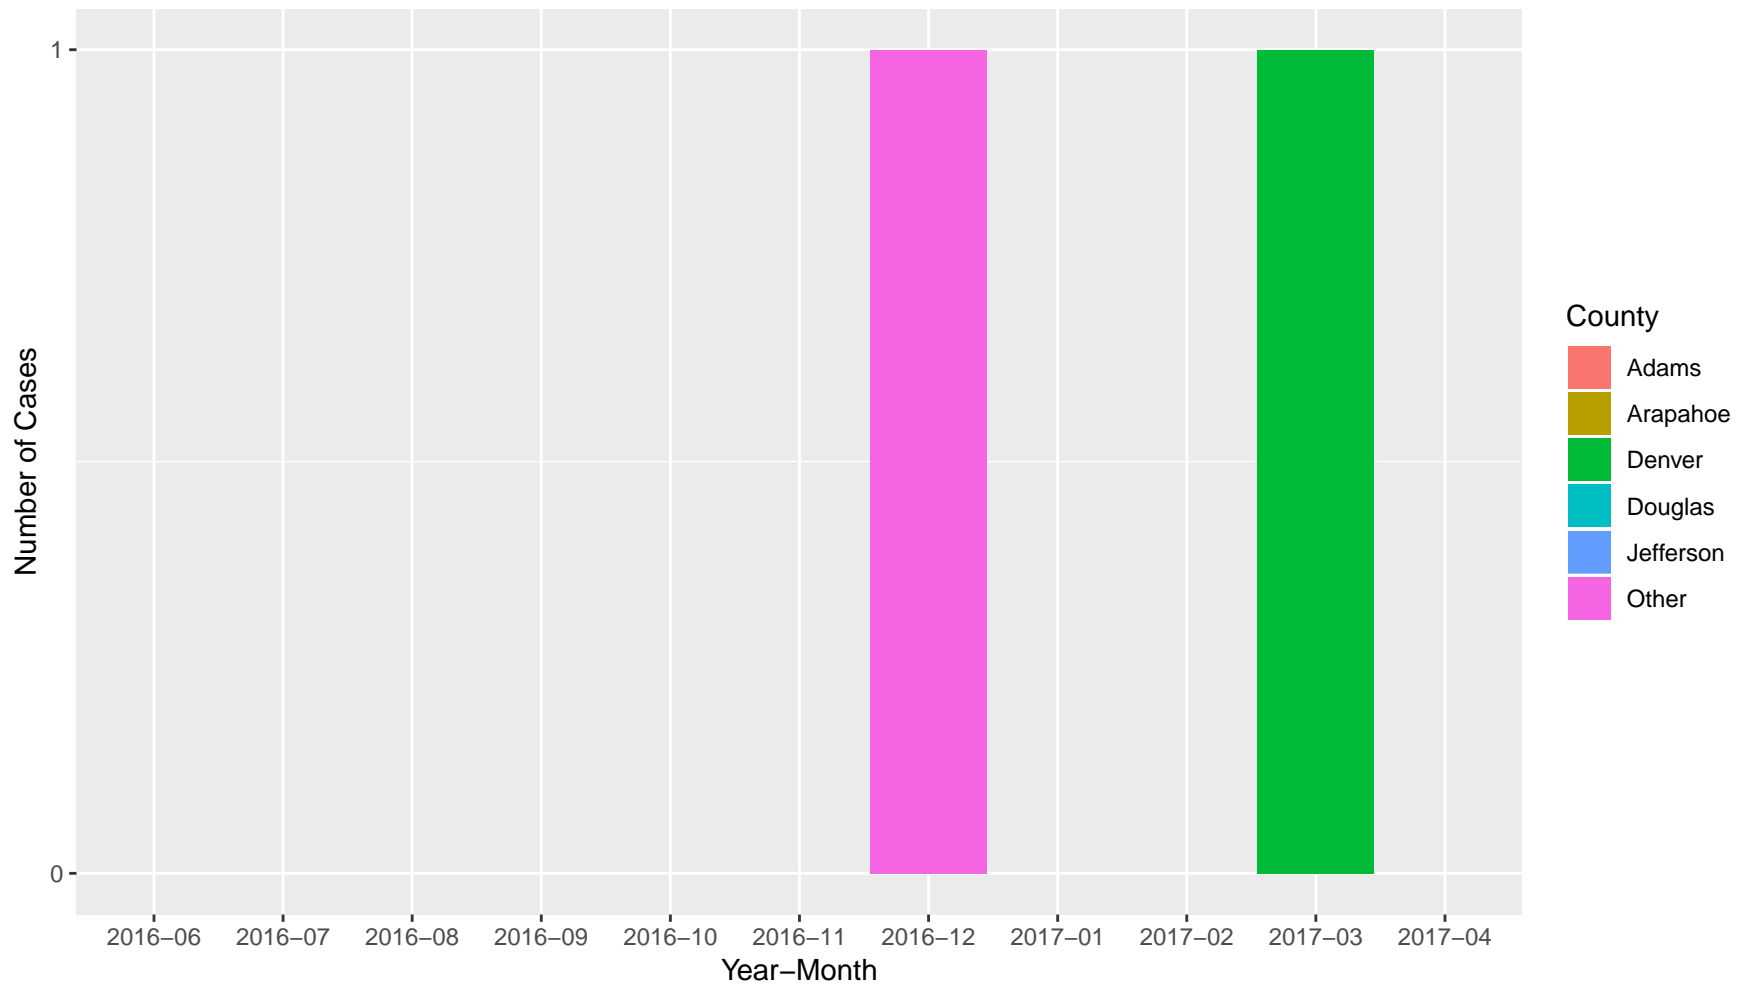

*emm2\_Cluster1*

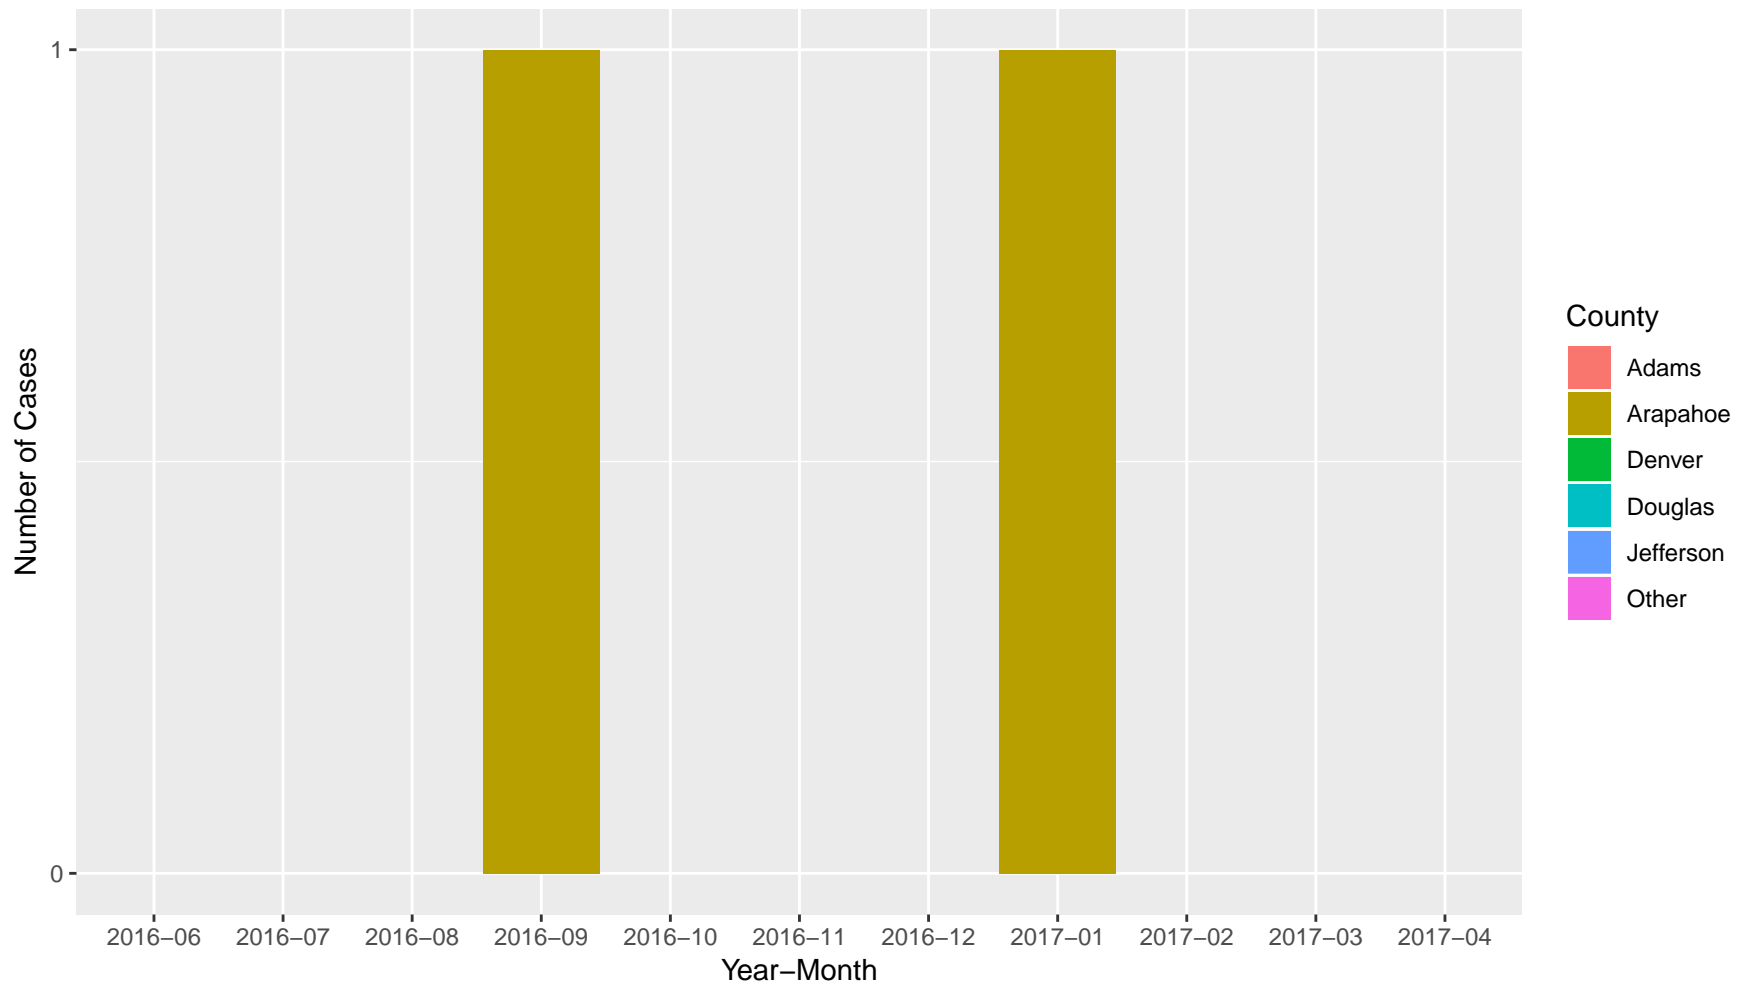

*emm2\_Cluster11*

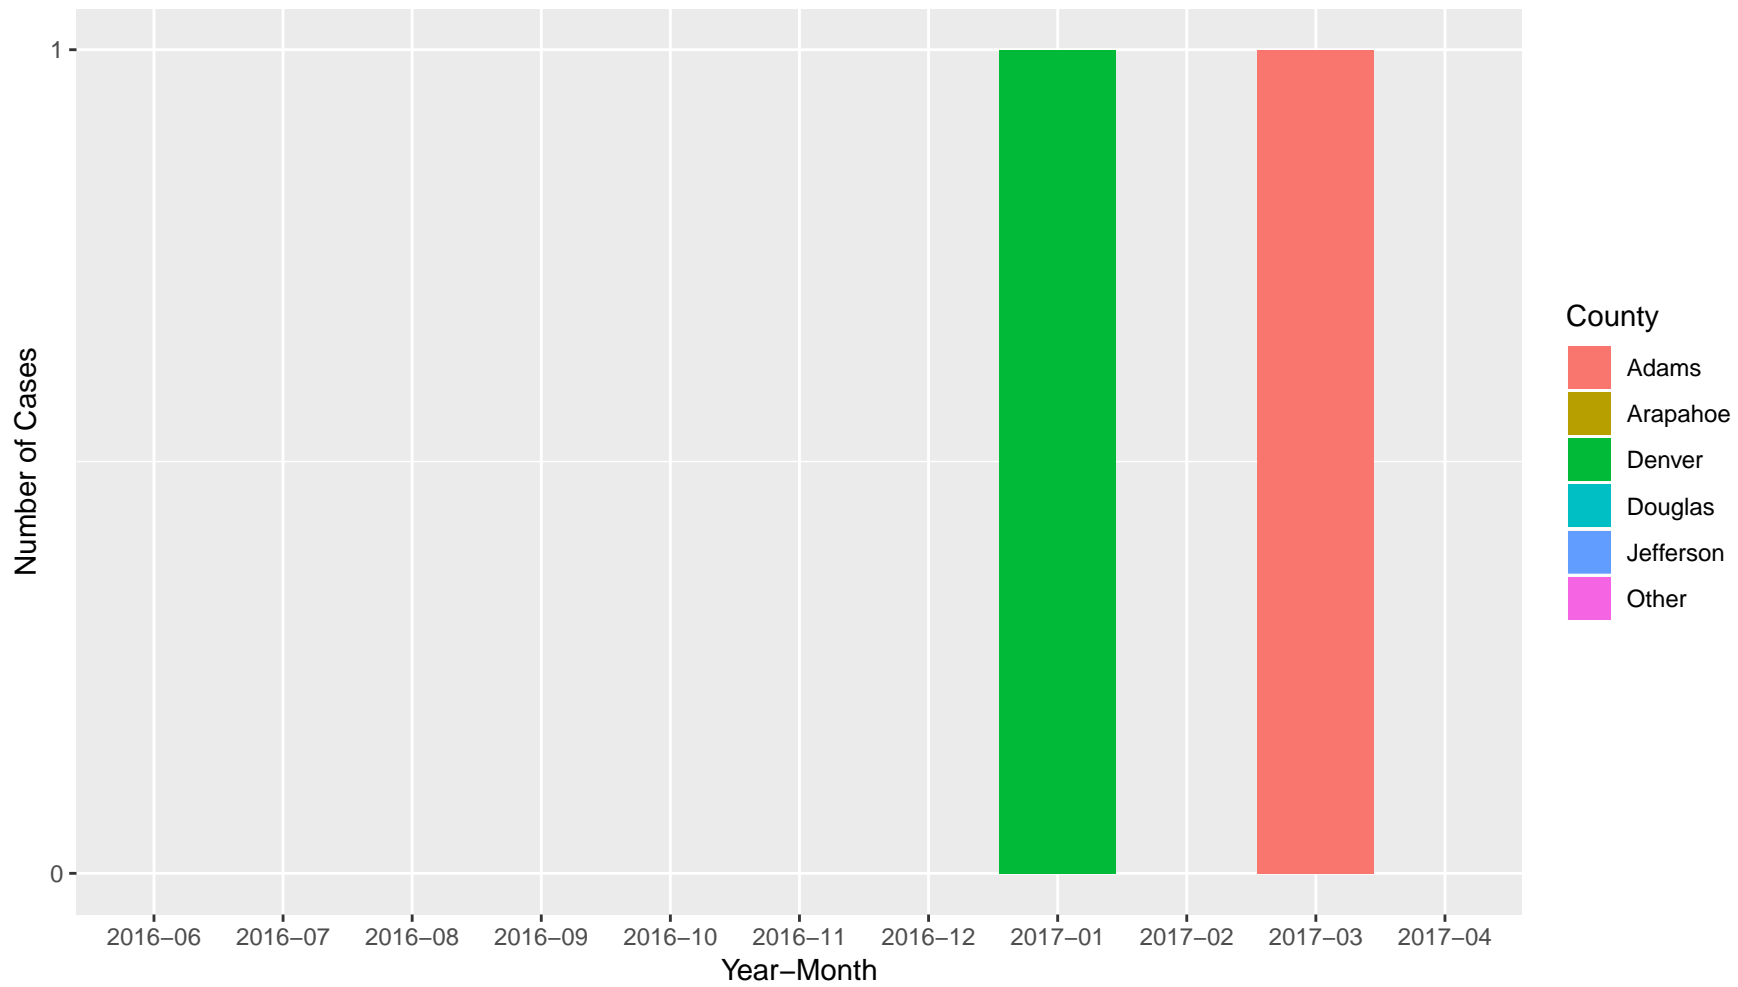

# emm2\_Cluster15

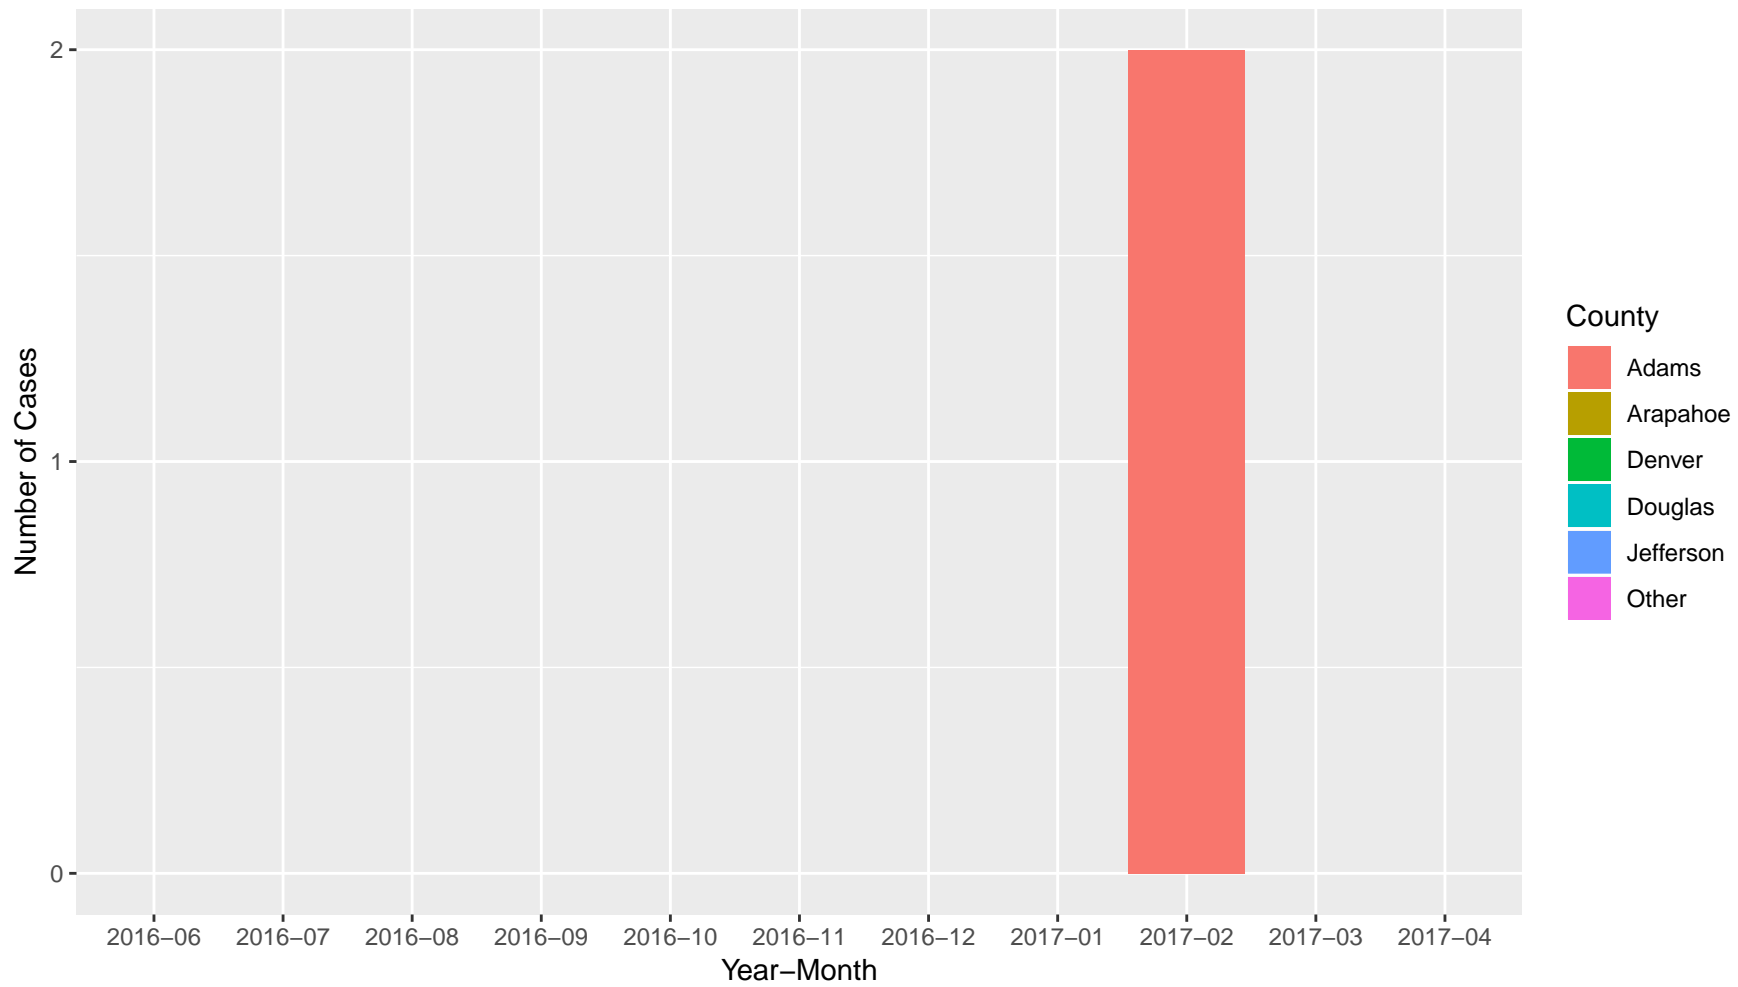

*emm22\_Cluster1*

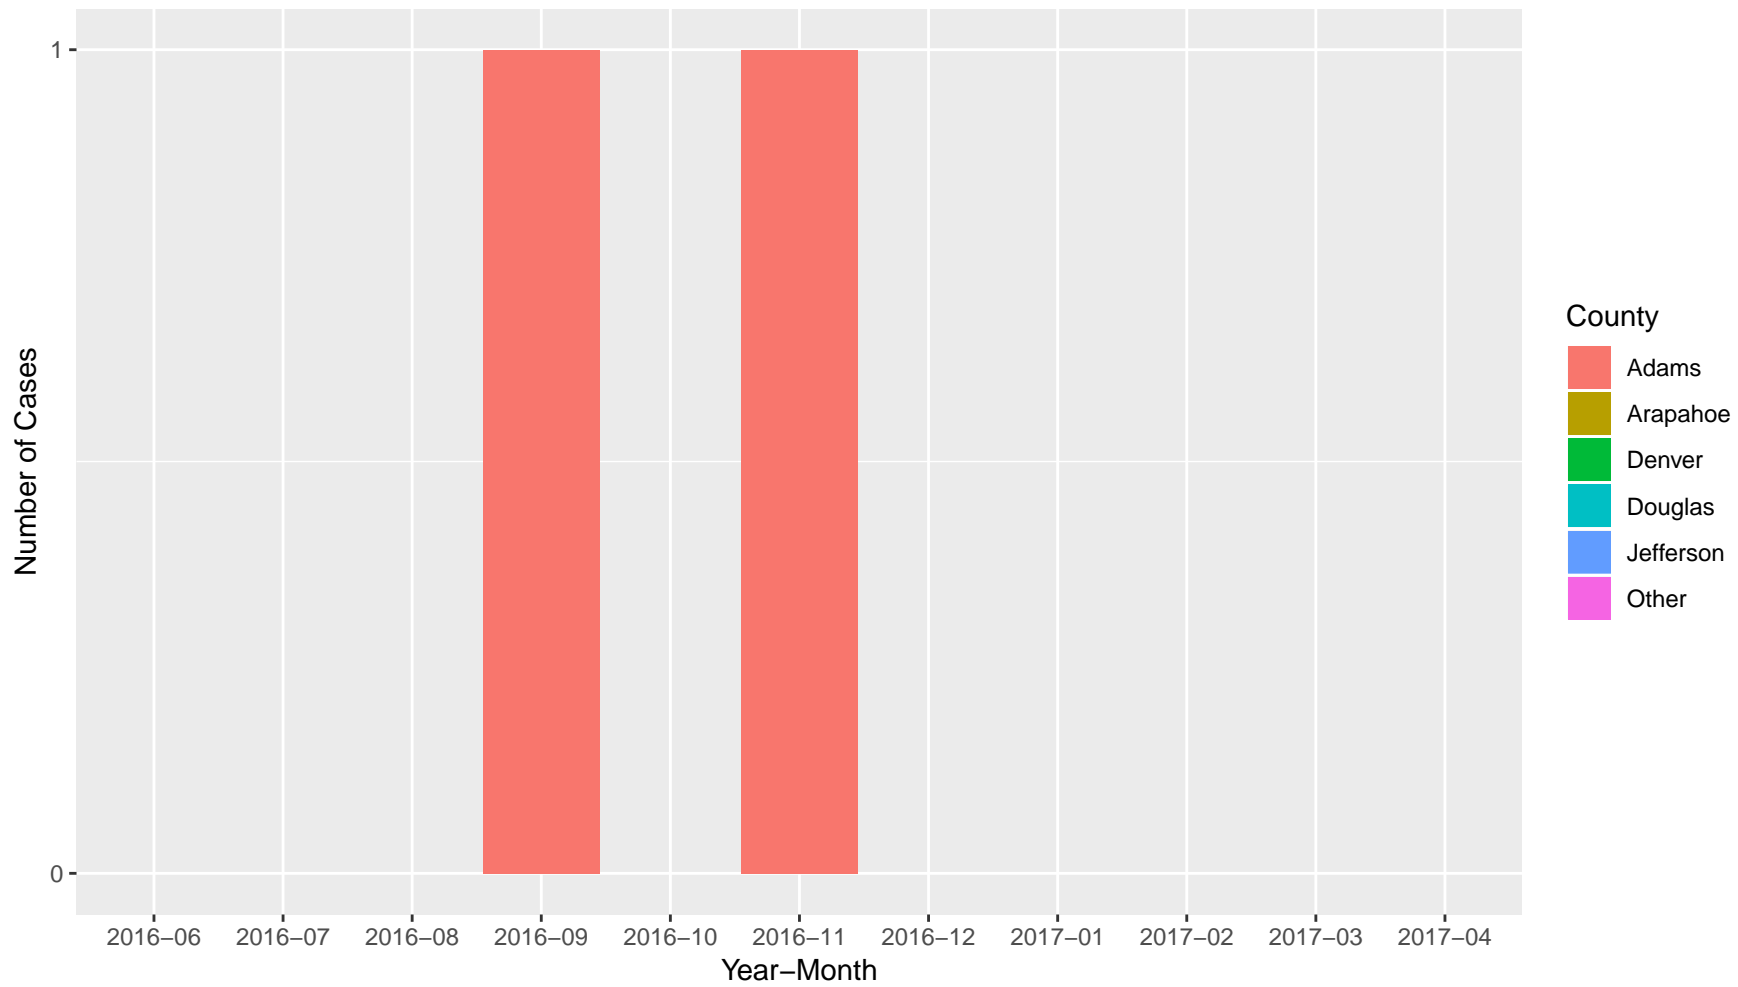

# emm28\_Cluster12

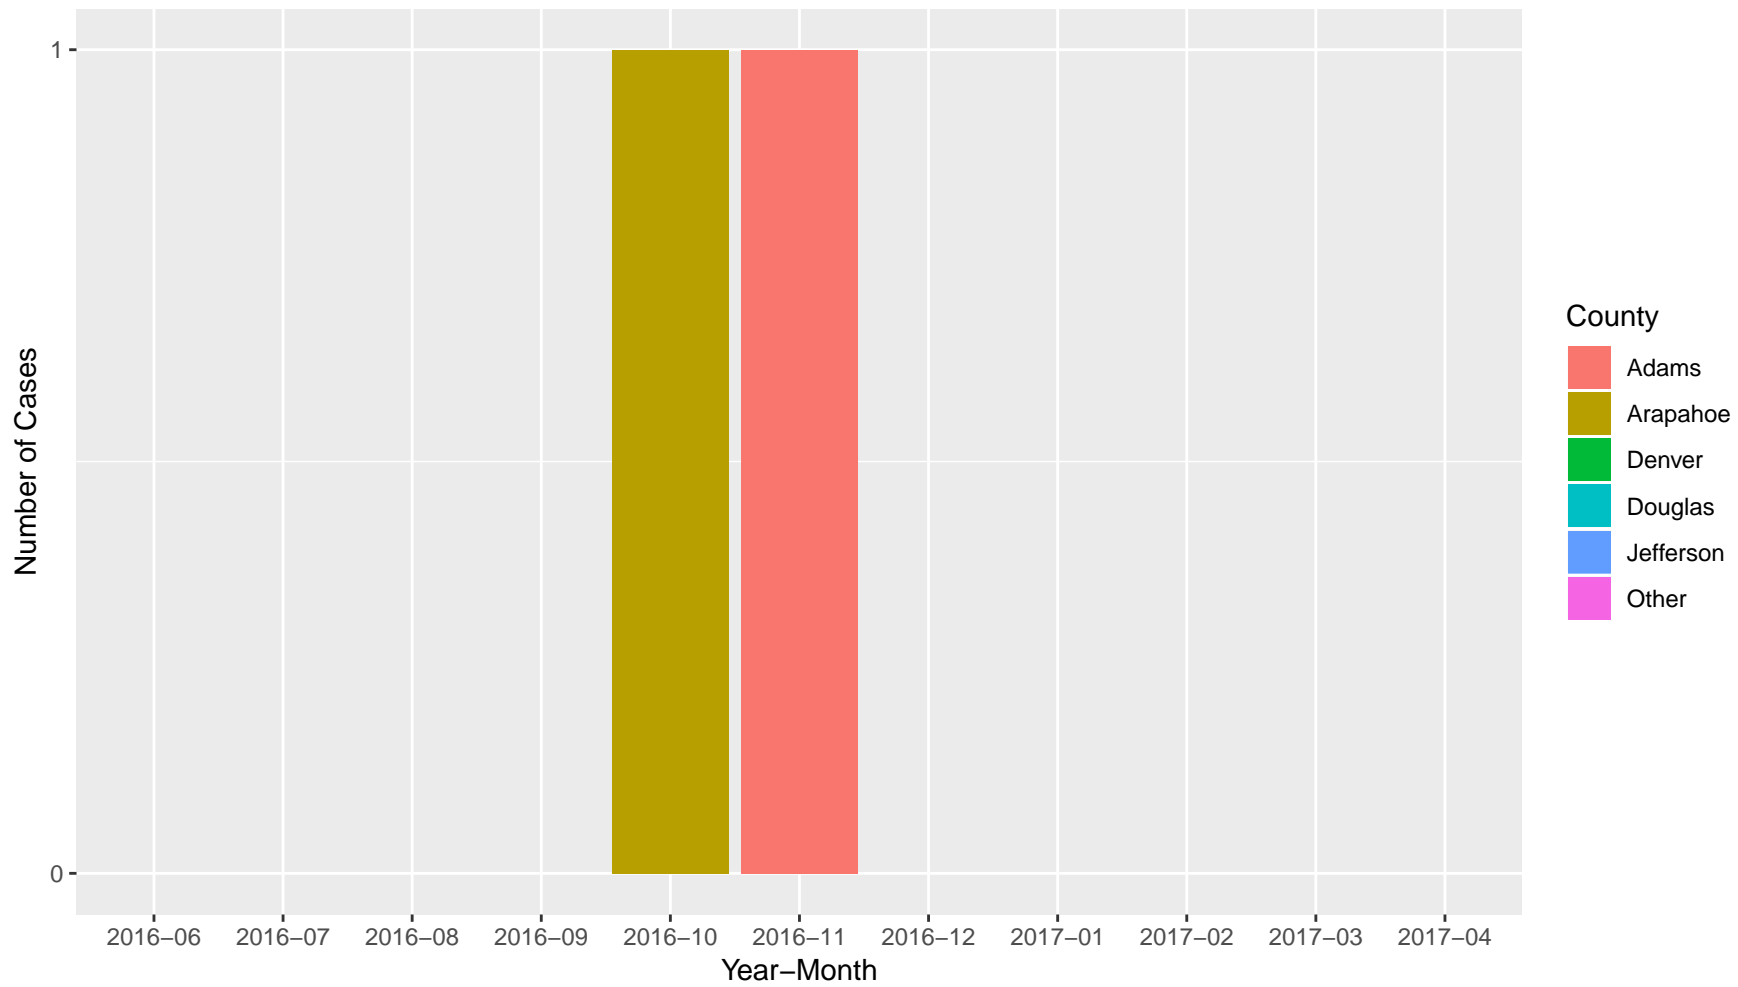

*emm28\_Cluster16*

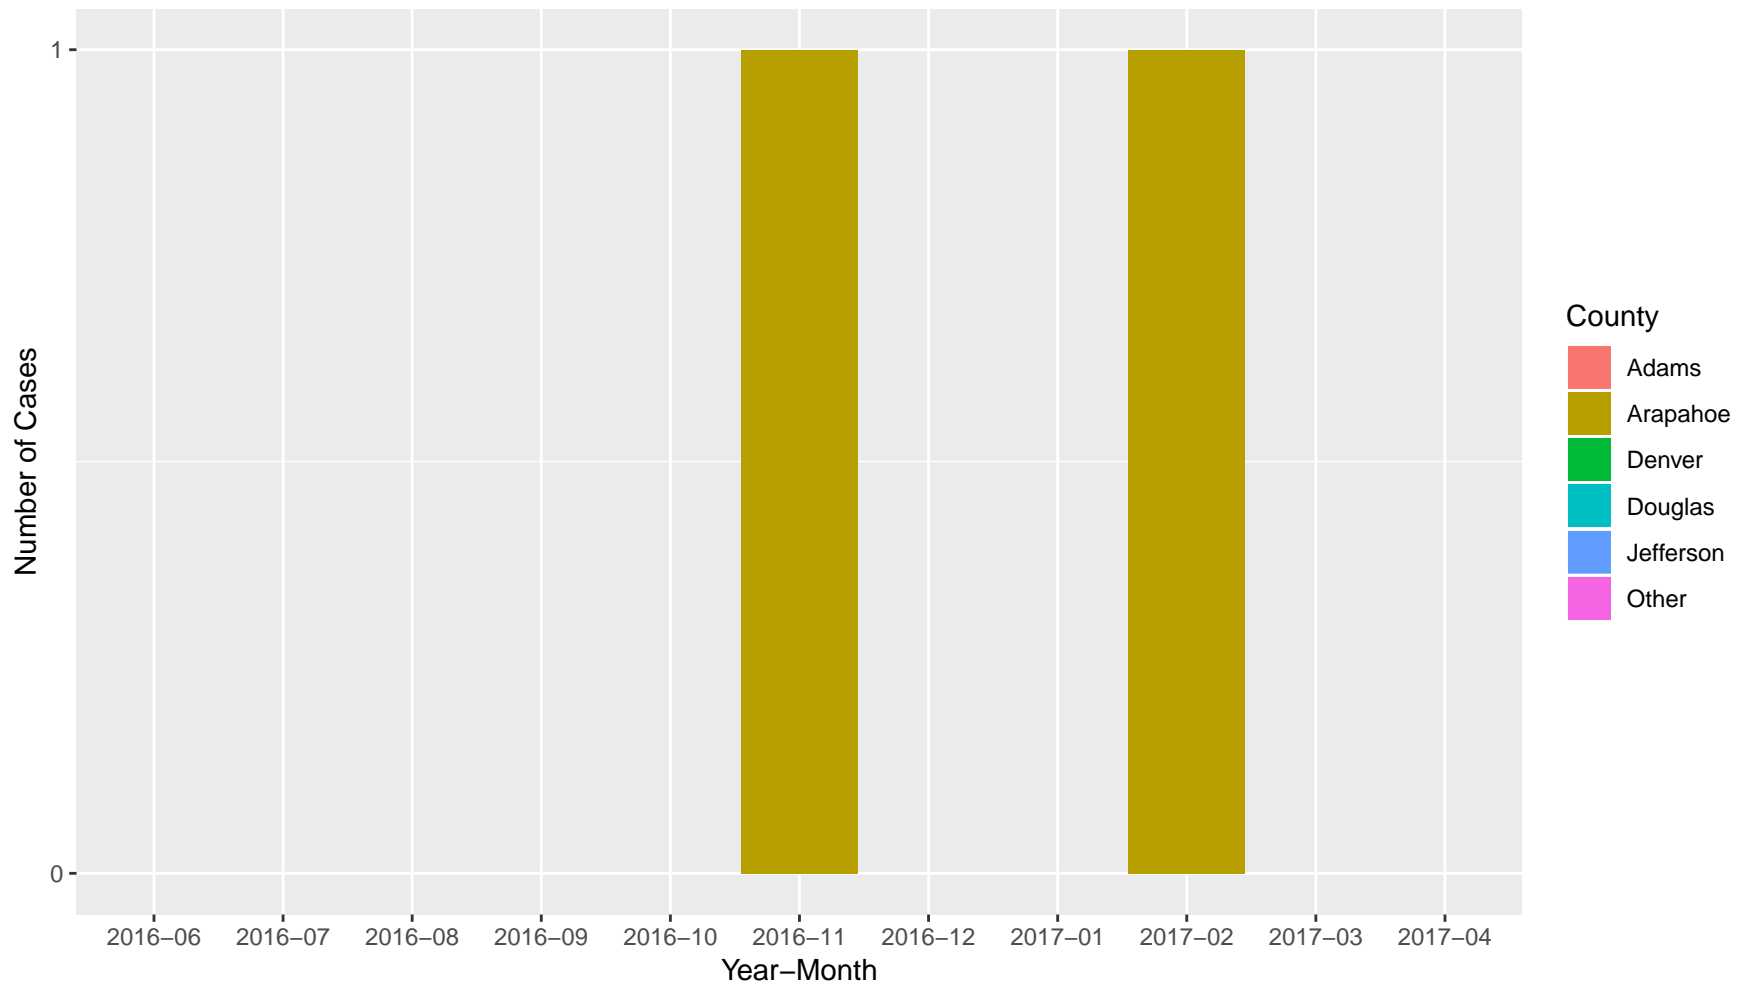

# emm28\_Cluster17

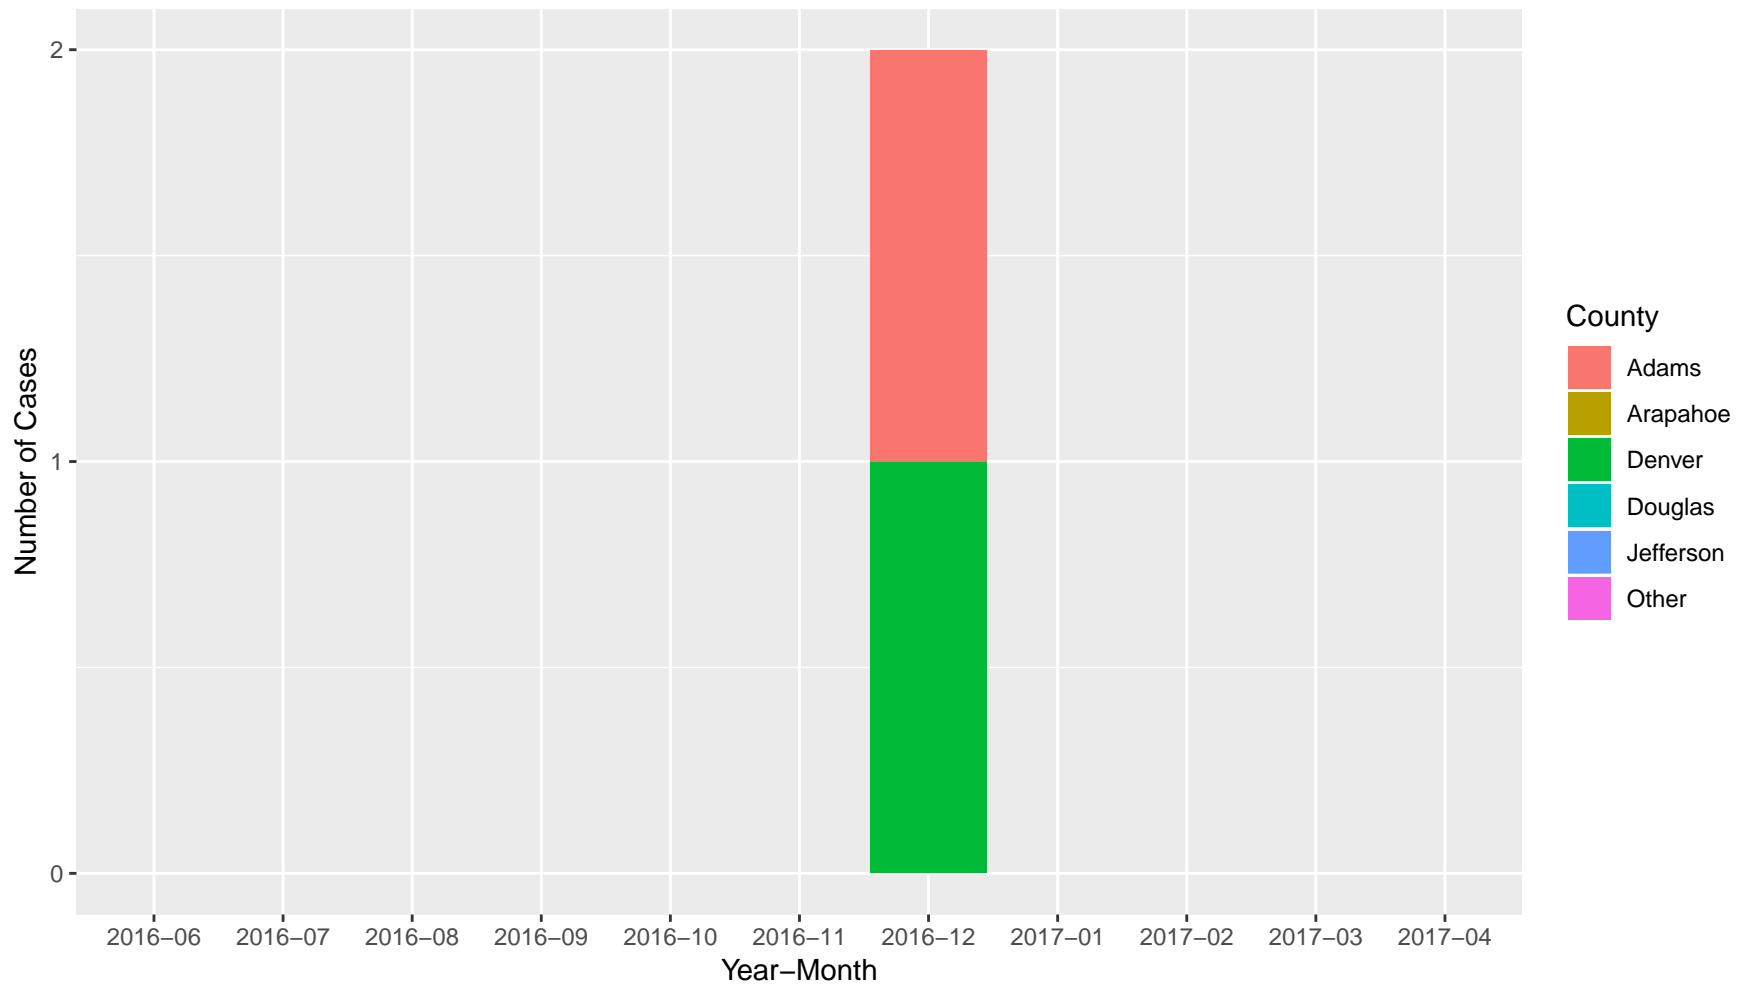



# emm28\_Cluster29

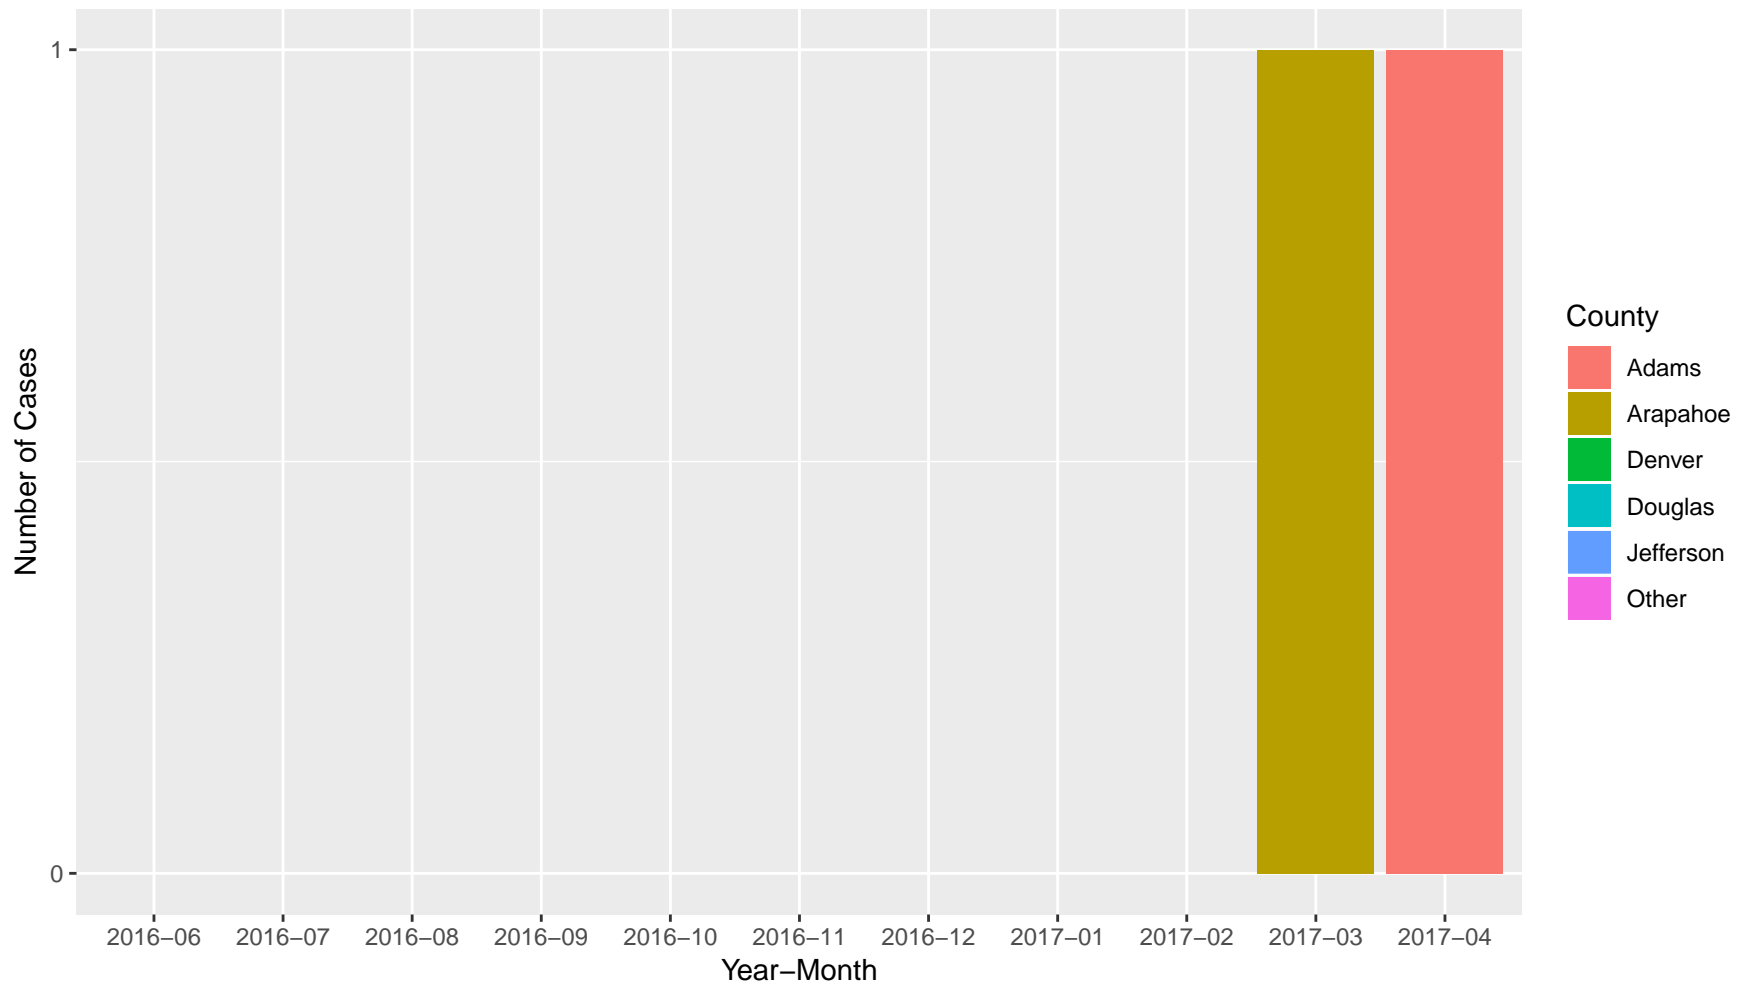

*emm28\_Cluster32*

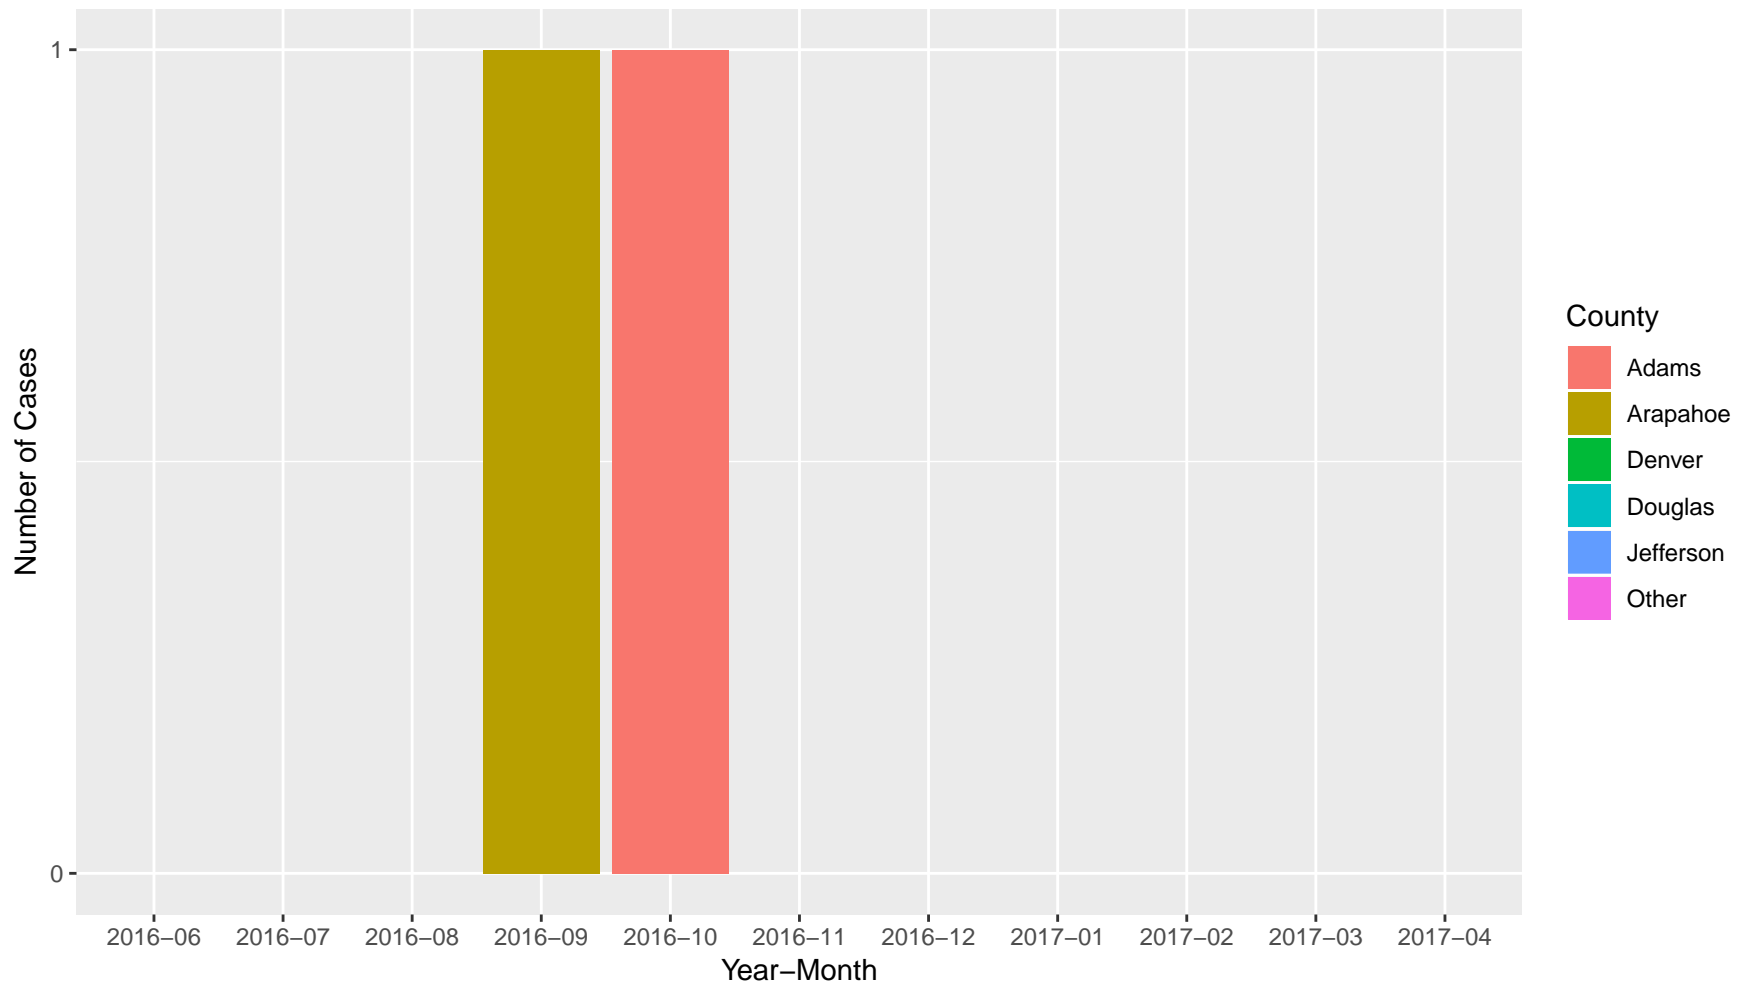

*emm28\_Cluster4*

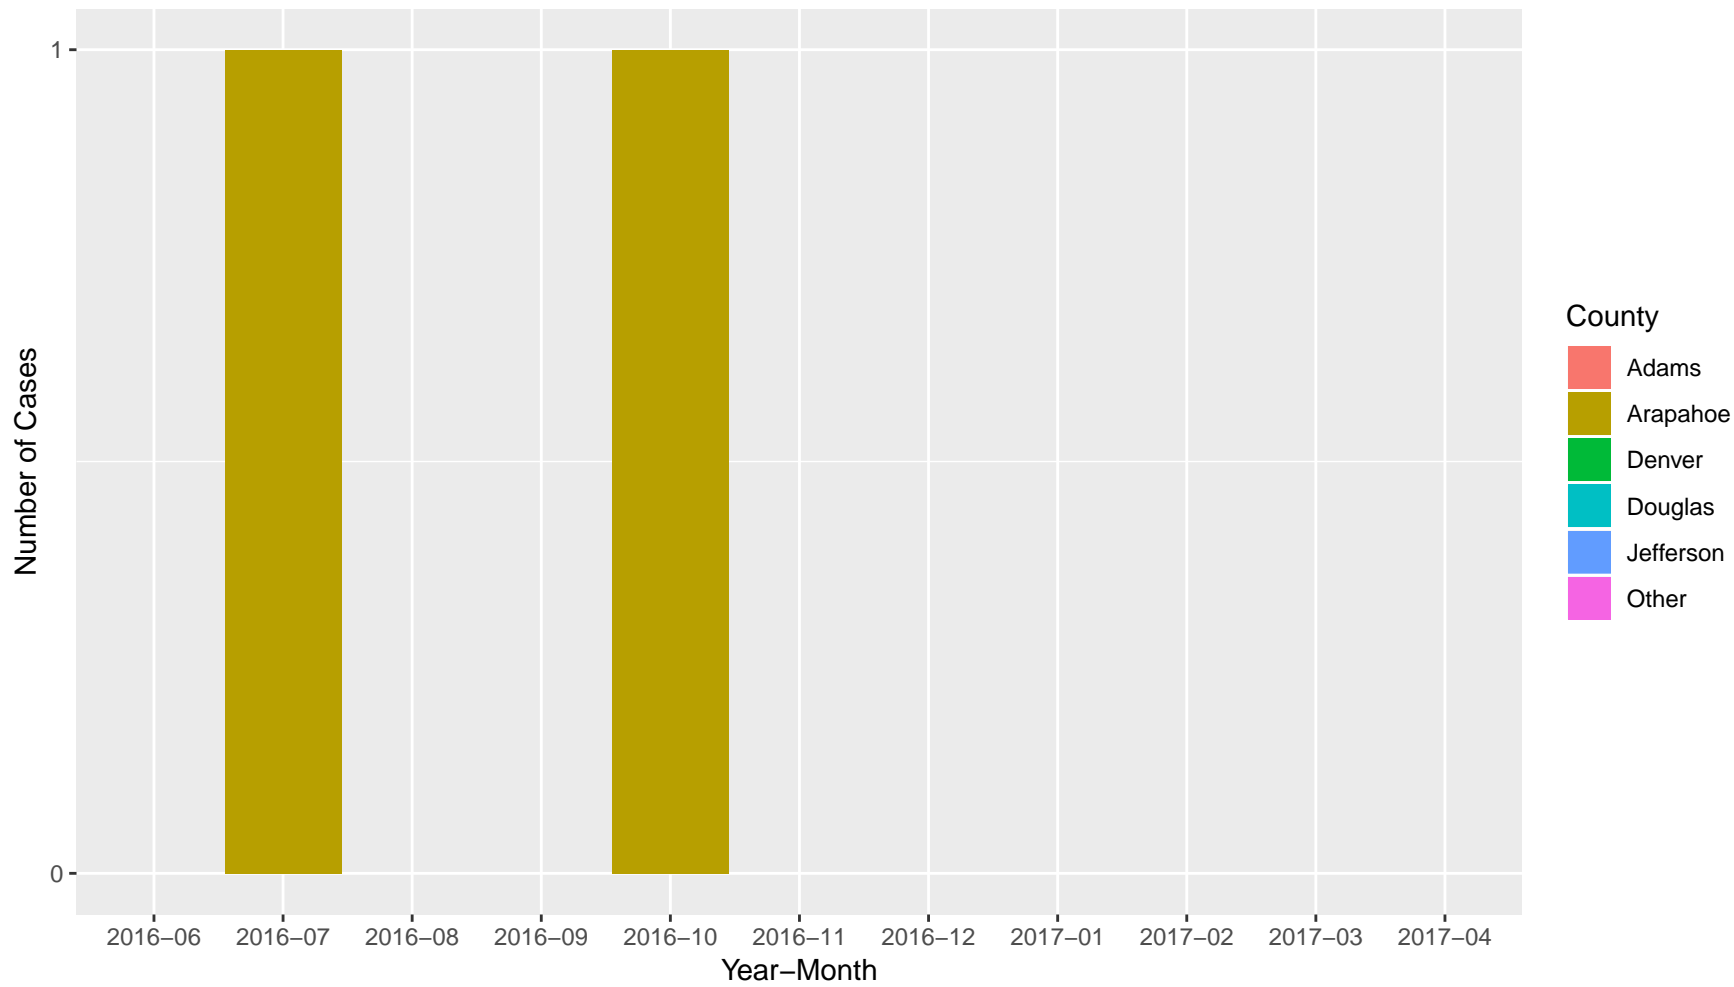

# emm3\_Cluster4

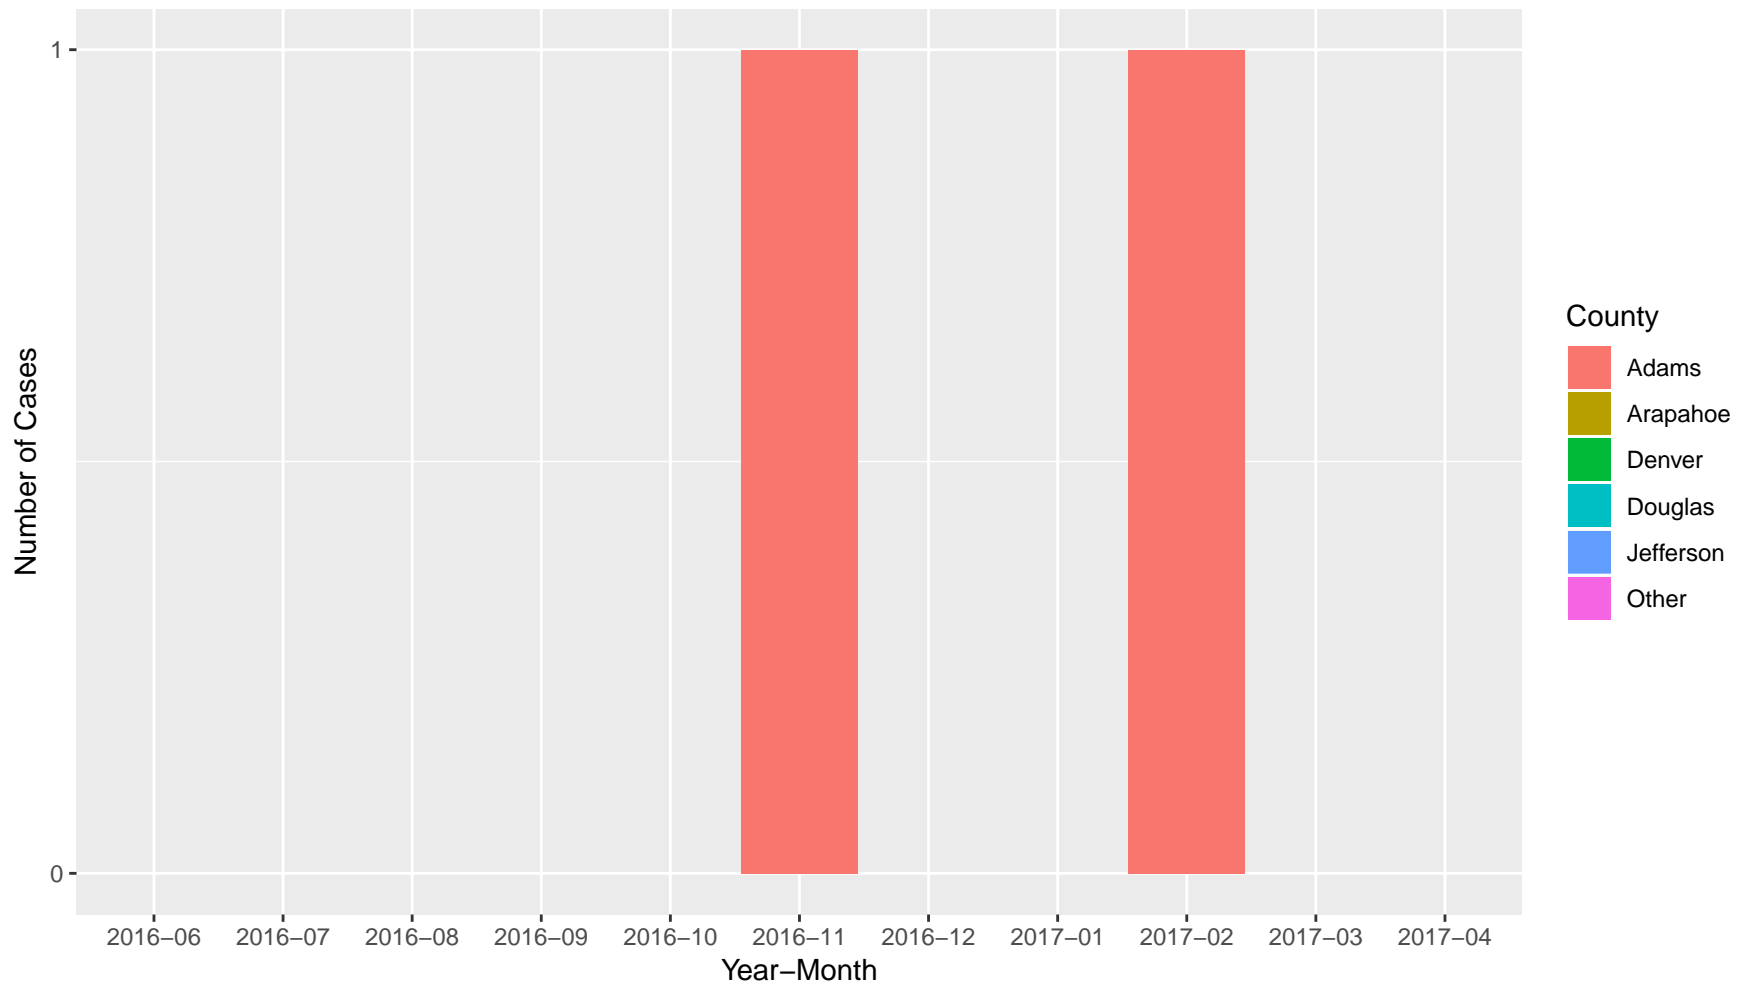

*emm3\_Cluster5*

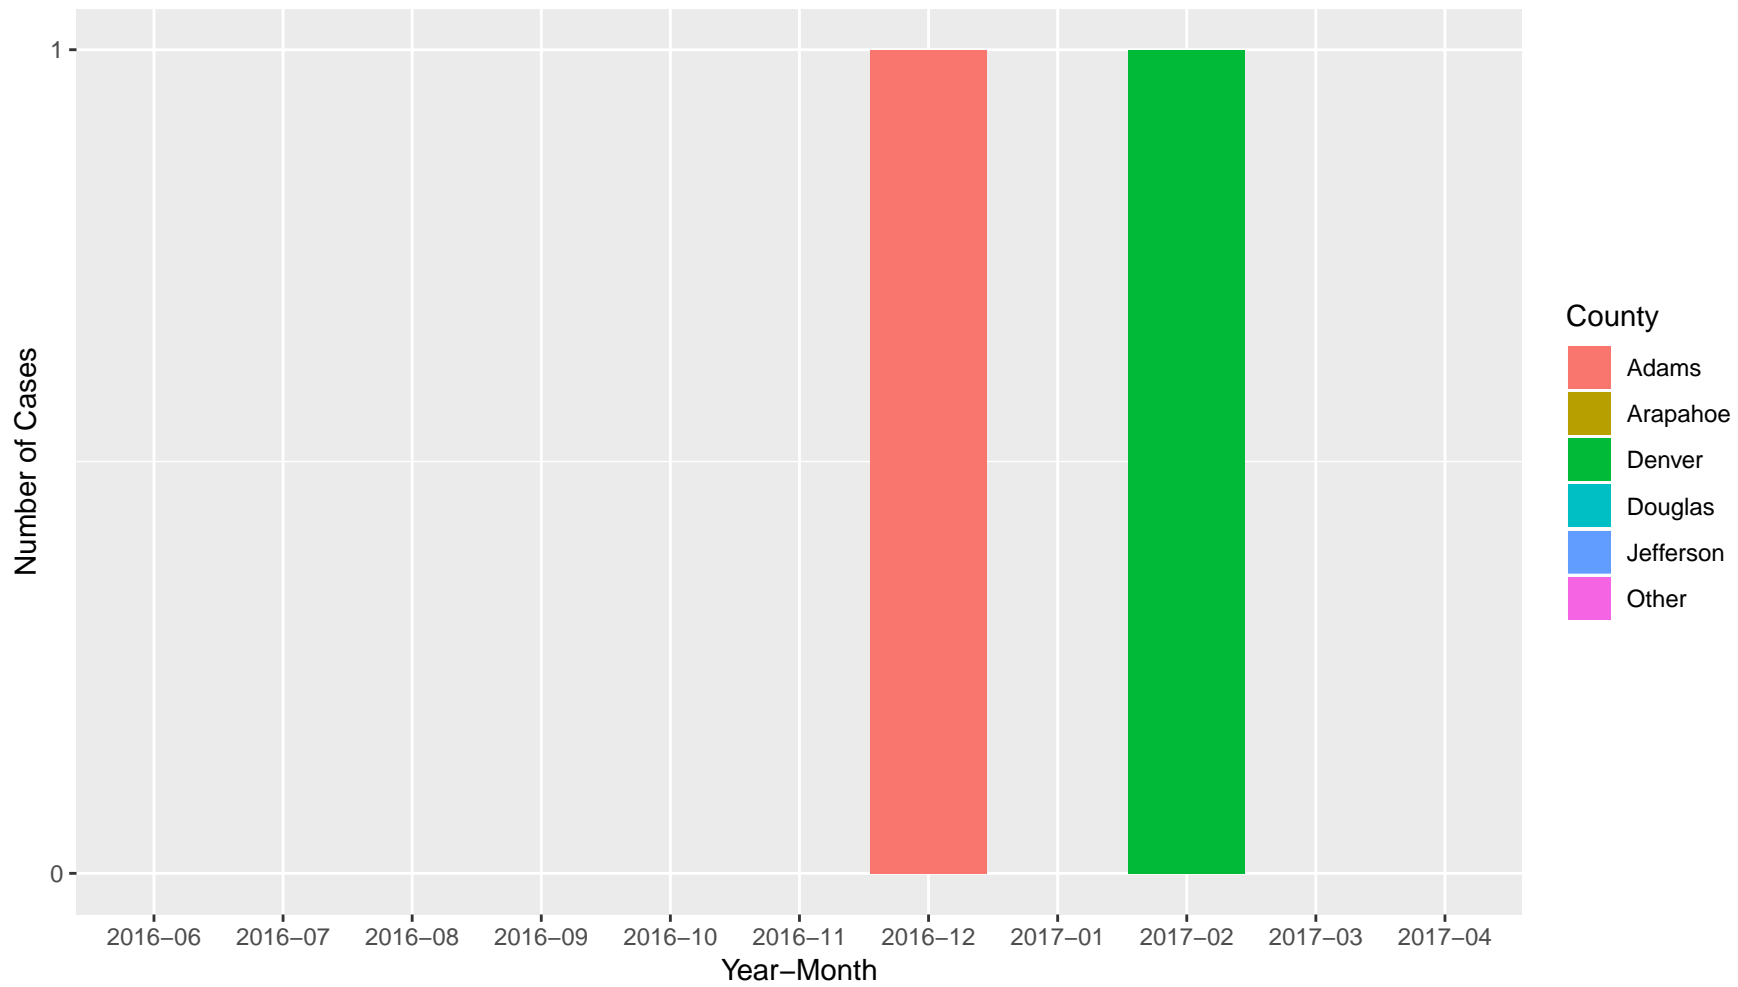

# emm3\_Cluster8



# emm4\_Cluster22

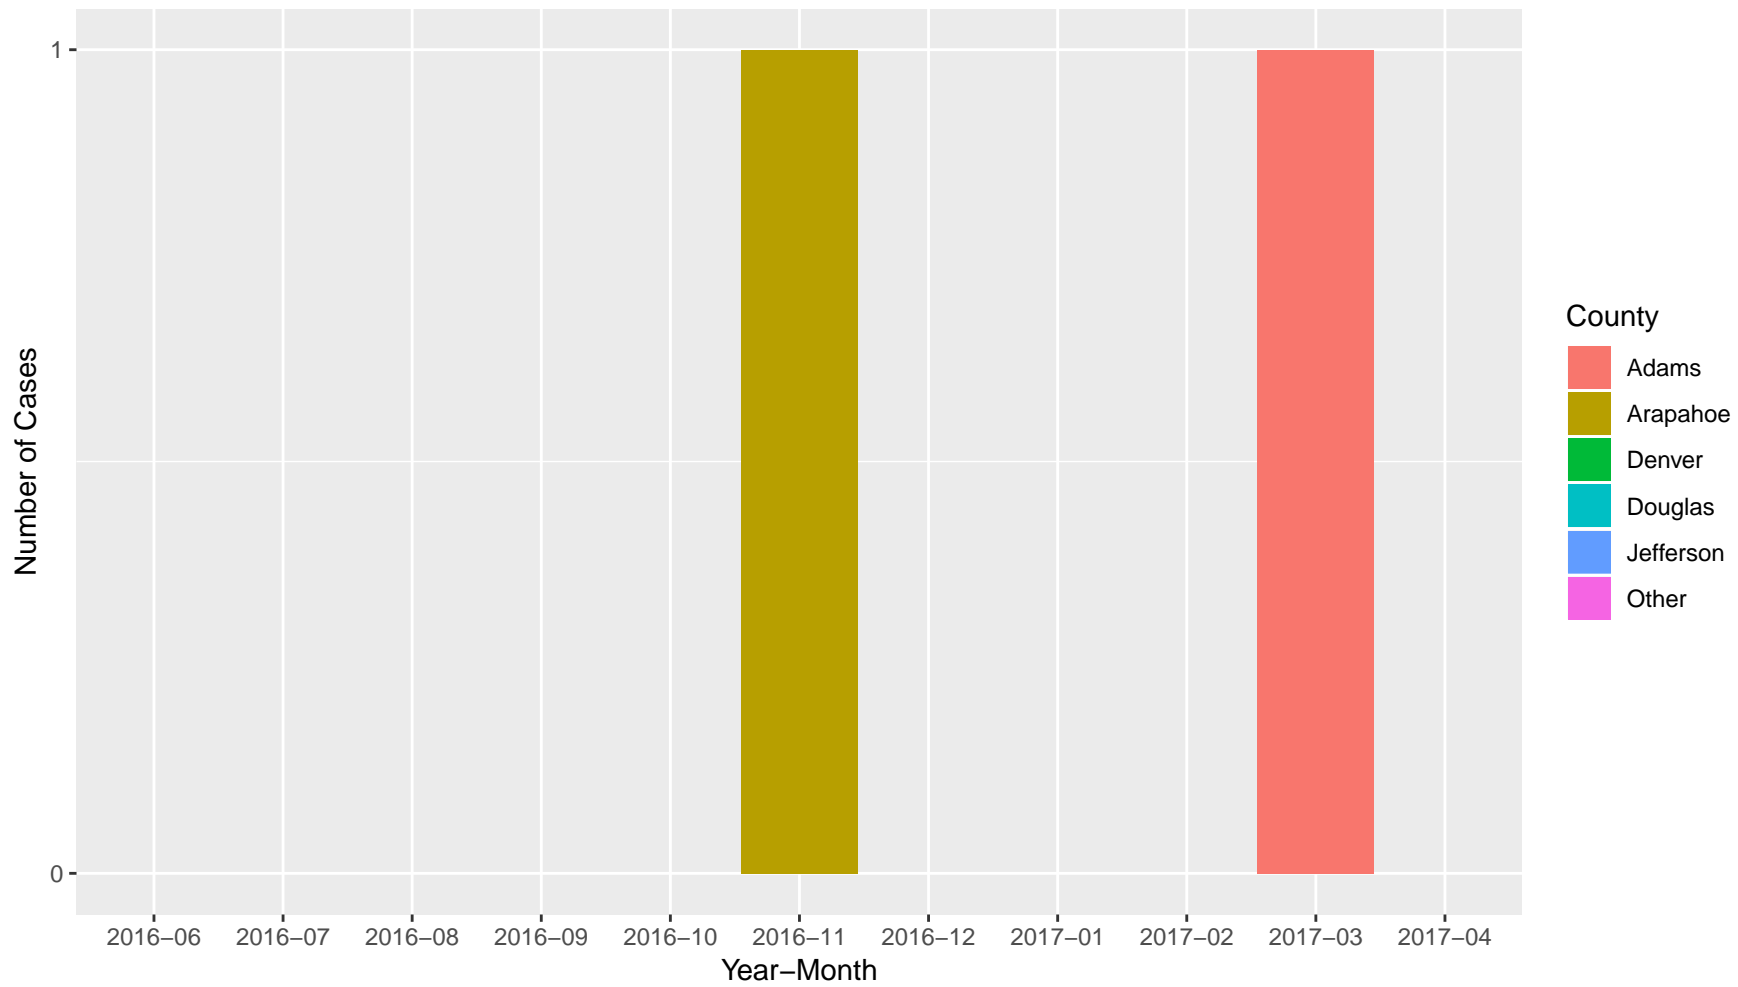

# emm4\_Cluster24

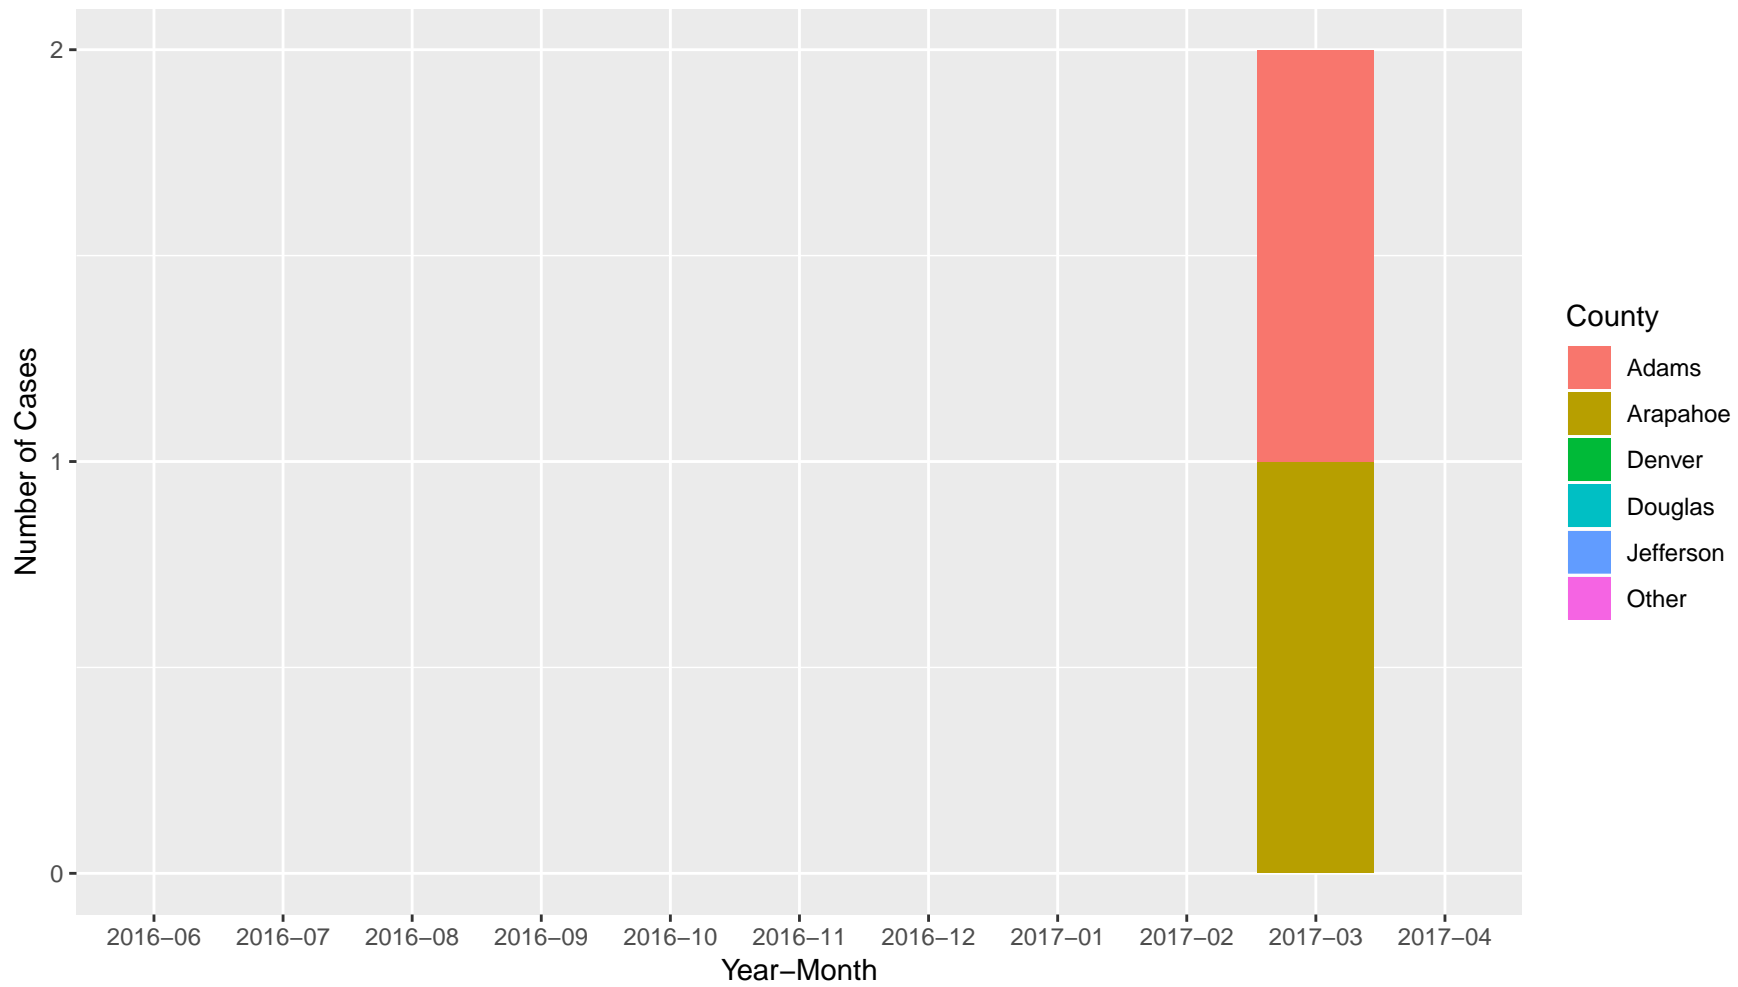



# emm60\_Cluster1

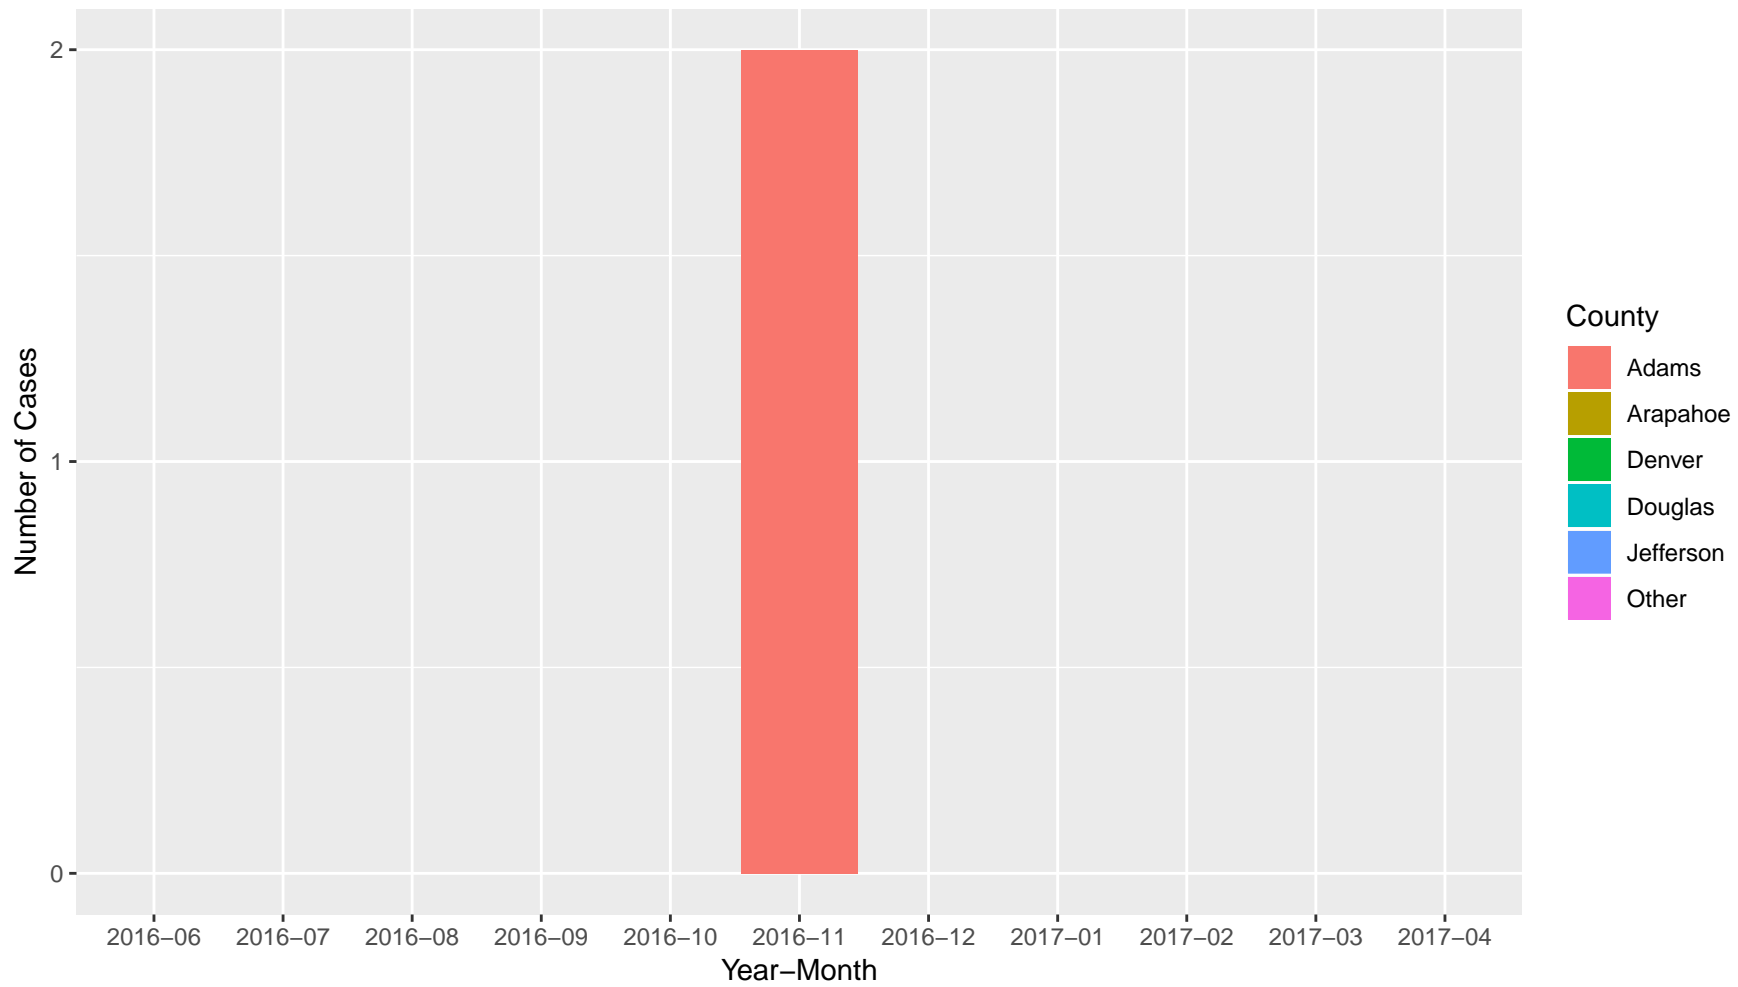

# emm75\_Cluster5

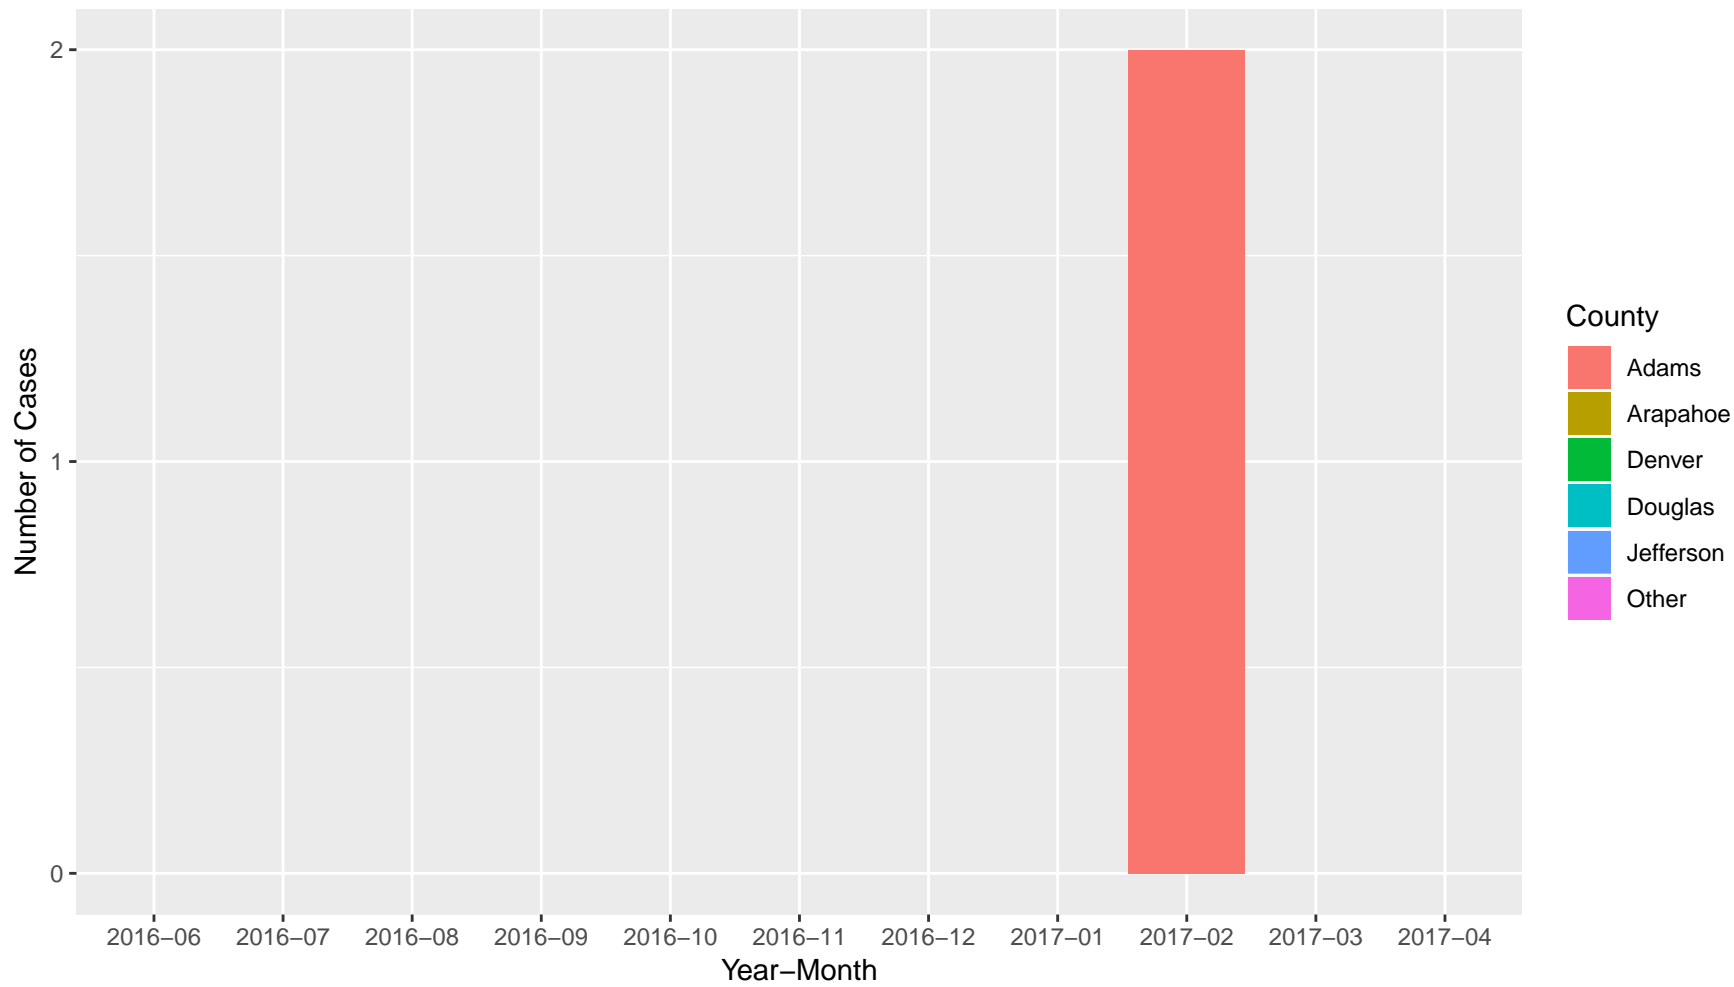

# emm76\_Cluster2

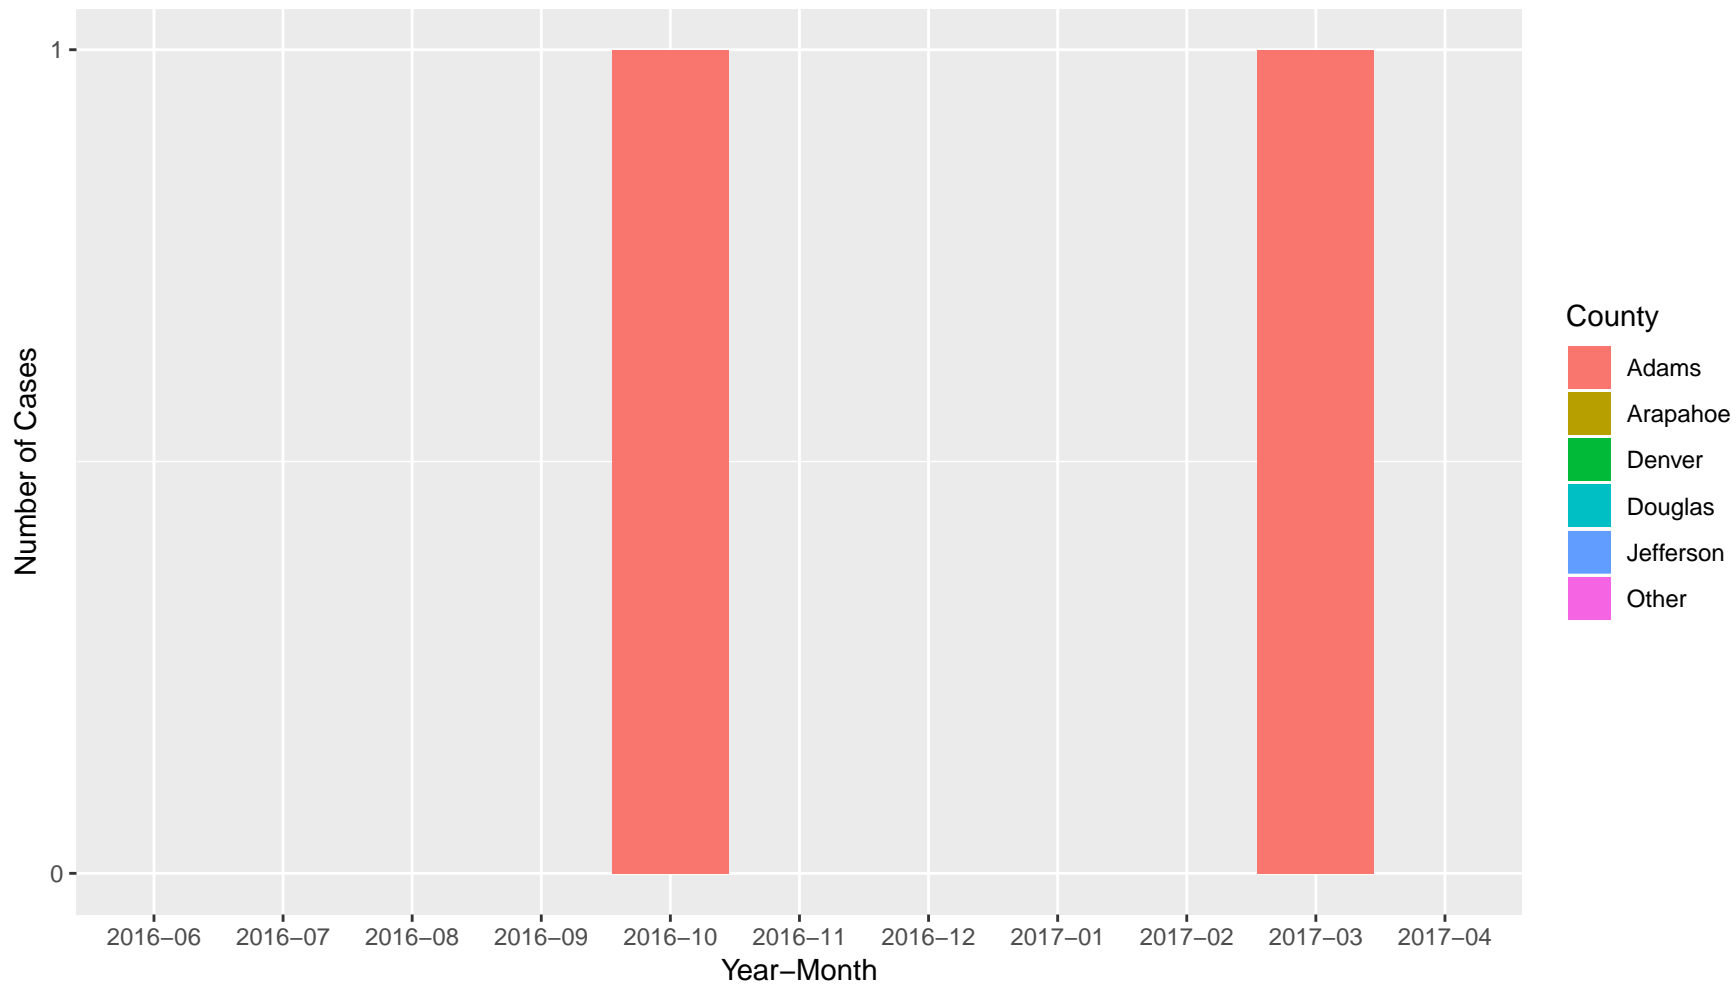

*emm77\_Cluster10*

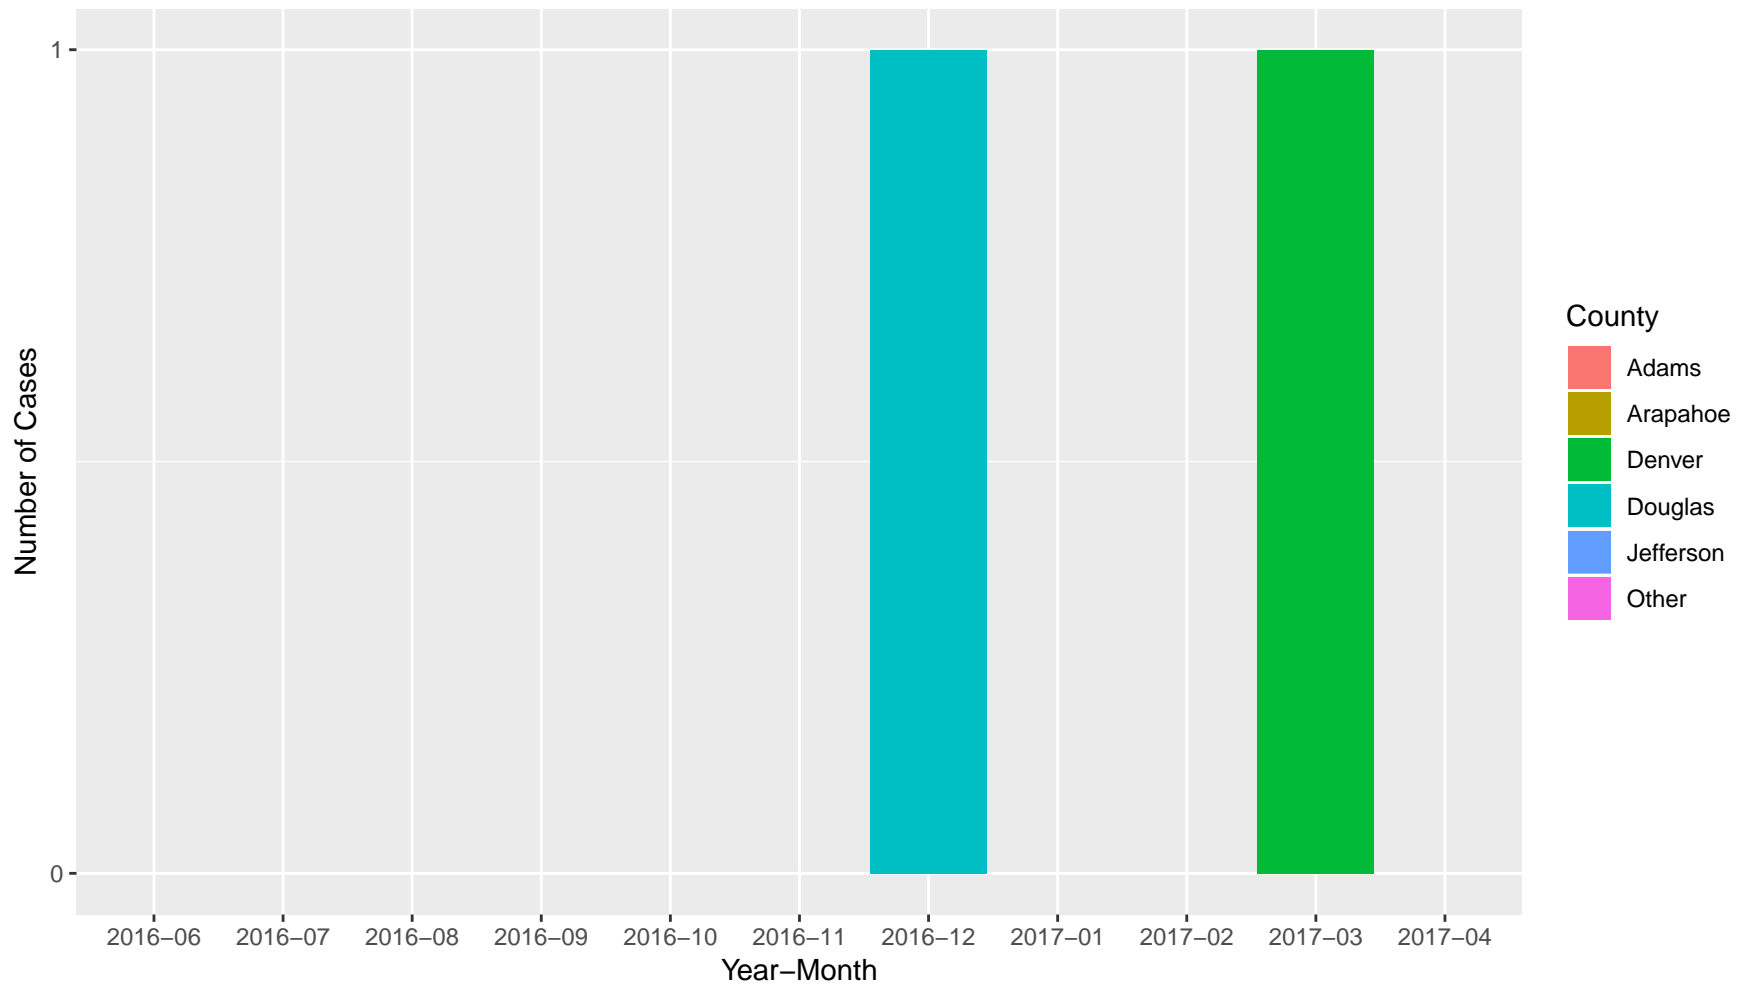

*emm77\_Cluster2*

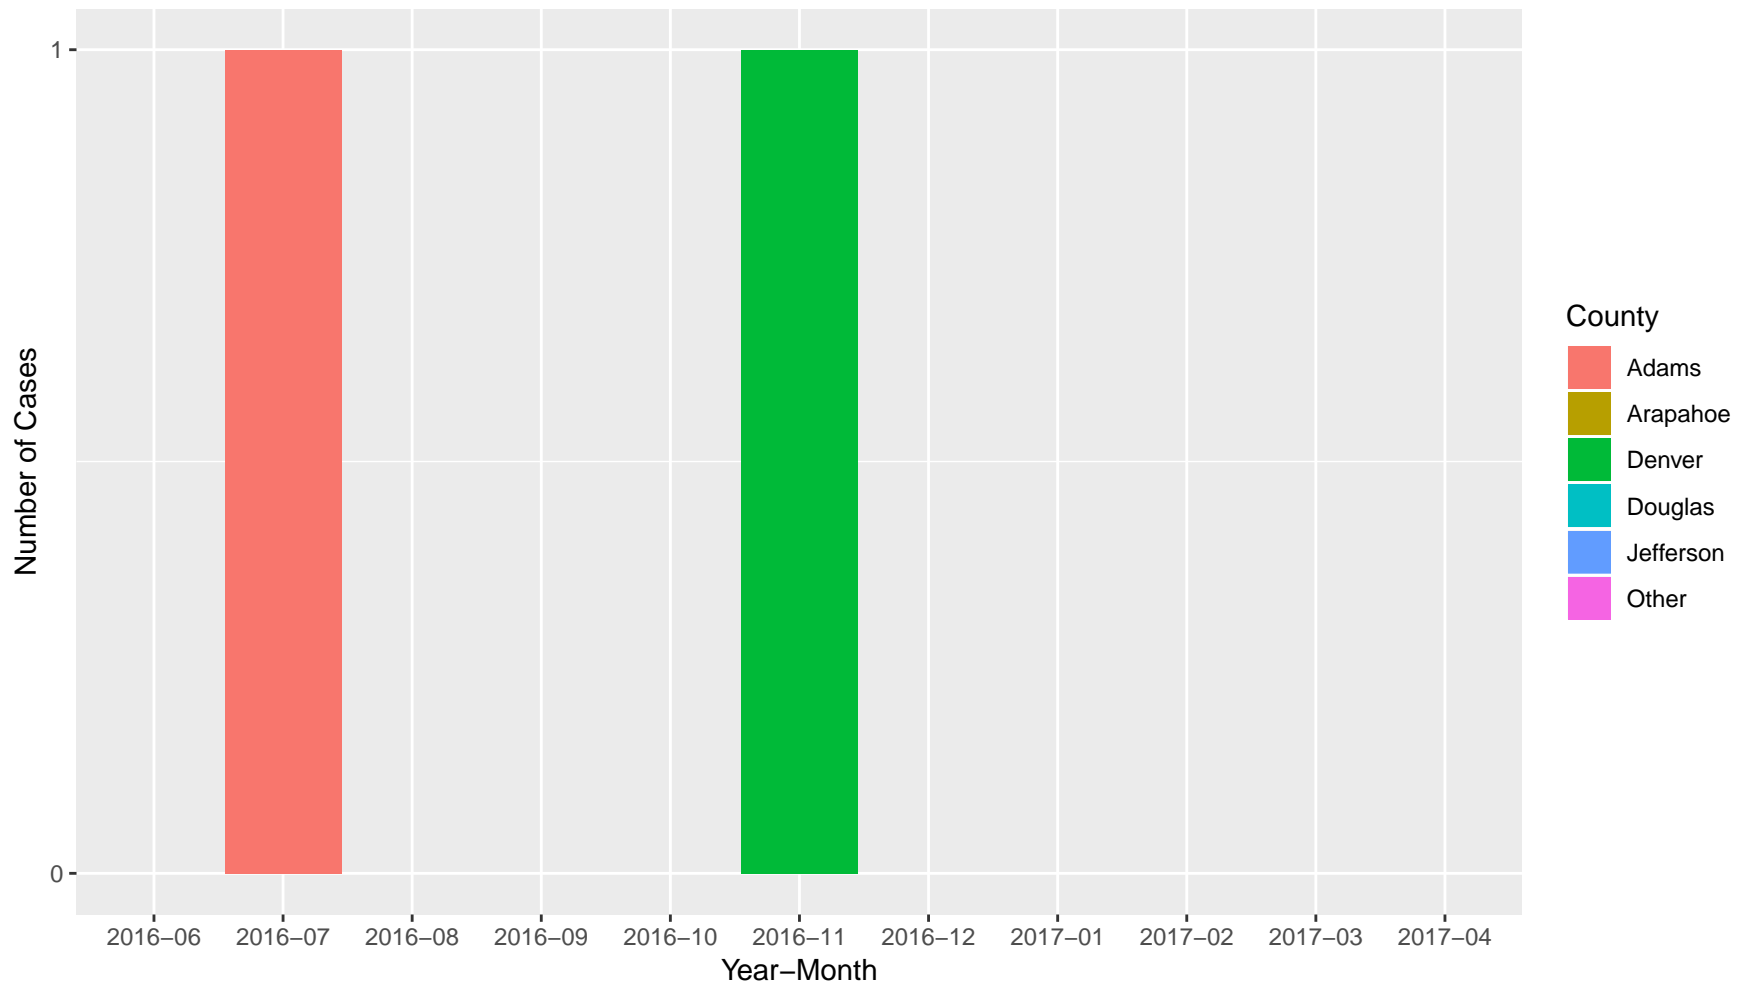

*emm77\_Cluster3*

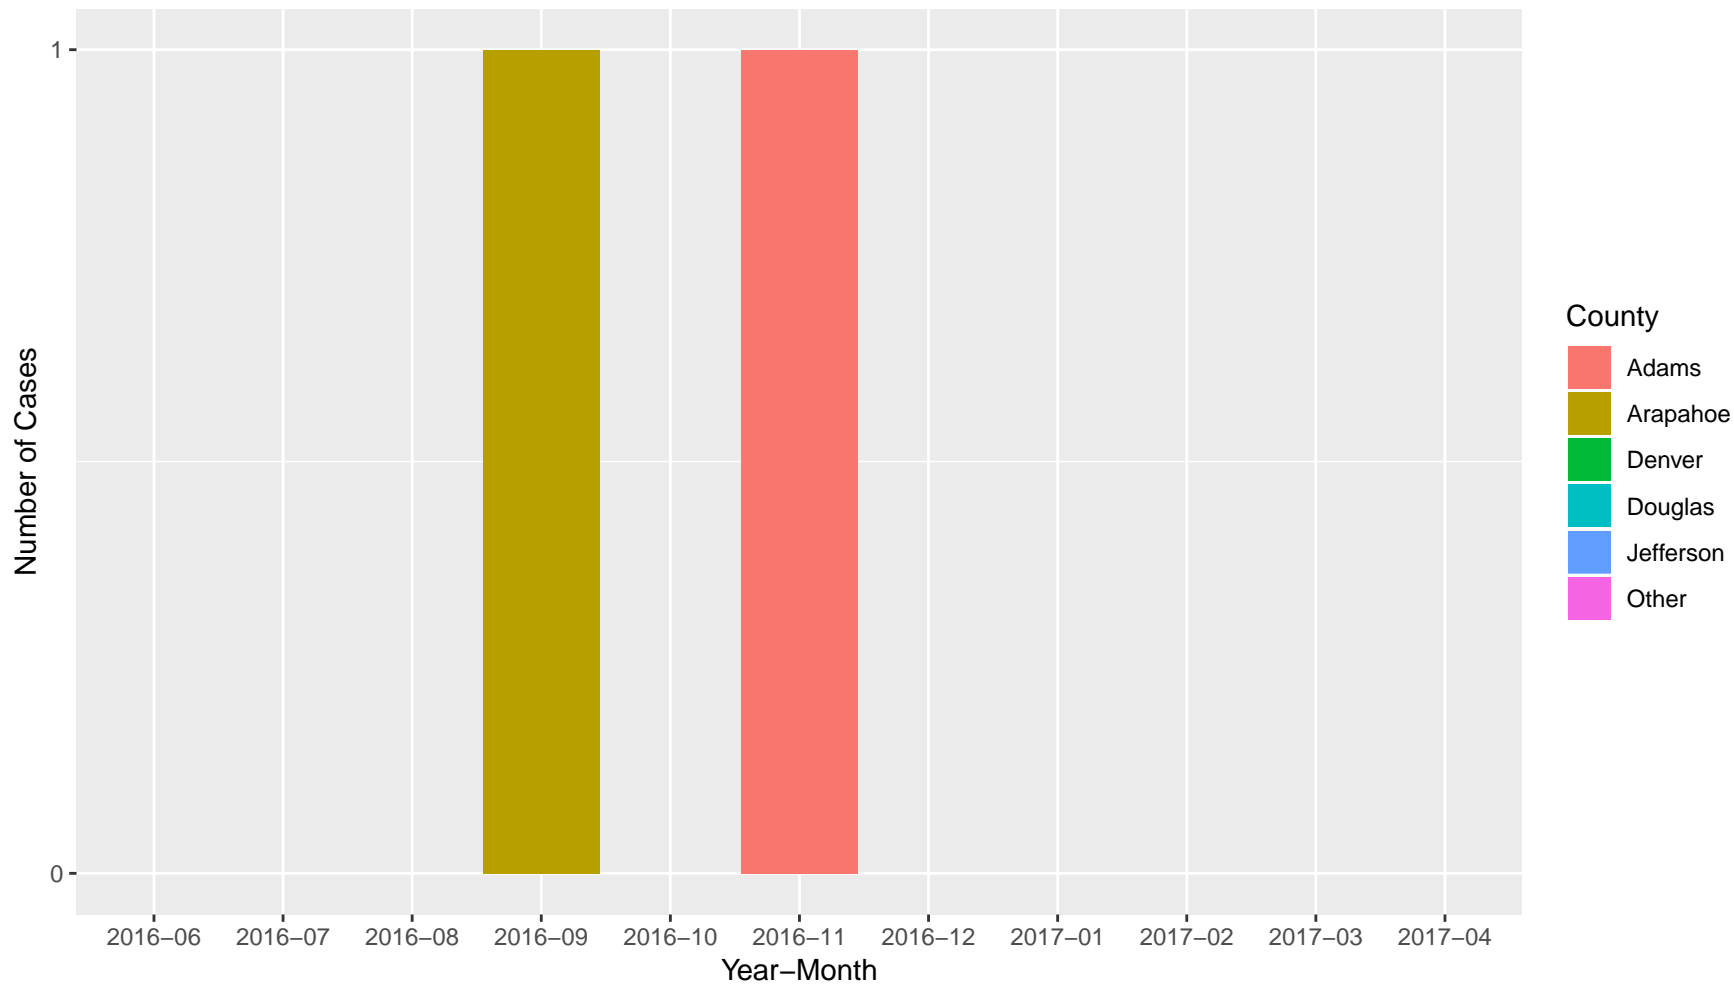

*emm81\_Cluster3*

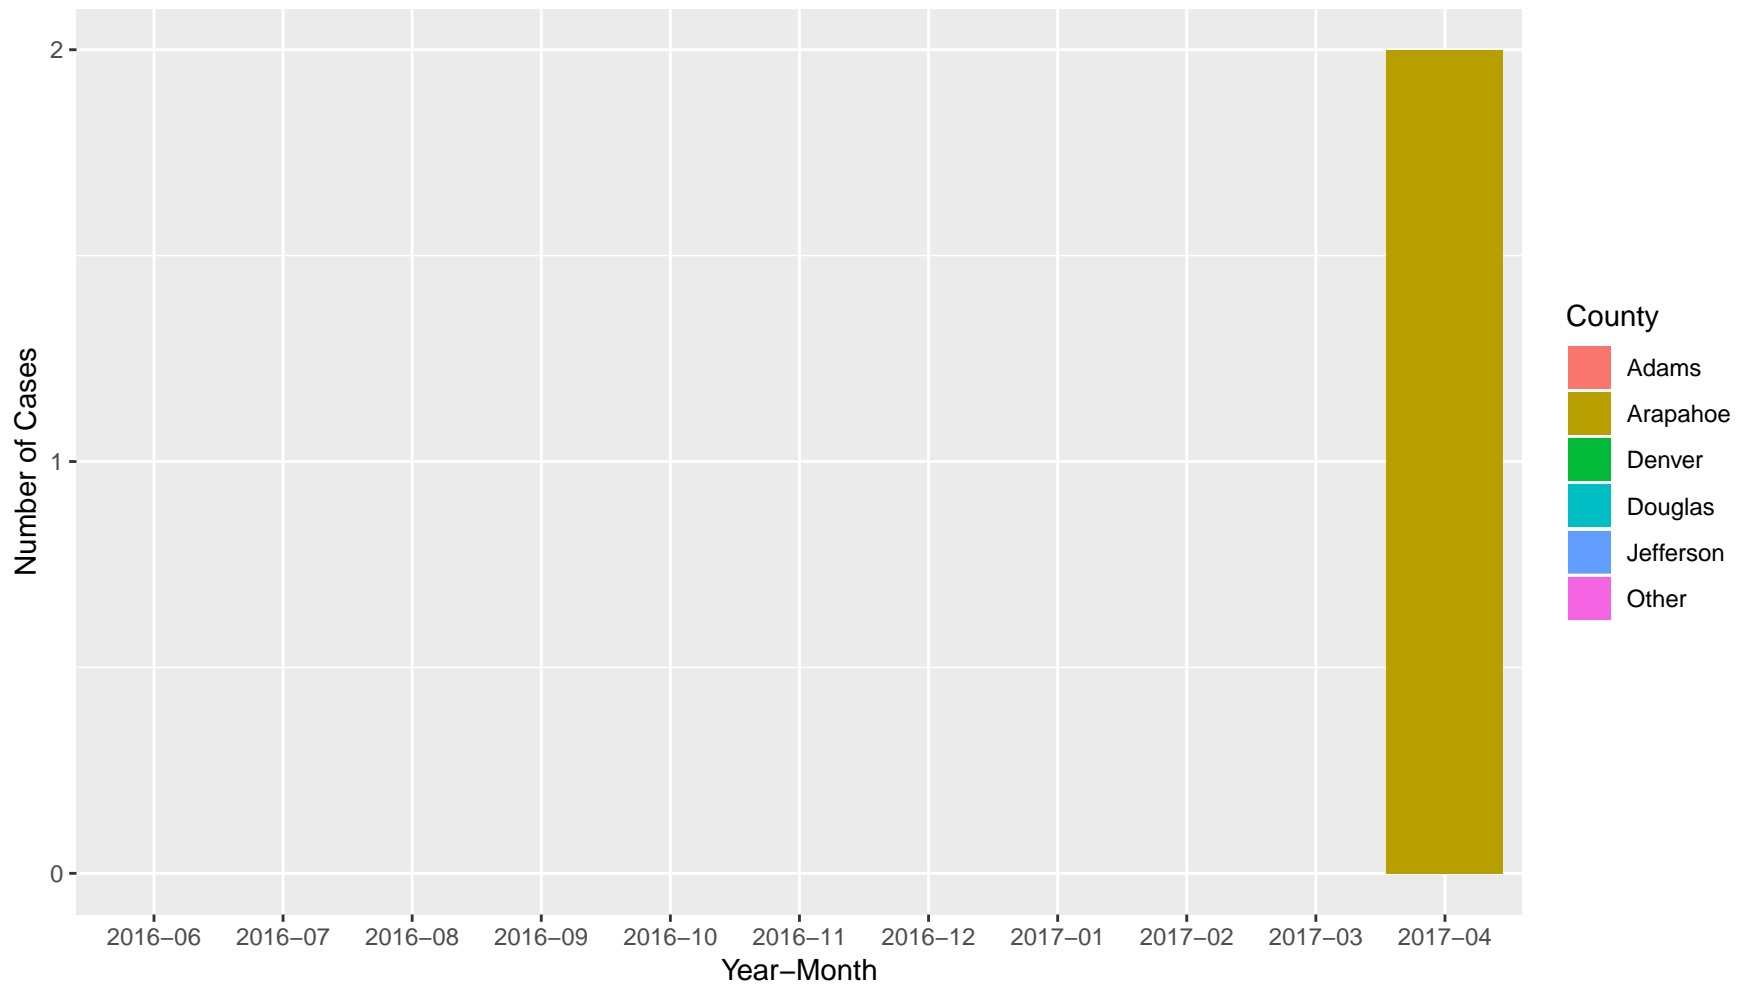

# emm82\_Cluster1

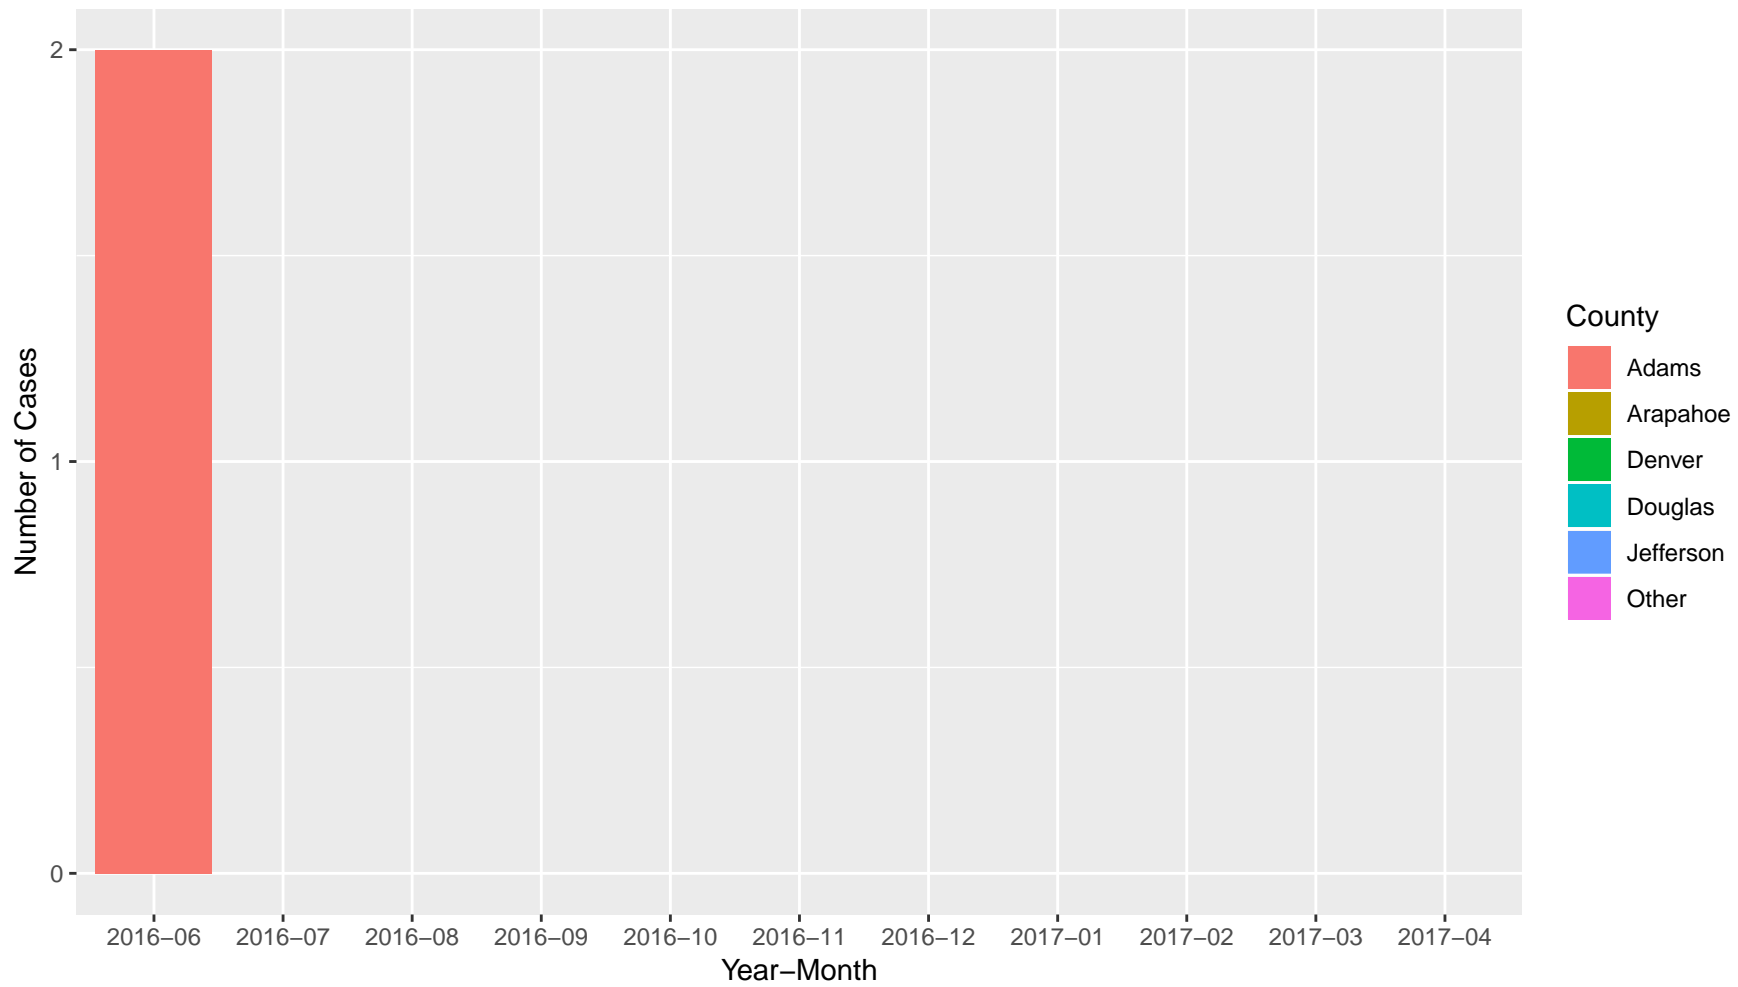



*emm82\_Cluster4*

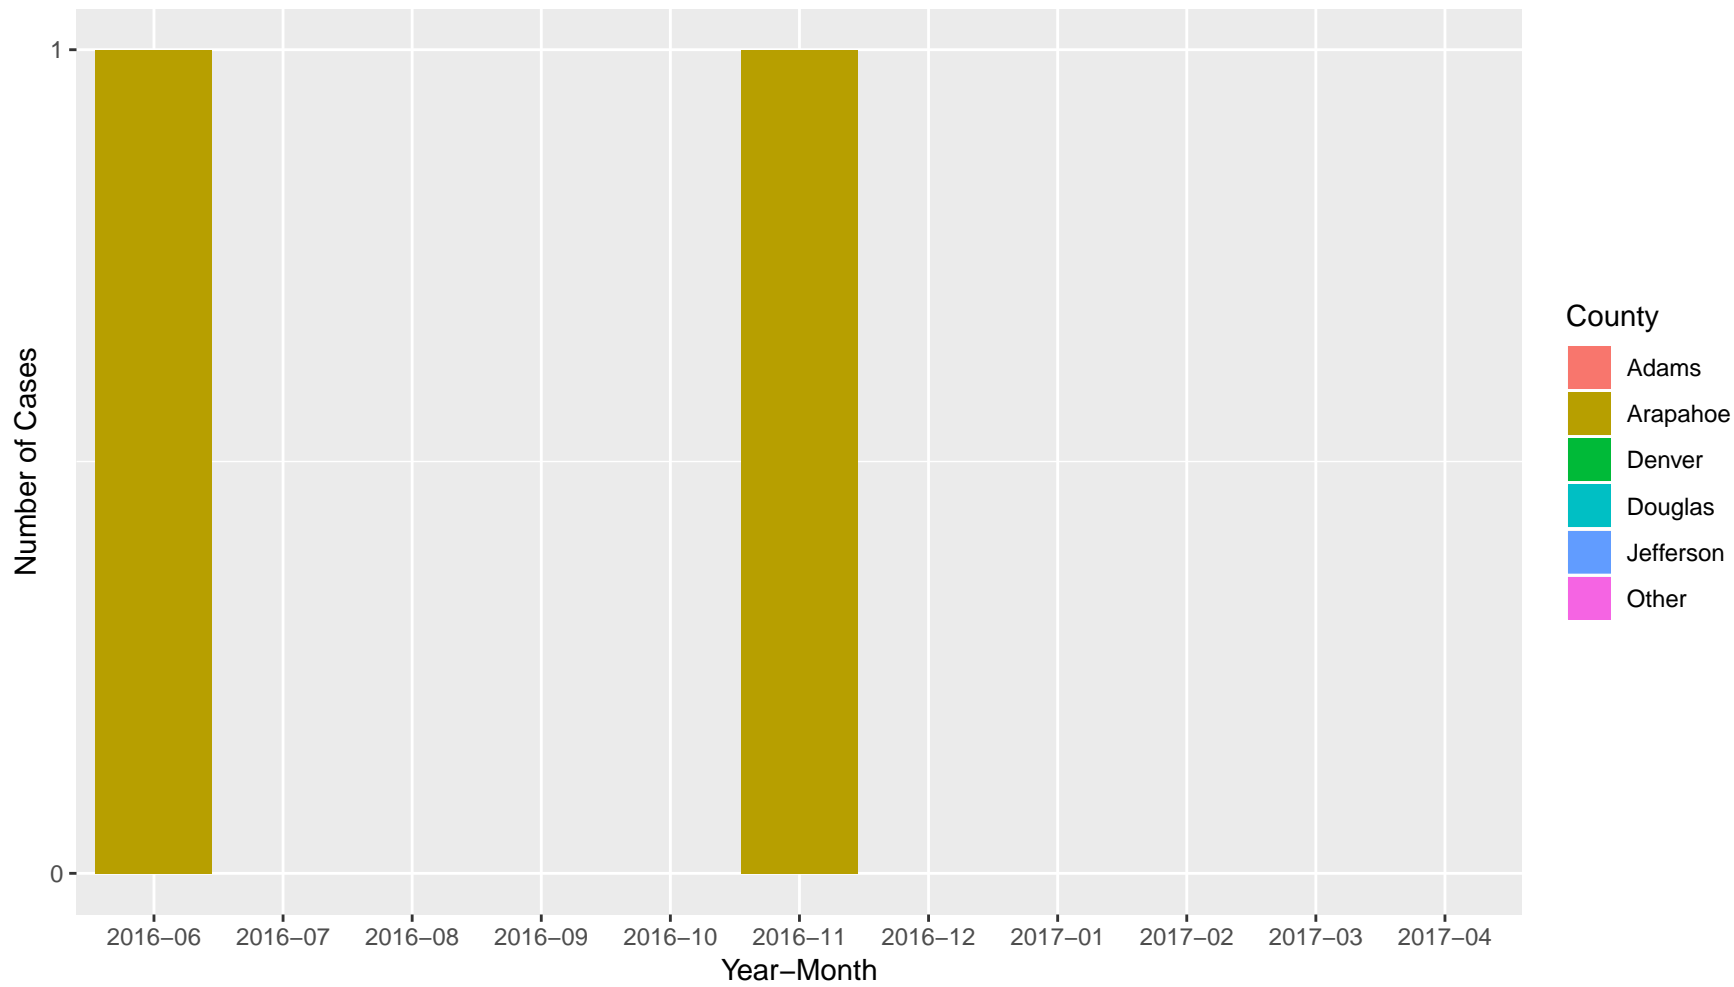

# emm87\_Cluster3

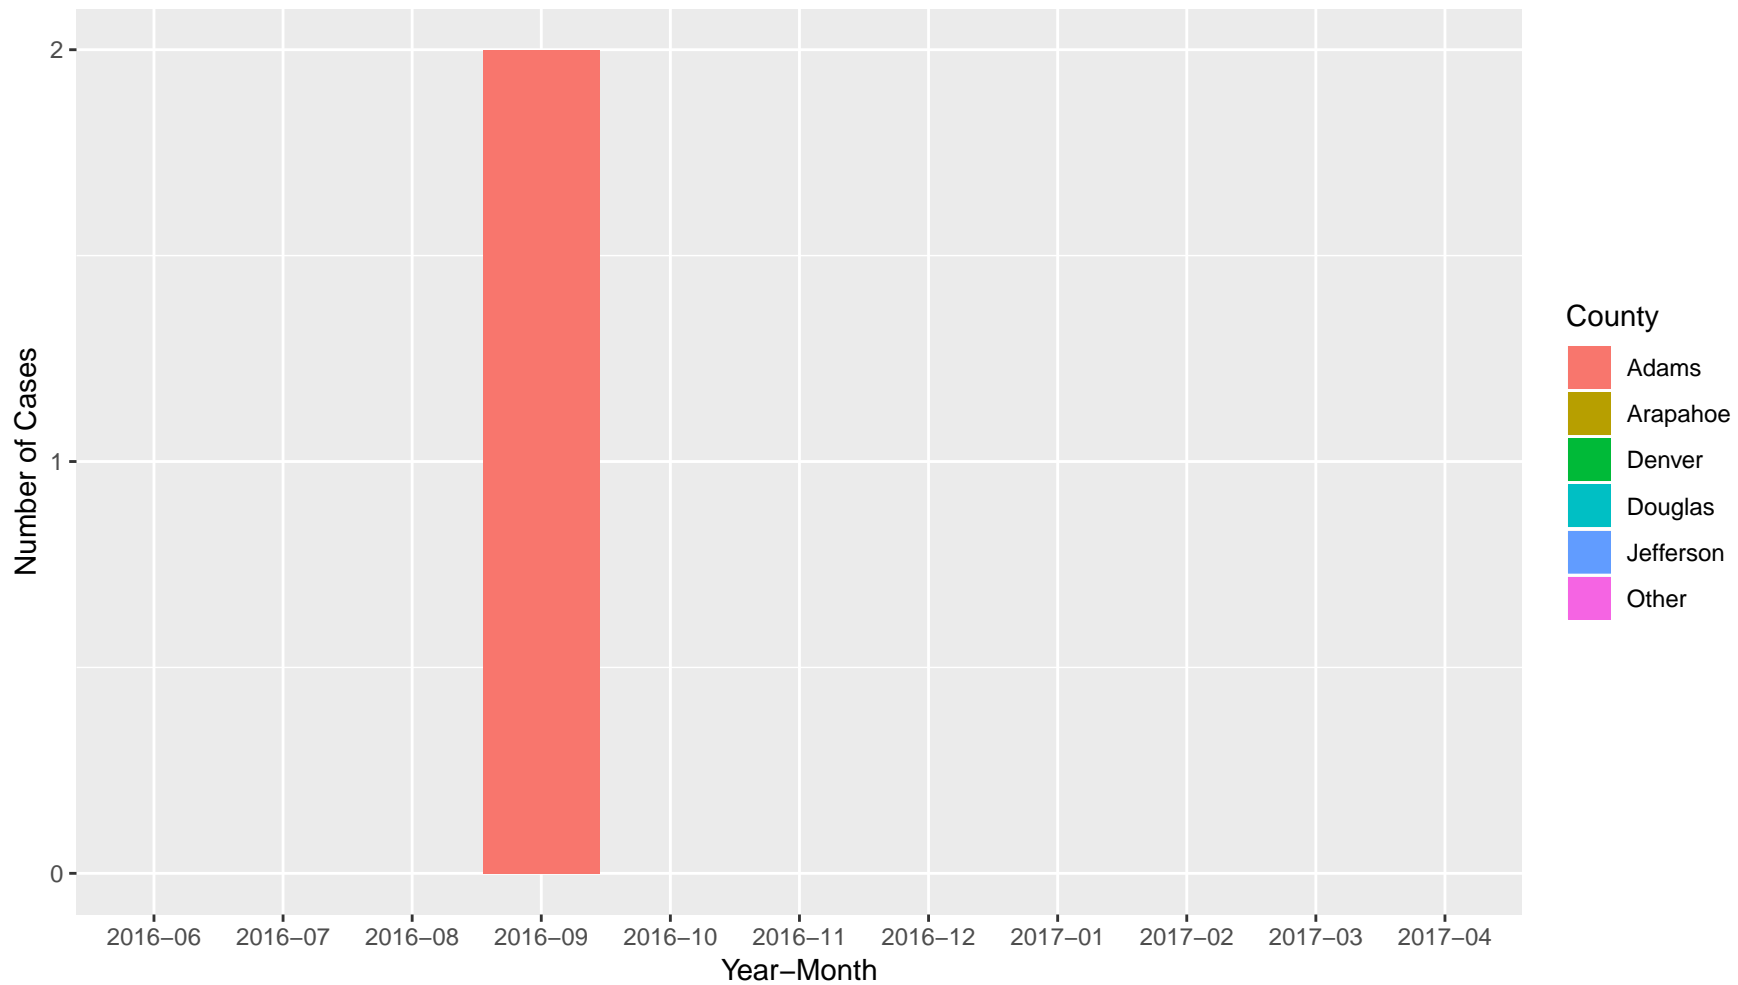

# emm89\_Cluster19



# emm89\_Cluster24

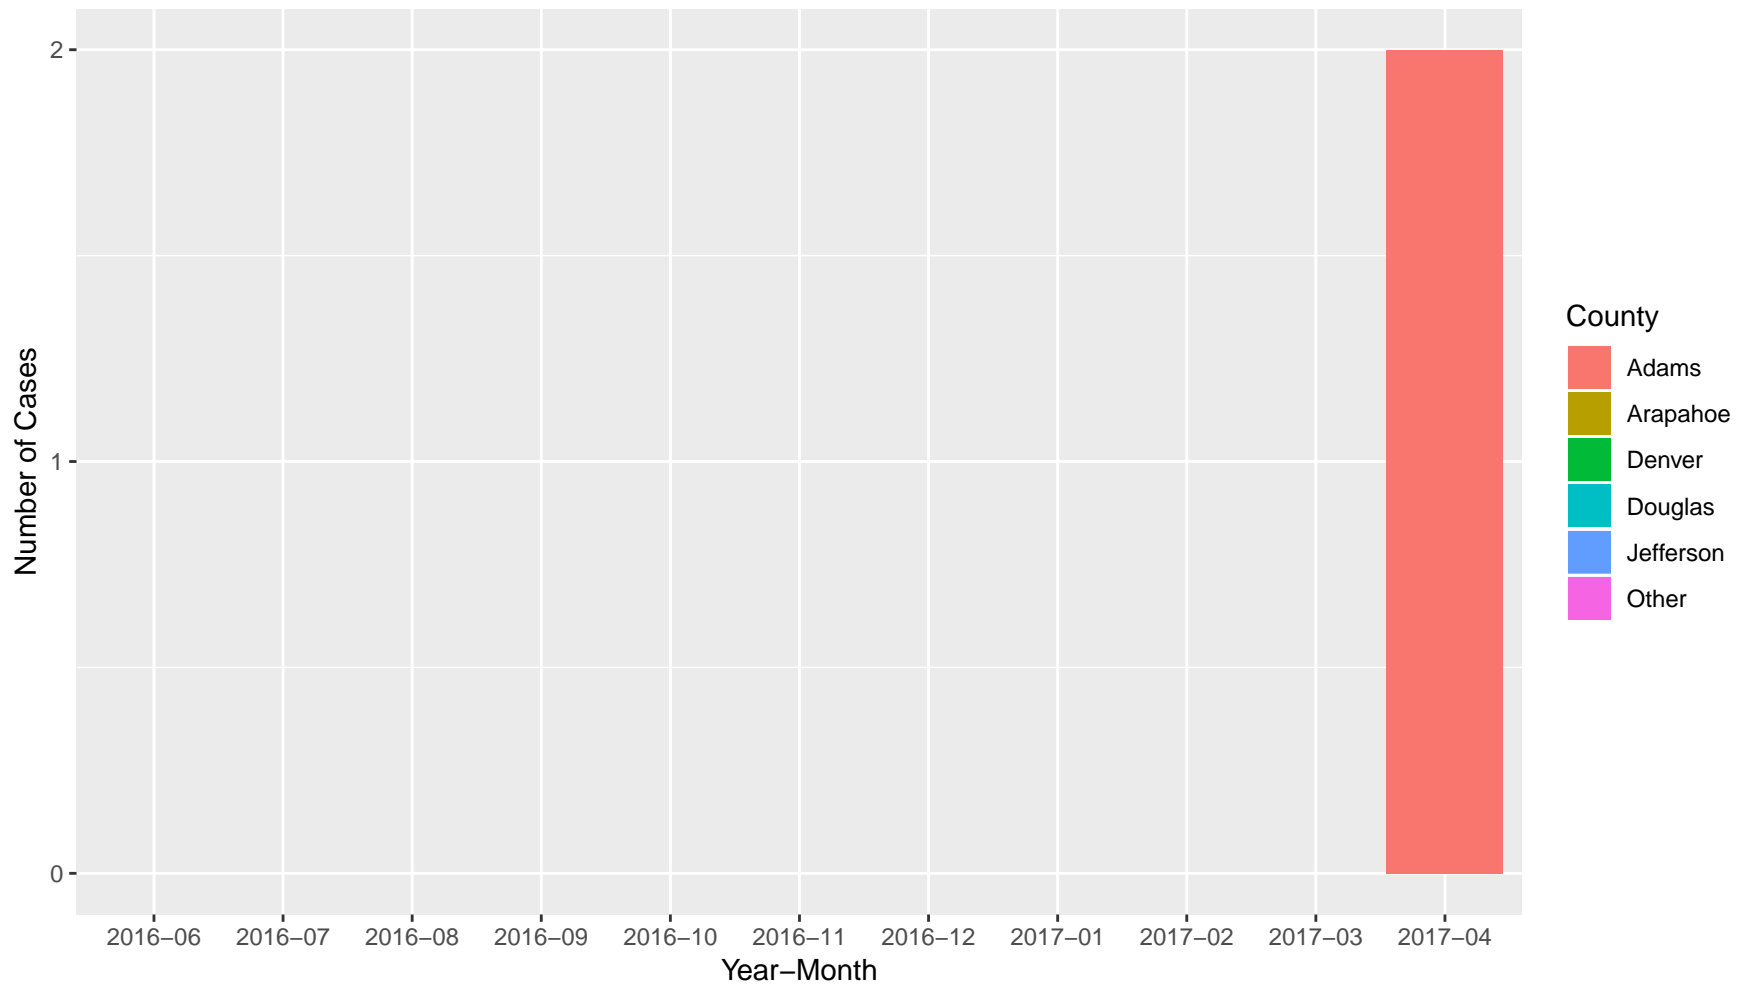

# emm89\_Cluster33

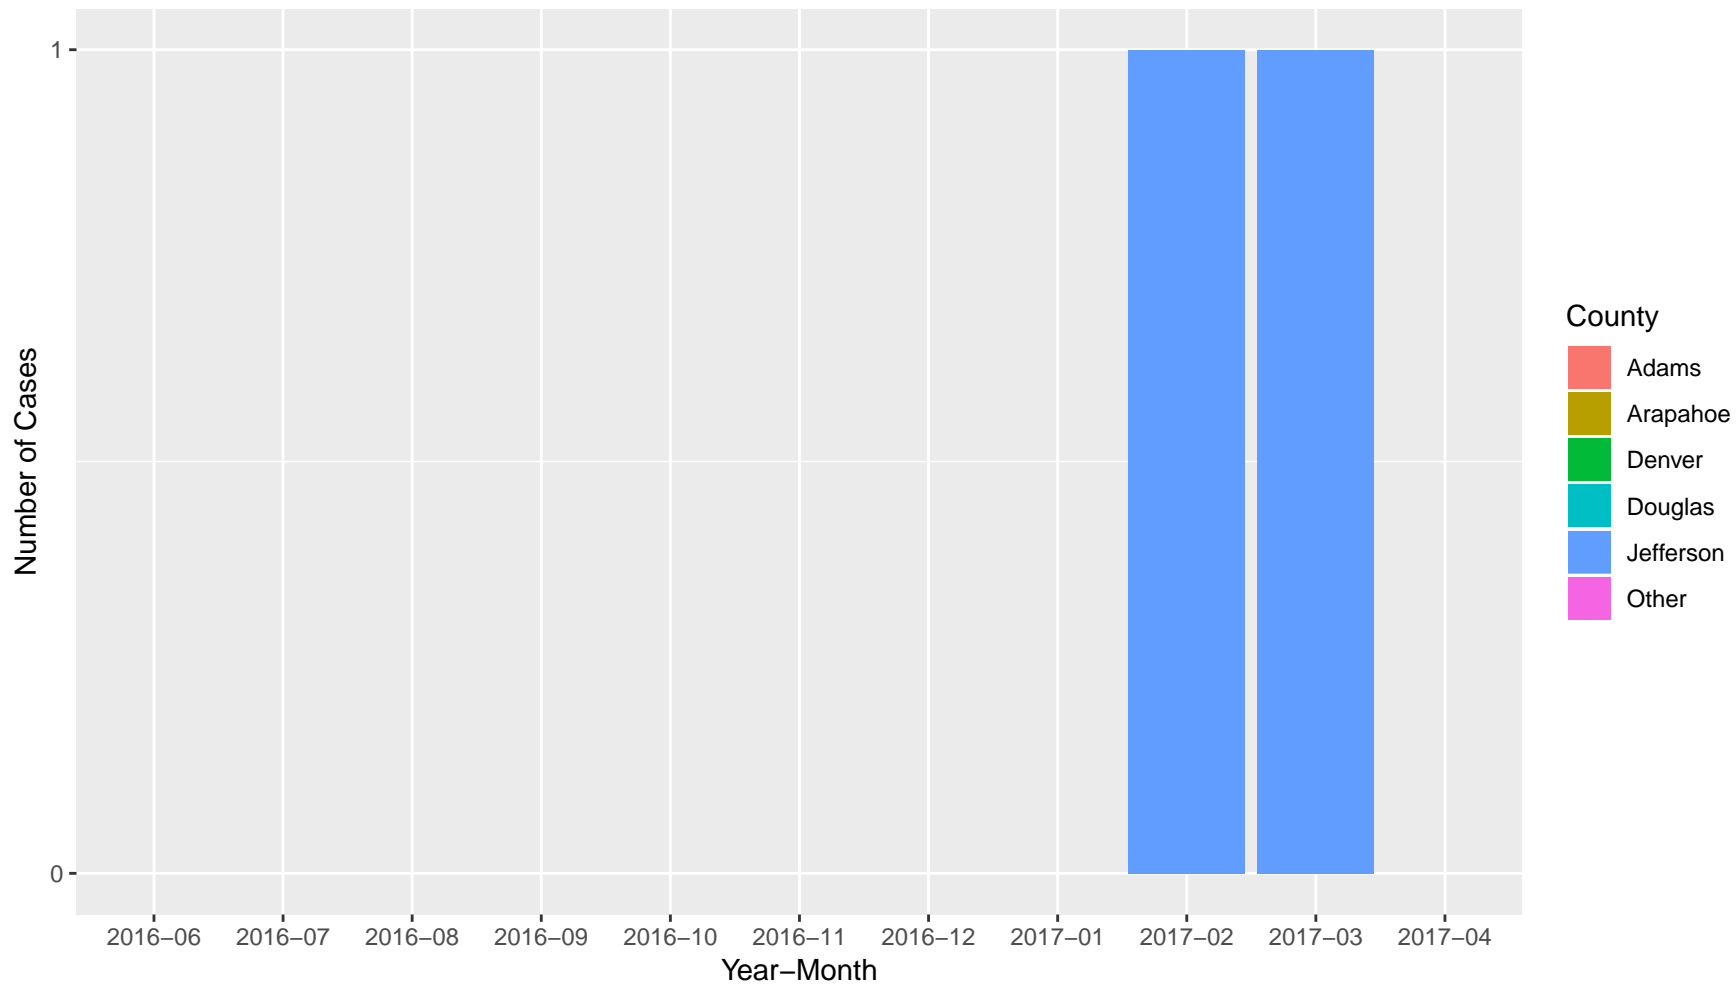

# emm89\_Cluster6

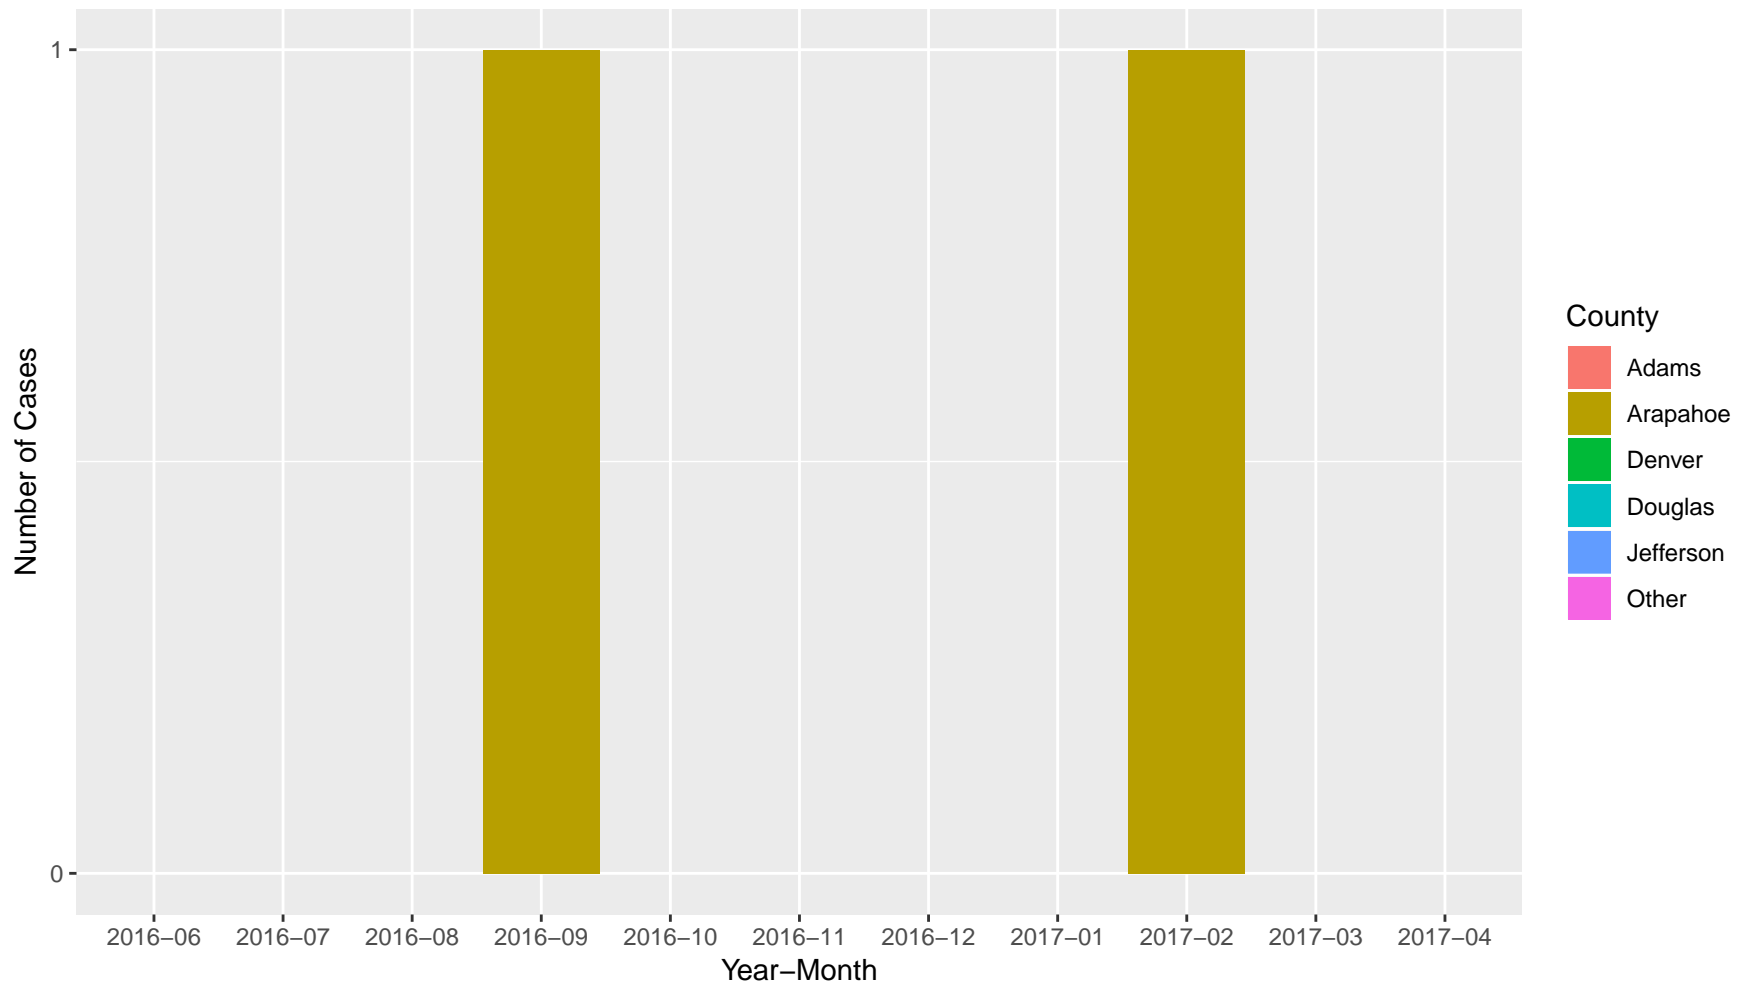

# emm89\_Cluster8

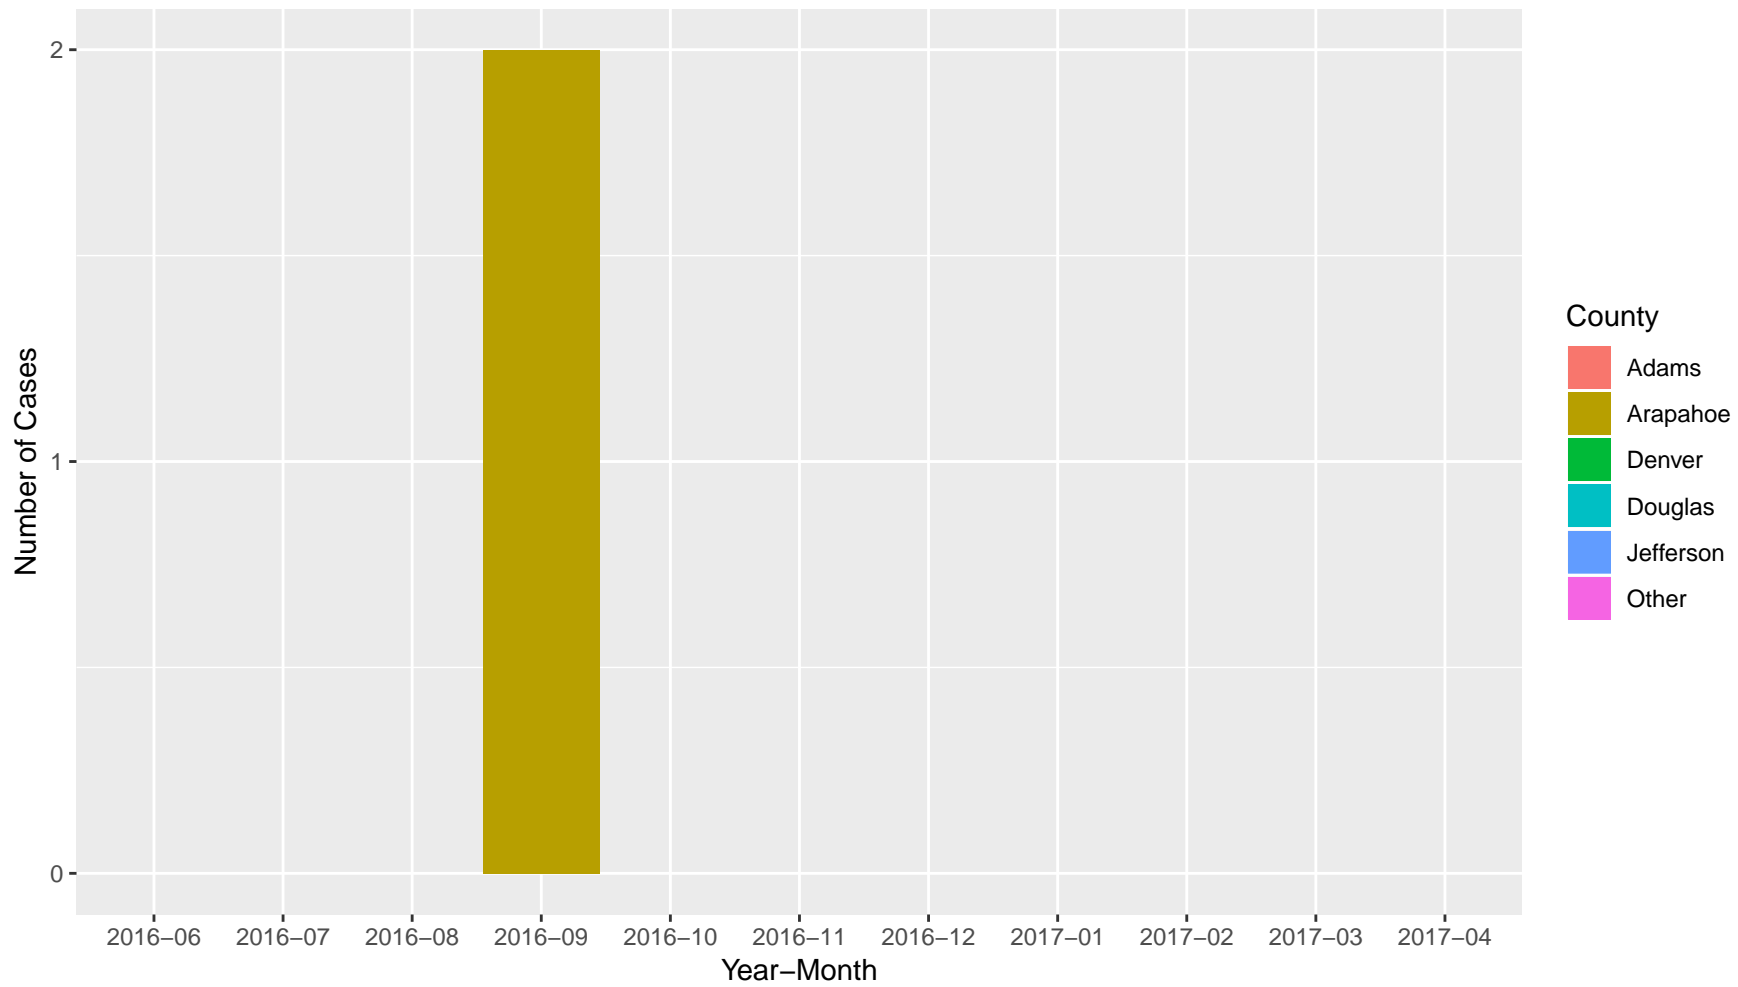

*emm92\_Cluster2*

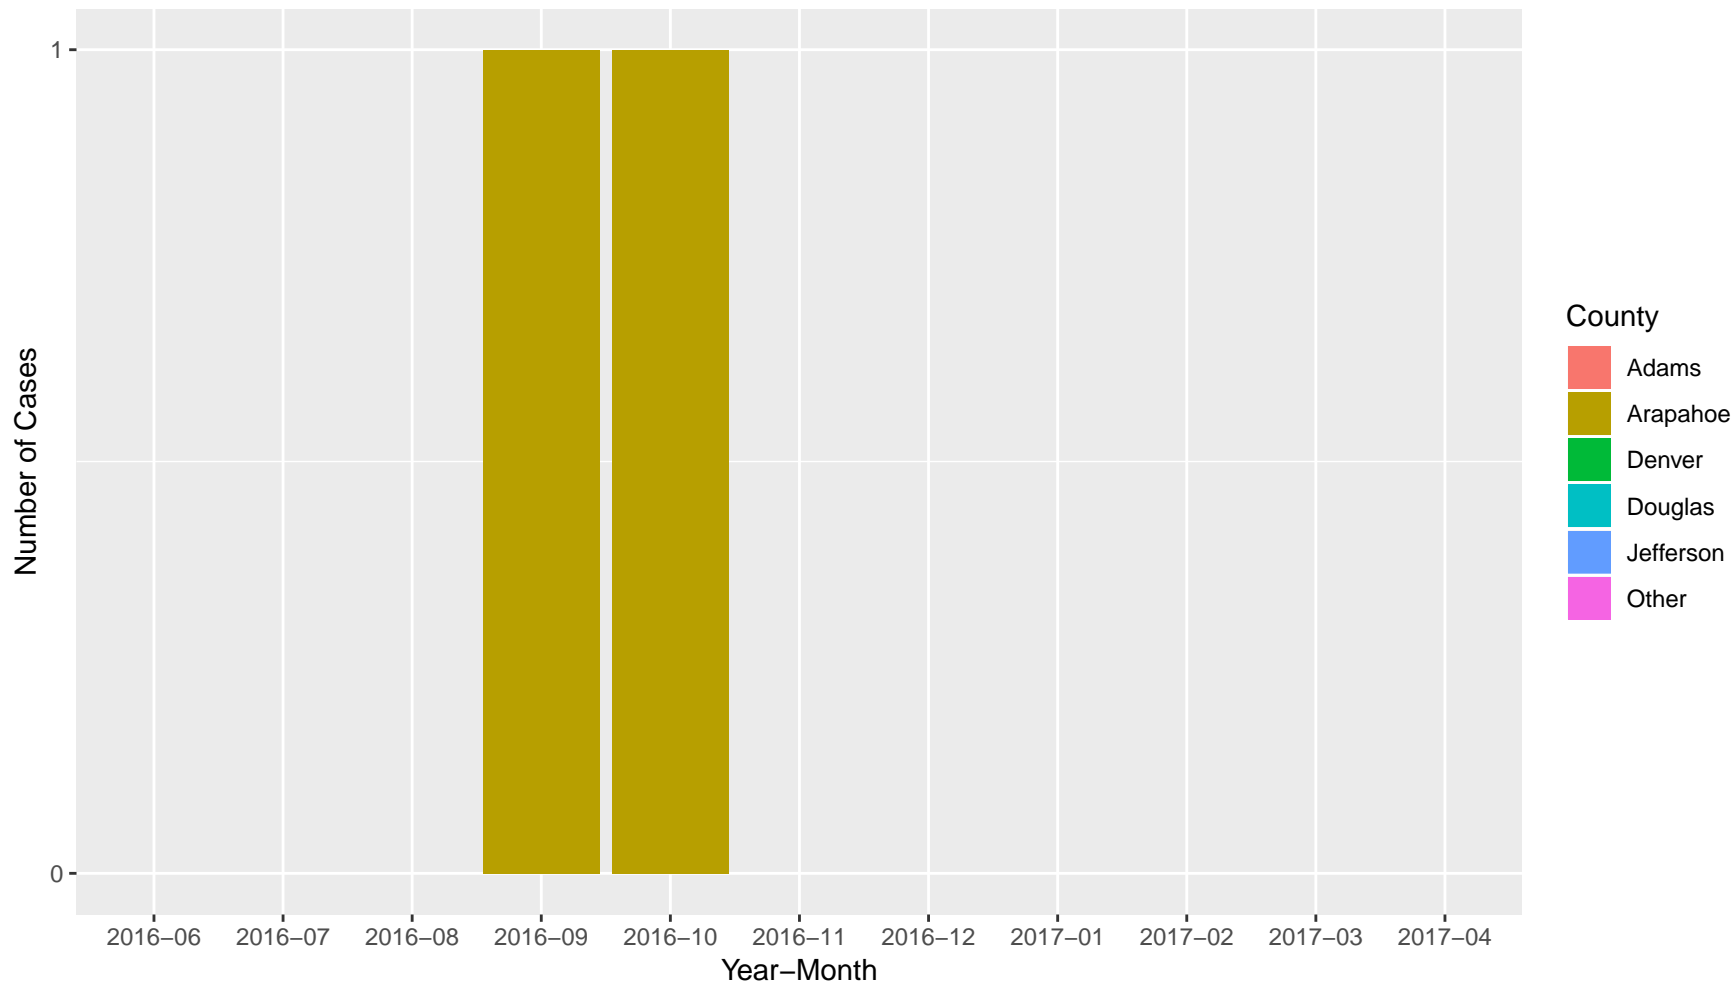



*emm95\_Cluster1*

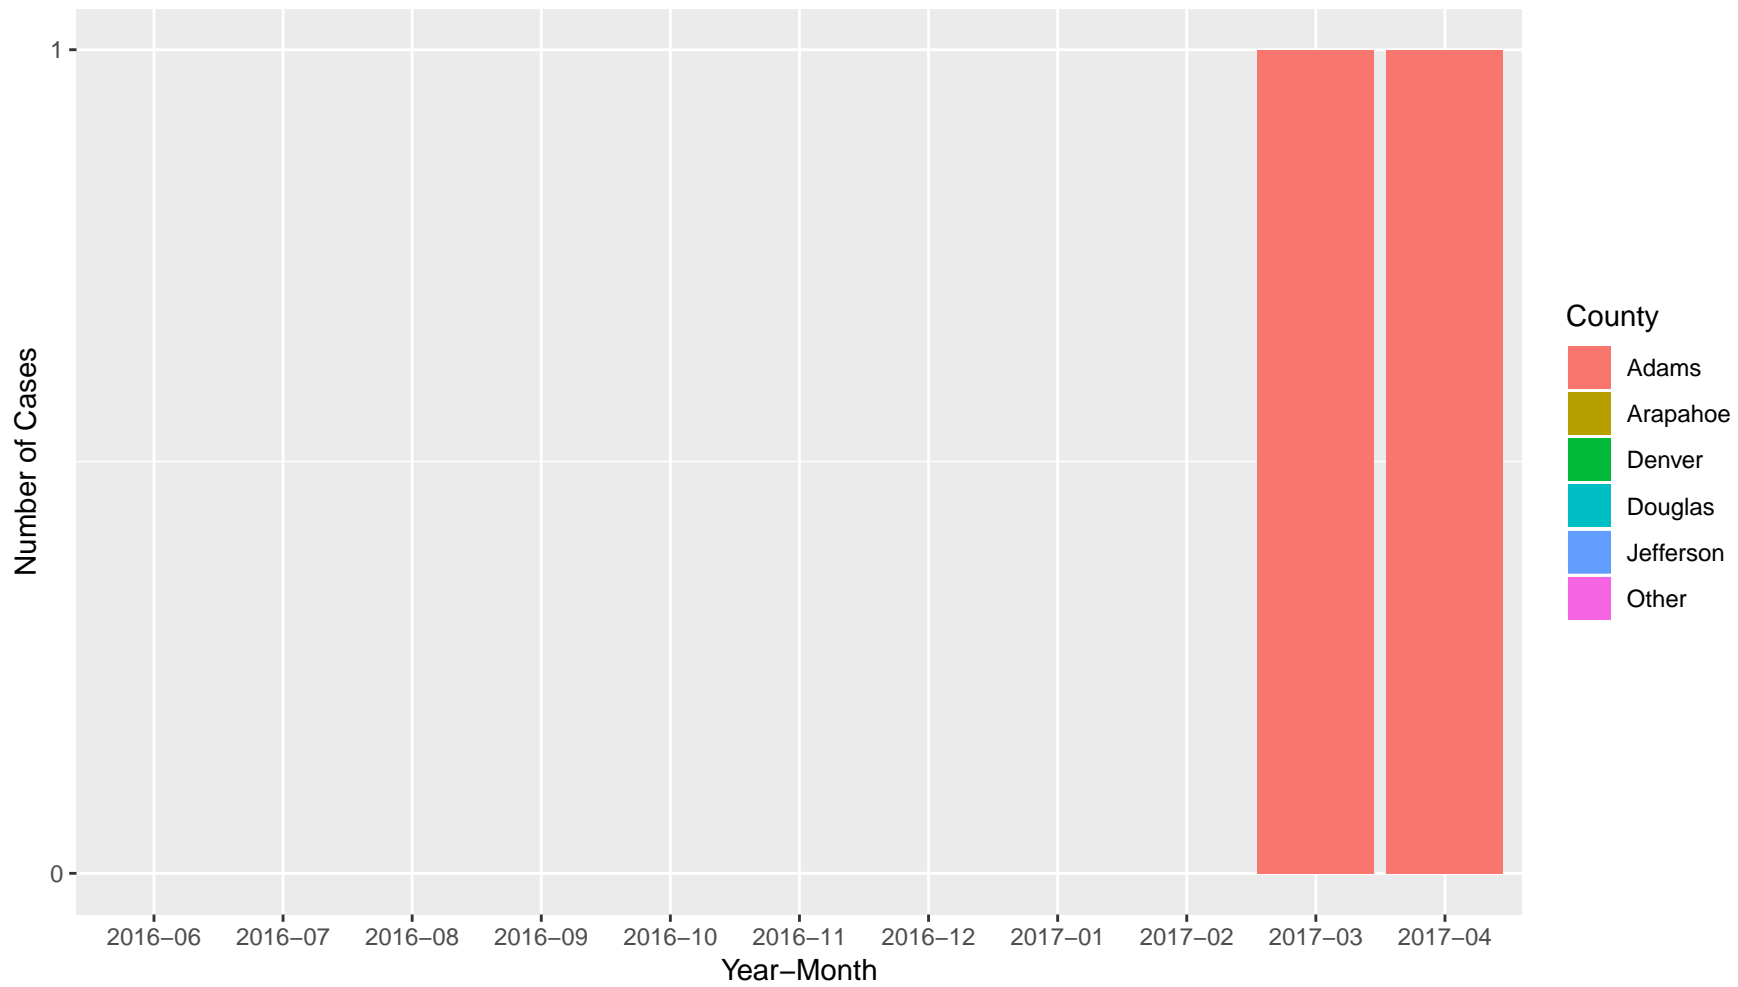

Supplement: NIHMS1798262-supplement-FigureS2.pdf [file NIHMS1798262-supplement-FigureS2.pdf]
