# Supplementary material
Source: PubMed Central journal article supplement (PMC9125432)
Supplement: NIHMS1798262-supplement-FigureS3.pdf [file NIHMS1798262-supplement-FigureS3.pdf]

*emm1*

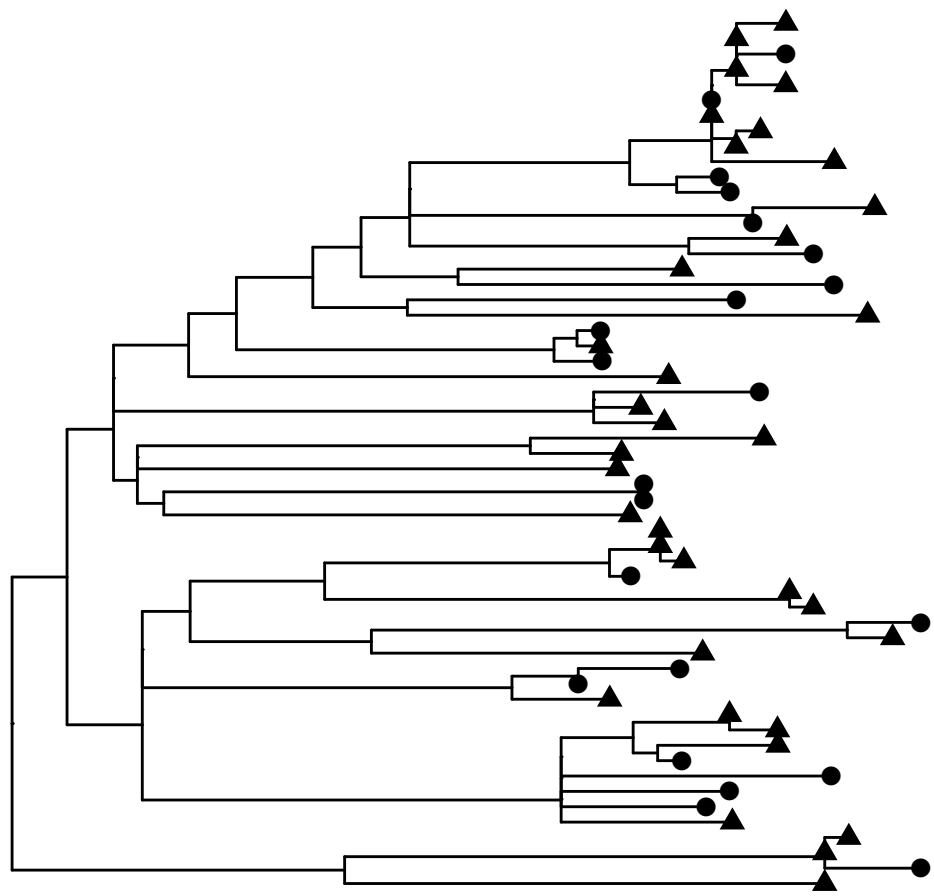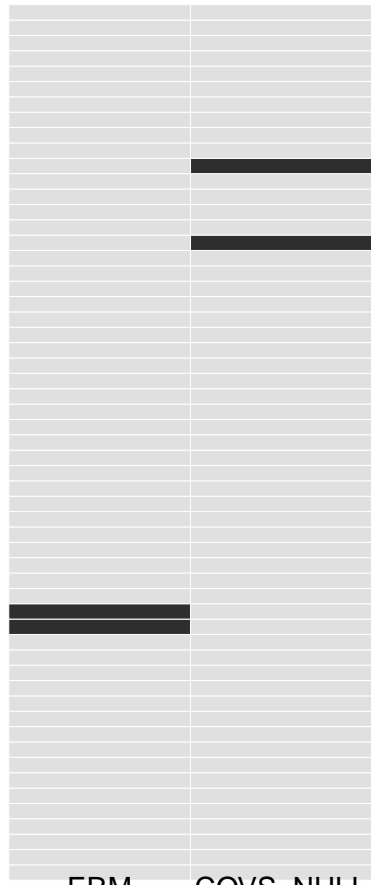

● Invasive  
▲ Pharyngitis

No  
Yes

ERM COVS\_NULL

*emm11*

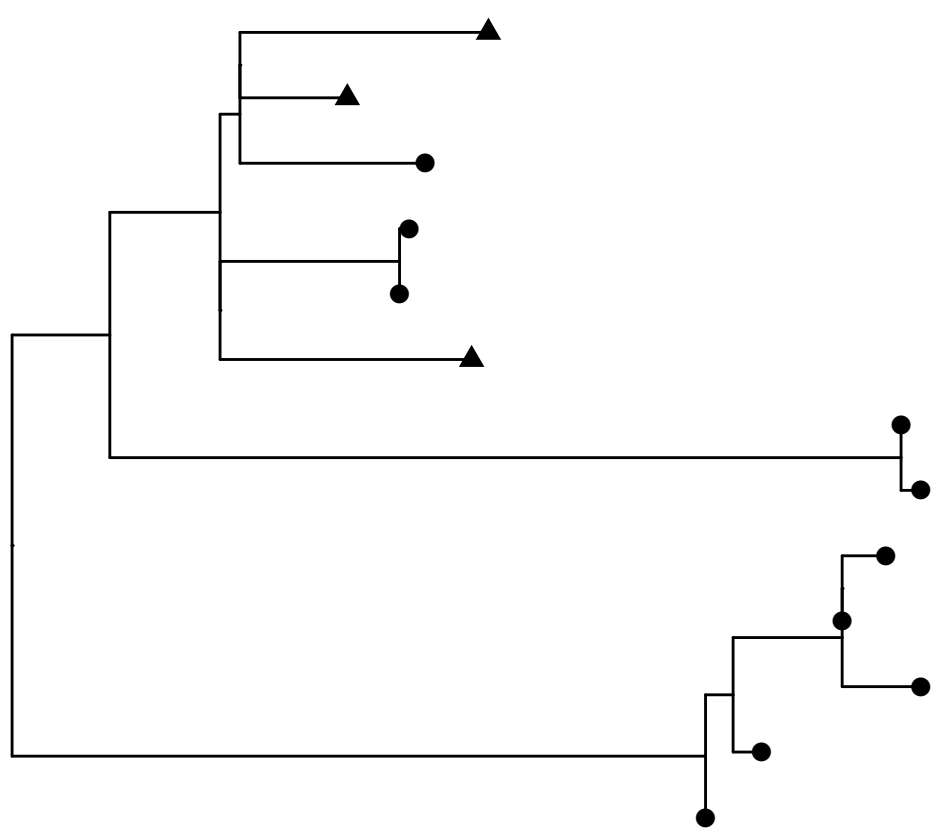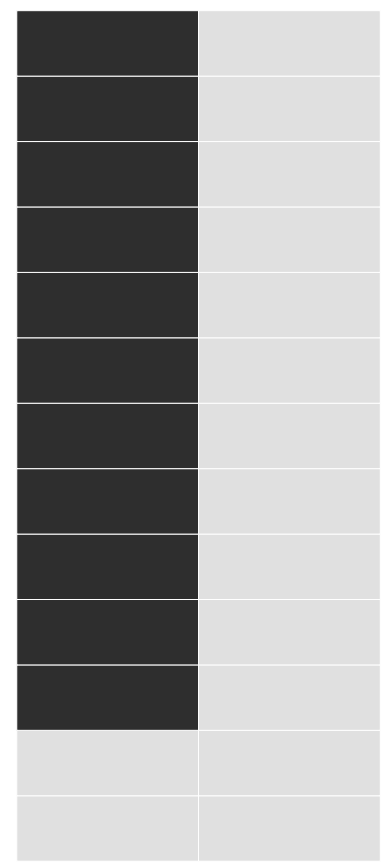

● Invasive  
▲ Pharyngitis

ERM COVS\_NULL

*emm118*

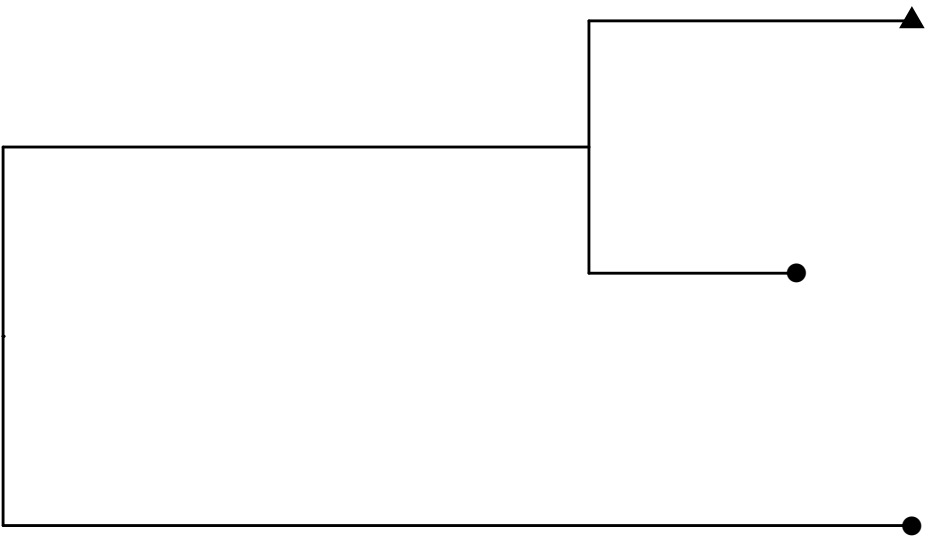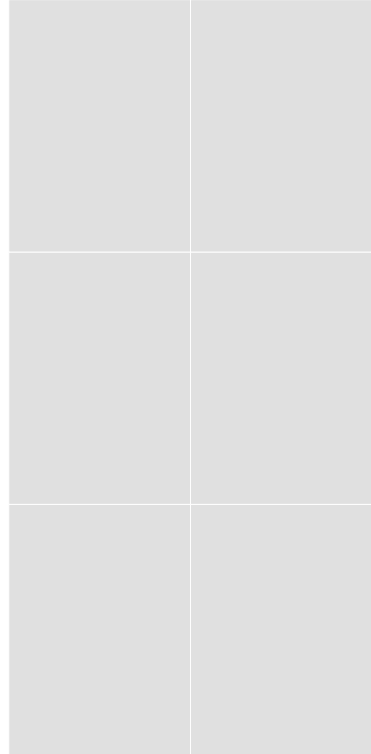

■ No

● Invasive

▲ Pharyngitis

ERM

COVS\_NULL

*emm12*

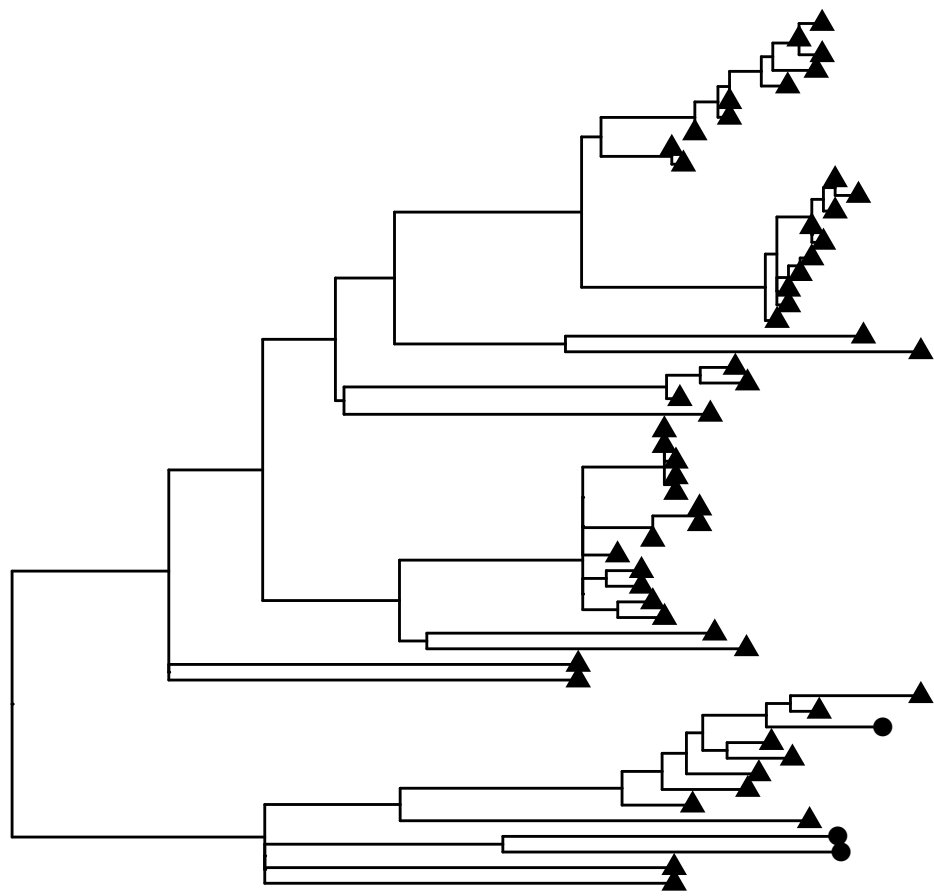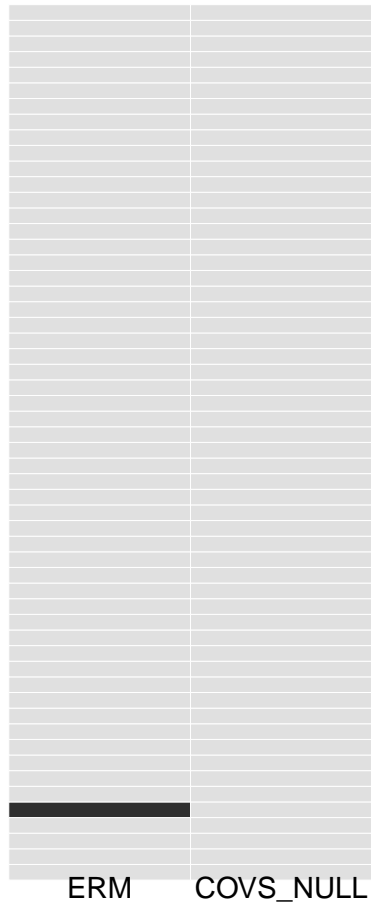

● Invasive  
▲ Pharyngitis

■ No  
■ Yes

*emm169*

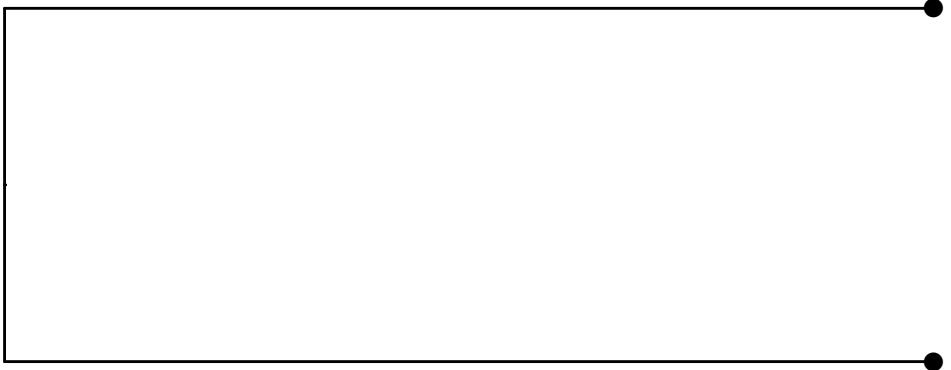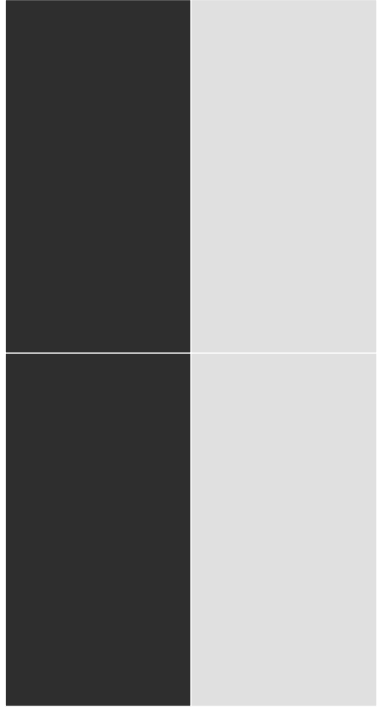

No  
Yes  
● Invasive

ERM COVS\_NULL

*emm2*

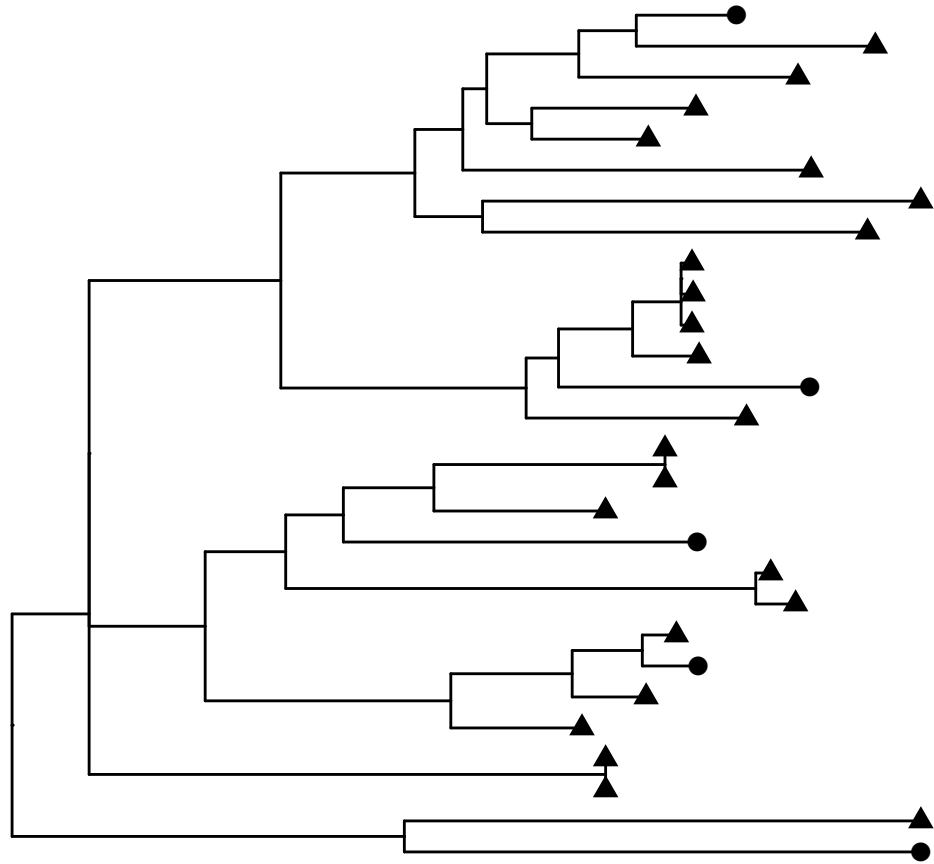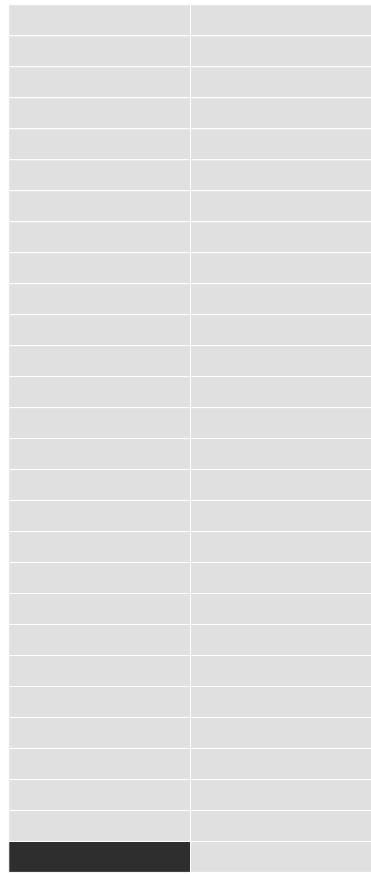

● Invasive  
▲ Pharyngitis

ERM COVS\_NULL

emm22

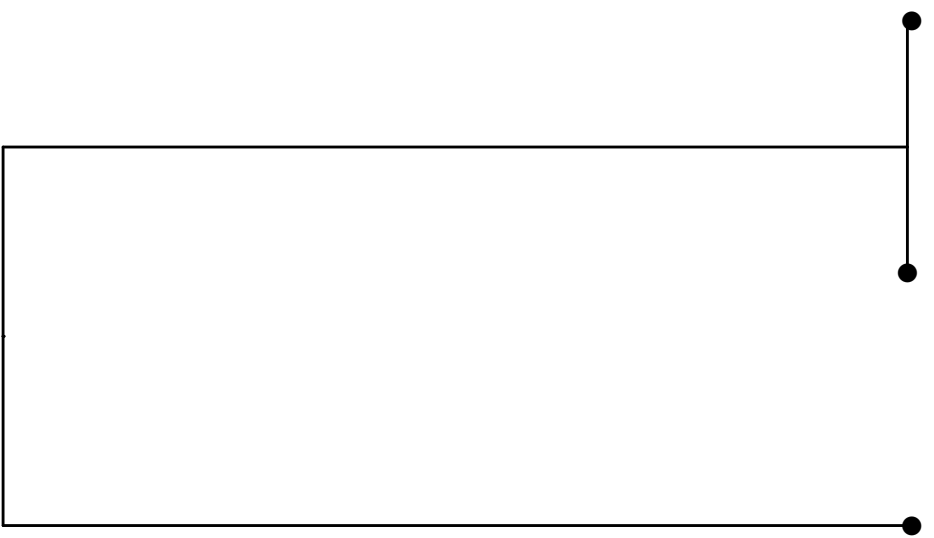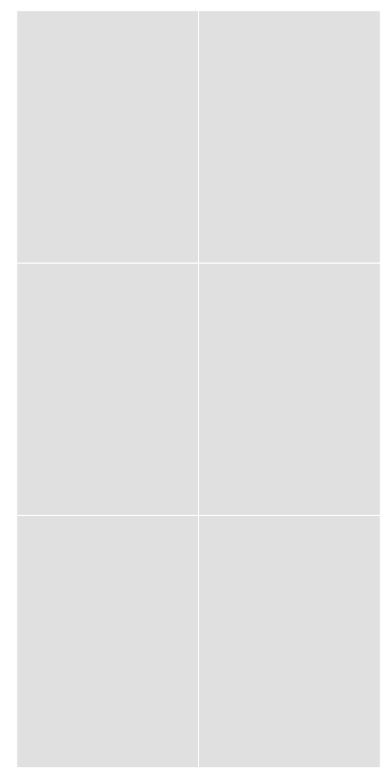

ERM COVS\_NULL

● No  
● Pharyngitis

emm28

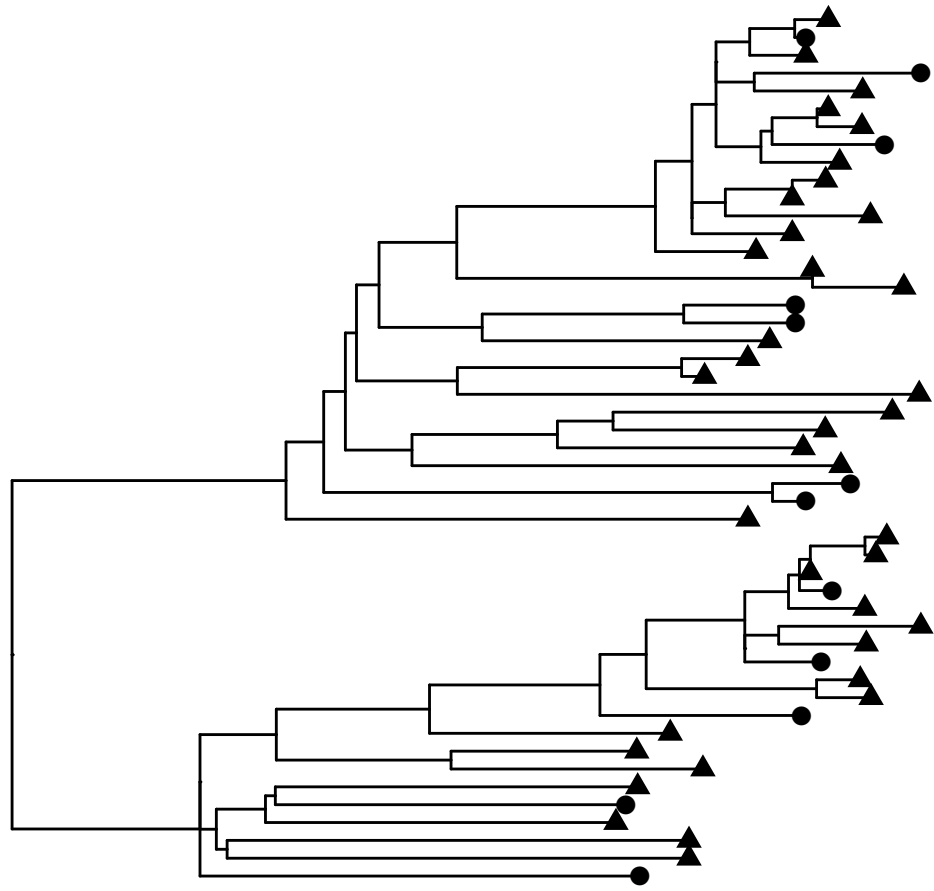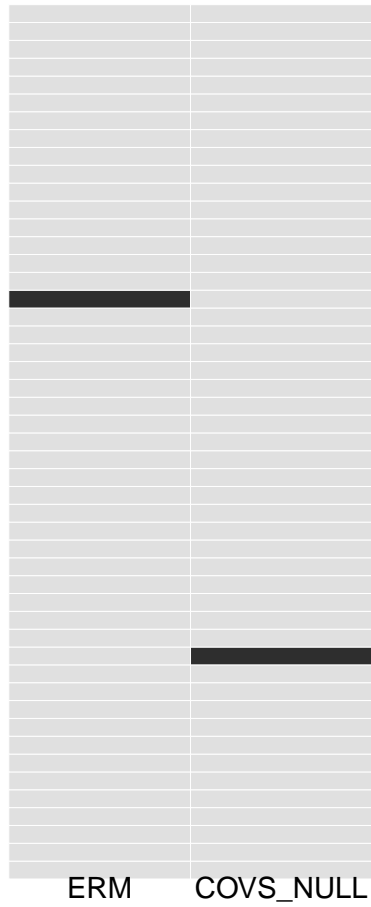

● Invasive  
▲ Pharyngitis

■ No  
■ Yes



*emm3*

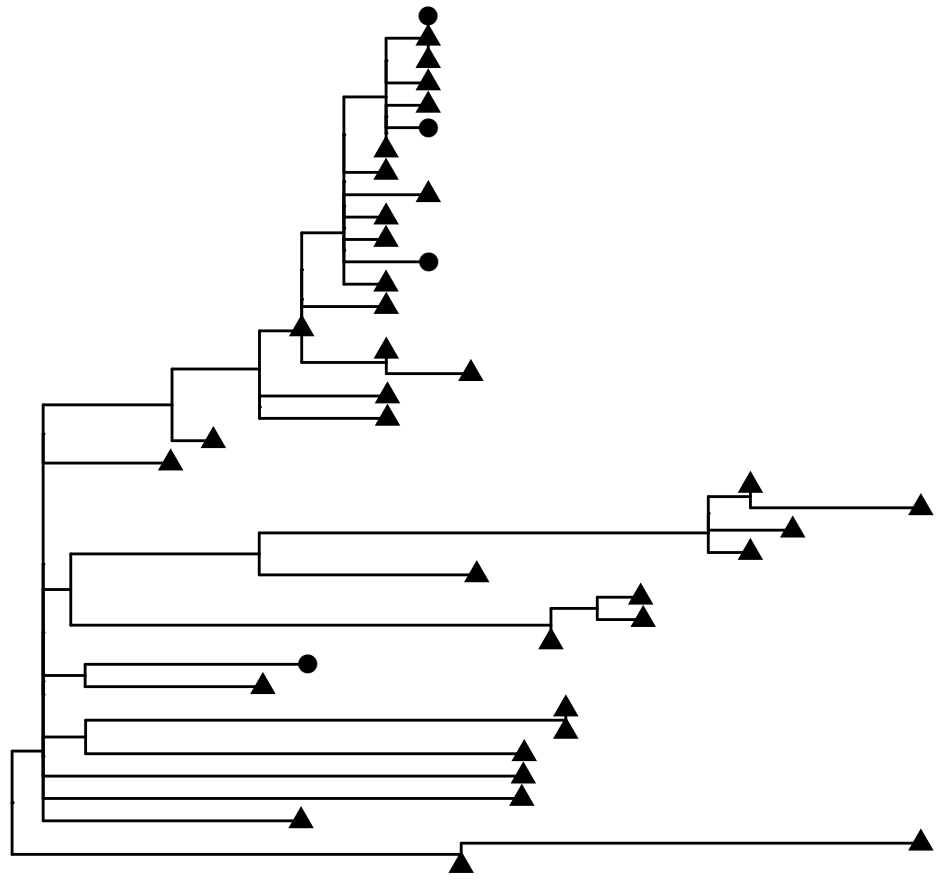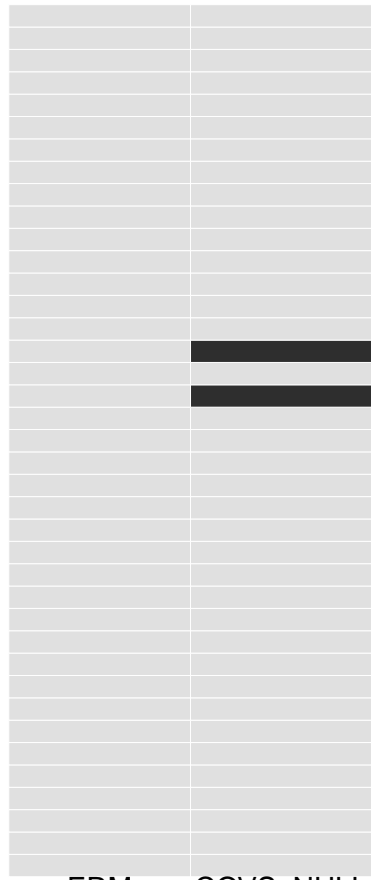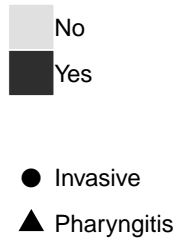

*emm4*

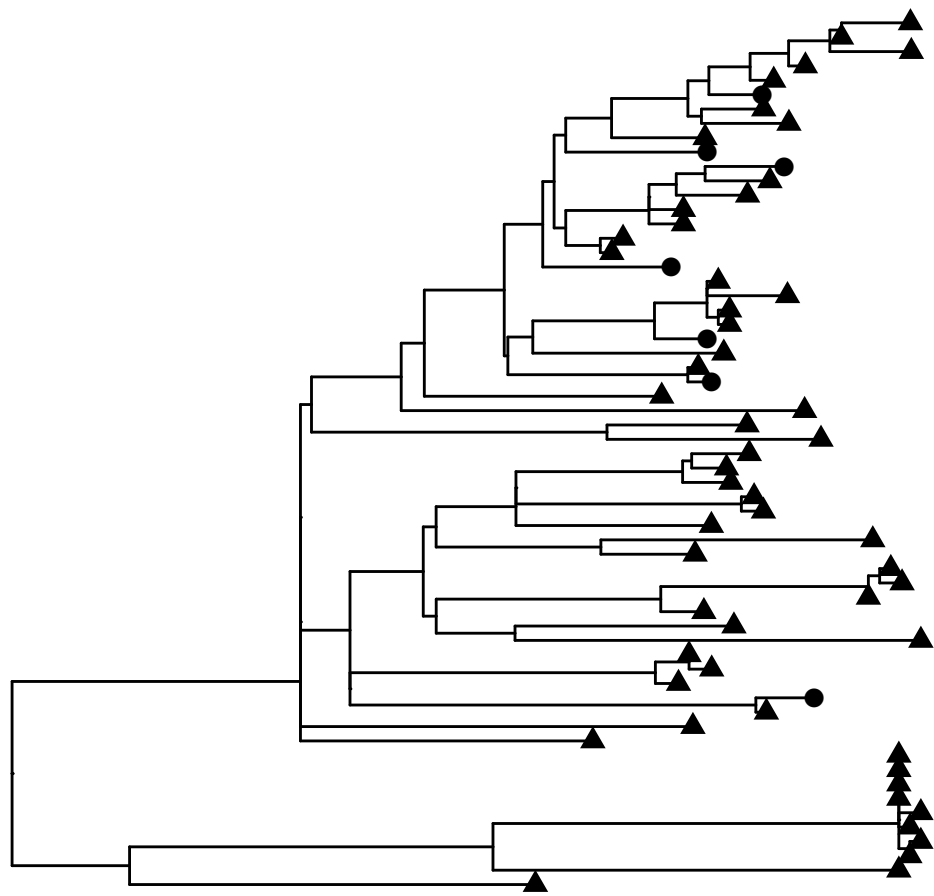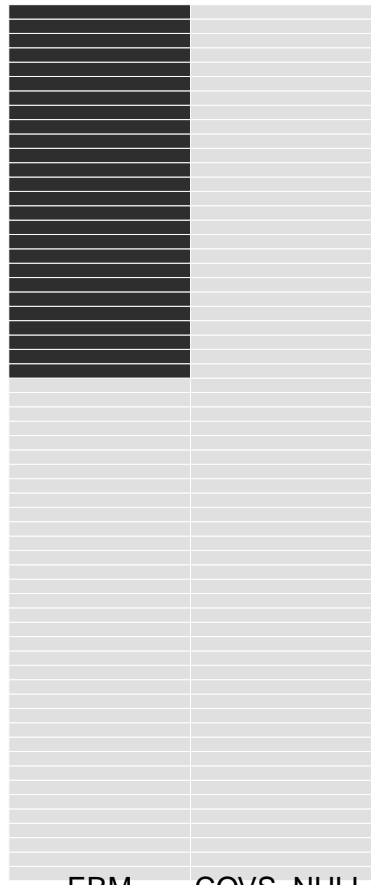

● Invasive  
▲ Pharyngitis

■ No  
■ Yes

ERM COVS\_NULL

*emm49*

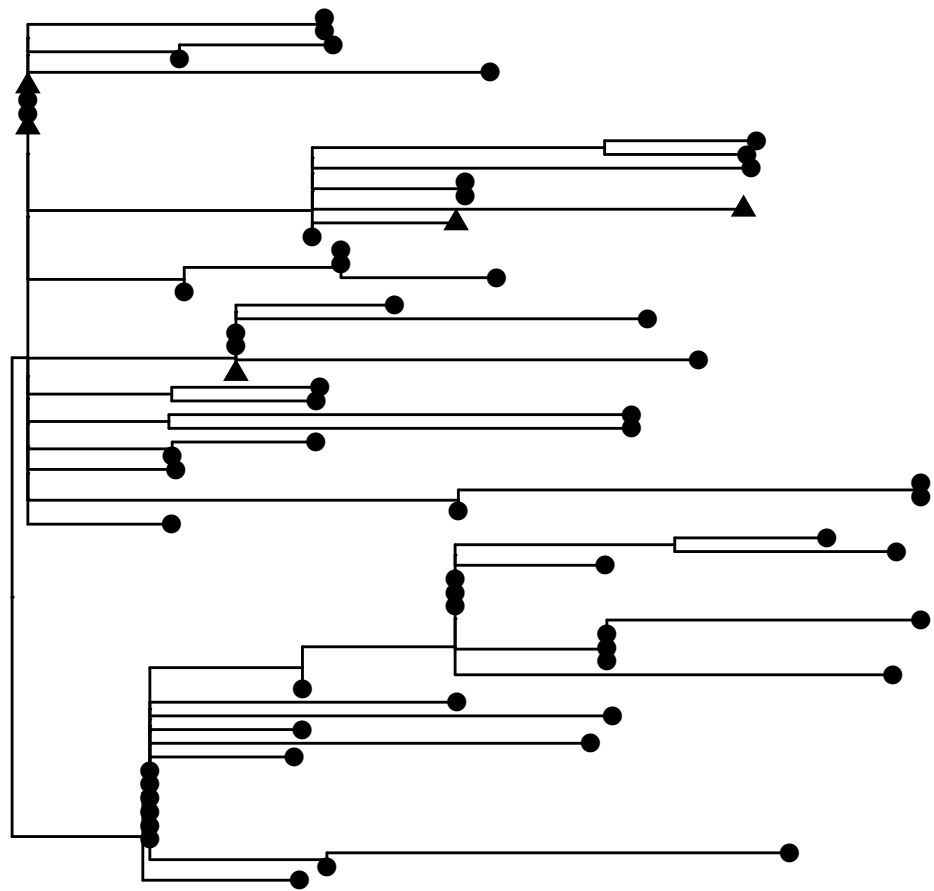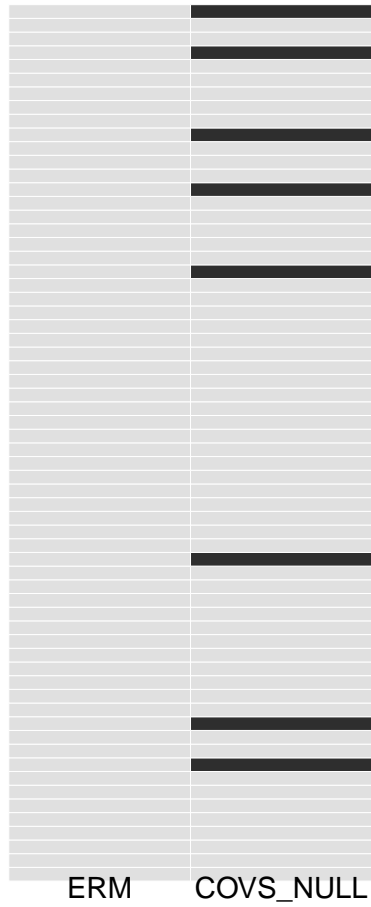

● Invasive  
▲ Pharyngitis

■ No  
■ Yes

*emm59*

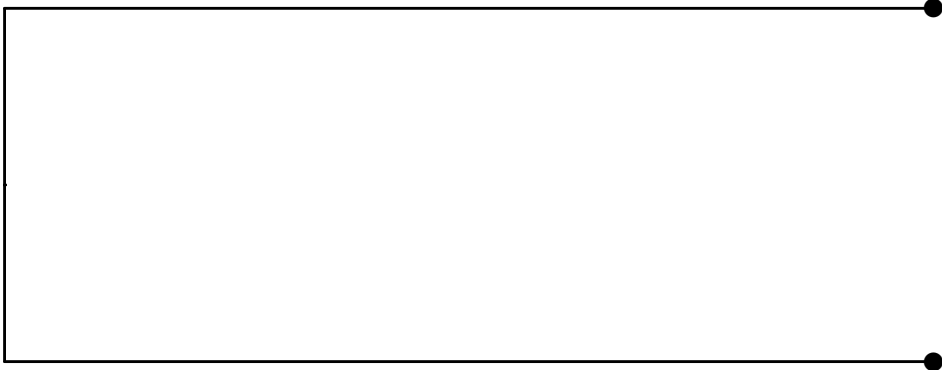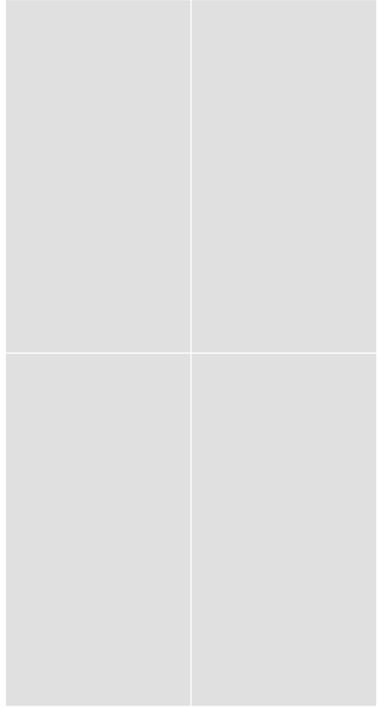

● No  
● Invasive

ERM COVS\_NULL

*emm6*

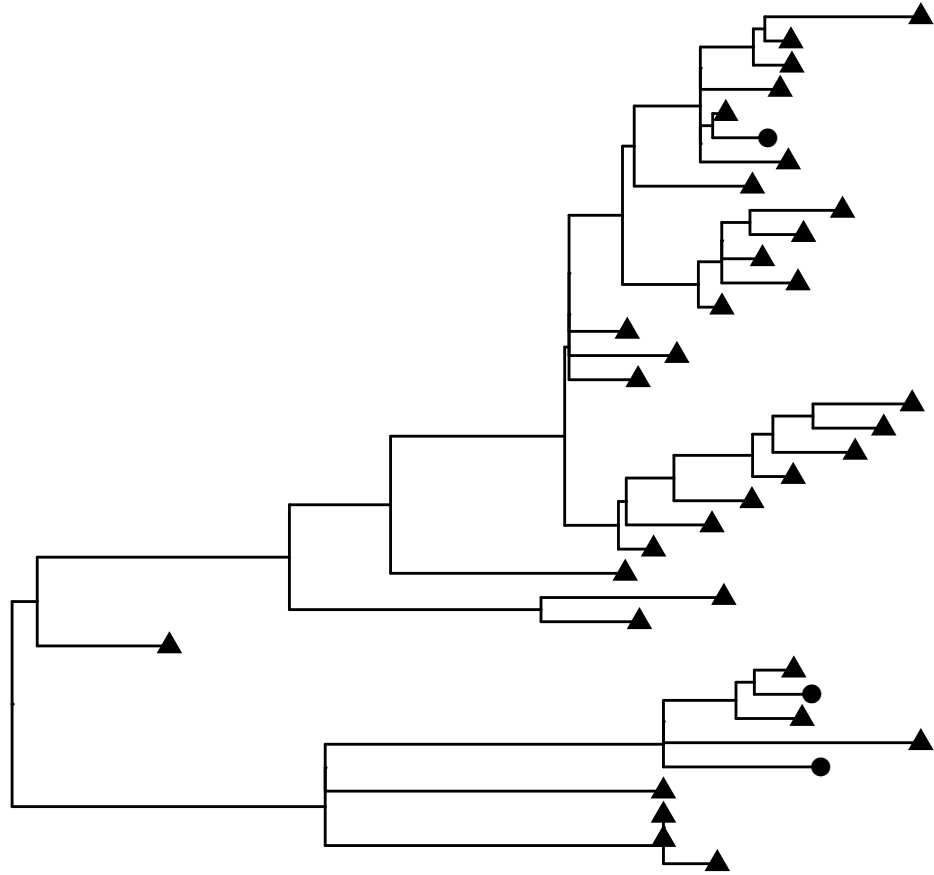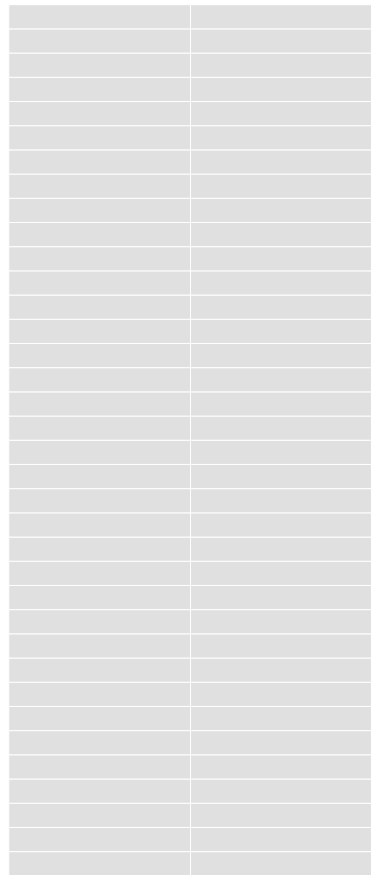

- No
- Invasive
- Pharyngitis

ERM      COVS\_NULL

*emm60*

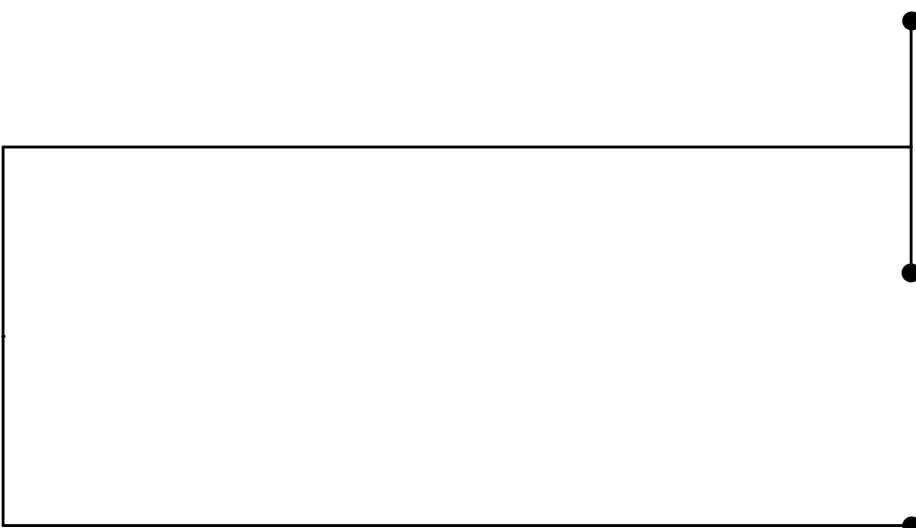

No

● Pharyngitis

ERM

COVS\_NULL

emm75

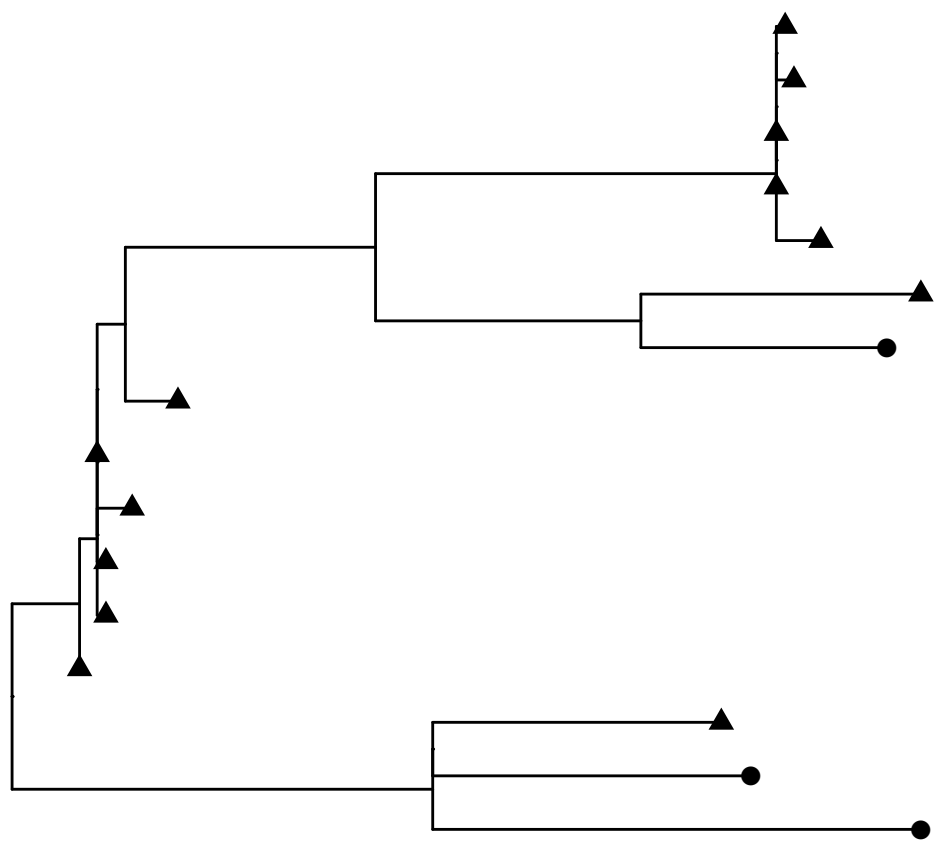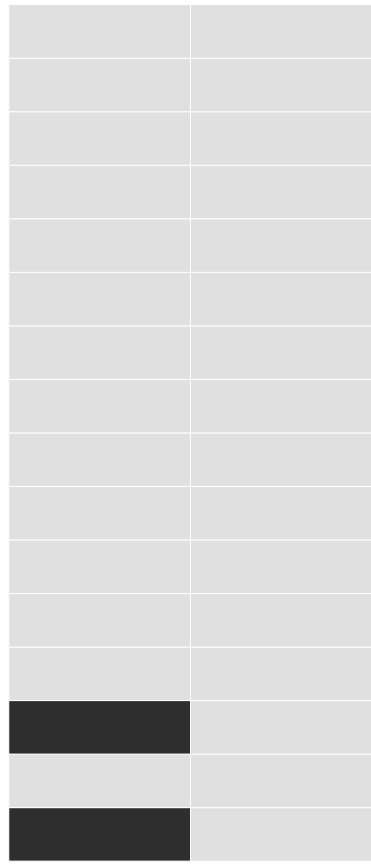

● Invasive  
▲ Pharyngitis

ERM COVS\_NULL

*emm76*

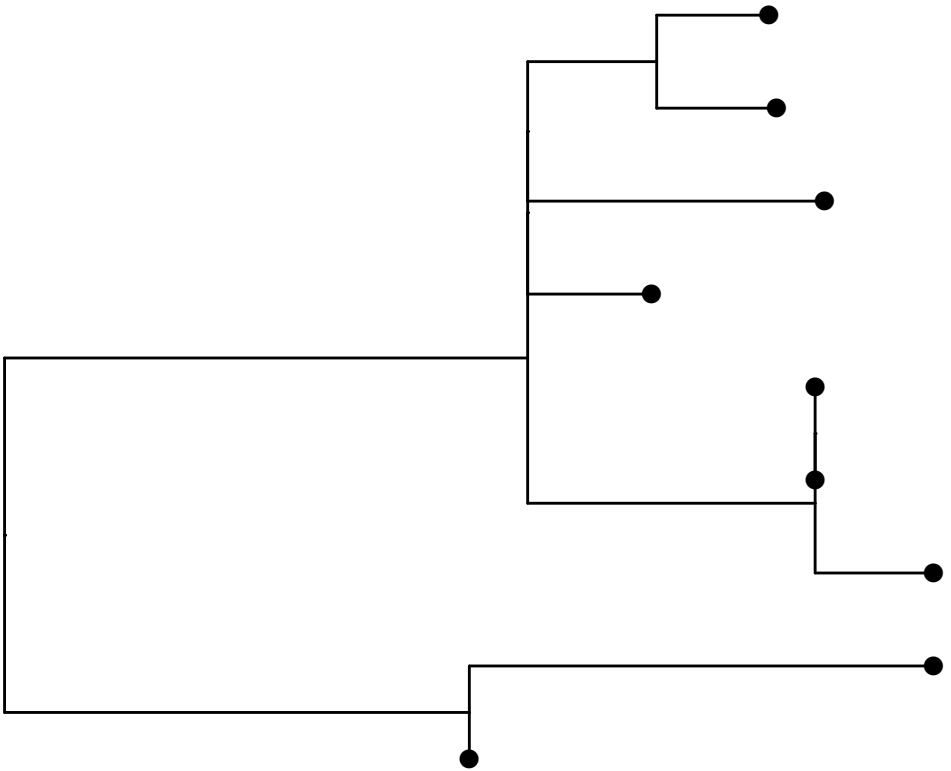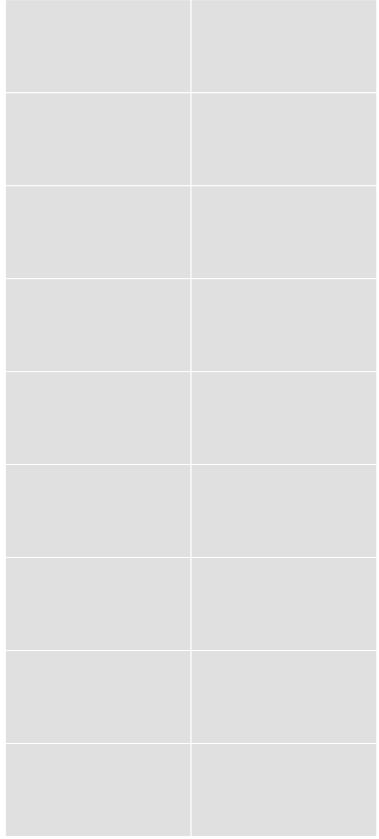

■ No  
● Invasive

ERM COVS\_NULL



emm77

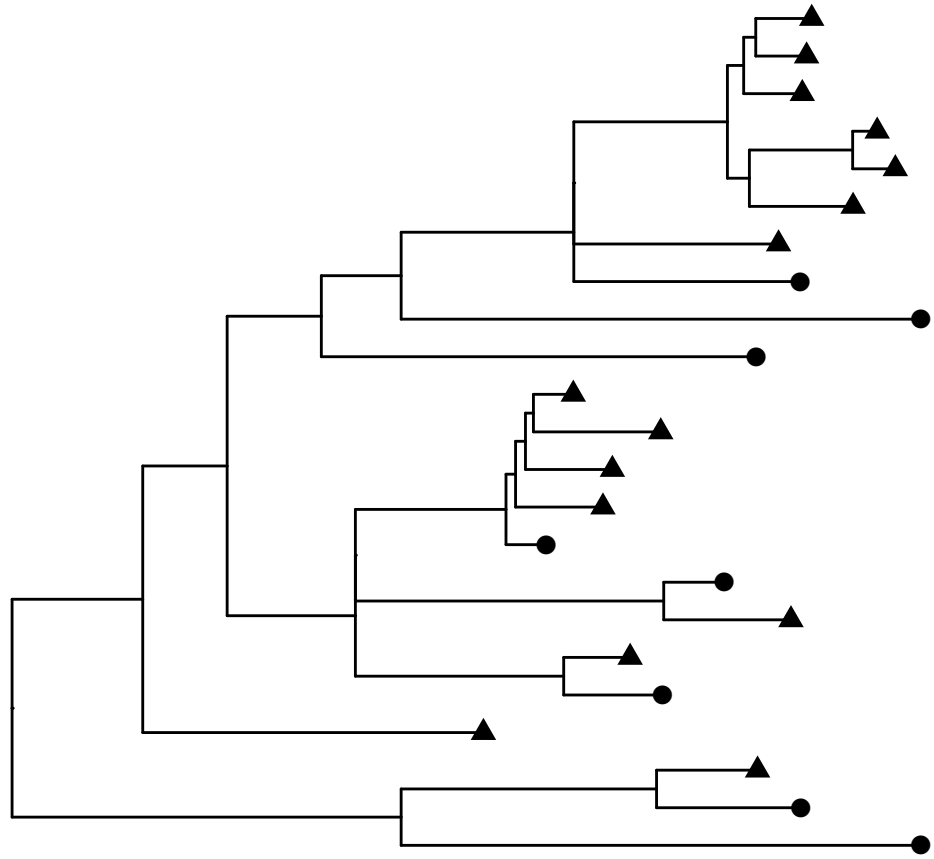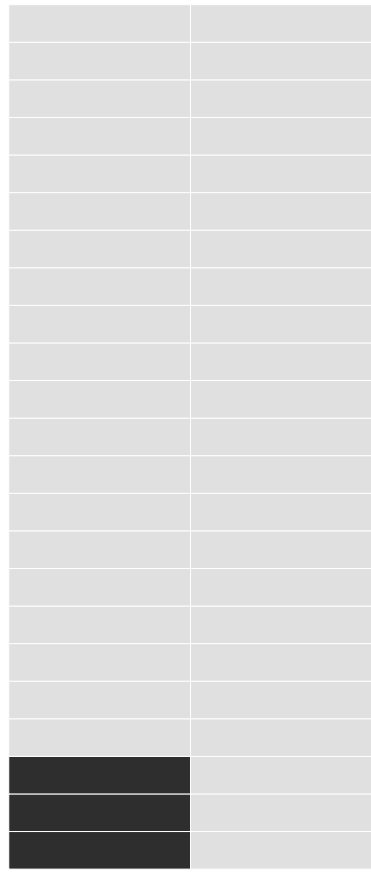

● Invasive  
▲ Pharyngitis

ERM COVS\_NULL

*emm81*

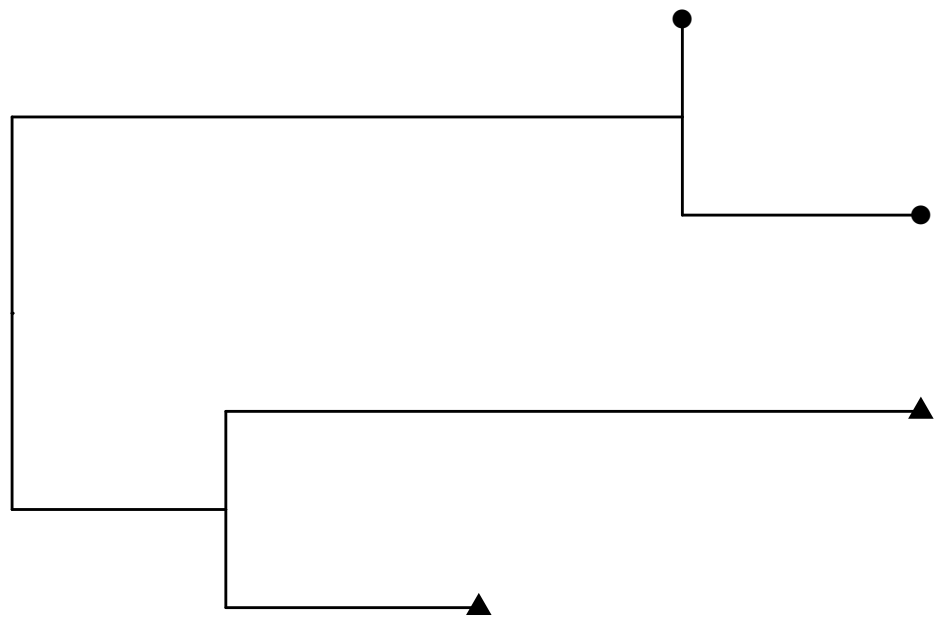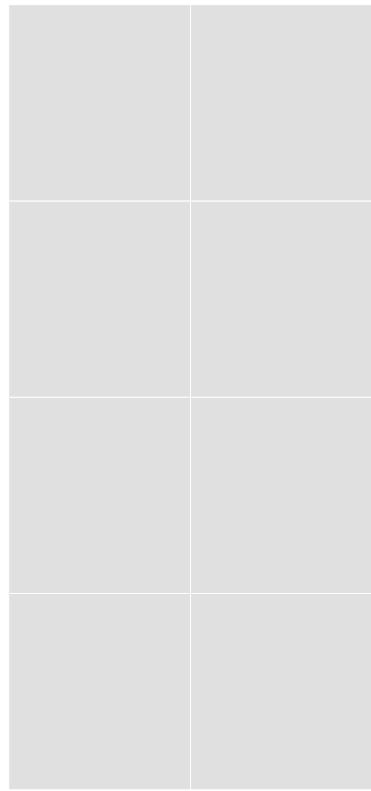

ERM      COVS\_NULL

- No
- Invasive
- ▲ Pharyngitis

emm82

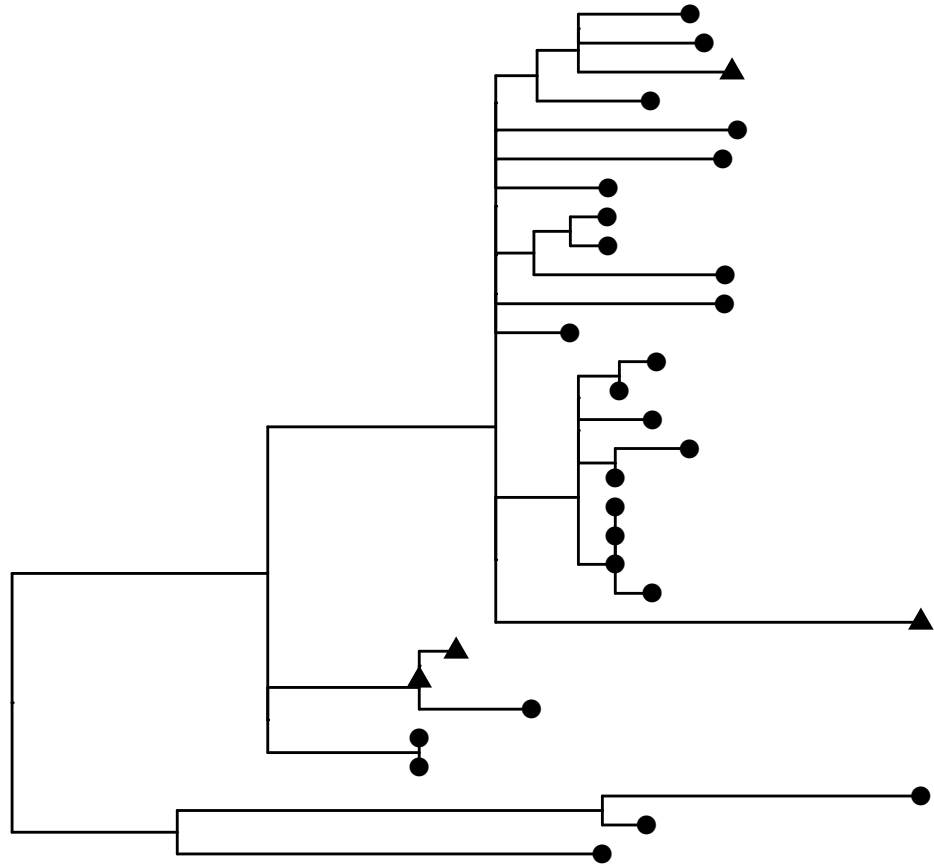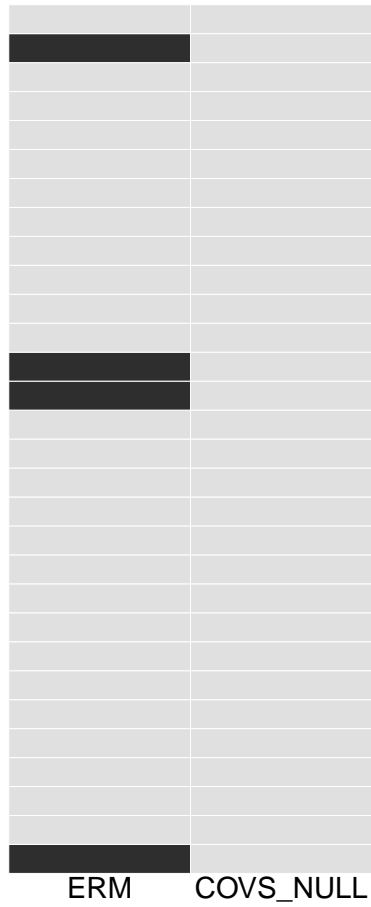

● Invasive  
▲ Pharyngitis

emm87

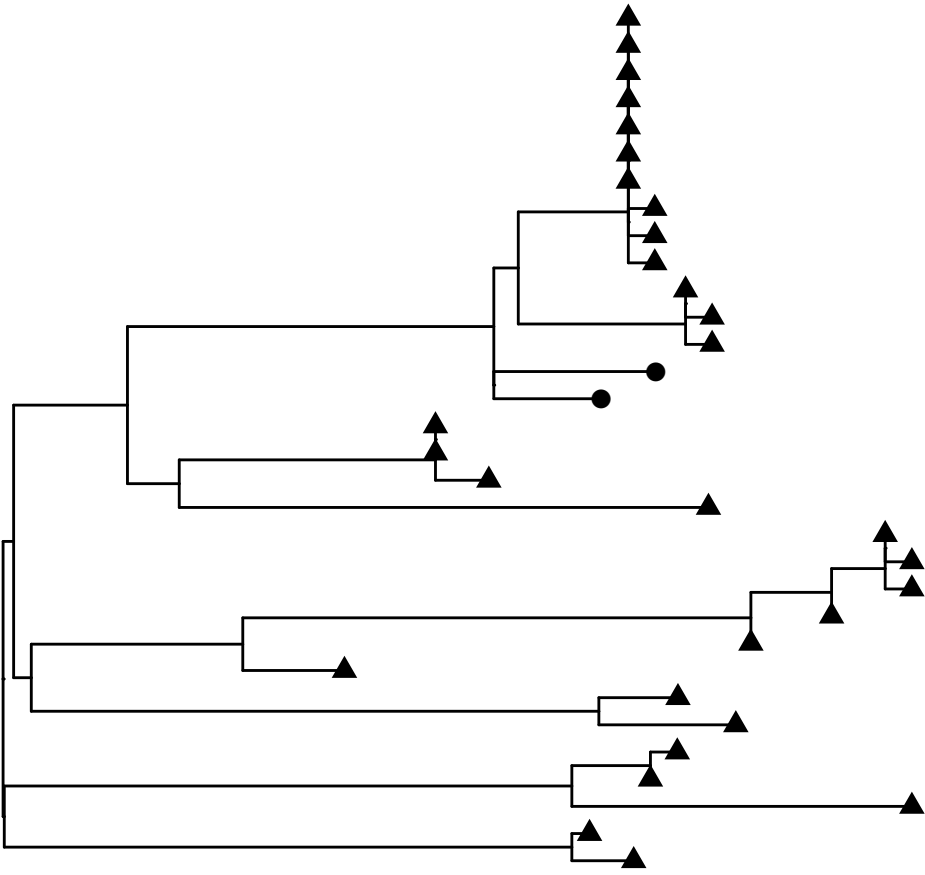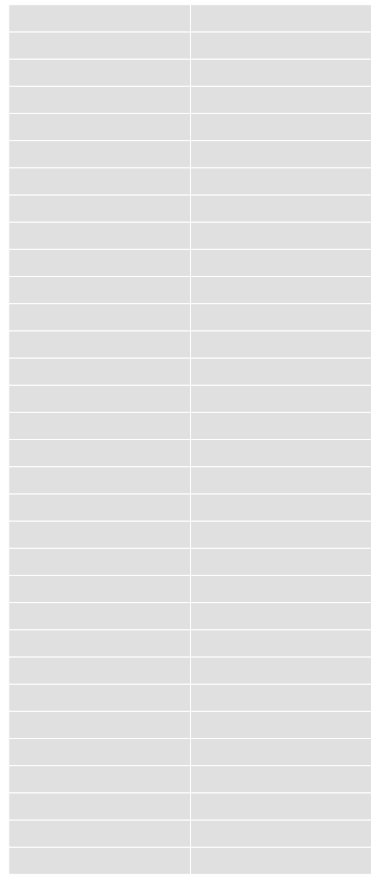

- No
- Invasive
- ▲ Pharyngitis

ERM COVS\_NULL

*emm89*

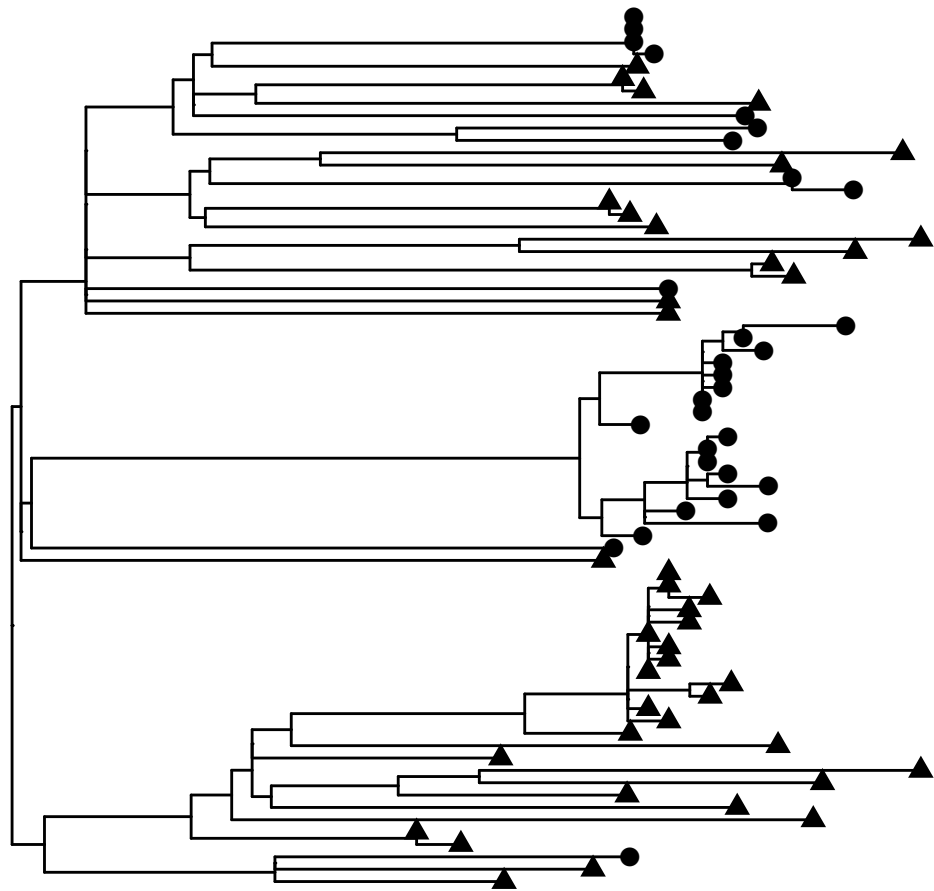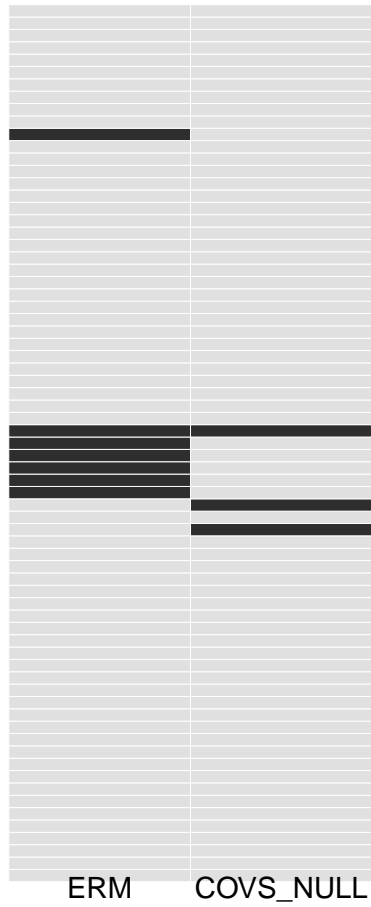

● Invasive  
▲ Pharyngitis

ERM COVS\_NULL

*emm9*

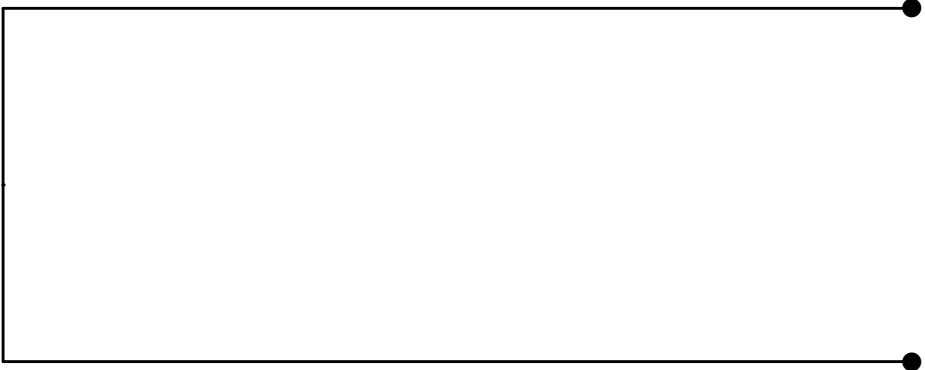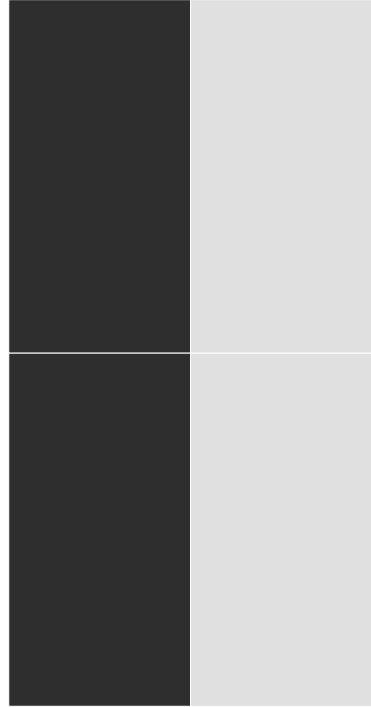

No  
Yes

● Pharyngitis

ERM COVS\_NULL

emm92

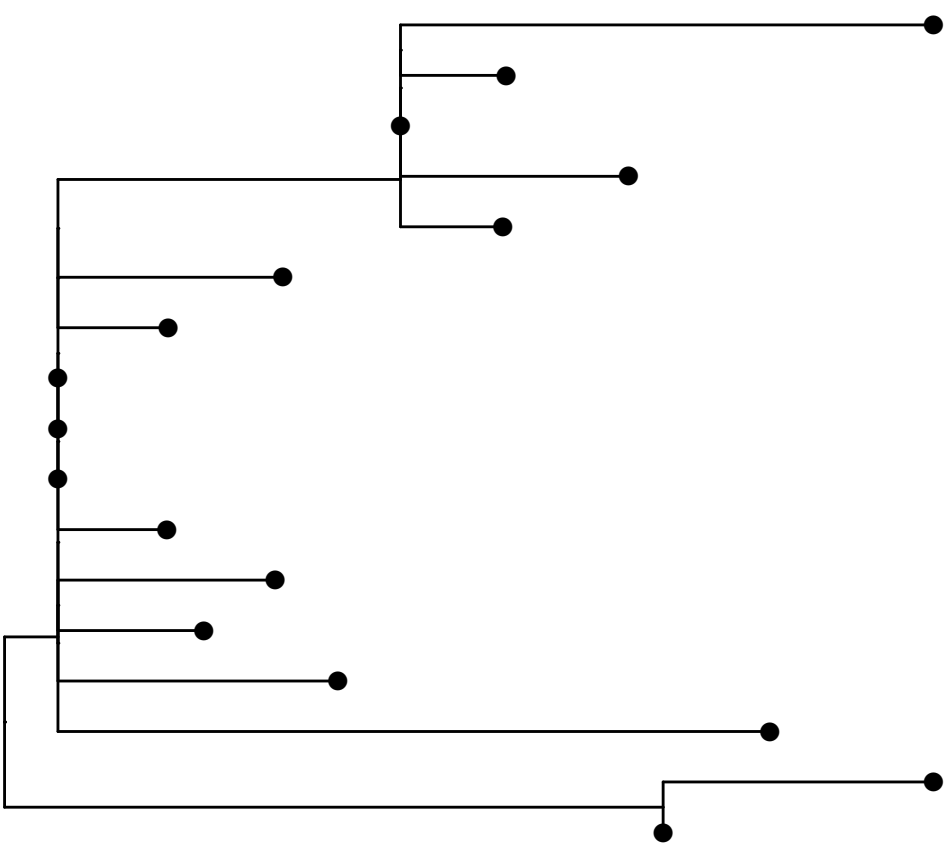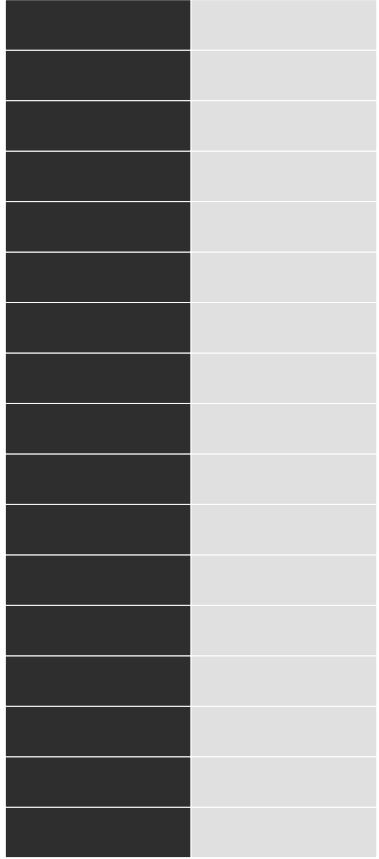

● Invasive

No

Yes

ERM COVS\_NULL

*emm95*

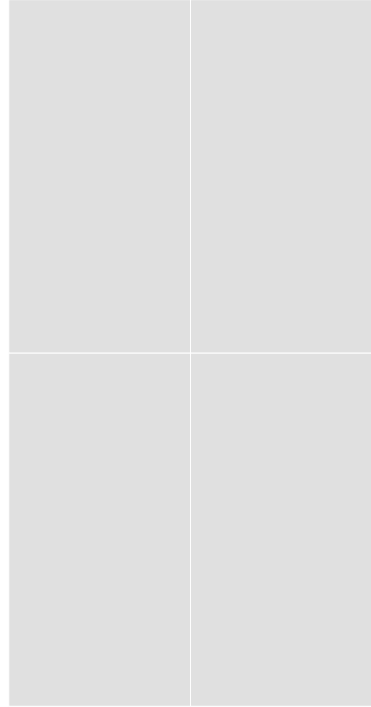

No

● Pharyngitis

ERM

COVS\_NULL
