# Supplementary material
Source: PubMed Central journal article supplement (PMC9125432)

emm28

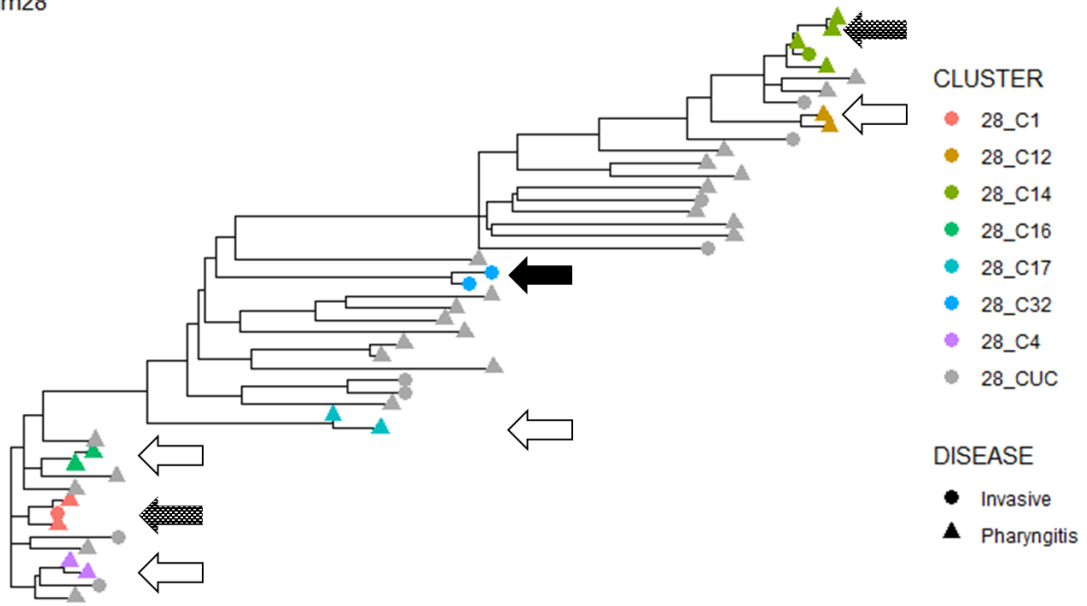

Supplement: NIHMS1798262-supplement-FigureS1.pdf [file NIHMS1798262-supplement-FigureS1.pdf]
